# Supplementary material for: Heterometallic ruthenium–osmium complexes: dual photodynamic and photothermal therapy for melanoma and drug-resistant lung tumourin vivo
Source: Royal Society of Chemistry journal article supplement (doi:10.1039/d3qi00903c), 2023-01-01
Supplement: d3qi00903c1.pdf [file d3qi00903c1.pdf]

### Supporting Information

#### **Heterometallic ruthenium-osmium complexes: dual photodynamic and photothermal therapy for melanoma and drug-resistant lung tumor in vivo**

Yu-Ang Deng,<sup>‡a</sup> Shi-Jie Tang,<sup>‡a</sup> Meng-Fan Wang,<sup>a</sup> Xiaoxia Ren,<sup>b</sup> Xue-Lian Li,<sup>a</sup> Li-Zhen Zeng,<sup>a</sup> Dan-Ni Ren,<sup>a</sup> Meng-Ru Wang,<sup>a</sup> Wei-Lie Xiao,<sup>a</sup> Zhong-Yan Cai,<sup>b</sup> Dan Zhang,<sup>c</sup> Hongbin Zhang<sup>a</sup> and Feng Gao\*<sup>a</sup>

- 1 Key Laboratory of Medicinal Chemistry for Natural Resource, Ministry of Education; School of Pharmacy, Yunnan University, Kunming, P. R. China
- 2 Animal Research and Resource Center, School of Life Sciences, Yunnan University, Kunming, P. R. China
- 3 First Affiliated Hospital of Kunming Medical University, Kunming, P. R. China

E-mail: gaofeng@ynu.edu.cn

## 1. General

**Instruments.**  $^1\text{H}$  and  $^{13}\text{C}$  NMR spectra were recorded on a Bruker AVANCE NEO 400 MHz spectrometer. All chemical shifts are given relative to tetramethylsilane (TMS). Electron Spray ionization mass spectra (ESI-MS) were recorded on AB QSTAR Pulsar mass spectrometer. Microanalysis (C, H, and N) was carried out with a Perkin-Elmer 240Q elemental analyzer. High-performance liquid chromatography (HPLC) was recorded on an Agilent 1260 Infinity II system fitted with a RP-C18 column (Gemini-NX C18, 4.6 mm $\times$ 250 mm, 25  $^\circ\text{C}$ ) and a diode array detector. Solvent A ( $\text{H}_2\text{O}$ -0.1%  $\text{HCOOH}$ ) and solvent B ( $\text{CH}_3\text{CN}$ ) were used as the mobile phases which was eluted at a flow rate of 1 mL/min with the following gradient: 10%–100% B (0–30 min). UV–Vis spectra were recorded on a Perkin-Elmer Lambda 365 spectrophotometer equipped with a temperature controller accessory and circulating water system. Fluorescence spectra were recorded on a Hitachi F-4700 fluorescence spectrophotometer. Time-resolved photoluminescence spectra was tested on an Edinburgh FLS1000 Photoluminescence Spectrometer. FT-IR spectra were recorded on a Nicolet iS 10 FTIR spectrometer. Two-photon photoluminescence spectra were recorded on a SpectroPro300i instrument, and the pump laser beam came from a Ti:sapphire laser system (pulse duration, 200 fs; repetition rate, 76 MHz; Coherent Mira900-D). TPA cross-sections were measured by using the two-photon-induced fluorescence.

**Materials.** Potassium phthalimide, 3,4-dichloro-1,2,5-thiadiazole, acetonitrile (MeCN) and methylamine hydrochloride were purchased from Adamas-beta were synthesized according to the literature methods.  $\text{CD}_3\text{CN}$  and  $\text{DMSO}-d_6$  were purchased from Energy Chemical. Aluminium oxide (200–300 mesh), ammonium hydroxide, ethylene glycol (ethylene glycol), ethanol (EtOH), N,N-dimethylformamide (DMF), trichloromethane ( $\text{CHCl}_3$ ), acetone and toluene were purchased from Greagent. The compounds 3,4-diamino-1,2,5-thiadiazole (**1**), 1,10-phenanthroline-5,6-dione (**2**), [1,2,5]thiadiazolo[3',4':5,6]pyrazino[2,3-*f*][1,10]phenanthroline (**3**), pyrazino[2,3-*f*][1,10]phenanthroline-2,3-diamine (**4**), *cis*-[Ru(L) $_2$ Cl $_2$ ] $\cdot$ 2H $_2$ O (L = bpy, phen, dip, or tbupy, where bpy = 2,2'-bipyridine, phen = 1,10-phenanthroline, dip = 4,7-diphenyl-1,10-phenanthroline, and tbupy = 4,4'-di-*tert*-butyl-2,2'-bipyridine), *cis*-[Os(L) $_2$ Cl $_2$ ] $\cdot$ 2H $_2$ O (L = bpy, phen, dip, or tbupy, where bpy = 2,2'-bipyridine, phen = 1,10-phenanthroline, dip = 4,7-diphenyl-1,10-phenanthroline, and tbupy = 4,4'-di-*tert*-butyl-2,2'-bipyridine) were synthesized according to the literature.<sup>1-4</sup>

## 2. Synthesis and Characterization

### 2.1. Preparation of mononuclear precursors $[\text{Ru}(\text{L}1)_2(\text{pppp})]^{2+}$ :

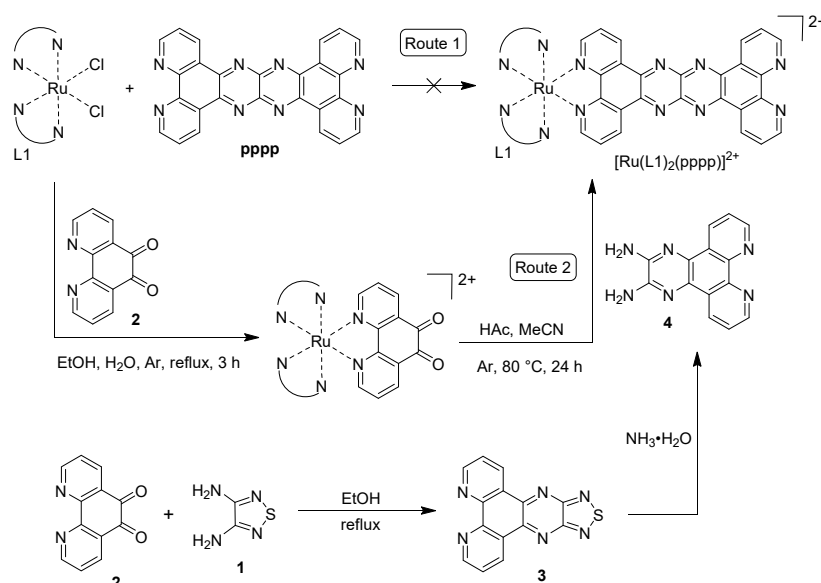

**Scheme S1.** Synthetic route to the mononuclear  $[\text{Ru}(\text{L}1)_2(\text{pppp})]^{2+}$  precursors.

1,10-Phenanthroline-5,6-dione (**2**, 252 mg, 1.2 mmol) was refluxed with *cis*- $[\text{Ru}(\text{L}1)_2\text{Cl}_2]$  (1 mmol) in 30 mL of water/EtOH (1:1, v/v) for 3 h under Ar. The dark red solution was cooled to 20 °C. After removal of EtOH,  $\text{NH}_4\text{PF}_6$  (1 g, 6.2 mmol) was added and stirred for 0.5 h.  $[\text{Ru}(\text{L}1)_2(\text{phendione})](\text{PF}_6)_2$  precipitated as brown solid, which was isolated by suction filtration, washed by small amount of water, EtOH and diethyl ether ( $3 \times 10$  mL), and dried in vacuo. The ligand pyrazino[2,3-*f*][1,10]phenanthroline-2,3-diamine (**4**, 157 mg, 0.6 mmol) was stirred with  $[\text{Ru}(\text{L}1)_2(\text{phendione})]$  (0.6 mmol) in 50 mL of MeCN/HAc (1:1, v/v) at 80 °C for 24 h under Ar. After removal of MeCN, the dark red solution was poured into 80 mL of water and neutralized with ammonia (1 M). The mononuclear  $[\text{Ru}(\text{L}1)_2(\text{pppp})](\text{PF}_6)_2$  precursors precipitated as red solid, which was isolated by suction filtration, washed by small amount of water, EtOH and diethyl ether ( $3 \times 10$  mL), and dried in vacuo. The crude product was purified by flash column chromatography on alumina (200–300 mesh) with MeCN/Tol (1:1–2:1) as eluent.

$[\text{Ru}(\text{bpy})_2(\text{pppp})](\text{PF}_6)_2$ : Yield 536 mg, 76%.  $^1\text{H NMR}$  (400 MHz,  $\text{DMSO-}d_6$ ): 9.67 (s, 4H), 9.21 (s, 2H), 8.92 (t,  $J = 9.6$  Hz, 4H), 8.35 (s, 2H), 8.26 (td,  $J = 7.9, 1.5$  Hz, 2H), 8.17 (td,  $J = 7.9, 1.5$  Hz, 2H), 8.10 (s, 2H), 8.04 (s, 2H), 7.90 (d,  $J = 5.7$  Hz, 2H), 7.85 (d,  $J = 5.2$  Hz, 2H), 7.63 (t,  $J = 6.3$  Hz, 2H), 7.45 (t,  $J = 6.3$  Hz, 2H). MS (ESI) calcd for  $\text{C}_{46}\text{H}_{28}\text{N}_{12}\text{Ru} [\text{M}-2\text{PF}_6]^{2+}$ : 425.08; Found: 425.04.

$[\text{Ru}(\text{phen})_2(\text{pppp})](\text{PF}_6)_2$ : Yield 603 mg, 82%.  $^1\text{H NMR}$  (400 MHz,  $\text{DMSO-}d_6$ ): 9.55 (d,  $J = 39.7$  Hz, 4H),

8.84 (t,  $J = 7.5$  Hz, 4H), 8.78 (d,  $J = 7.5$  Hz, 2H), 8.54 (s, 2H), 8.44 (s, 4H), 8.39 (s, 2H), 8.11 (d,  $J = 5.4$  Hz, 2H), 7.96 (s, 2H), 7.89 (t,  $J = 13.6$  Hz, 2H), 7.82 (dd,  $J = 8.3, 5.3$  Hz, 2H), 7.77 (dd,  $J = 8.3, 5.0$  Hz, 2H). MS (ESI) calcd for  $C_{50}H_{28}N_{12}Ru [M-2PF_6]^{2+}$ : 450.08; Found: 450.19.

[Ru(dip)<sub>2</sub>(pppp)](PF<sub>6</sub>)<sub>2</sub>: Yield 660 mg, 72%. <sup>1</sup>H NMR (400 MHz, DMSO-*d*<sub>6</sub>): 9.64 (d,  $J = 8.1$  Hz, 4H), 9.11 (s, 2H), 8.58 (d,  $J = 5.5$  Hz, 2H), 8.45 (s, 2H), 8.37 (d,  $J = 5.5$  Hz, 2H), 8.31 (s, 4H), 8.07 (t,  $J = 6.9$  Hz, 2H), 8.02 (s, 2H), 7.87 (d,  $J = 5.5$  Hz, 4H), 7.76–7.63 (m, 20H). MS (ESI) calcd for  $C_{50}H_{28}N_{12}Ru [M-2PF_6]^{2+}$ : 601.14; Found: 600.33.

[Ru(tbubpy)<sub>2</sub>(pppp)](PF<sub>6</sub>)<sub>2</sub>: Yield 622 mg, 74%. <sup>1</sup>H NMR (400 MHz, DMSO-*d*<sub>6</sub>): 9.54 (d,  $J = 33.4$  Hz, 4H), 8.91 (d,  $J = 6.9$  Hz, 6H), 8.29 (s, 2H), 8.08 (s, 2H), 7.98 (s, 2H), 7.88 (s, 2H), 7.76–7.61 (m, 4H), 7.45 (dd,  $J = 6.4, 1.8$  Hz, 2H). MS (ESI) calcd for  $C_{62}H_{60}N_{12}Ru [M-2PF_6]^{2+}$ : 537.20; Found: 537.20.

## 2.2. Preparation of hetero-dinuclear complexes [Ru(L1)<sub>2</sub>(pppp)Os(L2)<sub>2</sub>]<sup>2+</sup> (RuOs1–8):

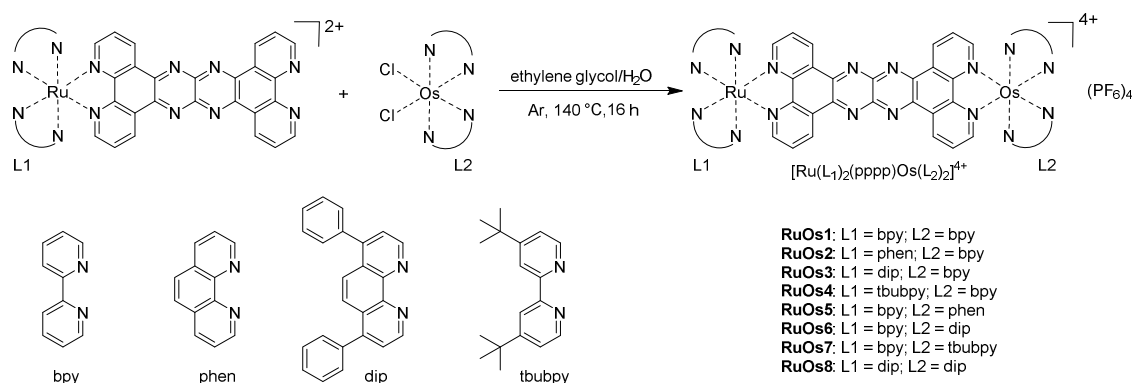

### Scheme S2. Synthetic route to the heteronuclear [Ru(L1)<sub>2</sub>(pppp)Os(L2)<sub>2</sub>]<sup>2+</sup>.

[Ru(L1)<sub>2</sub>(pppp)](PF<sub>6</sub>)<sub>2</sub> (0.2 mmol) was stirred with *cis*-[Os(L2)<sub>2</sub>Cl<sub>2</sub>] (0.22 mmol, 1.1 eq.), 1 mL water and 6 mL EG under Ar at 140 °C for 16 h. The black solution was cooled to 20 °C and poured into water (20 mL). Upon addition of NH<sub>4</sub>PF<sub>6</sub> (1 g, 6.2 mmol) in water (5 mL), the heteronuclear Ru(II)-Os(II) complexes [Ru(L1)<sub>2</sub>(pppp)Os(L2)<sub>2</sub>](PF<sub>6</sub>)<sub>4</sub> precipitated as black solid, which was isolated by suction filtration, washed by small amount of water, EtOH and diethyl ether (3 × 10 mL), and dried in vacuo. The crude product was purified by flash column chromatography on alumina (200–300 mesh) with MeCN/Tol (1:1–4:1) as eluent.

**RuOs1** (L1 = bpy, L2 = bpy): dark brown solid. Yield 319 mg, 81%. Anal. Calcd for  $C_{66}H_{44}F_{24}N_{16}P_4OsRu \cdot 2H_2O$ : C, 40.27; H, 2.46; N, 11.39. Found: C, 39.99; H, 2.71; N, 11.12. <sup>1</sup>H NMR (400 MHz, DMSO-*d*<sub>6</sub>)  $\delta$  9.78 (d,  $J = 8.1$  Hz, 2H), 9.55 (d,  $J = 8.2$  Hz, 2H), 8.90 (d,  $J = 17.2$  Hz, 2H), 8.36 (d,  $J = 5.4$  Hz, 2H), 8.30 (d,  $J = 5.2$  Hz, 2H), 8.26 (t,  $J = 8.2$  Hz, 2H), 8.17 (t,  $J = 7.7$  Hz, 2H), 8.11 (t,  $J = 6.8$  Hz, 2H), 8.06

(t,  $J = 7.6$  Hz, 2H), 7.99 (q,  $J = 7.2$  Hz, 4H), 7.85 (d,  $J = 5.6$  Hz, 2H), 7.81 (d,  $J = 5.6$  Hz, 1H), 7.76 (d,  $J = 5.6$  Hz, 2H), 7.70 (d,  $J = 5.6$  Hz, 2H), 7.63 (t,  $J = 6.7$  Hz, 2H), 7.54 (t,  $J = 6.7$  Hz, 2H), 7.43 (t,  $J = 6.8$  Hz, 2H), 7.33 (t,  $J = 6.8$  Hz, 2H).  $^{13}\text{C}$  NMR (100 MHz, DMSO- $d_6$ ):  $\delta$  158.85, 158.47, 158.32, 156.71, 156.48, 152.04, 151.34, 138.19, 138.08, 137.61, 128.42, 127.99, 124.81, 124.65. MS (ESI) calcd for  $\text{C}_{66}\text{H}_{44}\text{N}_{16}\text{OsRu} [\text{M}-4\text{PF}_6]^{4+}$ : 338.5643; Found: 338.5649. FTIR (KBr)  $\nu_{\text{max}}$  ( $\text{cm}^{-1}$ ): 3067 (CH, aryl), 2924 (CH, aryl), 2853 (CH, aryl), 1659 (C=C, aryl), 1603 (C=C, aryl), 1463 (C=C, aryl), 1445 (C=C, aryl), 1424 (CH, aryl), 1359 (CN, pyridyl), 1312 (CN, pyridyl), 1267 (CN, pyridyl), 1161 (CN, pyrazine), 1074 (CN, pyrazine), 1024 (CH, aryl), 841 (PF), 764 (C=C, aryl), 727 (C=C, aryl), 661 (CH, aryl), 558 (PF).

**RuOs2** (L1 = phen, L2 = bpy): dark brown solid. Yield 295 mg, 73%. Anal. Calcd for  $\text{C}_{70}\text{H}_{44}\text{F}_{24}\text{N}_{16}\text{P}_4\text{OsRu}\cdot 2\text{H}_2\text{O}$ : C, 41.70; H, 2.40; N, 11.11. Found: C, 41.46; H, 2.67; N, 10.83.  $^1\text{H}$  NMR (400 MHz, DMSO- $d_6$ ): 9.76 (d,  $J = 8.2$  Hz, 2H), 9.55 (d,  $J = 8.1$  Hz, 2H), 8.89 (dd,  $J = 12.0, 5.3$  Hz, 4H), 8.82 (dd,  $J = 10.0, 5.6$  Hz, 4H), 8.43 (s, 4H), 8.32 (s, 2H), 8.31 (d,  $J = 3.7$  Hz, 2H), 8.08 (d,  $J = 3.4$  Hz, 2H), 8.05 (t,  $J = 5.3$  Hz, 2H), 8.00 (dd,  $J = 8.2, 4.7$  Hz, 6H), 7.86 (dd,  $J = 8.3, 5.3$  Hz, 2H), 7.80 (dd,  $J = 8.3, 5.3$  Hz, 2H), 7.77 (d,  $J = 5.7$  Hz, 2H), 7.72 (s, 2H), 7.54 (t,  $J = 4.4$  Hz, 2H), 7.33 (t,  $J = 4.4$  Hz, 2H).  $^{13}\text{C}$  NMR (100 MHz, DMSO- $d_6$ ):  $\delta$  158.51, 158.38, 155.18, 154.20, 153.63, 153.28, 152.71, 151.98, 151.18, 150.55, 147.14, 147.09, 145.63, 143.48, 137.62, 137.52, 137.08, 134.24, 133.45, 130.53, 130.50, 130.16, 129.72, 128.70, 128.42, 128.15, 128.08, 126.39, 126.21, 124.72, 124.65. MS (ESI) calcd for  $\text{C}_{70}\text{H}_{44}\text{N}_{16}\text{OsRu} [\text{M}-4\text{PF}_6]^{4+}$ : 350.5643; Found: 350.5637. FTIR (KBr)  $\nu_{\text{max}}$  ( $\text{cm}^{-1}$ ): 3066 (CH, aryl), 2923 (CH, aryl), 2852 (CH, aryl), 1667 (C=C, aryl), 1428 (CH, aryl), 1358 (CN, pyridyl), 1312 (CN, pyridyl), 1118 (CN, pyrazine), 1073 (CN, pyrazine), 839 (PF), 720 (C=C, aryl), 557 (PF).

**RuOs3** (L1 = dip, L2 = bpy): dark brown solid. Yield 330 mg, 71%. Anal. Calcd for  $\text{C}_{94}\text{H}_{60}\text{F}_{24}\text{N}_{16}\text{P}_4\text{OsRu}\cdot 2\text{H}_2\text{O}$ : C, 48.65; H, 2.78; N, 9.66. Found: C, 48.39; H, 2.97; N, 9.42.  $^1\text{H}$  NMR (400 MHz, DMSO- $d_6$ )  $\delta$  9.82 (d,  $J = 8.2$  Hz, 2H), 9.55 (d,  $J = 8.1$  Hz, 2H), 8.89 (dd,  $J = 13.0, 8.1$  Hz, 4H), 8.45 (dd,  $J = 10.4, 5.4$  Hz, 4H), 8.36 (d,  $J = 5.4$  Hz, 2H), 8.33–8.27 (m, 6H), 8.08 (dt,  $J = 16.1, 7.3$  Hz, 4H), 8.00 (q,  $J = 8.4, 7.6$  Hz, 4H), 7.86 (d,  $J = 5.5$  Hz, 4H), 7.76 (d,  $J = 5.6$  Hz, 2H), 7.72–7.63 (m, 22H), 7.54 (t,  $J = 6.8$  Hz, 2H), 7.33 (t,  $J = 6.8$  Hz, 2H).  $^{13}\text{C}$  NMR (100 MHz, DMSO- $d_6$ ):  $\delta$  158.57, 158.49, 158.43, 152.89, 152.60, 151.27, 150.58, 150.34, 148.23, 148.02, 137.71, 137.31, 135.50, 135.43, 130.02, 129.94, 129.76, 129.23, 128.50, 128.42, 128.32, 128.21, 126.65, 126.41, 126.10, 124.88, 124.77. MS (ESI) calcd for  $\text{C}_{94}\text{H}_{60}\text{N}_{16}\text{OsRu} [\text{M}-4\text{PF}_6]^{4+}$ : 426.5956; Found: 426.5957. FTIR (KBr)  $\nu_{\text{max}}$  ( $\text{cm}^{-1}$ ): 3067 (CH, aryl), 2924 (CH, aryl), 2852 (CH, aryl), 1666 (C=C, aryl), 1606 (C=C, aryl), 1465 (C=C, aryl), 1447 (C=C, aryl), 1420 (CH, aryl), 1360

(CN, pyridyl), 1313 (CN, pyridyl), 1265 (CN, pyridyl), 1162 (CN, pyrazine), 1120 (CN, pyrazine), 839 (PF), 765 (C=C, aryl), 726 (C=C, aryl), 705 (C=C, aryl), 662 (CH, aryl), 558 (PF).

**RuOs4** (L1 = tbubpy, L2 = bpy): dark brown solid. Yield 334 mg, 76%. Anal. Calcd for  $C_{82}H_{76}F_{24}N_{16}P_4OsRu \cdot 2H_2O$ : C, 44.92; H, 3.68; N, 10.22. Found: C, 44.71; H, 3.91; N, 9.96.  $^1H$  NMR (400 MHz, DMSO- $d_6$ )  $\delta$  9.77 (d,  $J$  = 8.2 Hz, 2H), 9.54 (d,  $J$  = 8.1 Hz, 2H), 8.19–8.10 (m, 8H), 8.29 (s, 4H), 8.13 (t,  $J$  = 6.8 Hz, 2H), 8.07 (t,  $J$  = 7.8 Hz, 2H), 8.00 (q,  $J$  = 7.8, 7.2 Hz, 4H), 7.76 (d,  $J$  = 5.6 Hz, 2H), 7.72–7.62 (m, 8H), 7.54 (t,  $J$  = 6.8 Hz, 2H), 7.41 (d,  $J$  = 6.2 Hz, 2H), 7.33 (t,  $J$  = 6.8 Hz, 2H).  $^{13}C$  NMR (100 MHz, DMSO- $d_6$ )  $\delta$  162.05, 161.95, 158.48, 158.40, 158.35, 156.44, 156.32, 151.33, 151.16, 150.66, 150.47, 150.27, 137.60, 137.48, 137.20, 128.41, 128.32, 128.20, 124.89, 124.76, 124.66, 124.36, 122.02, 121.91, 118.05, 35.54, 35.44, 30.06, 29.97. MS (ESI) calcd for  $C_{82}H_{76}N_{16}OsRu [M-4PF_6]^{4+}$ : 394.6269; Found: 394.6271. FTIR (KBr)  $\nu_{max}$  ( $cm^{-1}$ ): 2961 (CH, aryl), 2924 (CH, aryl), 2852 (CH, aryl), 1671 (C=C, aryl), 1614 (C=C, aryl), 1465 (C=C, aryl), 1415 (CH, aryl), 1361 (CN, pyridyl), 1254 (CN, pyridyl), 1161 (CN, pyrazine), 1120 (CN, pyrazine), 1074 (CN, pyrazine), 1025 (CH, aryl), 840 (PF), 765 (C=C, aryl), 726 (C=C, aryl), 705 (C=C, aryl), 558 (PF).

**RuOs5** (L1 = bpy, L2 = phen): dark brown solid. Yield 314 mg, 78%. Anal. Calcd for  $C_{70}H_{44}F_{24}N_{16}P_4OsRu \cdot 2H_2O$ : C, 41.70; H, 2.40; N, 11.11. Found: C, 41.39; H, 2.64; N, 10.91.  $^1H$  NMR (400 MHz, DMSO- $d_6$ )  $\delta$  9.78 (d,  $J$  = 8.1 Hz, 2H), 9.51 (d,  $J$  = 8.1 Hz, 2H), 8.91 (t,  $J$  = 9.4 Hz, 4H), 8.62 (dd,  $J$  = 12.3, 8.2 Hz, 4H), 8.43 (s, 4H), 8.35 (d,  $J$  = 5.3 Hz, 2H), 8.27 (d,  $J$  = 7.9 Hz, 2H), 8.23 (d,  $J$  = 5.8 Hz, 4H), 8.17 (t,  $J$  = 7.9 Hz, 2H), 8.11 (dd,  $J$  = 8.2, 5.7 Hz, 2H), 7.99 (d,  $J$  = 5.3 Hz, 2H), 7.91–7.83 (m, 4H), 7.83–7.76 (m, 4H), 7.74 (dd,  $J$  = 8.3, 5.4 Hz, 2H), 7.63 (t,  $J$  = 6.7 Hz, 2H), 7.43 (t,  $J$  = 6.7 Hz, 2H).  $^{13}C$  NMR (100 MHz, DMSO- $d_6$ ):  $\delta$  156.75, 156.52, 154.63, 152.06, 151.96, 151.57, 151.39, 149.18, 149.04, 145.61, 138.21, 138.12, 136.93, 130.76, 128.28, 128.00, 127.75, 126.54, 126.39, 124.69, 124.58. MS (ESI) calcd for  $C_{70}H_{44}N_{16}OsRu [M-4PF_6]^{4+}$ : 350.5643; Found: 350.5647. FTIR (KBr)  $\nu_{max}$  ( $cm^{-1}$ ): 3087 (CH, aryl), 2924 (CH, aryl), 2852 (CH, aryl), 1670 (C=C, aryl), 1603 (C=C, aryl), 1469 (C=C, aryl), 1447 (C=C, aryl), 1428 (CH, aryl), 1360 (CN, pyridyl), 1313 (CN, pyridyl), 1161 (CN, pyrazine), 1120 (CN, pyrazine), 1074 (CN, pyrazine), 1024 (CH, aryl), 841 (PF), 765 (C=C, aryl), 720 (C=C, aryl), 558 (PF).

**RuOs6** (L1 = bpy, L2 = dip): dark brown solid. Yield 367 mg, 79%. Anal. Calcd for  $C_{94}H_{60}F_{24}N_{16}P_4OsRu \cdot 2H_2O$ : C, 48.65; H, 2.78; N, 9.66. Found: C, 48.41; H, 3.04; N, 9.47.  $^1H$  NMR (400 MHz, DMSO- $d_6$ )  $\delta$  9.78 (d,  $J$  = 8.2 Hz, 2H), 9.59 (d,  $J$  = 8.2 Hz, 2H), 8.90 (t,  $J$  = 9.4 Hz, 4H), 8.40 (d,  $J$  = 5.5 Hz, 2H), 8.35 (s, 4H), 8.31 (s, 4H), 7.83–7.76 (m, 6H), 8.14 (dt,  $J$  = 20.9, 7.3 Hz, 4H), 7.99 (t,  $J$  = 6.9 Hz, 2H), 7.85 (d,  $J$  = 5.7 Hz, 2H), 7.83–7.76 (m, 6H), 7.74–7.55 (m, 22H), 7.43 (t,  $J$  = 6.7 Hz, 2H).  $^{13}C$  NMR (100 MHz, DMSO-

$d_6$ ):  $\delta$  156.74, 156.52, 152.31, 151.97, 151.38, 149.94, 147.95, 138.20, 138.10, 135.15, 135.11, 130.21, 130.12, 129.71, 129.14, 128.76, 128.46, 128.00, 127.81, 126.73, 126.37, 126.22, 124.68. MS (ESI) calcd for  $C_{94}H_{60}N_{16}OsRu [M-4PF_6]^{4+}$ : 426.5956; Found: 426.5968. FTIR (KBr)  $\nu_{max}$  ( $cm^{-1}$ ): 3083 (CH, aryl), 2927 (CH, aryl), 2853 (CH, aryl), 1670 (C=C, styryl), 1603 (C=C, aryl), 1467 (C=C, aryl), 1446 (C=C, aryl), 1426 (CH, aryl), 1340 (CN, pyridyl), 1313 (CN, pyridyl), 1259 (CN, pyridyl), 1161 (CN, pyrazine), 1119 (CN, pyrazine), 1094 (CN, pyrazine), 1074 (CN, pyrazine), 1028 (CH, aryl), 837 (PF), 765 (C=C, aryl), 729 (C=C, aryl), 704 (C=C, aryl), 661 (CH, aryl), 558 (PF).

**RuOs7** (L1 = bpy, L2 = tbubpy): dark brown solid. Yield 303 mg, 69%. Anal. Calcd for  $C_{82}H_{76}F_{24}N_{16}P_4OsRu \cdot 2H_2O$ : C, 44.92; H, 3.68; N, 10.22. Found: C, 44.68; H, 3.95; N, 10.01.  $^1H$  NMR (400 MHz, DMSO- $d_6$ )  $\delta$  9.78 (d,  $J$  = 8.1 Hz, 2H), 9.52 (d,  $J$  = 8.1 Hz, 2H), 8.92 (t,  $J$  = 9.9 Hz, 8H), 8.37 (d,  $J$  = 5.5 Hz, 2H), 8.27 (t,  $J$  = 7.4 Hz, 4H), 8.18 (t,  $J$  = 7.9 Hz, 4H), 8.12 (dd,  $J$  = 8.2, 5.4 Hz, 2H), 8.01 (dd,  $J$  = 7.9, 5.5 Hz, 2H), 7.86 (d,  $J$  = 5.5 Hz, 2H), 7.81 (d,  $J$  = 5.3 Hz, 2H), 7.64 (t,  $J$  = 6.7 Hz, 2H), 7.61–7.55 (m, 6H), 7.44 (t,  $J$  = 6.6 Hz, 2H), 7.33 (d,  $J$  = 6.2 Hz, 2H).  $^{13}C$  NMR (100 MHz, DMSO- $d_6$ ):  $\delta$  161.47, 158.04, 156.83, 156.71, 156.49, 156.35, 151.96, 151.34, 150.58, 138.18, 138.01, 127.98, 125.30, 124.65, 124.47, 122.22, 35.39, 35.33, 30.23, 30.17, 30.11. MS (ESI) calcd for  $C_{82}H_{76}N_{16}OsRu [M-4PF_6]^{4+}$ : 394.6269; Found: 394.6262. FTIR (KBr)  $\nu_{max}$  ( $cm^{-1}$ ): 3087 (CH, aryl), 2961 (CH, aryl), 2924 (CH, aryl), 2852 (CH, aryl), 1668 (C=C, aryl), 1615 (C=C, aryl), 1465 (C=C, aryl), 1445 (C=C, aryl), 1423 (CH, aryl), 1360 (CN, pyridyl), 1312 (CN, pyridyl), 1273 (CN, pyridyl), 1161 (CN, pyrazine), 1117 (CN, pyrazine), 1073 (CN, pyrazine), 1028 (CH, aryl), 842 (PF), 767 (C=C, aryl), 728 (C=C, aryl), 705 (C=C, aryl), 661 (CH, aryl), 558 (PF).

**RuOs8** (L1 = dip, L2 = dip): dark brown solid. Yield 401 mg, 75%. Anal. Calcd for  $C_{122}H_{76}F_{24}N_{16}P_4OsRu \cdot 2H_2O$ : C, 54.82; H, 3.02; N, 8.38. Found: C, 54.56; H, 3.28; N, 8.14.  $^1H$  NMR (400 MHz, DMSO- $d_6$ ): 9.83 (d,  $J$  = 8.2 Hz, 2H), 9.60 (d,  $J$  = 7.4 Hz, 2H), 8.45 (t,  $J$  = 12.6 Hz, 8H), 8.36 (s, 4H), 8.32 (s, 8H), 8.11 (s, 2H), 8.00 (s, 2H), 7.87 (s, 4H), 7.80 (s, 4H), 7.68 (d,  $J$  = 15.9 Hz, 40H).  $^{13}C$  NMR (100 MHz, DMSO- $d_6$ ):  $\delta$  155.02, 154.41, 152.56, 152.33, 152.05, 151.77, 149.77, 149.73, 148.00, 147.78, 145.47, 143.38, 135.20, 135.14, 134.92, 134.88, 130.00, 129.90, 129.75, 129.66, 129.53, 128.98, 128.27, 128.06, 127.96, 126.50, 126.35, 126.23, 126.06, 125.85. MS (ESI) calcd for  $C_{122}H_{76}N_{16}OsRu [M-4PF_6]^{4+}$ : 514.6269; Found: 514.6276. FTIR (KBr)  $\nu_{max}$  ( $cm^{-1}$ ): 3060 (CH, aryl), 2925 (CH, aryl), 2852 (CH, aryl), 1669 (C=C, aryl), 1669 (C=C, aryl), 1595 (C=C, styryl), 1556 (C=C, aryl), 1445 (C=C, aryl), 1417 (CH, aryl), 1401 (CH, aryl), 1359 (CN, pyridyl), 1161 (CN, pyrazine), 1120 (CN, pyrazine), 1095 (CN, pyrazine), 1021 (CH, aryl), 837 (PF), 766 (C=C, aryl), 737 (C=C, aryl), 703 (C=C, aryl), 557 (PF).

### 3. <sup>1</sup>H NMR, <sup>13</sup>C NMR, Mass, and FT-IR Spectra of Important Intermediates and RuOs1-8

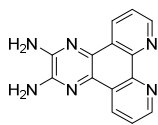

9.278  
9.257  
9.086  
9.075

8.022  
8.011  
8.002  
7.990

7.168

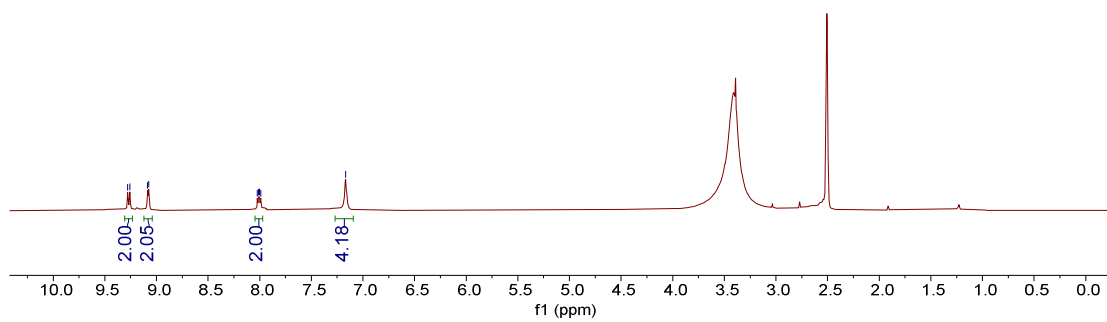



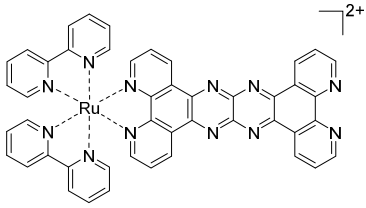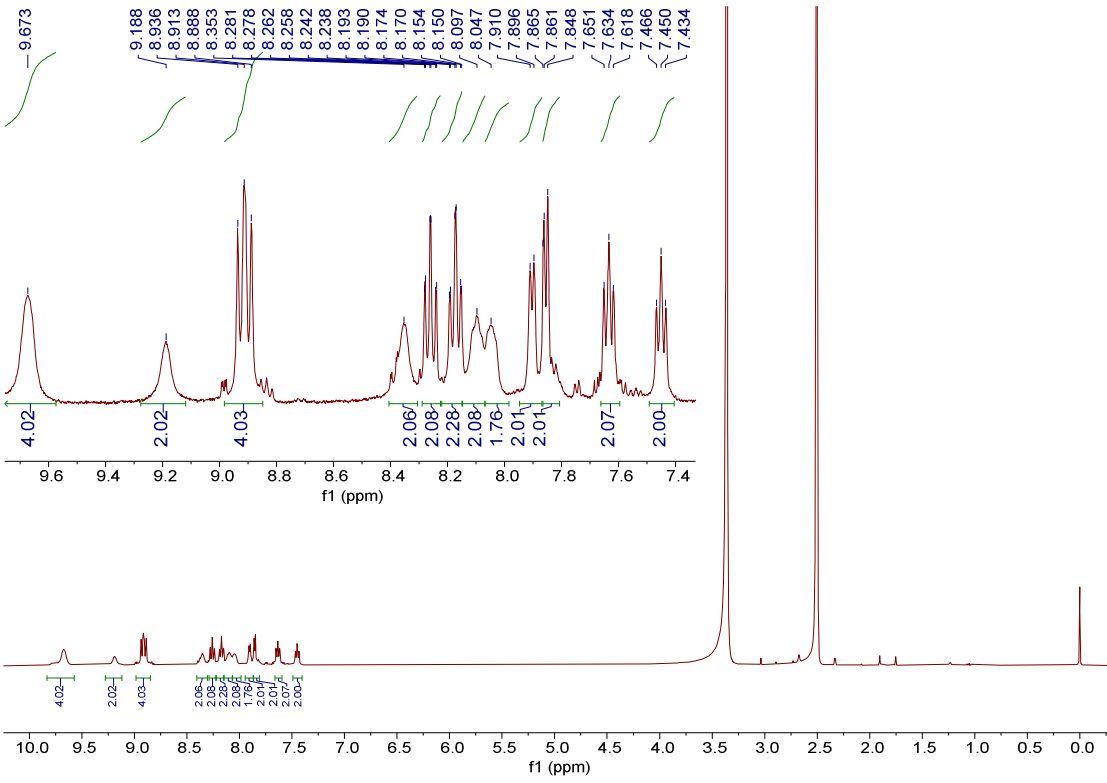

9

D11 #14 RT: 0.29 AV: 1 NL: 5.66E8  
T: + cESI/Q1MS [150.000-1500.000]

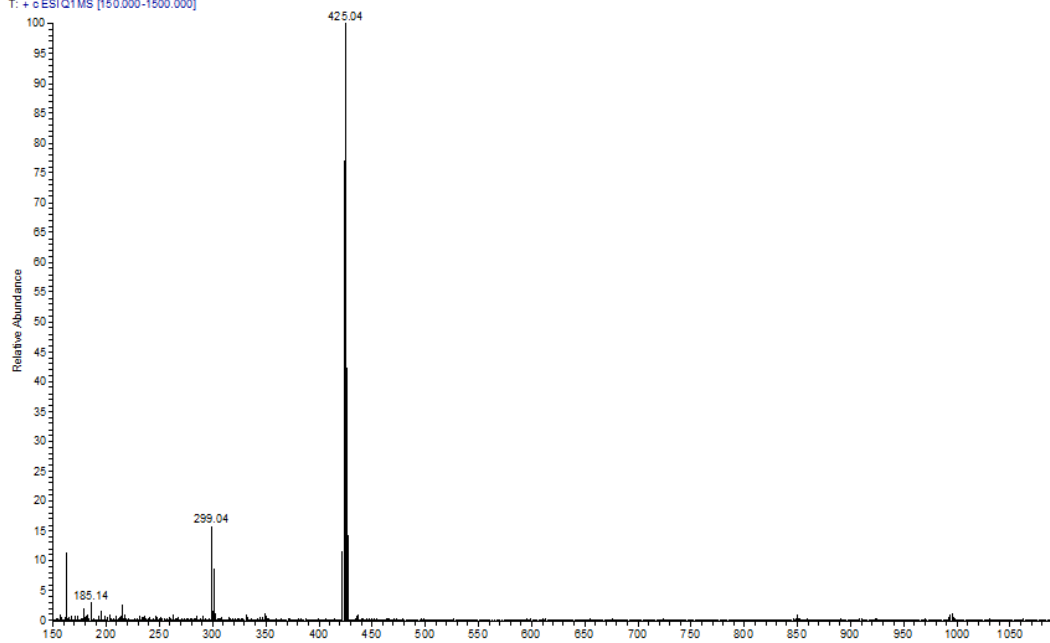

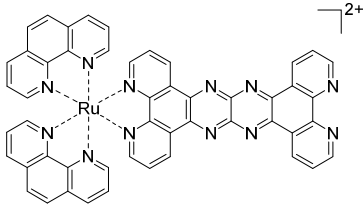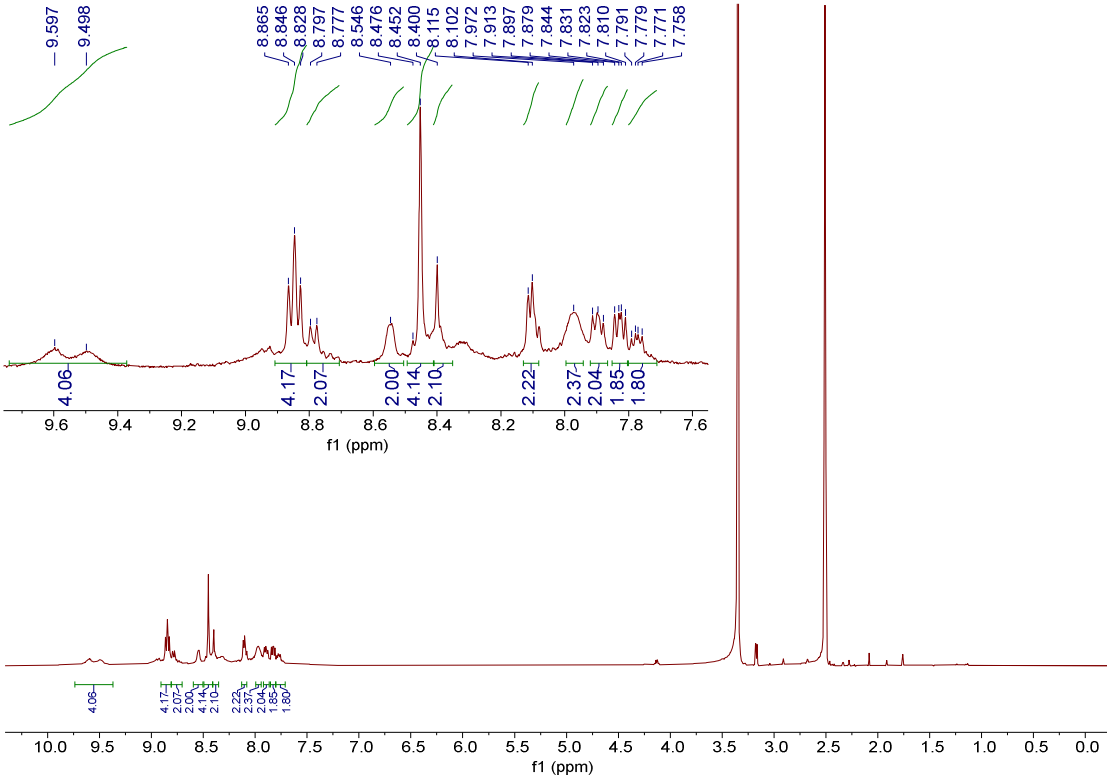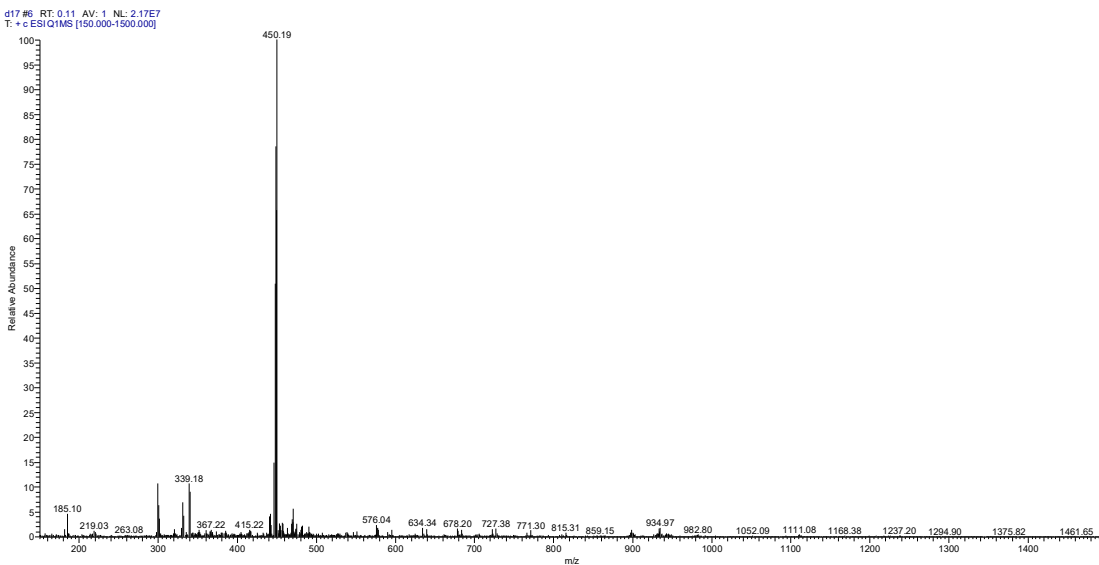

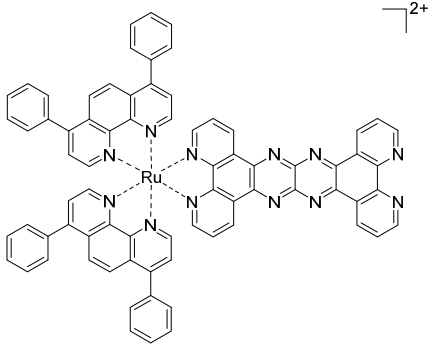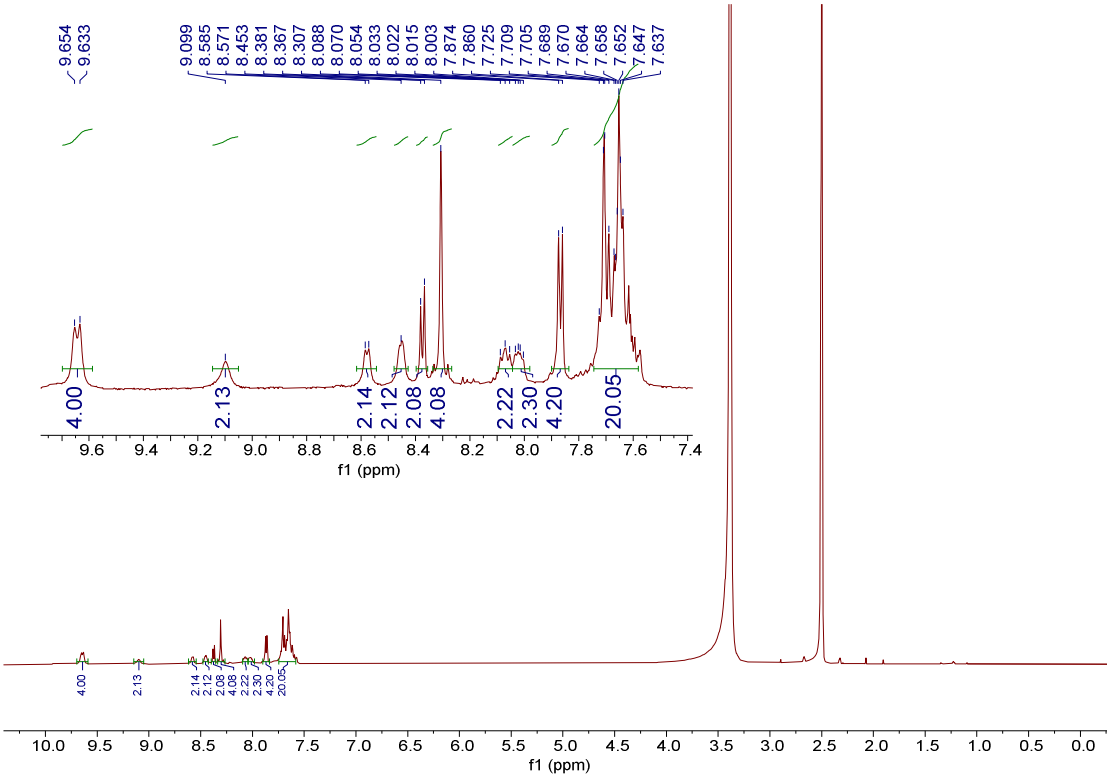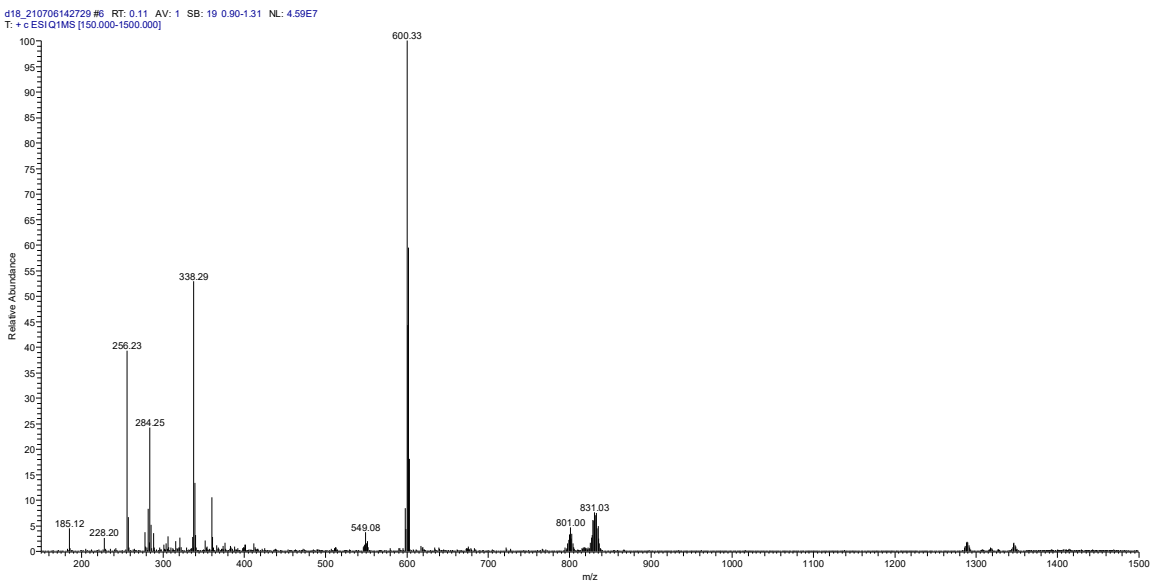

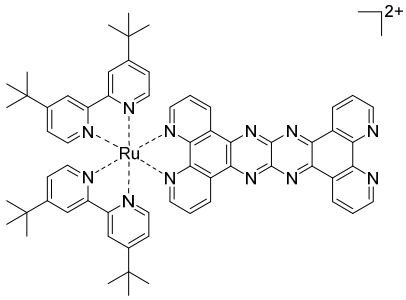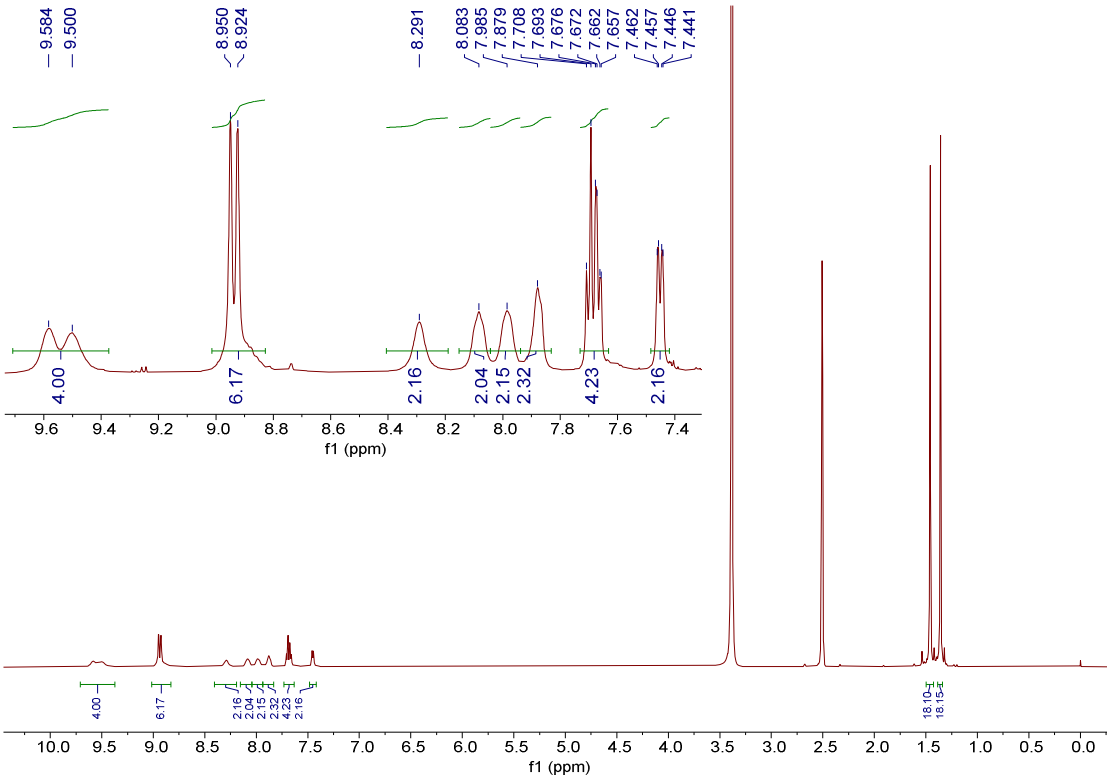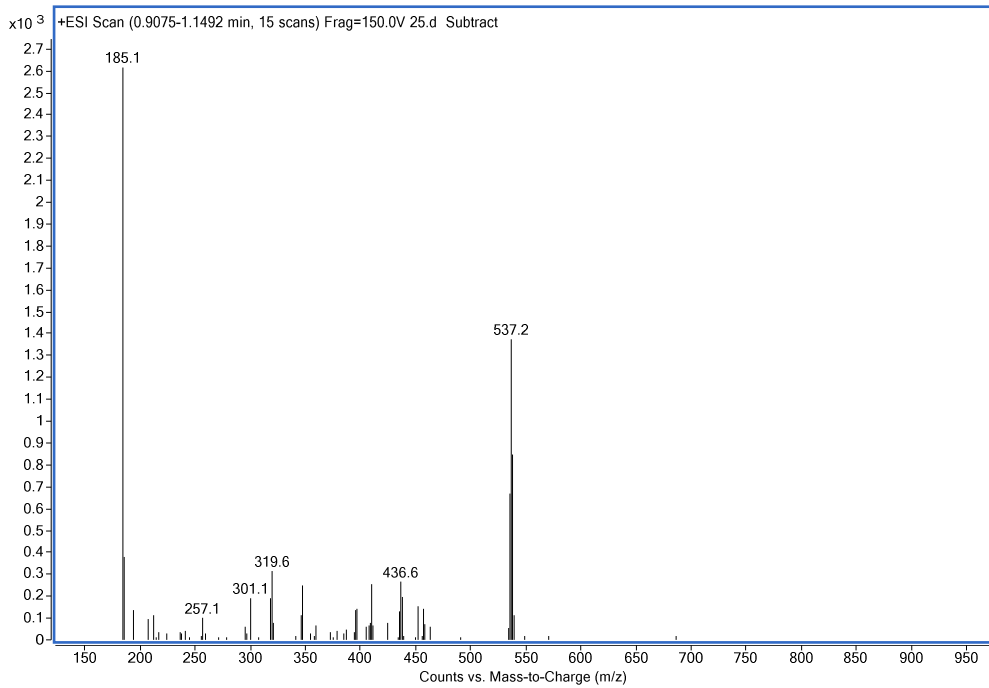

# <sup>1</sup>H NMR spectra and HRMS of RuOs1-8

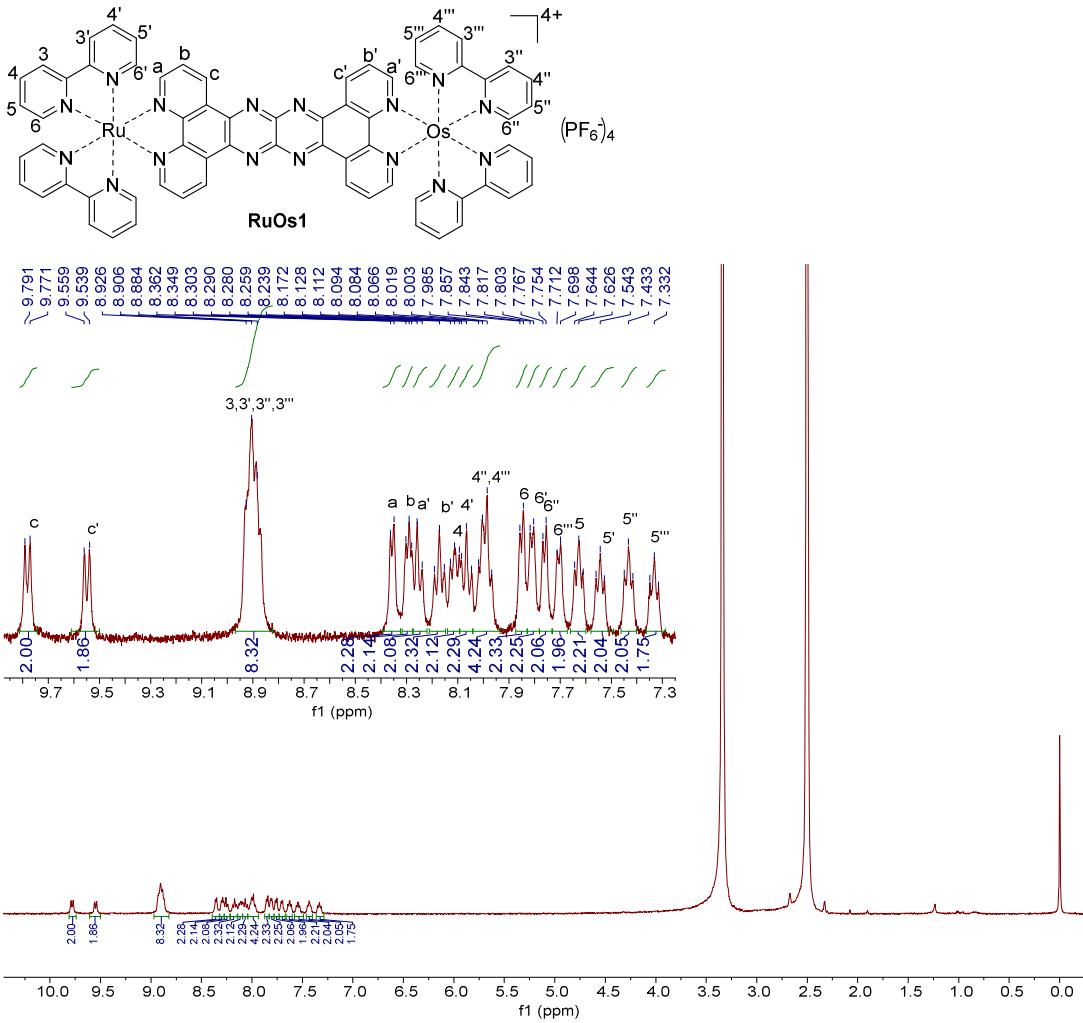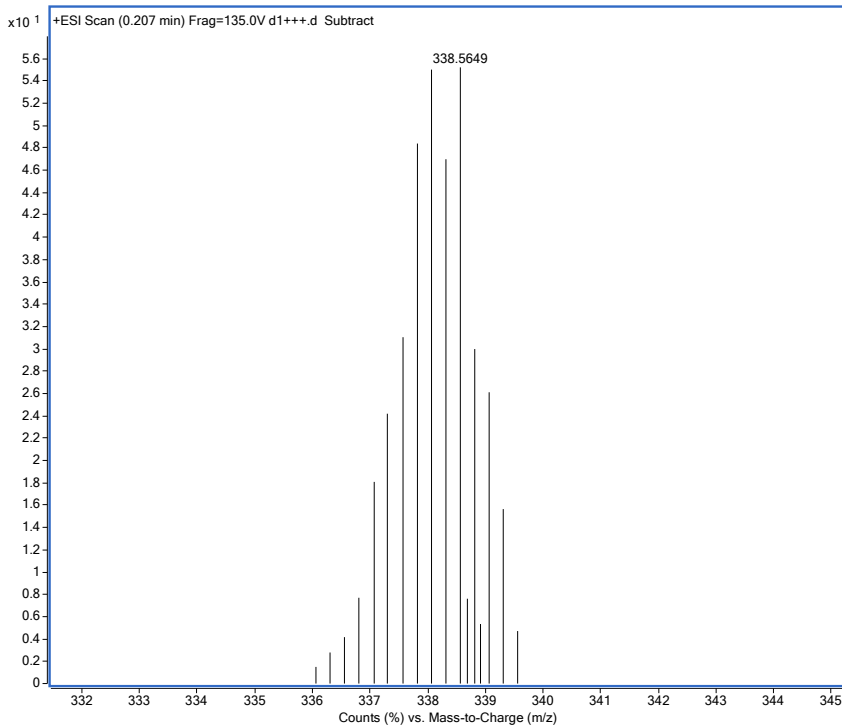

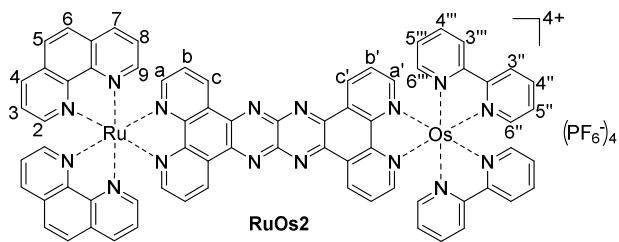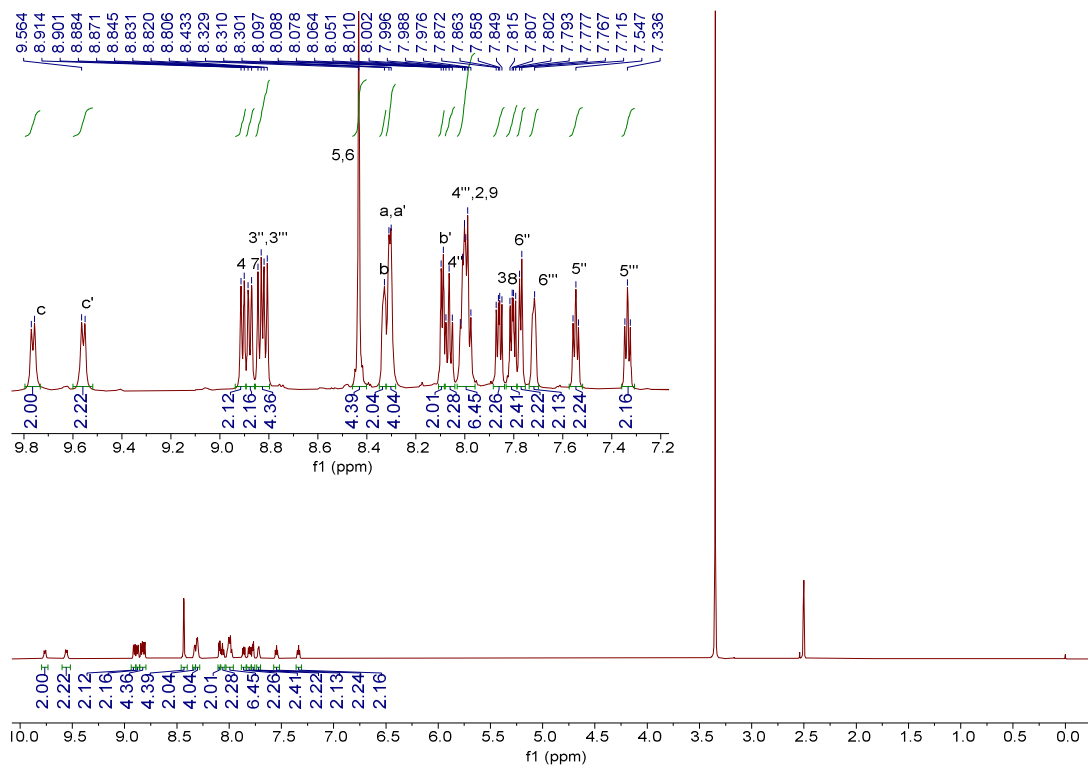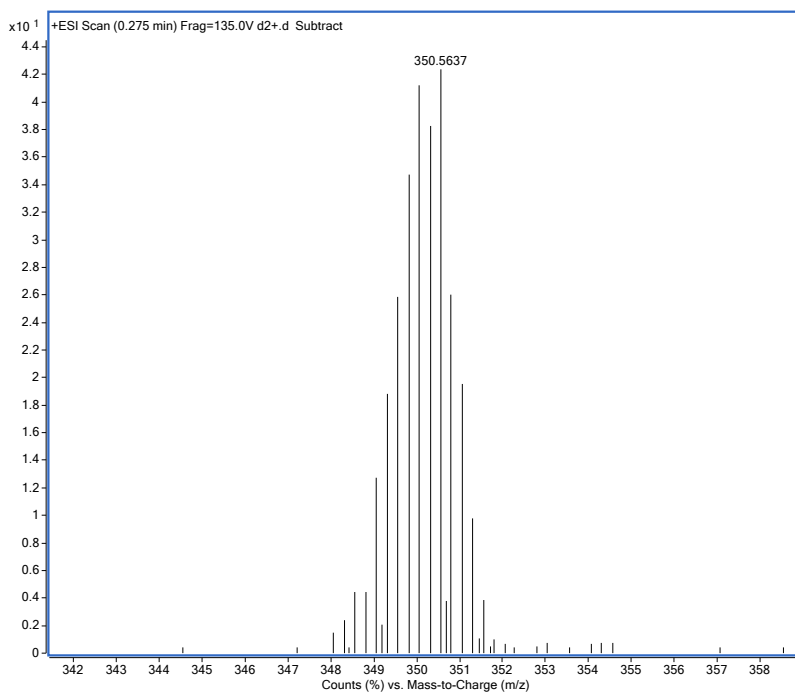

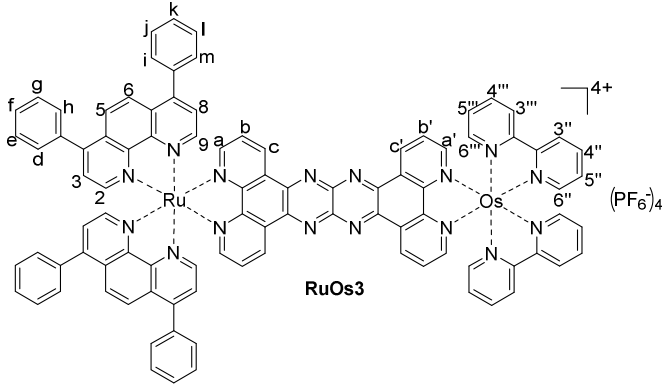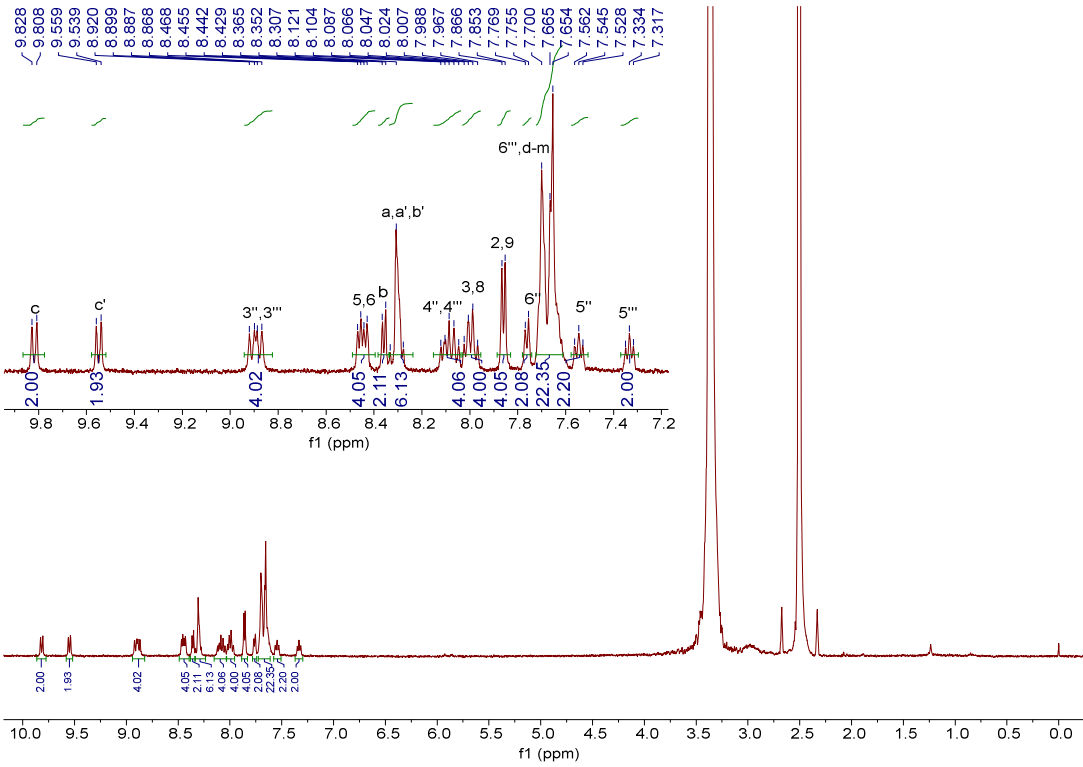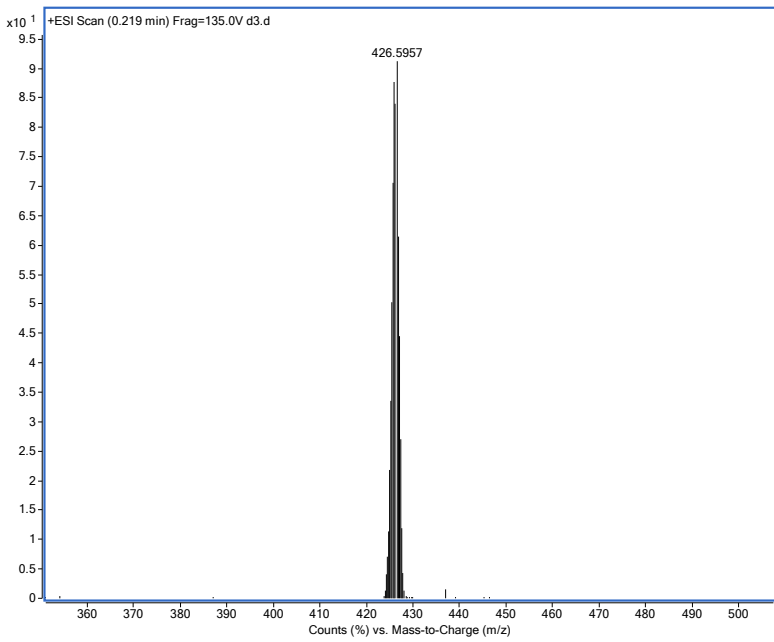

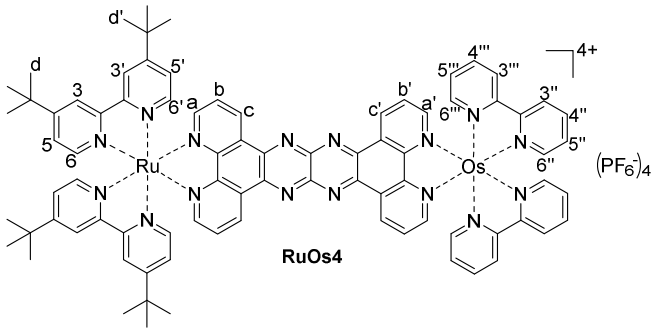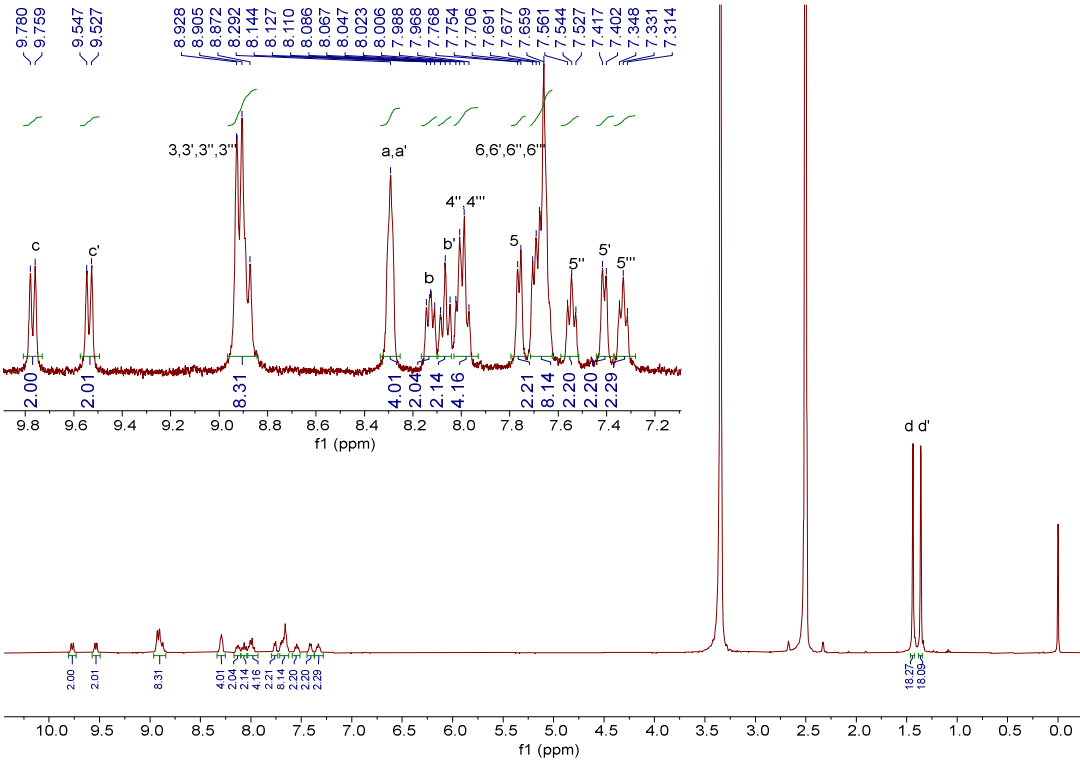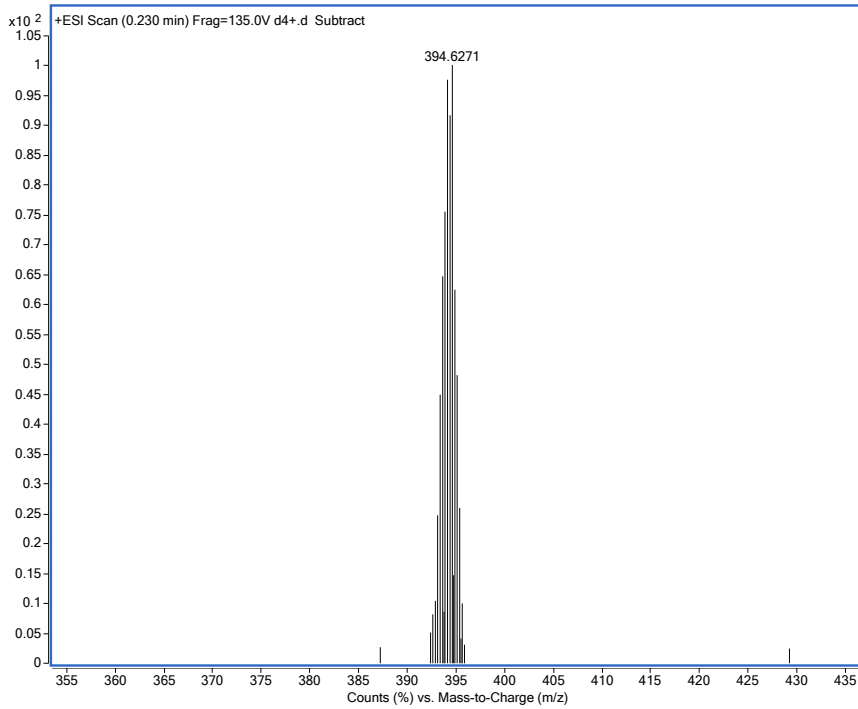



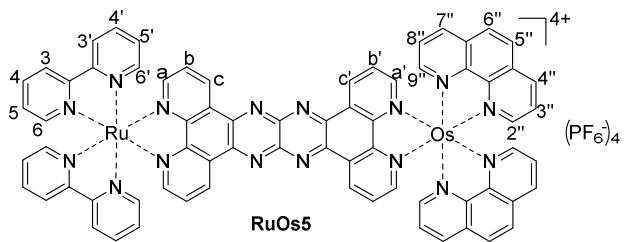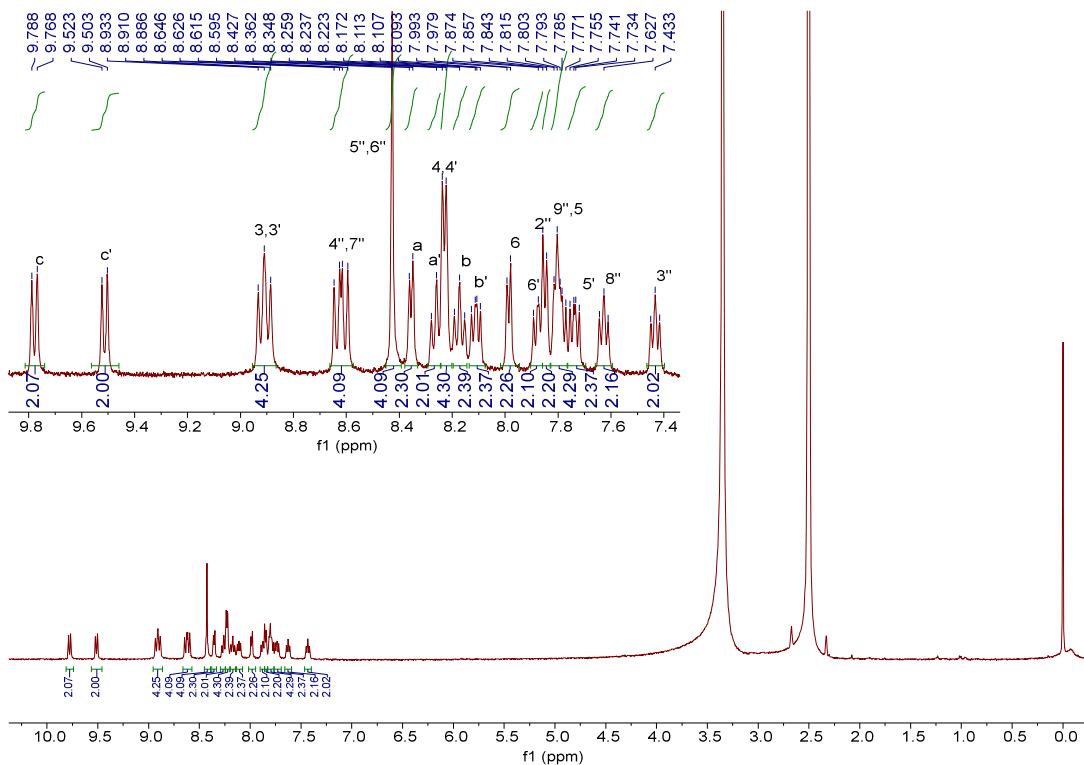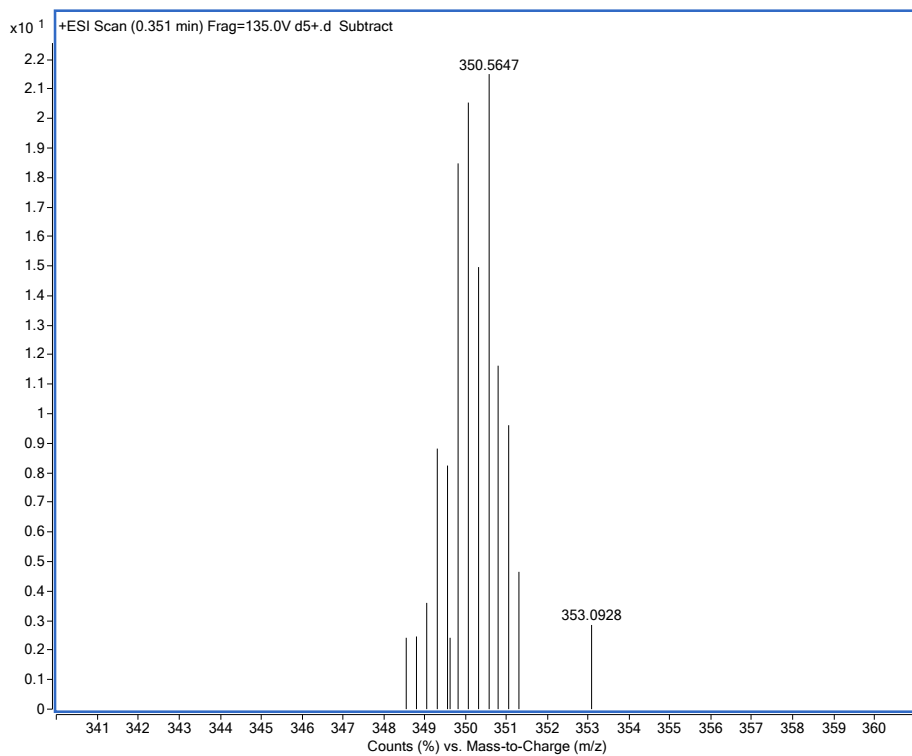

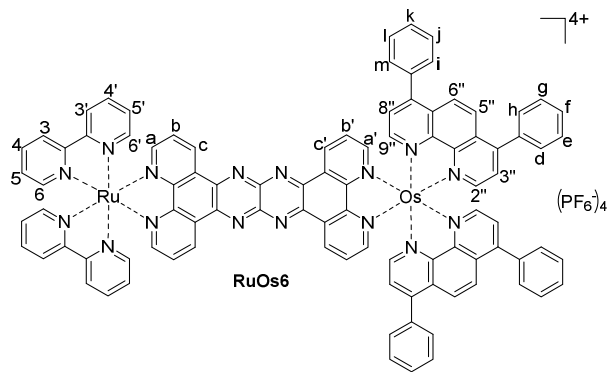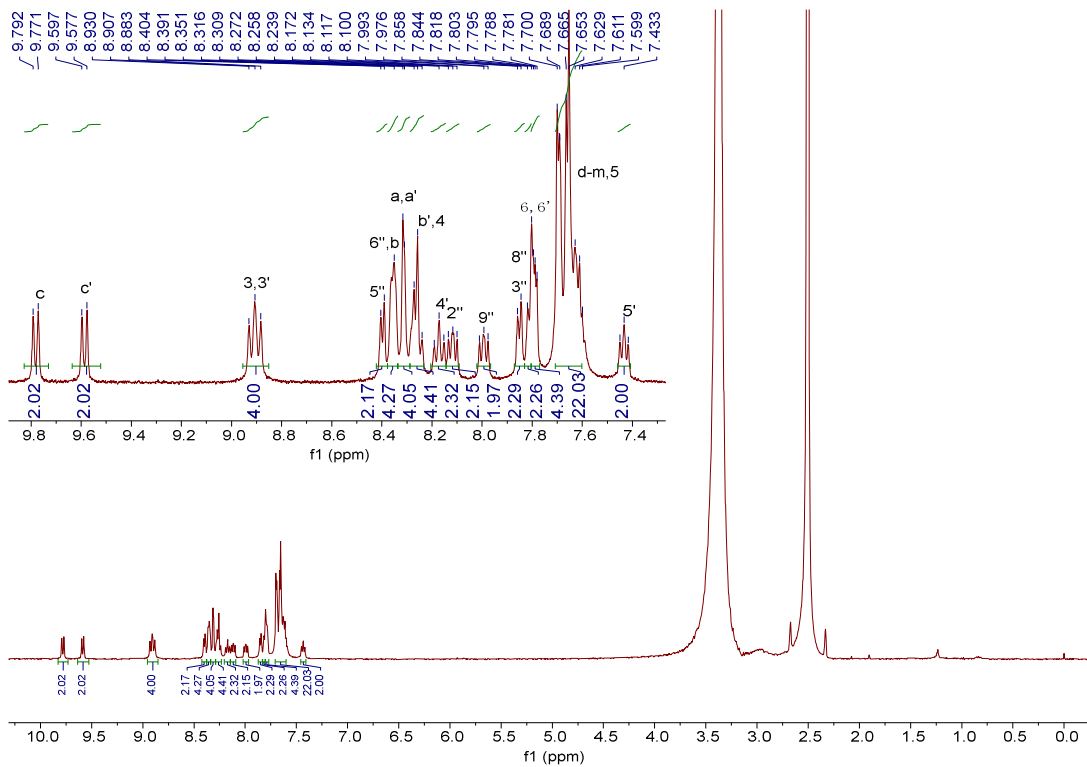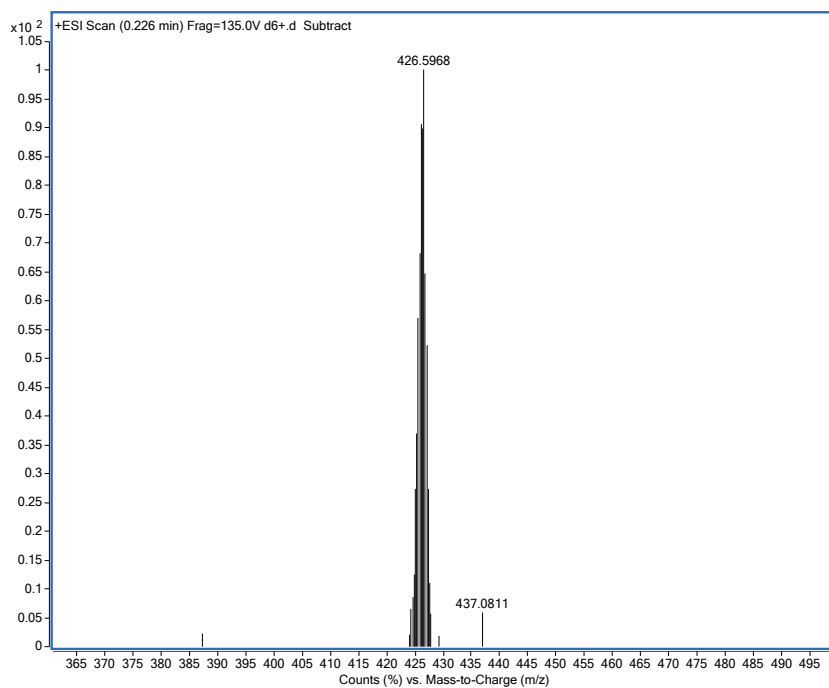

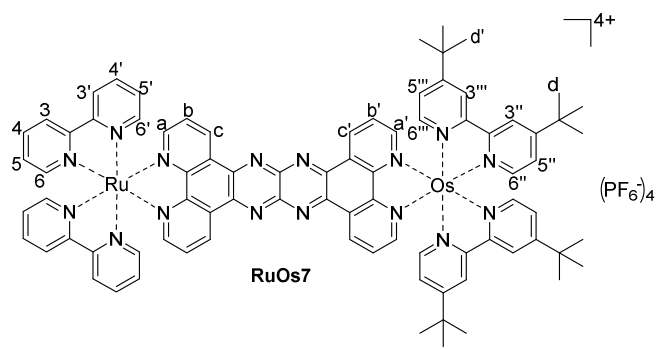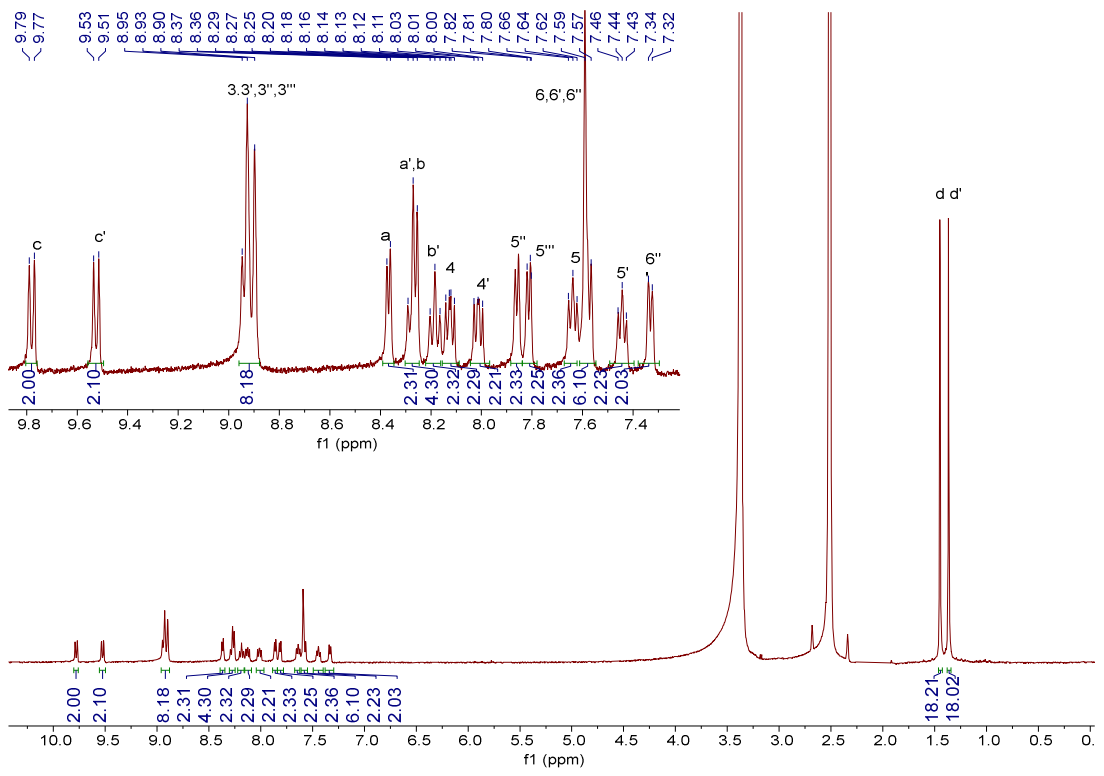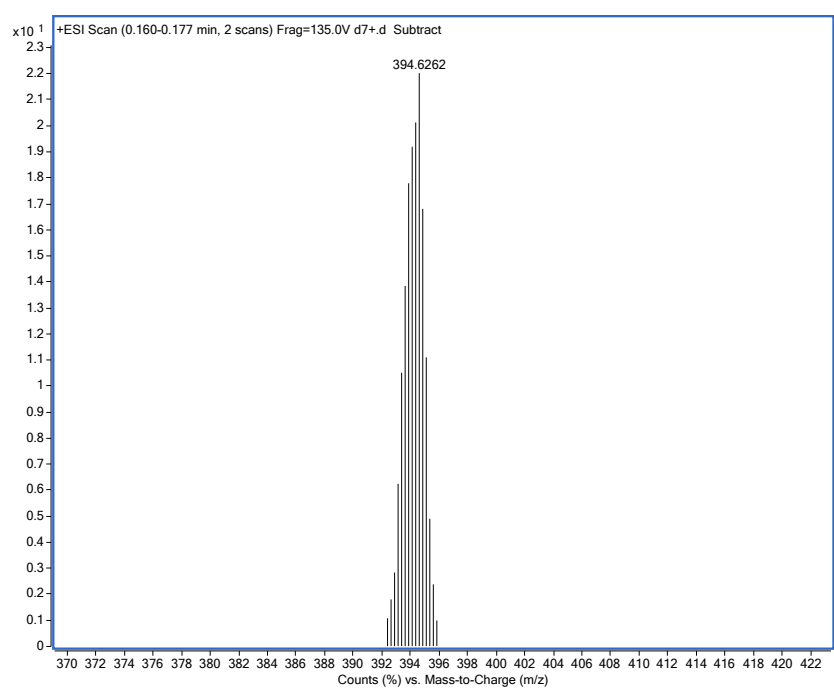

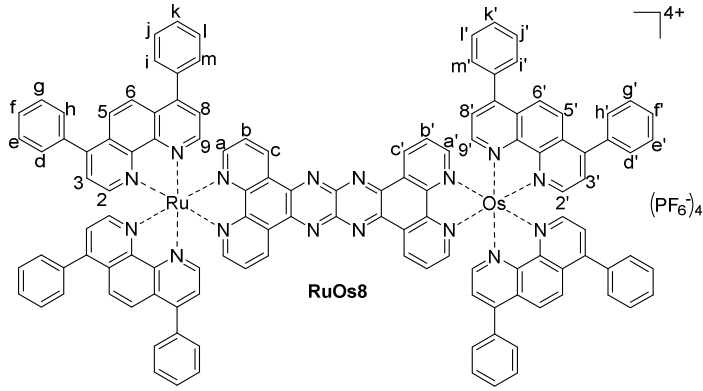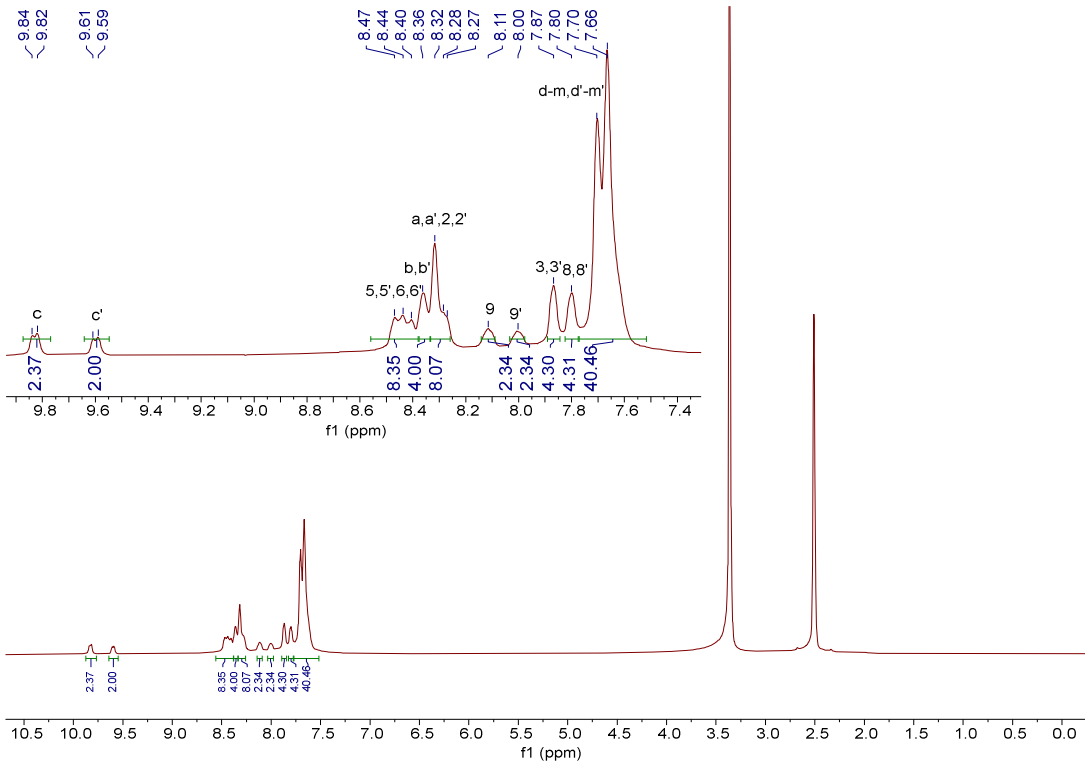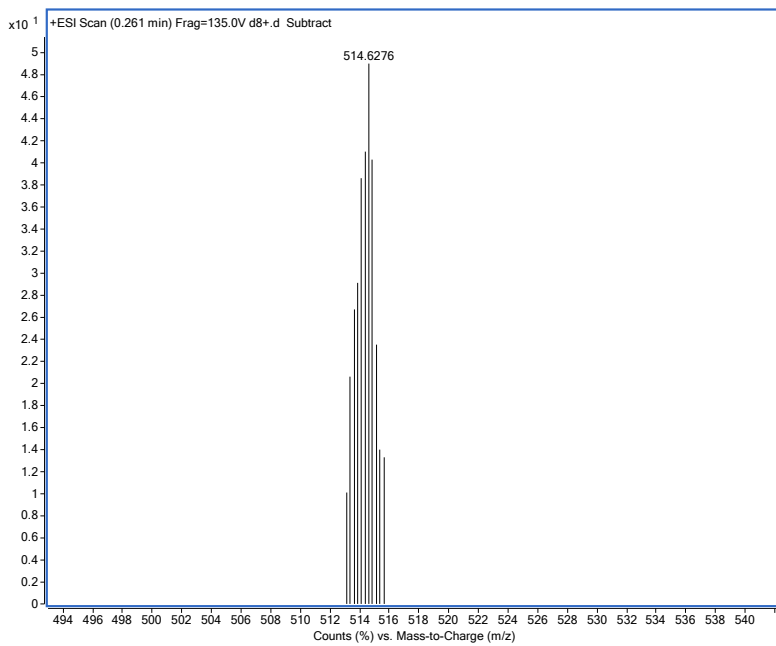

### $^{13}\text{C}$ NMR spectra of RuOs1–8

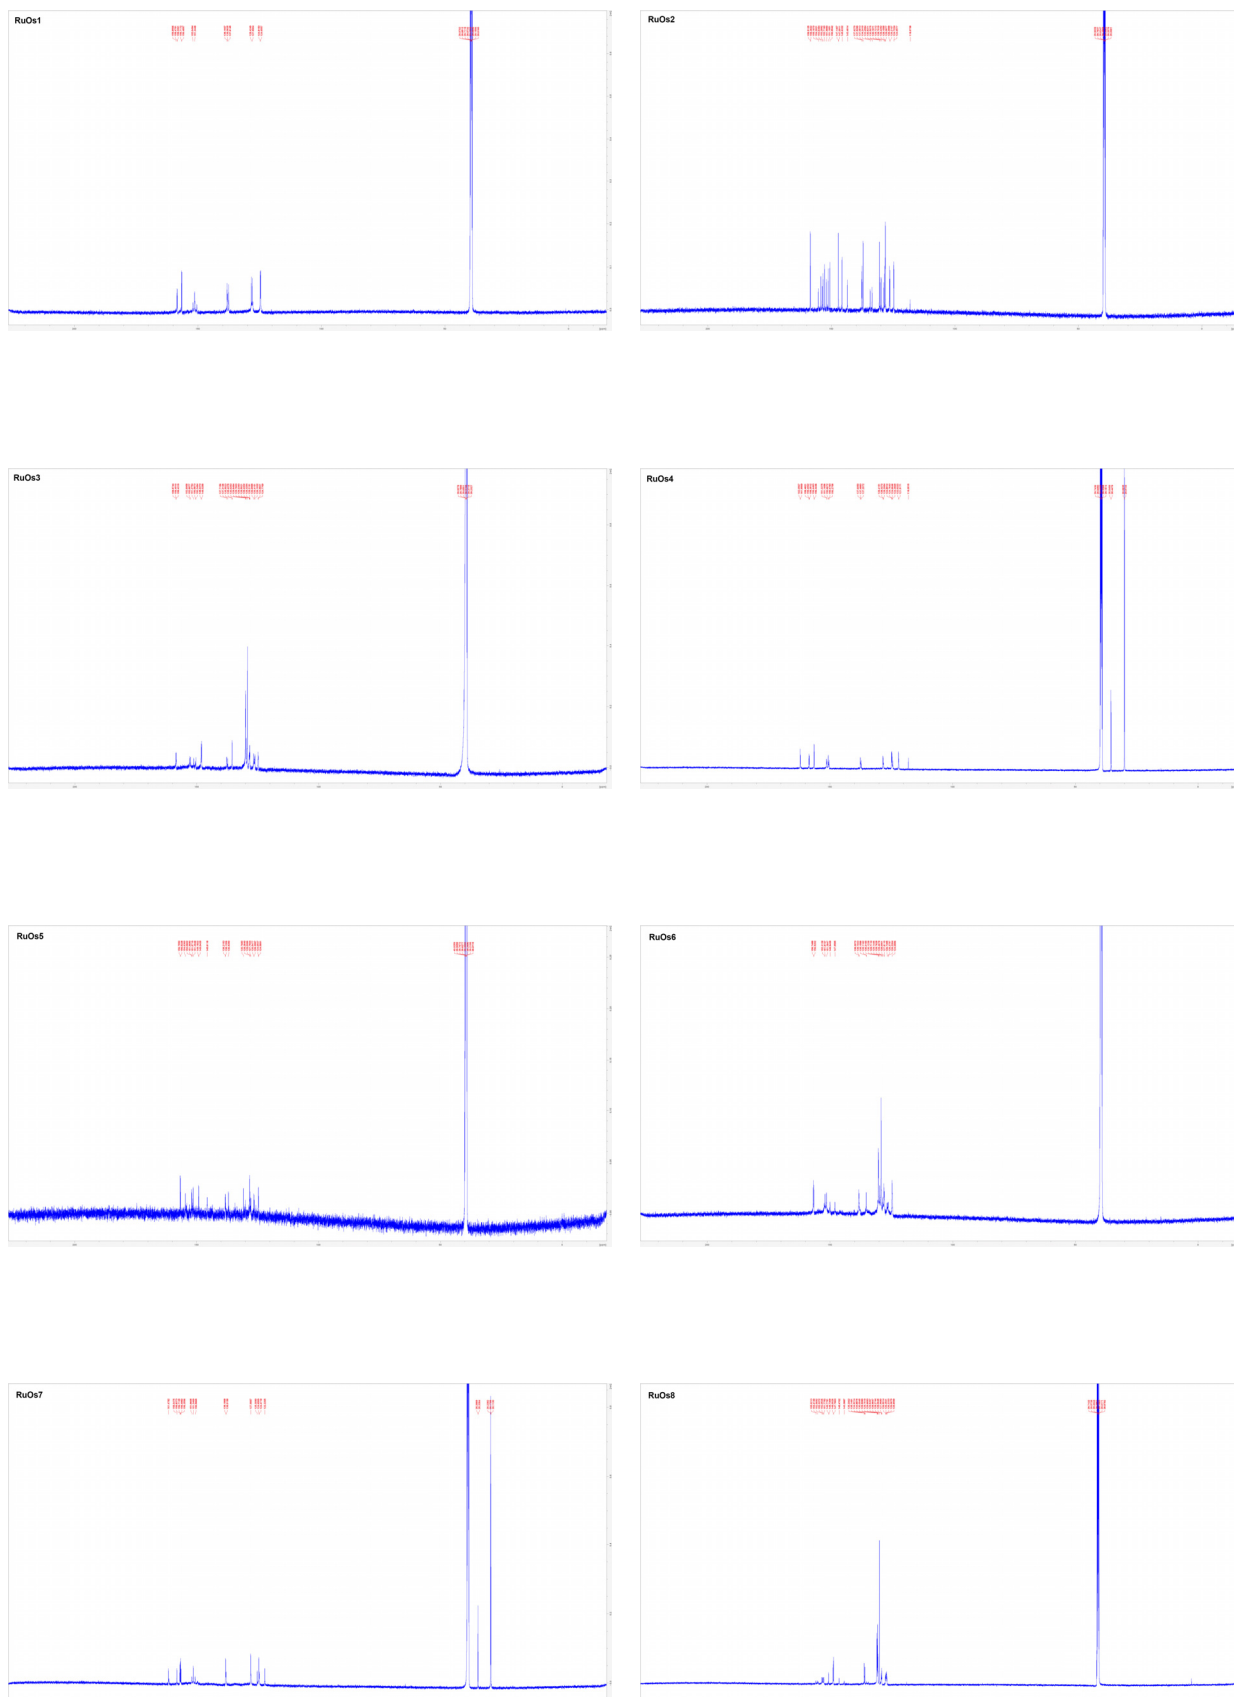

## FT-IR spectra of RuOs1-8

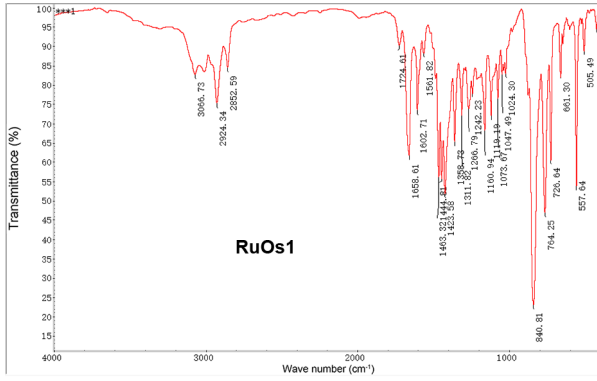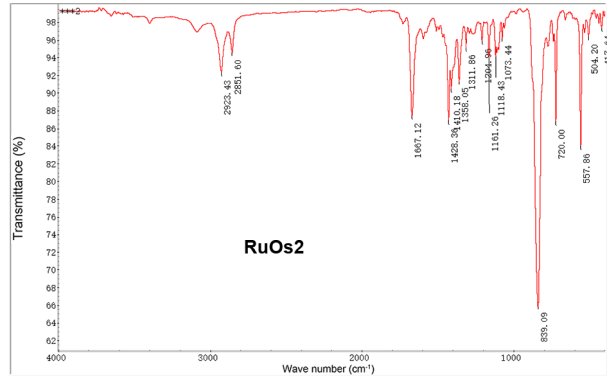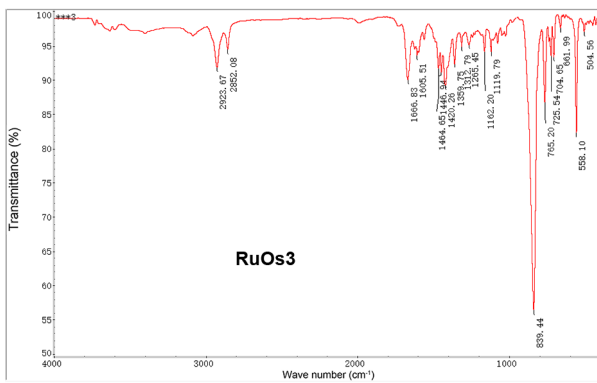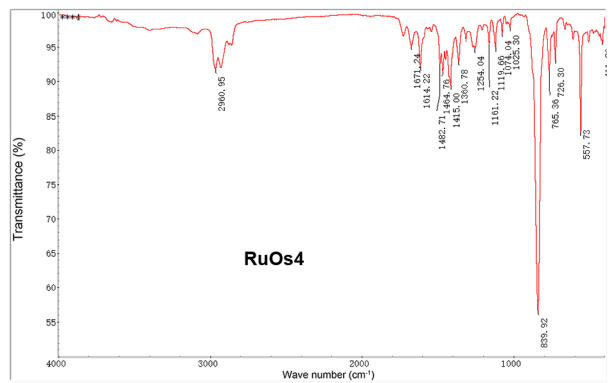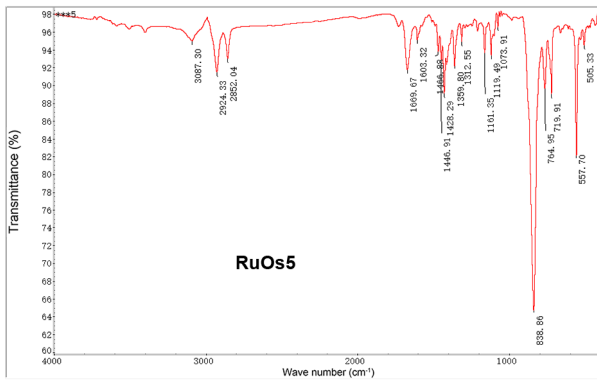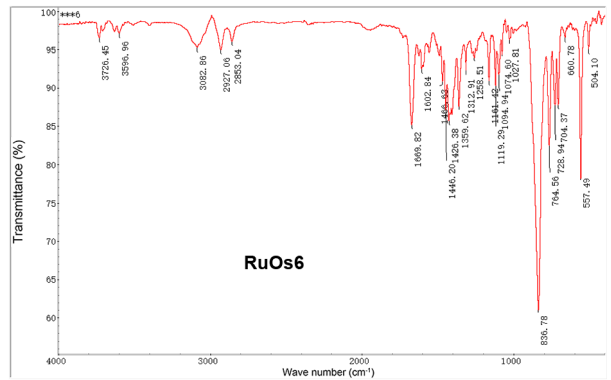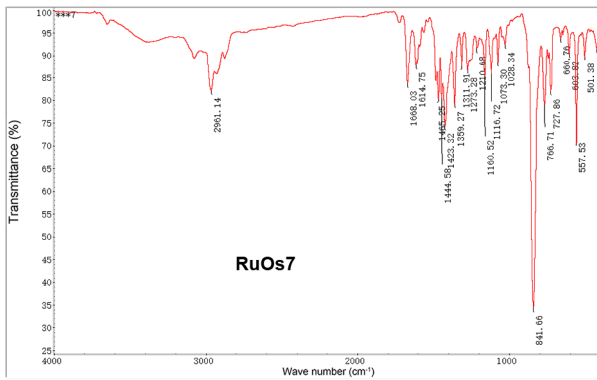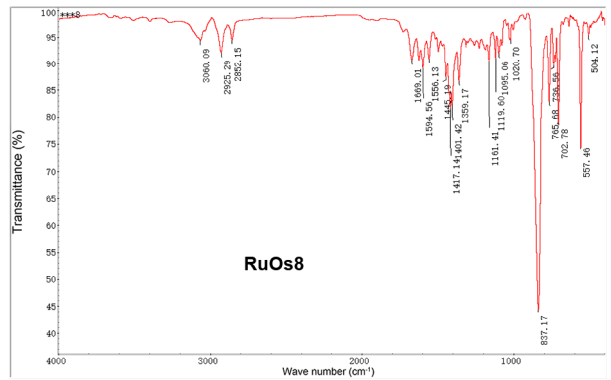

### HPLC chromatograms of RuOs1-8

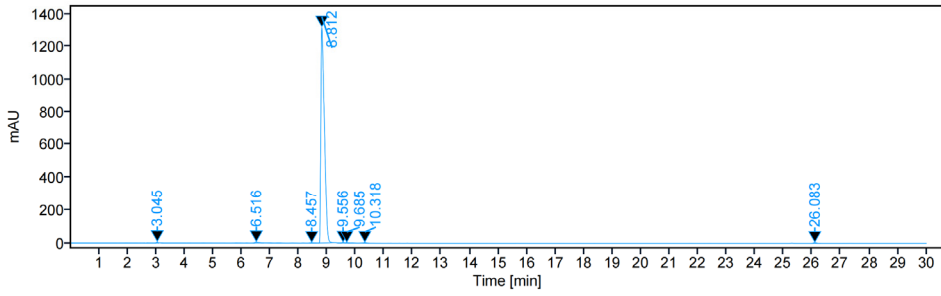

#### RuOs1

| RT [min] | Type | Width [min] | Area       | Height    | Area%   | Name |
|----------|------|-------------|------------|-----------|---------|------|
| 3.045    | BV   | 0.1110      | 19.3049    | 6.2943    | 0.1673  |      |
| 6.516    | BB   | 0.3900      | 48.4955    | 5.3512    | 0.4204  |      |
| 8.457    | BB   | 0.2633      | 10.4697    | 1.6799    | 0.0908  |      |
| 8.812    | BB   | 0.5200      | 11388.8597 | 1318.2644 | 98.7237 |      |
| 9.556    | BV R | 0.3325      | 20.7475    | 2.9988    | 0.1798  |      |
| 9.685    | VB T | 0.1553      | 6.4599     | 1.2390    | 0.0560  |      |
| 10.318   | BB   | 0.2433      | 15.3765    | 2.8995    | 0.1333  |      |
| 26.083   | BB   | 0.3433      | 26.3761    | 3.2513    | 0.2286  |      |
| Sum      |      |             | 11536.0898 |           |         |      |

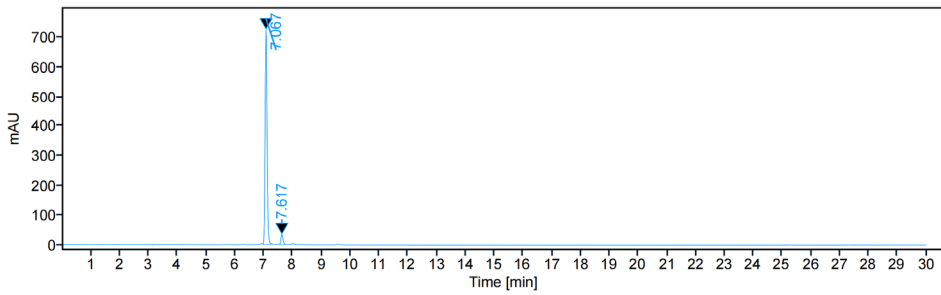

#### RuOs2

| RT [min] | Type | Width [min] | Area      | Height   | Area%   | Name |
|----------|------|-------------|-----------|----------|---------|------|
| 7.067    | BB   | 0.2733      | 3445.5503 | 726.6991 | 95.0768 |      |
| 7.617    | BB   | 0.2258      | 178.4134  | 34.0174  | 4.9232  |      |
| Sum      |      |             | 3623.9637 |          |         |      |

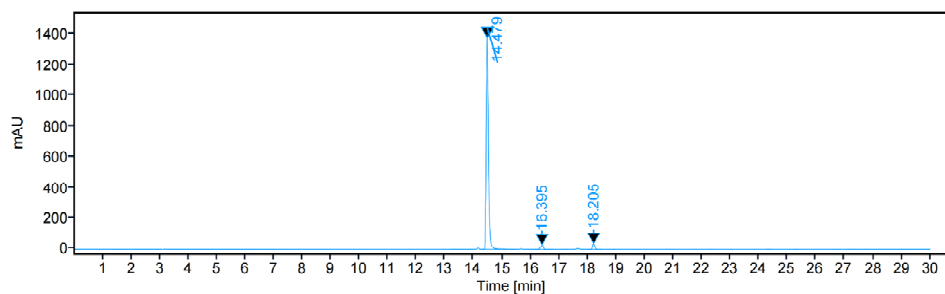

**RuOs3**

| RT [min] | Type | Width [min] | Area      | Height    | Area%   | Name |
|----------|------|-------------|-----------|-----------|---------|------|
| 14.479   | BB   | 1.2006      | 7466.0061 | 1370.2811 | 95.8081 |      |
| 16.395   | BB   | 0.6593      | 161.6066  | 22.8348   | 2.0738  |      |
| 18.205   | BB   | 0.5400      | 165.0509  | 30.9519   | 2.1180  |      |
| Sum      |      |             | 7792.6636 |           |         |      |

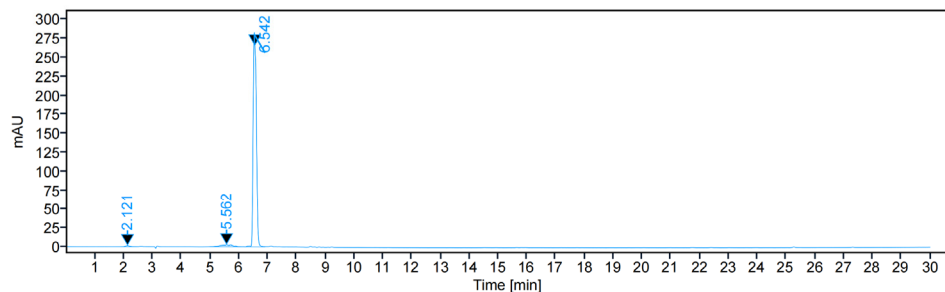

**RuOs4**

| RT [min] | Type | Width [min] | Area      | Height   | Area%   | Name |
|----------|------|-------------|-----------|----------|---------|------|
| 2.121    | BB   | 0.5601      | 19.5612   | 1.6112   | 0.8388  |      |
| 5.562    | BV X | 1.0867      | 80.1480   | 2.7387   | 3.4369  |      |
| 6.542    | VB R | 1.9170      | 2232.2895 | 265.6059 | 95.7243 |      |
| Sum      |      |             | 2331.9987 |          |         |      |

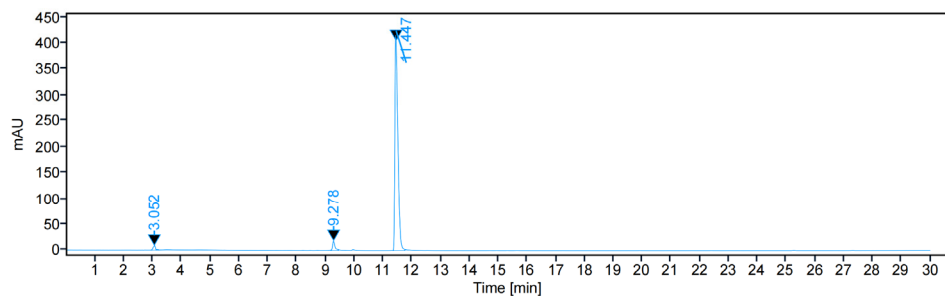

**RuOs5**

| RT [min] | Type | Width [min] | Area      | Height   | Area%   | Name |
|----------|------|-------------|-----------|----------|---------|------|
| 3.052    | BB   | 0.3347      | 51.9143   | 7.9920   | 1.6439  |      |
| 9.278    | BB   | 0.2892      | 105.2132  | 17.6188  | 3.3317  |      |
| 11.447   | BB   | 0.4257      | 3000.8411 | 404.2573 | 95.0244 |      |
| Sum      |      |             | 3157.9686 |          |         |      |



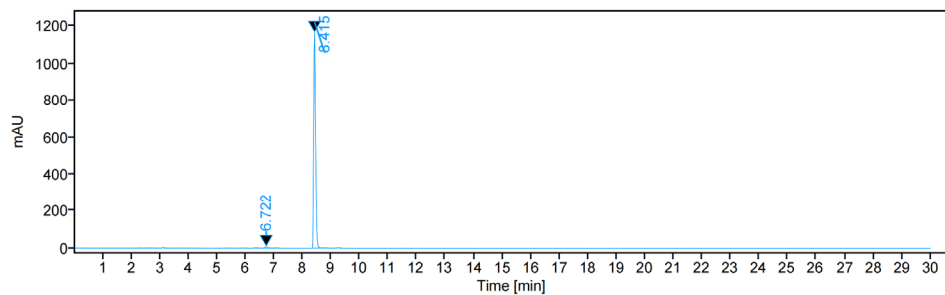

**RuOs6**

| RT [min] Type | Width [min] | Area      | Height    | Area% Name |
|---------------|-------------|-----------|-----------|------------|
| 6.722 BB      | 0.3205      | 54.2637   | 8.5694    | 1.0046     |
| 8.415 BB      | 0.2800      | 5347.2275 | 1168.1857 | 98.9954    |
| Sum           |             | 5401.4911 |           |            |

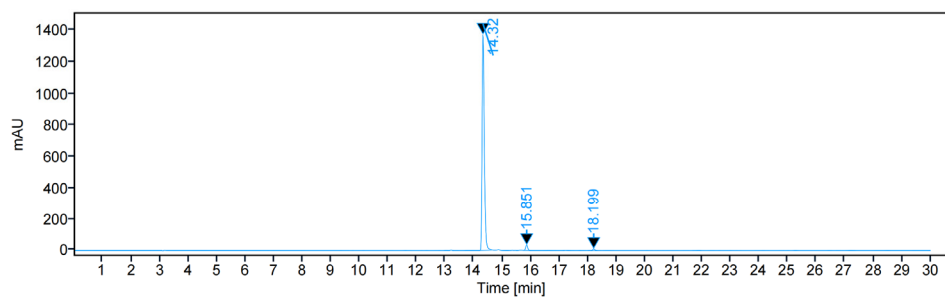

**RuOs7**

| RT [min] Type | Width [min] | Area      | Height    | Area% Name |
|---------------|-------------|-----------|-----------|------------|
| 14.320 BB     | 0.3933      | 7405.0707 | 1373.9086 | 97.1849    |
| 15.851 BB     | 0.2178      | 162.2294  | 33.8685   | 2.1291     |
| 18.199 BB     | 0.2119      | 52.2652   | 10.7606   | 0.6859     |
| Sum           |             | 7619.5654 |           |            |

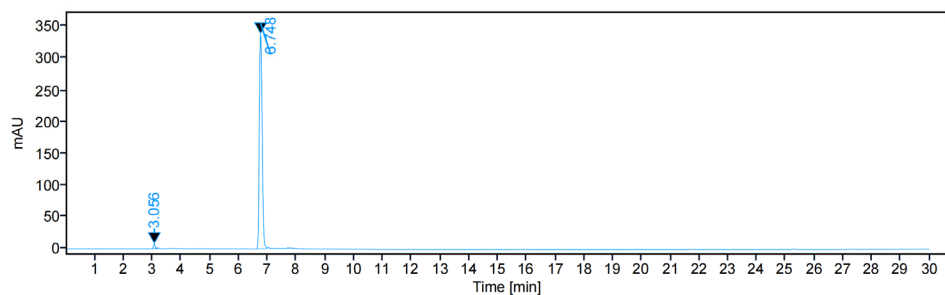

**RuOs8**

| RT [min] Type | Width [min] | Area      | Height   | Area% Name |
|---------------|-------------|-----------|----------|------------|
| 3.056 BB      | 0.1783      | 29.0270   | 7.6015   | 1.2349     |
| 6.748 BB      | 0.3478      | 2321.5091 | 337.9494 | 98.7651    |
| Sum           |             | 2350.5361 |          |            |

## 4. Experimental Procedures

### 4.1. DFT Calculations

The density functional theory (DFT) calculations were carried out with the Gaussian16 quantum chemistry program package.<sup>5</sup> MN15,<sup>6</sup> a Kohn–Sham global-hybrid exchange–correlation density functional with simultaneous accuracy for photochemistry application, was selected because the theoretical data calculated by this functional were much closer to the experimental data than the other tested density functions, such as Becke’s three-parameter hybrid functional (B3LYP), CAM-B3LYP,<sup>7</sup> global-hybrid meta-GGA (generalized gradient approximation) M06,<sup>8</sup> and MN15-L.<sup>9</sup> For the same reason, LanL2DZ basis set (a double-zeta basis set containing effective core potential) for all atoms was selected from a number of benchmarks, including SDD (Stuttgart/Dresden effective core potential) for all atoms, def2TZVP (Coulomb-fitting basis set) for all atoms, LanL2DZ for Os and Ru/6-31G(d) for the others, LanL2DZ for Os and Ru/6-311G(d,p) for the others, SDD for Os and Ru/6-31G(d) for the others, and SDD for Os and Ru/6-311G(d,p) for the others. DFT-D3 dispersion correction<sup>10</sup> containing Becke–Johnson (BJ) damping<sup>11</sup> was used in all calculations to improve accuracy. The full geometry optimization was carried out for the heteronuclear complexes in aqueous solution, using the conductor polarized continuum model (CPCM)<sup>12</sup>. The stability of the optimized conformation of the heteronuclear complexes was confirmed by the frequency analysis, which shows no imaginary frequency for each energy minimum. For absorption spectral calculations, 80 lowest singlet excited states (ESs) were calculated using the analytical time-dependent DFT (TDDFT) theory to reproduce the experimental spectra. The discrete optical transitions with their corresponding oscillator strength were broadened by a Gaussian function with the full width at half maxima (FWHM) of 2200 cm<sup>-1</sup> to represent an experimental inhomogeneous spectral broadening. For fluorescence emission spectral calculations, the lowest singlet excited states (S1) were structurally optimized for the lowest 10 states and the theoretical emission spectra were generated as described for absorption spectra above with FWHM of 0.2 eV. The structures of the excited triplet states were also optimized to reveal their transition properties. A compact representation of an ES *via* photoexcited hole–electron pair, which fits for chemical intuition, can be obtained using natural transition orbital (NTO) analysis.<sup>13</sup> By performing NTO calculations, a hole–electron pair transition from a ground state to an ES could be realized through unitary transformation of transition density matrix. NTO pairs contributing to the most important optical transitions were visualized for plotting excited charge densities (isovalue = 0.02).

## 4.2. Singlet oxygen (<sup>1</sup>O<sub>2</sub>) Quantum Yields

The <sup>1</sup>O<sub>2</sub> quantum yields of **RuOs1–8** have been measured according to the reported method using 9,10-anthracenediyl-bis(methylene)dimalonic acid (ABDA) as an <sup>1</sup>O<sub>2</sub> indicator.<sup>3</sup> The absorbance of ABDA was adjusted to 0.4 at 378 nm in air-saturated water, and the absorbance of the heteronuclear complex was adjusted to 0.1 at 400 nm. The photo-oxidation of ABDA was monitored at certain intervals under irradiation at 400 nm (LED), 450 nm (LED) and 808 nm (LPL) with external air-cooling devices. The irradiances of LED array light sources were measured by an optical power meter (PM100D, Thorlabs) equipped with a thermal power sensor (S425C, Thorlabs), using the standard 5-point method, and unified to 50 mW cm<sup>-2</sup> by adjusting the distance between light source and sample. The power of 808 nm LPL was modified by a tunable controller, until the output irradiance reached 100 mW cm<sup>-2</sup>, as indicated by the optical power meter. The <sup>1</sup>O<sub>2</sub> generation rates were measured and calculated by the following method. The light intensity (*I*, einstein s<sup>-1</sup>) of a light source with a power *P* (W) and a wavelength *λ* (nm) can be calculated as follows<sup>14</sup>:

$$I \text{ (einstein s}^{-1}\text{)} = P \text{ (W)} \times \lambda \text{ (nm)} \times 8359 \times 10^{-9} \quad (\text{Eq 1})$$

Therefore, the photon flux (photons obtained by the test compound at one time interval) can be calculated by the *I* reduction ( $\Delta I$ ) after sample penetration (light absorption). The aqueous solution **Ir1–6** or [Ru(bpy)<sub>3</sub>]<sup>2+</sup> (2.5 mL, 1 mM) was put into the standard cuvette. Optical powers in the front (*P<sub>f</sub>*) and back (*P<sub>b</sub>*) of the cuvette toward the light irradiation were measured respectively. Water was used as blank to obtain *P<sub>f,0</sub>* and *P<sub>b,0</sub>*, so as to eliminate the possible influence of light scattering. The optical power decrease ( $\Delta P$ ) caused by light absorption of the test compound was expressed as  $\Delta P = (P_f - P_b) - (P_{f,0} - P_{b,0})$ . The  $\Delta P$  of the test heteronuclear complex at the concentration *C<sub>M</sub>* (mM) used in ABDA experiment was calculated as:

$$\Delta P_M = \Delta P \times C_M / 1 \text{ mM} \quad (\text{Eq 2})$$

$$\Delta I \text{ (einstein min}^{-1}\text{)} = \Delta P_M \text{ (W)} \times \lambda \text{ (nm)} \times 5.0154 \times 10^{-4} \quad (\text{Eq 3})$$

The <sup>1</sup>O<sub>2</sub> generation rate (per minute) was obtained by the slope (*Slope*) of a linear fit of  $\Delta OD$  (absorbance of ABDA at 378 nm) versus time (min). The molar extinction coefficient of ABDA ( $\epsilon_{ABDA}$ ) in aqueous solution at 378 nm was tested to be 12000. The <sup>1</sup>O<sub>2</sub> quantum yield ( $\Phi_{\Delta,\lambda}$ ) at a wavelength *λ* (nm) can be calculated as follows:

$$\begin{aligned} \Phi_{\Delta,\lambda} &= \frac{\text{moles of } ^1\text{O}_2 \text{ generated per minute}}{\text{moles of photons absorbed per minute}} = \frac{2.5 \times 10^{-3} \times \text{Slope}}{\Delta P_M \text{ (W)} \times \lambda \text{ (nm)} \times 5.0154 \times 10^{-4} \times \epsilon_{ABDA}} \\ &= \frac{0.0004154 \times \text{Slope}}{\Delta P_M \text{ (W)} \times \lambda \text{ (nm)}} \quad (\text{Eq 4}) \end{aligned}$$

The maximum permissible measurement uncertainty is 5%. The calculated  $\Phi_{\Delta}$  for  $[\text{Ru}(\text{bpy})_3](\text{PF}_6)_2$  (0.392) is very close to the reported value (0.42).<sup>15</sup>

### 4.3. Two-photon Absorption Cross-Section (TPACS)

TPACSs of **RuOs1–8** (50  $\mu\text{M}$ ) in dry THF (water  $\leq$  30 ppm by Karl Fischer) were measured by the well-established method involving two-photon-induced fluorescence.<sup>16</sup> Two-photon photoluminescence were recorded on a SpectroPro300i instrument, and the pump laser beam came from a Ti:sapphire laser system (pulse duration, 200 fs; repetition rate, 76 MHz; Coherent Mira900-D).

### 4.4. Determination of oil/water distribution coefficient ( $\log K_{O/W}$ )

Aqueous solution of heteronuclear complex (5 mL, 100  $\mu\text{M}$ ) was mixed thoroughly with *n*-octanol (5 mL) in a 15 mL centrifuge tube. The tube was wrapped in aluminium foil, shaken for 24 h in a thermostatic shaker incubator and allowed to settle until the two phases were completely separated. The oil/water distribution coefficients ( $\log K_{O/W}$ ) were calculated using the relative concentrations of complex in the two phases.<sup>3, 17</sup> For absorbance below 0.002, it is used as  $< 0.002$  for  $\log P_{O/W}$  calculation. The error of  $\log K_{O/W}$  is  $\pm 0.04$ .

### 4.5. Photothermal Conversion Efficiency (PCE)

The temperature changes of **RuOs1–8** aqueous solution (1 mL) in different concentrations (10, 50 and 100  $\mu\text{M}$ ) under 808 nm LPL (100  $\text{mW cm}^{-2}$ ) irradiation were monitored using an IR camera for living body (HIKvision). The photothermal conversion efficiencies ( $\eta_{808}$ ) of heteronuclear complexes were calculated as described in the literature.<sup>3, 18</sup> The formula is listed below:

$$\eta = \frac{h S (T_{\max} - T_{\text{surr}}) - Q_{\text{Dis}}}{I(1-10^{-A_{\lambda}})} \quad (\text{Eq 5})$$

where  $\eta$  is PCE,  $h$  represents heat-transfer coefficient,  $S$  represents the surface area of the container,  $T_{\max}$  represents the equilibrium temperature (the highest temperature the sample can reach with a laser irradiation),  $T_{\text{surr}}$  represents the surrounding temperature,  $Q_{\text{Dis}}$  is the baseline energy input of the sample cell,  $A_{\lambda}$  is the absorbance of compound at  $\lambda$  of the excitation wavelength and  $I$  is the power of excitation laser.

### 4.6. Cell line and culture conditions

Human malignant melanoma A375 cell lines and human normal liver HL-7702 cell lines (STR authentication,

Animal Research and Resource Center) were cultured in Roswell Park Memorial Institute 1640 medium (RPMI 1640, Adamas Life) Human normal kidney HK-2 cell lines were grown Dulbecco's modified Eagle medium/nutrient mixture (DMEM-F12, Gibco). Human lung adenocarcinoma A549 and cisplatin-resistant A549 (A549R) cell lines were cultured in high glucose Dulbecco's Modified Eagle's Medium (DMEM, Gibco). All mediums were supplemented with 10% (v/v) fetal bovine serum (FBS, Gibco), 100 units/mL penicillin and 100 mg/mL streptomycin (Sangon). All cell lines were maintained at 37 °C in a CO<sub>2</sub> incubator with a humidified atmosphere (95% air and 5% CO<sub>2</sub>). The cells were routinely subcultured when reached about 80% confluency by trypsin-EDTA treatment. The cells in an exponential growth phase were harvested and counted for tumor inoculation.

#### **4.7. Subcellular Colocalization by Confocal Laser Scanning Microscopy**

Human malignant melanoma cells A375 were grown on 8-Chamber Glass Slide (Thermo Scientific) at a density of  $6 \times 10^4$  cell/ml and incubated for 1 h with the heteronuclear complexes at 2.5  $\mu$ M. The cells were washed with PBS twice. Nuclei and mitochondria were counterstained with Hoechst 33342 (Invitrogen) and MitoTracker Green (MTG, Invitrogen), respectively. Fluorescence images were collected on a Leica TCS SP8 DIVE two-photon confocal laser scanning microscope (CLSM) at three detection channels (MTG:  $\lambda_{\text{ex}} = 488$  nm,  $\lambda_{\text{em}} = 510\text{--}520$  nm; Heteronuclear complex:  $\lambda_{\text{ex}} = 808$  nm,  $\lambda_{\text{em}} = 610\text{--}630$  nm; Hoechst:  $\lambda_{\text{ex}} = 405$  nm,  $\lambda_{\text{em}} = 460\text{--}500$  nm) and processed by LAS X (Leica) software.

#### **4.8. Cell Uptake and Endocytic Pathways**

Exponentially growing A375, A549 and A549R cells ( $2 \times 10^7$  cell ml<sup>-1</sup>) were harvested, and the resulting single-cell suspension was plated into 100 mm tissue culture plates (Adamas). After 24 h of incubation (37 °C, 5% CO<sub>2</sub>), the cells were incubated with **RuOs6** (5  $\mu$ M) for 2 h at 37 °C in RPMI 1640 medium with 10% (v/v) FBS. The cells were rinsed with PBS, detached with trypsin, counted and divided into three portions: (1) in portion 1, the nuclei were extracted using a nucleus extraction kit (Thermo); (2) in portion 2, the cytoplasm was extracted using a cytoplasm extraction kit (Thermo); (3) in portion 3, the mitochondria were extracted using a mitochondrial extraction kit (Thermo). All extraction procedures followed the manufacturer's protocols. The samples were digested with 60% HNO<sub>3</sub> at room temperature for one day. Each sample was diluted with water to obtain 2% HNO<sub>3</sub> sample solutions. The Ru and Os contents were quantified using the corresponding ruthenium

and osmium ICP standard (Supelco, Merck) on a PlasmaQuant PQ9000 inductively coupled plasma mass spectrometry (ICP-MS).

For the endocytic pathways study, A375, A549 and A549R cells were plated in 6-well plates at a density of  $2.0 \times 10^5$  cells per well and incubated overnight in the RPMI 1640 culture medium containing 10% FBS. Chlorpromazine (CPZ,  $10.0 \mu\text{g mL}^{-1}$ ), amiloride ( $100.0 \mu\text{g mL}^{-1}$ ) or nystatin ( $50.0 \mu\text{g mL}^{-1}$ ) was added and further incubated at  $37^\circ\text{C}$  or  $4^\circ\text{C}$  for 1 h. Then, **RuOs6** ( $10.0 \mu\text{M}$ ) was added. After 4 h of incubation, all wells were washed with PBS three times, and then the cells were collected by treatment with 0.5 mL trypsin. The counted cells were suspended in 1.0 mL PBS and lysed by ultrasonication. Methanol (3 mL) was added to each sample to extract the complexes. The internalized **RuOs6** amount was measured using a fluorescence spectrophotometer.<sup>19</sup>

#### 4.9. In vitro Cell Viability Test (CCK-8 Assay)

The cell viability was determined by the CCK-8 assay. For cytotoxicity to A375, A549, and A549R cells, exponentially grown cells were seeded in 96-well plates, followed by a 24-hour incubation for attachment. Cells were incubated with different concentrations of heteronuclear complex or cisplatin (CP). For phototoxicity studies, after 12 h of incubation, supernatant was replaced with fresh culture medium and cells were subjected to irradiation by the 808 nm LPL ( $100 \text{ mW cm}^{-2}$ , light dose =  $30.0 \text{ J cm}^{-2}$ ), and incubated for an additional 48 h. Cells without irradiation were replaced with fresh culture medium and maintained in the dark. Then  $10 \mu\text{L}$  of CCK-8 (Adamas Life) working solution was added and incubated for 1 h. Absorbance at 450 nm was measured on a microplate reader (iMark, Bio-rad), before and after CCK-8 incubation.  $\text{IC}_{50}$  values were determined by plotting the percentage of viability versus concentration on a logarithmic graph. For cytotoxicity to normal cells, exponentially grown HL-7702 and HK-2 cells were used instead. The cell viabilities in the presence of different concentrations of **RuOs6** and CP were measured by the same CCK-8 protocol. All data were reported as the mean  $\pm$  standard deviation ( $n = 3$ ).

#### 4.10. Flow Cytometry Analysis

Cell apoptosis were measured by Annexin V-FITC (fluorescein isothiocyanate, AV) and propidium iodide (PI) based on the manufacturer's guide (Beyotime). Complex-treated human melanoma cells A375 at a density of  $1 \times 10^5 \text{ cell mL}^{-1}$  in 1 mL of RPMI 1640 medium containing 10% FBS and  $1 \times 10^3$  units penicillin/streptomycin were incubated at  $37^\circ\text{C}$  (5%  $\text{CO}_2$ ) for 2 h. The complex-containing medium were replaced with fresh RPMI

1640 medium. Cells were irradiated by the 808 nm LPL ( $100 \text{ mW cm}^{-2}$ , light dose =  $30.0 \text{ J cm}^{-2}$ ) or kept away from light, stained with AV and PI, and examined immediately with a BD FACSCalibur flow cytometer.

#### 4.11. Caspase-3 and -9 Activation

Caspase-3 and -9 activities were measured through cleavage of a colorless substrate specific for caspase-3 (Ac-DEVD-*p*NA) or caspase-9 (Ac-LEHD-*p*NA) releasing *p*-nitroaniline (*p*NA). A375 cells were seeded in 96-well plates ( $1 \times 10^5$  cells/well) and allowed to incubate for 6 h. The cells were then incubated respectively with control (PBS) or heteronuclear complex in the dark. After 12 h incubation, the cells were divided into two groups. The dark groups were incubated for an additional 12 h, and the irradiation groups were exposed to laser irradiation ( $100 \text{ mW cm}^{-2}$ , light dose =  $30.0 \text{ J cm}^{-2}$ ) before they were incubated for 12 h in the dark. The cells were lysed and treated with caspase-3 or -9 activity kit (Beyotime) according to the manufacturer's protocol. Absorbance at 405 nm was measured on an iMark (Bio-rad) microplate reader. The caspase-3 and -9 activities in drug-treated cells were determined as relative values to control groups (PBS). Data were reported as the mean  $\pm$  standard deviation ( $n = 3$ ). To reveal the effect of PDT and PTT, caspase activities of **RuOs6**-incubated A375 cells were further examined in the presence of 1.0 mM Asc (**RuOs6**+Asc) and on an ice bath (**RuOs6**+Ice) during laser irradiation.

#### 4.12. In vivo Dual Photodynamic and Photothermal Therapy (PDT/PTT) and Residue Detection

Animal experiments for A375 and A549R tumor cells were reviewed and approved by the Institutional Animal Care and Use Committee (IACUC) at Yunnan University, Kunming, China (Approval No: YNU20220269 and YNU20230422).

For A375 tumor assay, BALB/c female nude mice aged 6–8 weeks (body weight 18–20 g) were purchased from GemPharmatech. The mice were kept in individually ventilated cage (IVC) systems at constant temperature (20–26 °C) and humidity (40–70%) with five animals in each cage. Each mouse was inoculated subcutaneously at the posterior right flank region with A375 tumor cells ( $5 \times 10^6$ ) in 0.1 ml of PBS for tumor development (Day 0). The drug treatments were started when the mean tumor size reached  $66 \text{ mm}^3$  (Day 10). The mice were randomly allocated into four groups (5 mice for each group): Group I, PBS injection only; Group II, PBS injection and subsequent irradiation with 808 nm LPL ( $100 \text{ mW cm}^{-2}$ , light dose =  $30.0 \text{ J cm}^{-2}$ ); Group III, **RuOs6** (20  $\mu\text{L}$ , 10  $\mu\text{M}$ ) injection only; Group 4, **RuOs6** (20  $\mu\text{L}$ , 10  $\mu\text{M}$ ) injection and subsequent irradiation with 808 nm LPL ( $100 \text{ mW cm}^{-2}$ , light dose =  $30.0 \text{ J cm}^{-2}$ ). The injection-to-irradiation lag period

is 0.5 h. The temperature changes and photothermal imaging of tumor sites were monitored using an IR camera for living body (Hikvision). The body weight and tumor volume data were recorded every 2 or 3 days in the therapeutic regimen. Tumor volumes were expressed in  $\text{mm}^3$  using the formula:  $V = 0.5 a \times b^2$ , where  $a$  and  $b$  are the long and short diameters of the tumor, respectively. Tumor weight was measured at study termination. The entire procedure of dosing, as well as tumor and bodyweight measurement, were conducted in a Laminar Flow Cabinet. The relative tumor volume is calculated by  $V/V_0$  ( $V$  is the tumor volume on the day when data were recorded,  $V_0$  is the tumor volume on the day when treatment was started). After 14 days of therapy, the survival rate of mice was 95% (Day 24). The mice were sacrificed when the mean volumes of tumor in Group I, II and III reached  $2000 \text{ mm}^3$  (Day 24), and the tumors and primary organs (heart, lung, kidney, spleen, liver, intestine and brain) were collected and separated into two halves. One half of the organs was used for eosin-hematoxylin staining, while the other half was homogenized, digested by 60% nitric acid for 24 h, and diluted with water to generate 2% nitric acid samples for ICP-MS analysis. The Ru and Os contents were expressed as picomoles of Ru and Os per gram of organ weight. The data is reported as the mean value  $\pm$  standard deviation ( $n = 5$ ). The injected Ru and Os amounts were calculated by the whole-body weights (Day 10).

For A549R tumor assay, BALB/c female nude mice aged 6–8 weeks (body weight 18–20 g) were purchased and maintained in the same conditions as described above. Each mouse was inoculated subcutaneously at the posterior right flank region with A549R tumor cells ( $5 \times 10^6$ ) in 0.1 ml of PBS for tumor development (Day 0). The drug treatments were started when the mean tumor size reached  $144 \text{ mm}^3$  (Day 41). The mice were randomly allocated into two groups (3 mice for each group): Group V, PBS injection and subsequent irradiation with 808 nm LPL ( $100 \text{ mW cm}^{-2}$ , light dose =  $30.0 \text{ J cm}^{-2}$ ); Group VI, **RuOs6** ( $20 \mu\text{L}$ ,  $10 \mu\text{M}$ ) injection and subsequent irradiation with 808 nm LPL ( $100 \text{ mW cm}^{-2}$ , light dose =  $30.0 \text{ J cm}^{-2}$ ). The injection-to-irradiation lag period is 0.5 h. The temperature changes and photothermal imaging of tumor sites were monitored using an IR camera for living body (Hikvision). The body weight and tumor volume data were recorded every 2 or 3 days in the therapeutic regimen. Tumor volumes and body weights were measured as described above. After 28 days of therapy, the survival rate of mice was 100% (Day 69). The mice were sacrificed at Day 69 and the tumors and primary organs (heart, lung, kidney, spleen, liver, intestine and brain) were collected and separated into two halves. H&E staining and residue analysis were carried out as described above. The injected Ru and Os amounts were calculated by the whole-body weights (Day 41).



## 5. Supplementary Figures

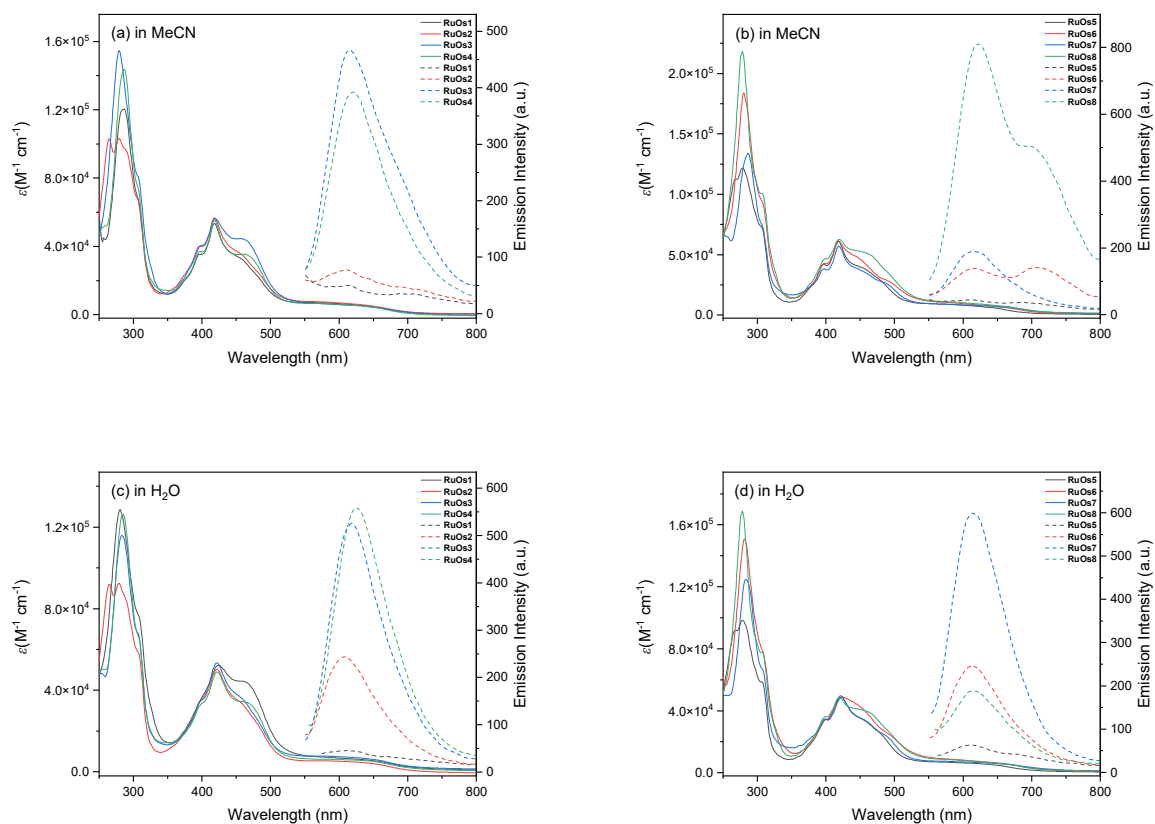

**Fig S1.** Absorption and emission spectra of **RuOs1–8** (10  $\mu$ M) in acetonitrile (MeCN, a and b) and aqueous solution (c and d). Each Ru(II)-Os(II) complex was excited by its  $MLCT_{Ru-Os} \rightarrow MLCT_{Ru^*-Os}$  transition wavelength.

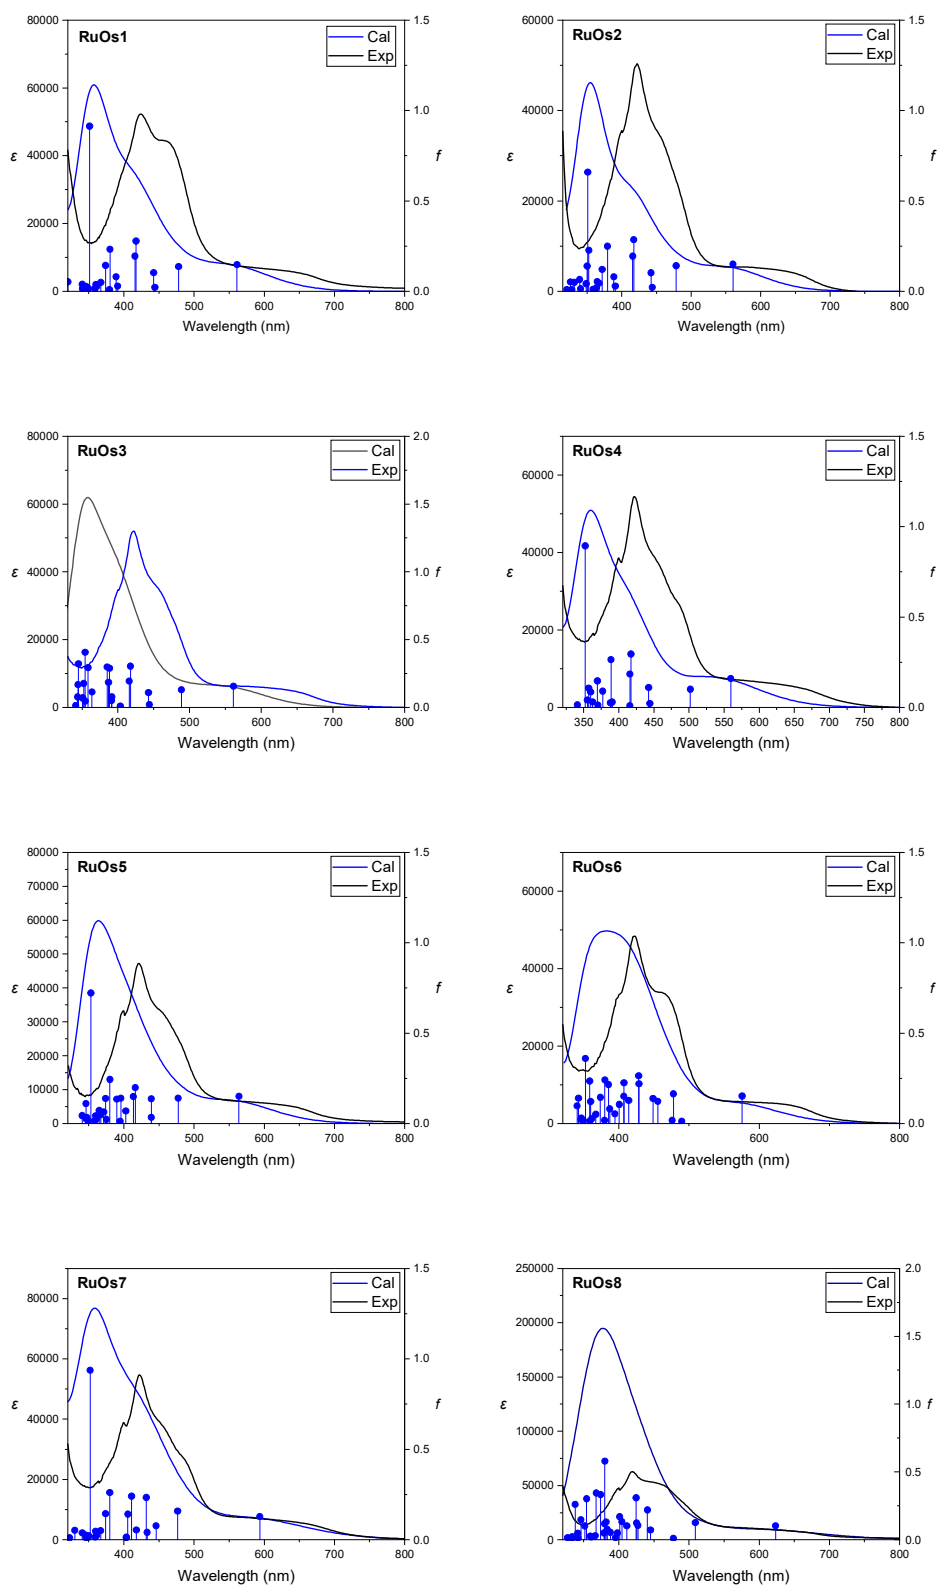

**Figure S2.** Simulated (Cal) and experimental (Exp) UV-Vis absorption spectra and oscillator strengths (blue spikes) of **RuOs1–8** by MN15-D3(BJ)/Lan12DZ (CPCM for water).

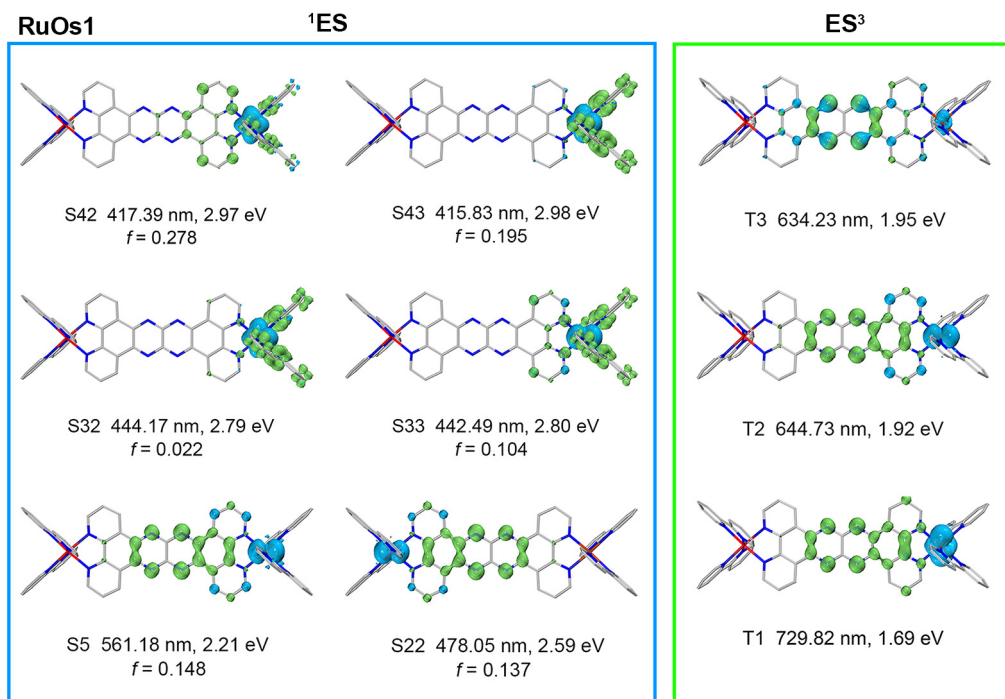

**Figure S3.** Real space representation of hole (blue) and electron (green) distributions of **RuOs1** for excited singlet ( $^1ES$ ) and triplet states ( $^3ES$ ). Excitation wavelength (nm), excitation energy (eV), and oscillator strength ( $f$ ) for each hole-to-electron transition are presented.

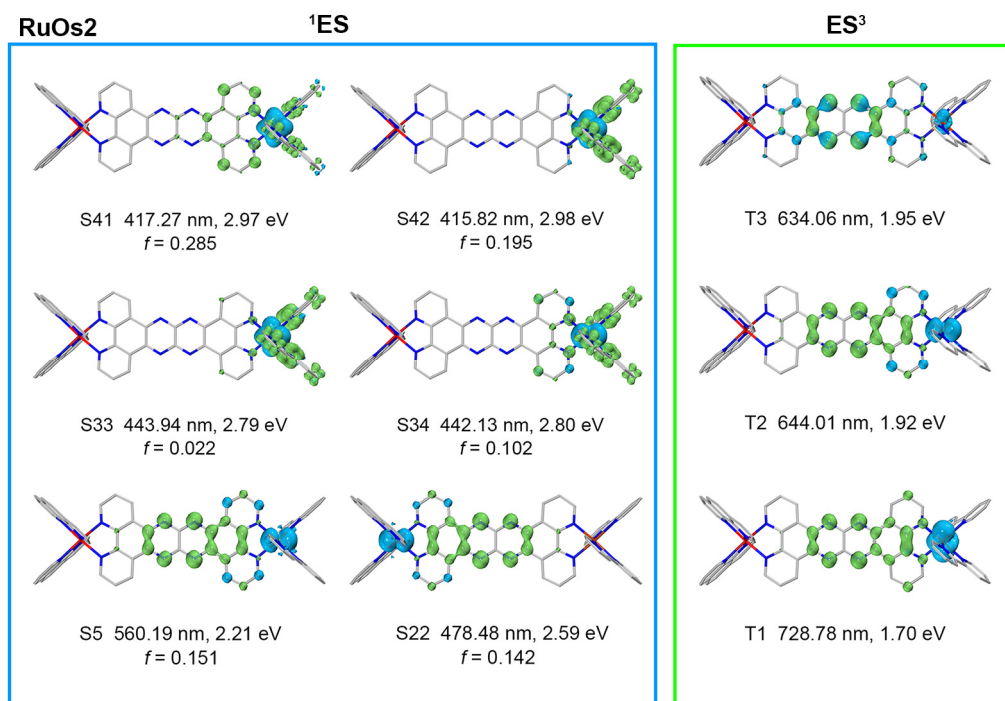

**Figure S4.** Real space representation of hole (blue) and electron (green) distributions of **RuOs2** for excited singlet ( $^1ES$ ) and triplet states ( $^3ES$ ). Excitation wavelength (nm), excitation energy (eV), and oscillator strength ( $f$ ) for each hole-to-electron transition are presented.

RuOs3

<sup>1</sup>ES

ES<sup>3</sup>

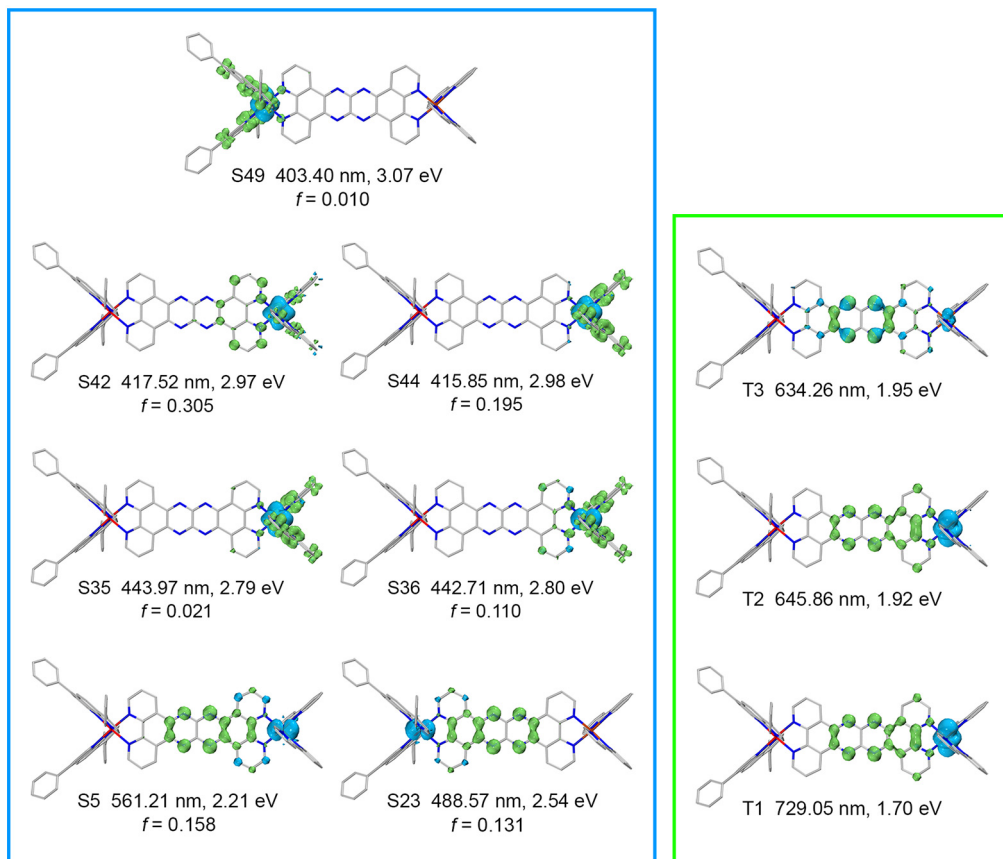

**Figure S5.** Real space representation of hole (blue) and electron (green) distributions of **RuOs3** for excited singlet (<sup>1</sup>ES) and triplet states (ES<sup>3</sup>). Excitation wavelength (nm), excitation energy (eV), and oscillator strength (*f*) for each hole-to-electron transition are presented.

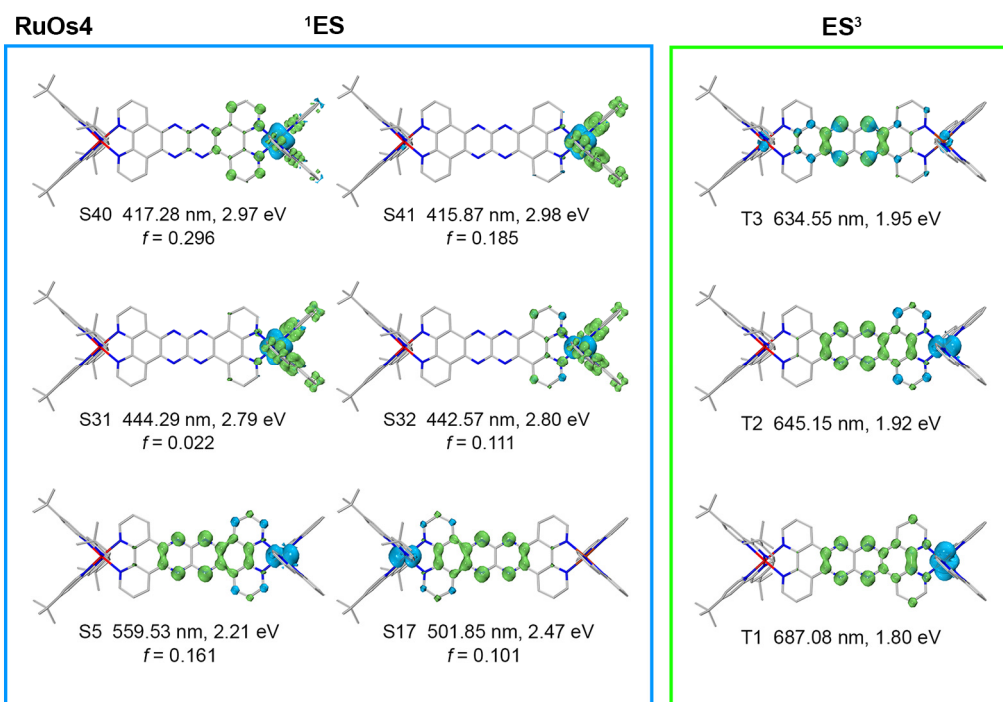

**Figure S6.** Real space representation of hole (blue) and electron (green) distributions of **RuOs4** for excited singlet ( $^1ES$ ) and triplet states ( $^3ES$ ). Excitation wavelength (nm), excitation energy (eV), and oscillator strength ( $f$ ) for each hole-to-electron transition are presented.

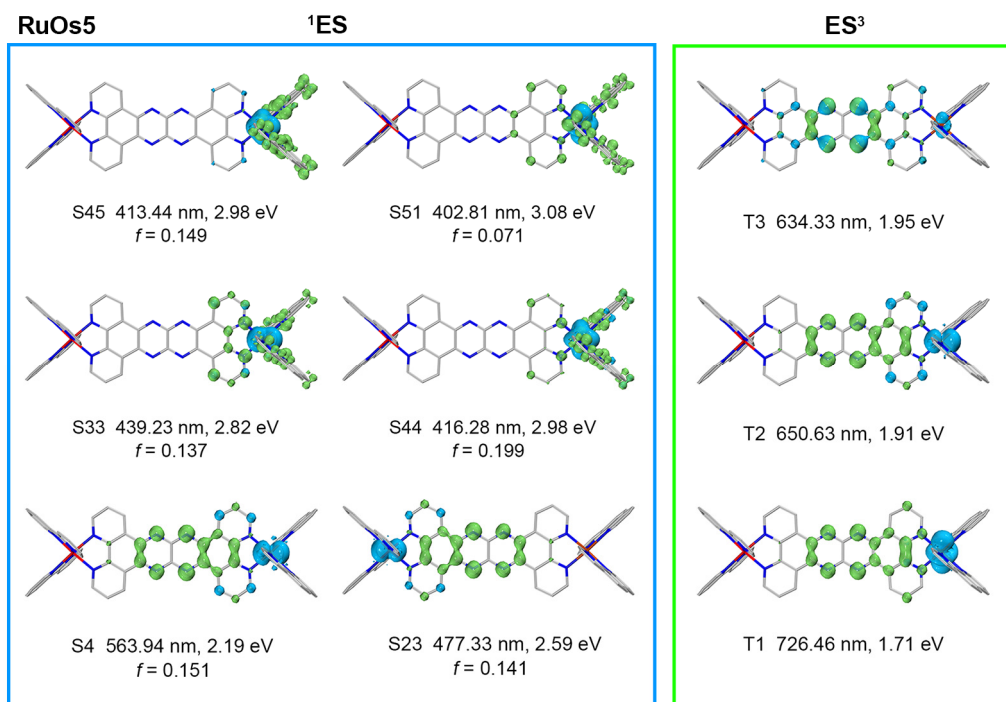

**Figure S7.** Real space representation of hole (blue) and electron (green) distributions of **RuOs5** for excited singlet (<sup>1</sup>ES) and triplet states (<sup>3</sup>ES). Excitation wavelength (nm), excitation energy (eV), and oscillator strength (*f*) for each hole-to-electron transition are presented.

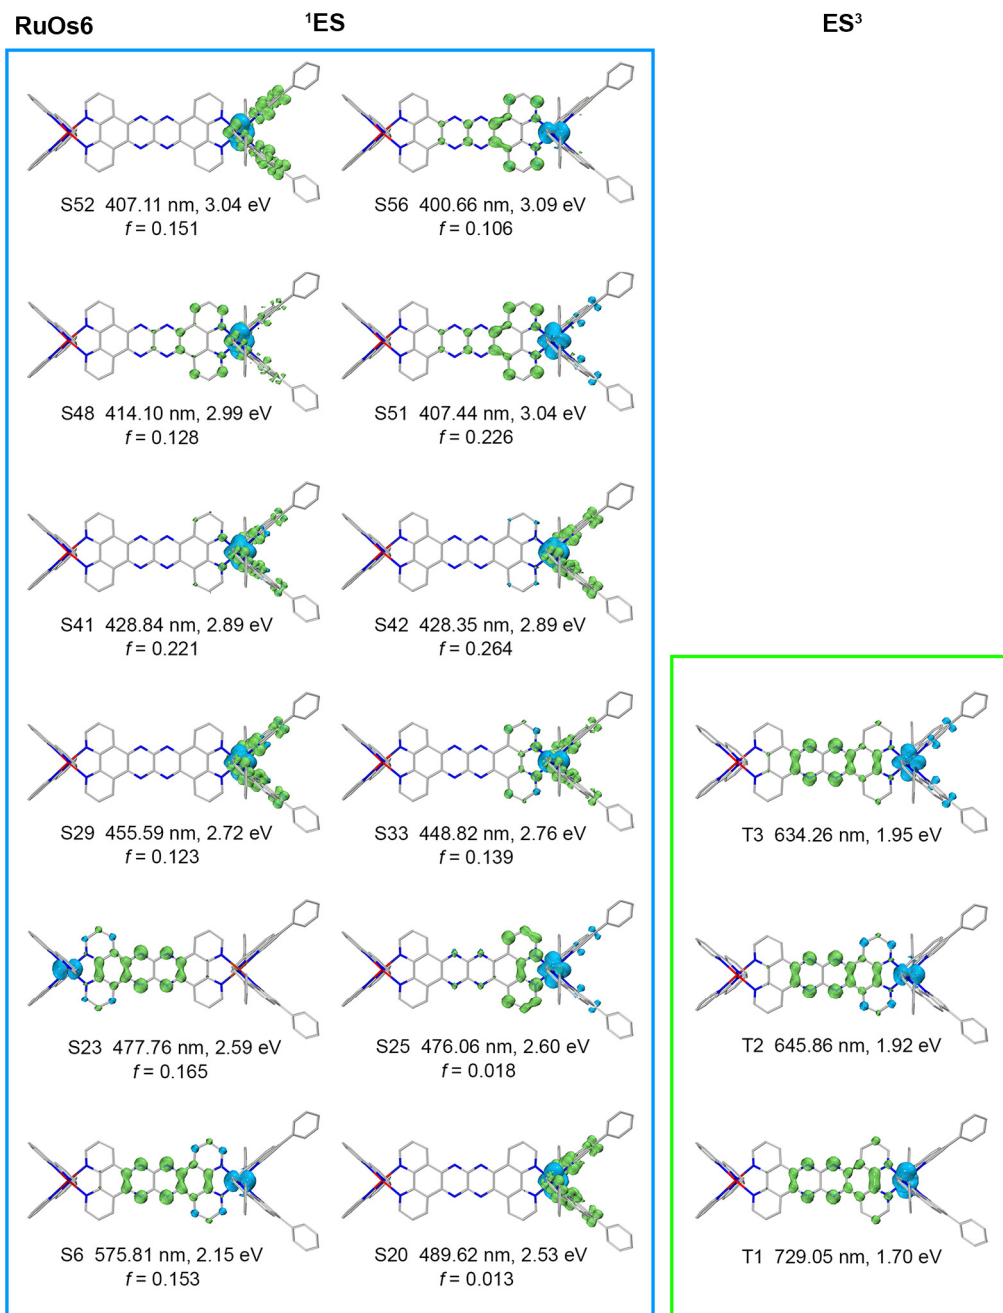

**Figure S8.** Real space representation of hole (blue) and electron (green) distributions of **RuOs6** for excited singlet (<sup>1</sup>ES) and triplet states (<sup>3</sup>ES). Excitation wavelength (nm), excitation energy (eV), and oscillator strength (*f*) for each hole-to-electron transition are presented.



RuOs7

 $^1\text{ES}$  $\text{ES}^3$ 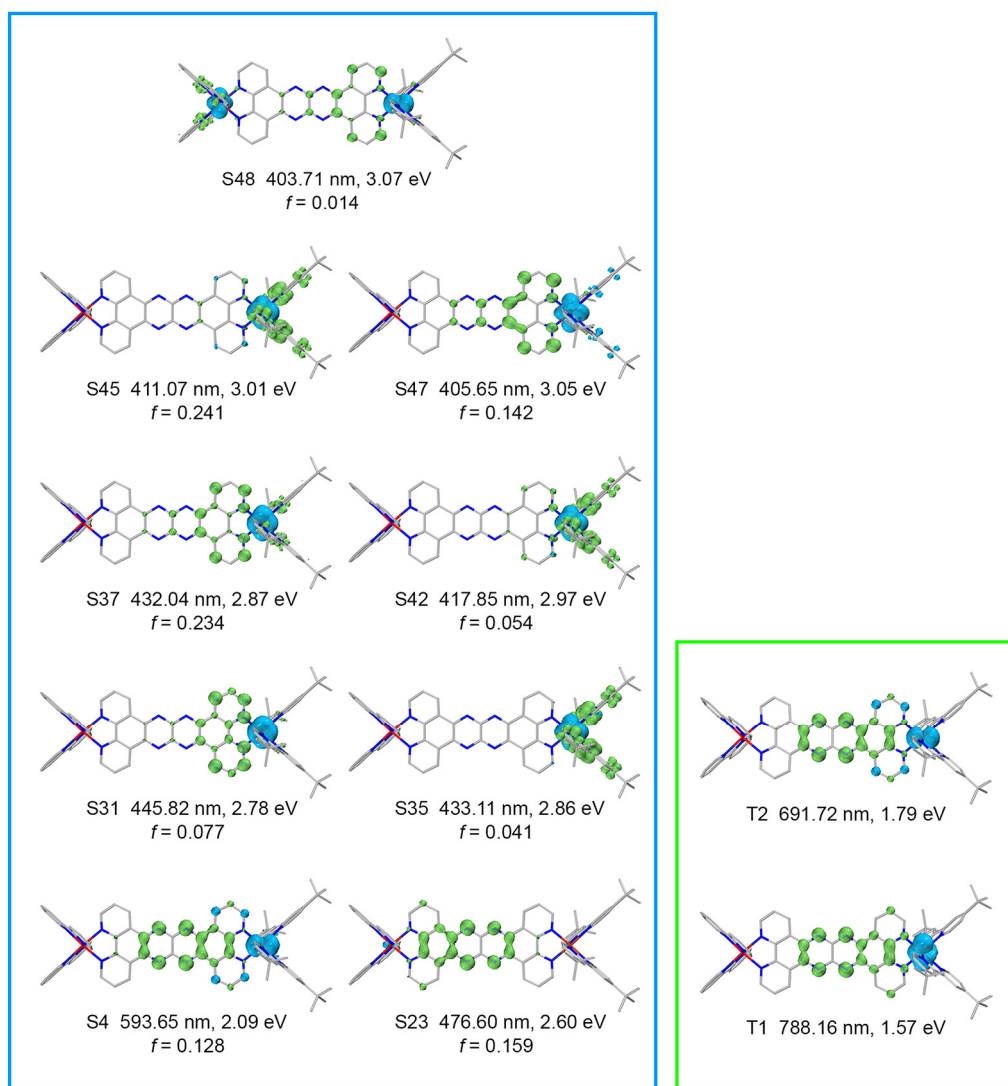

**Figure S9.** Real space representation of hole (blue) and electron (green) distributions of **RuOs7** for excited singlet ( $^1\text{ES}$ ) and triplet states ( $\text{ES}^3$ ). Excitation wavelength (nm), excitation energy (eV), and oscillator strength ( $f$ ) for each hole-to-electron transition are presented.

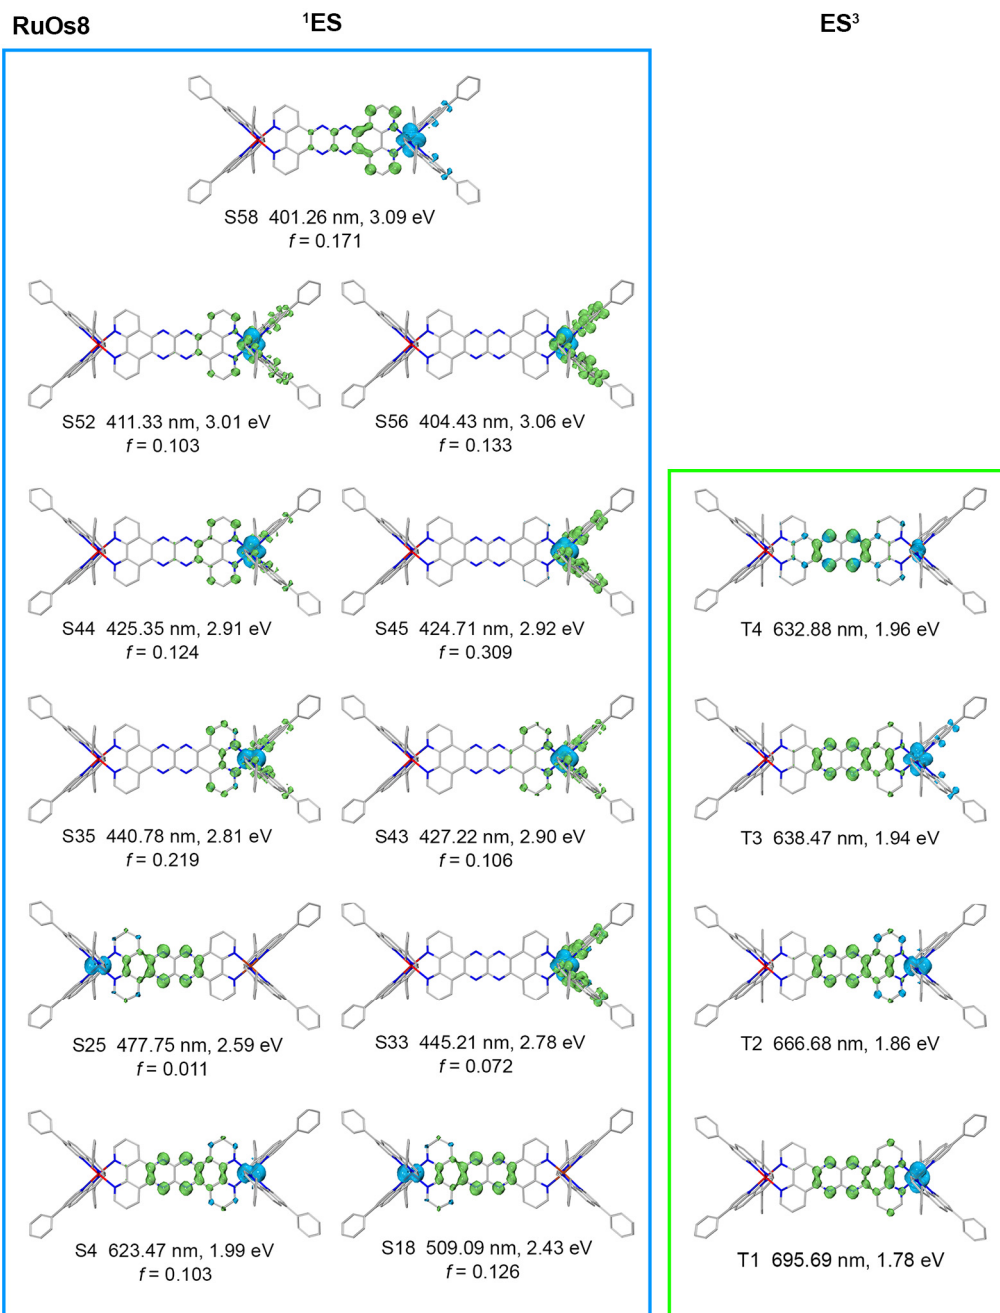

**Figure S10.** Real space representation of hole (blue) and electron (green) distributions of **RuOs8** for excited singlet (<sup>1</sup>ES) and triplet states (<sup>3</sup>ES). Excitation wavelength (nm), excitation energy (eV), and oscillator strength (*f*) for each hole-to-electron transition are presented.

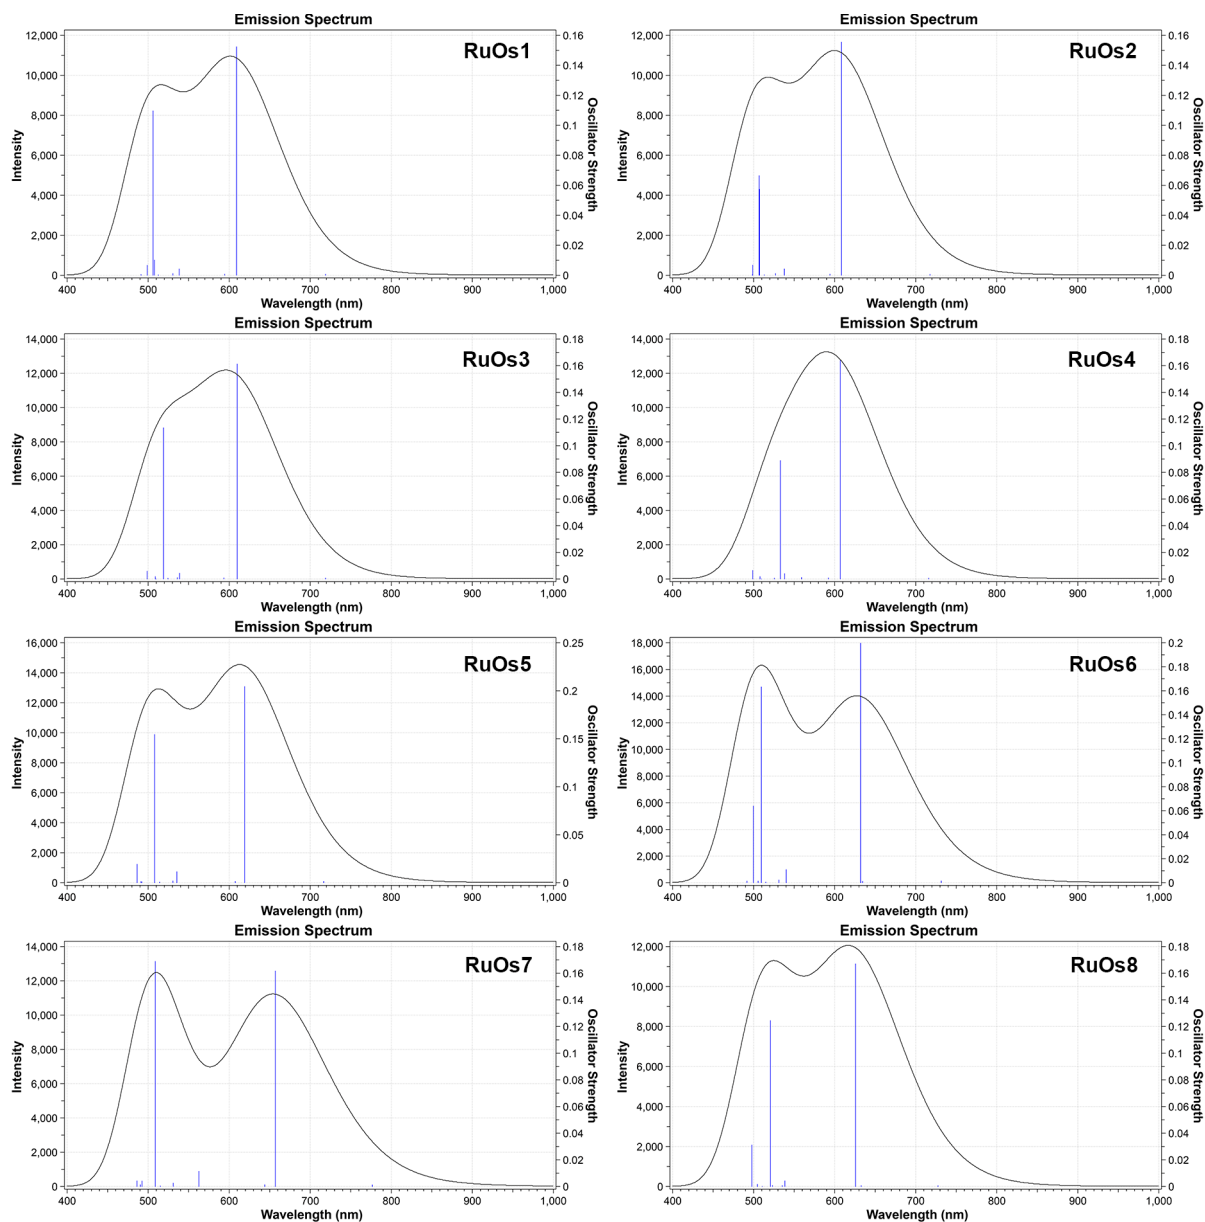

Figure S11 Simulated emission spectra and oscillator strengths (blue spikes) of **RuOs1–8** by MN15-D3(BJ)/Lanl2DZ (CPCM for water).

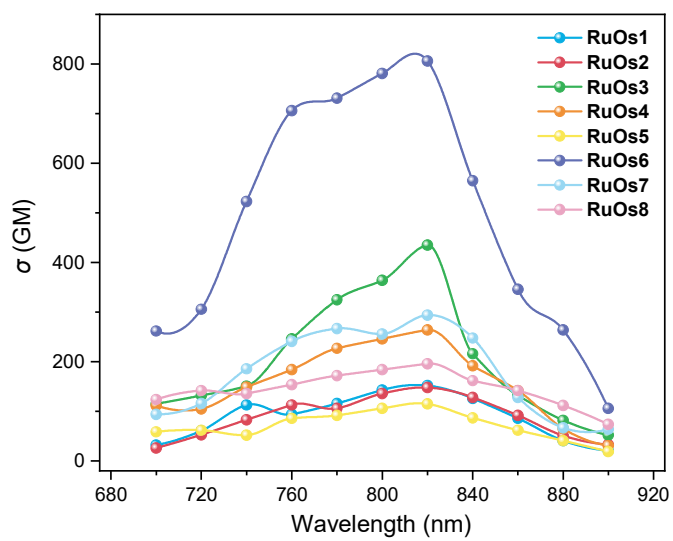

Fig. S12 TPASCs ( $\sigma$ ) of **RuOs1–8** (50  $\mu$ M) in dry THF in the range of 700–900 nm.

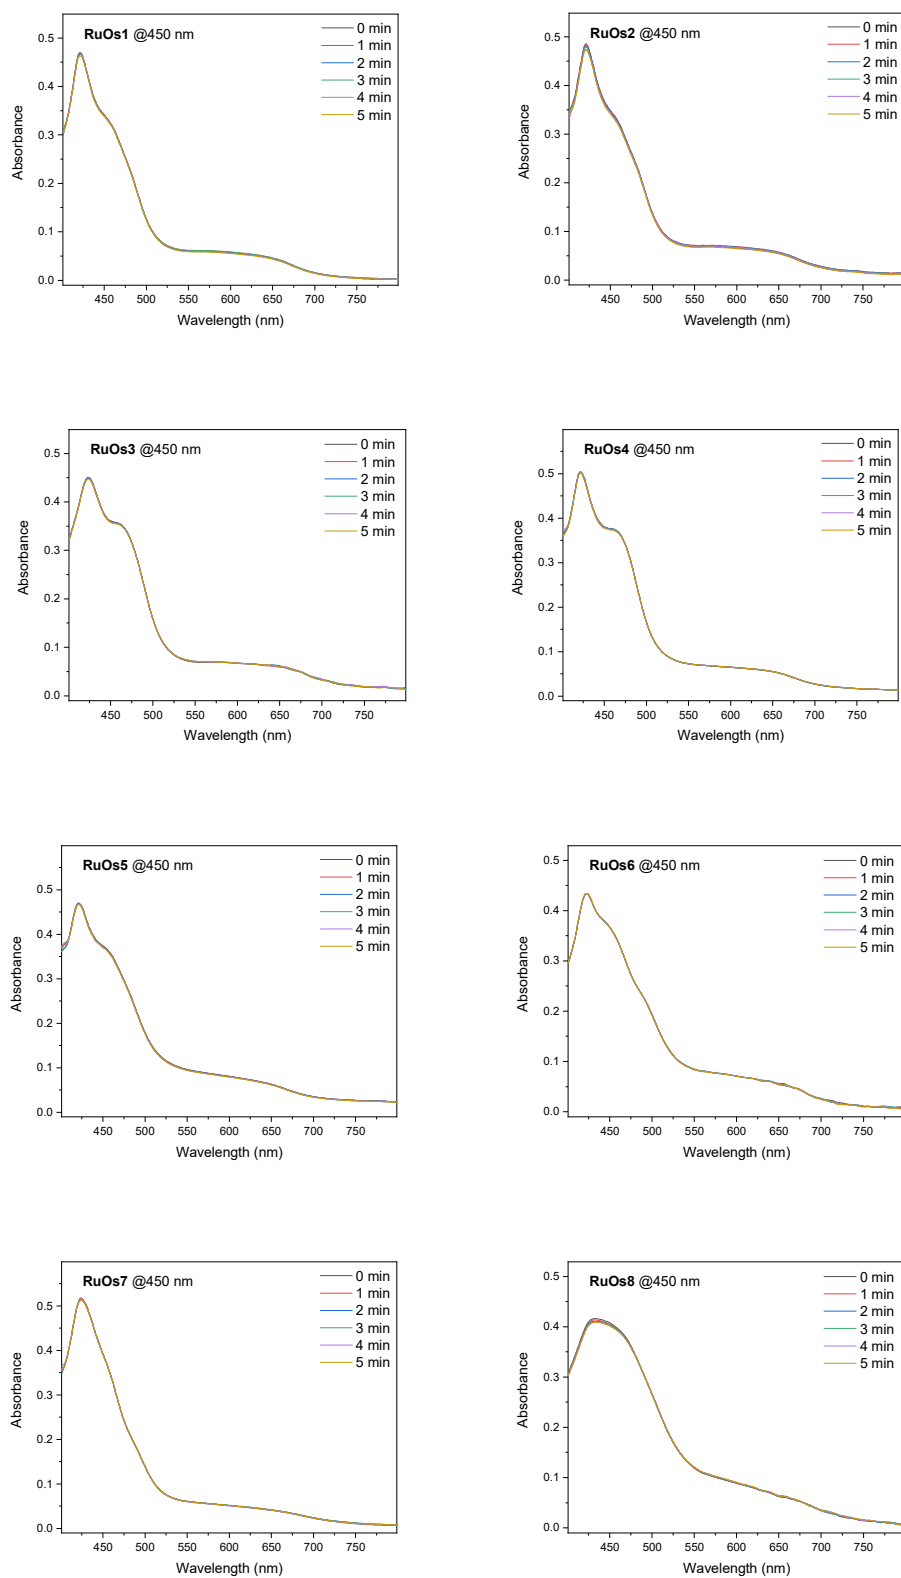

**Figure S13.** Photostability examined by the absorption spectra of **RuOs1–8** (10  $\mu\text{M}$ ) in aqueous solution upon 450 nm LED (50  $\text{mW cm}^{-2}$ ) irradiation for 5 min.

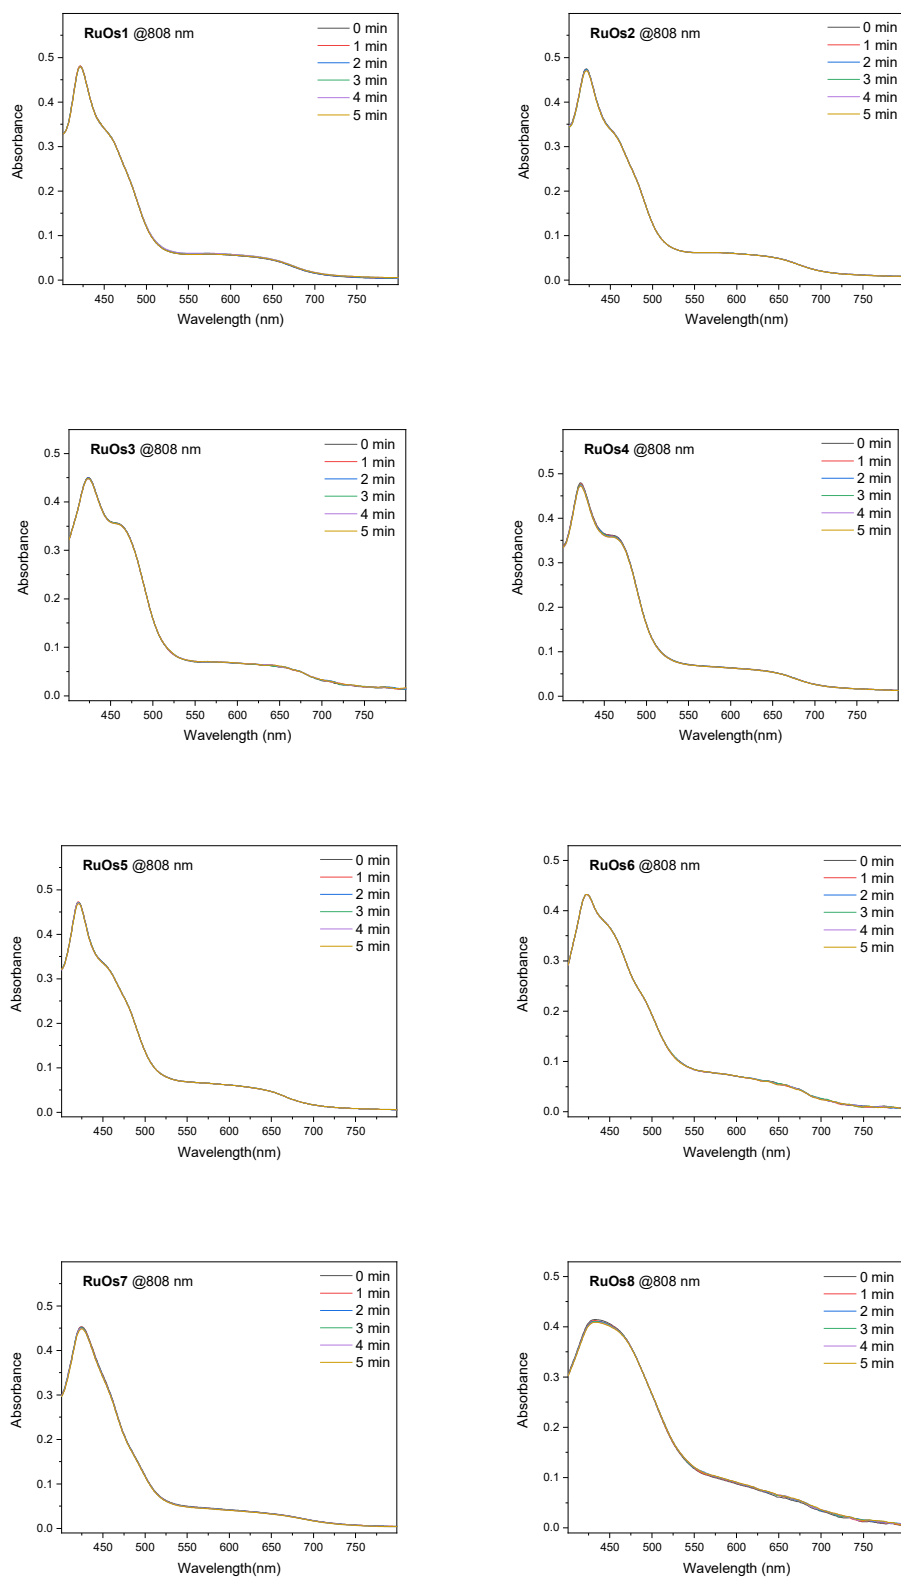

**Figure S14.** Photostability examined by the absorption spectra of **RuOs1–8** (10 μM) in aqueous solution upon 808 nm LED (100 mW cm<sup>-2</sup>) irradiation for 5 min.

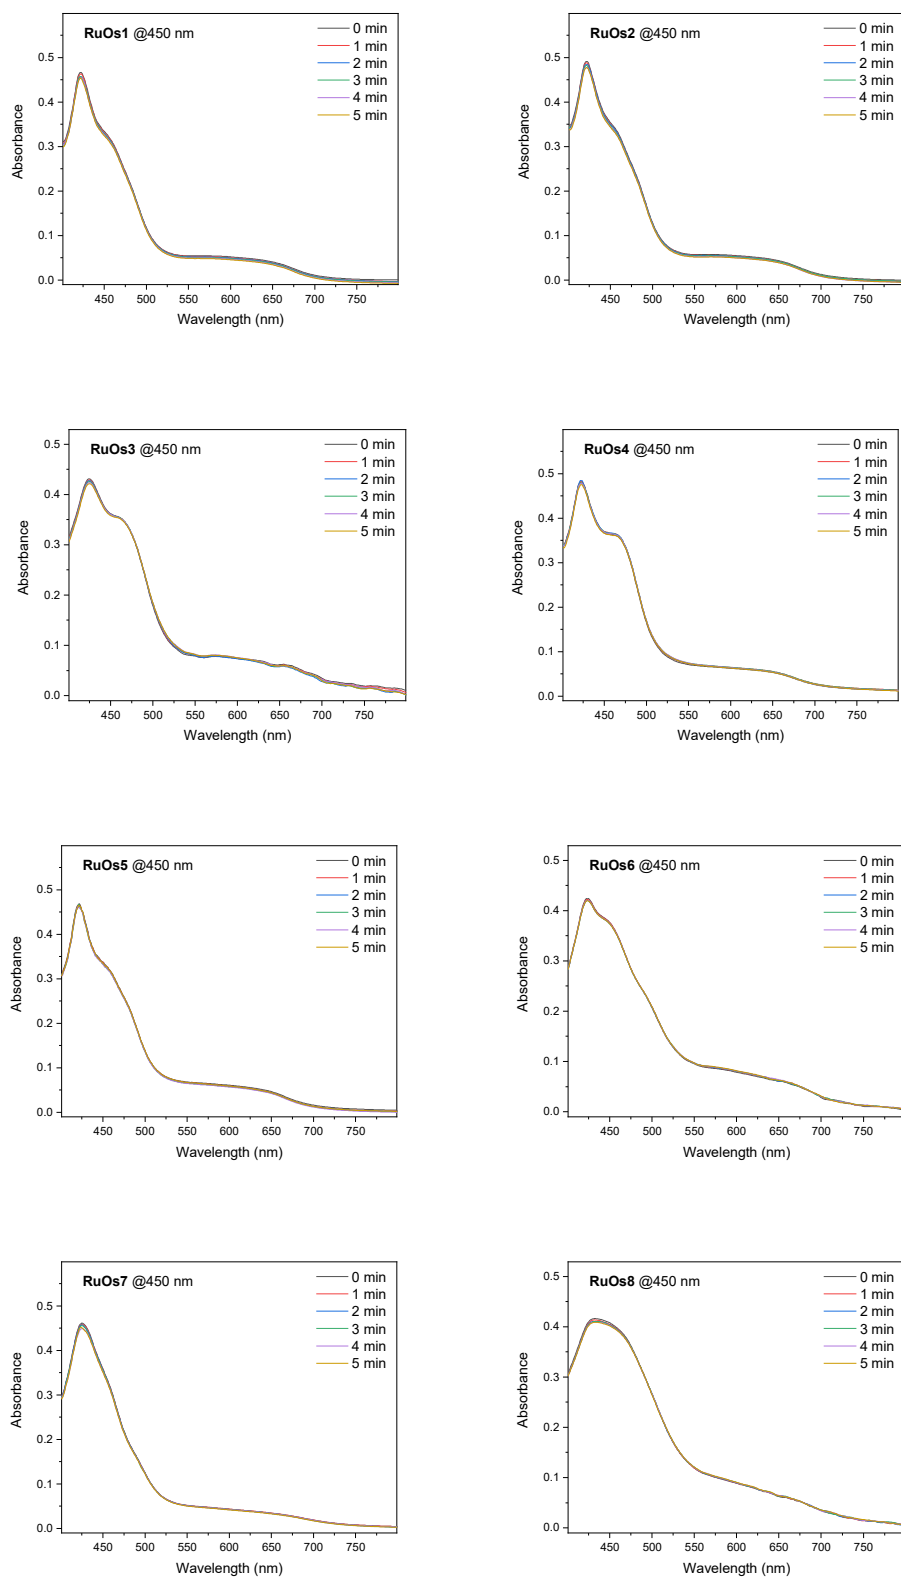

**Figure S15.** Photostability examined by the absorption spectra of **RuOs1–8** (10 μM) in RPMI-1640 medium upon 450 nm LED (50 mW cm<sup>-2</sup>) irradiation for 5 min.

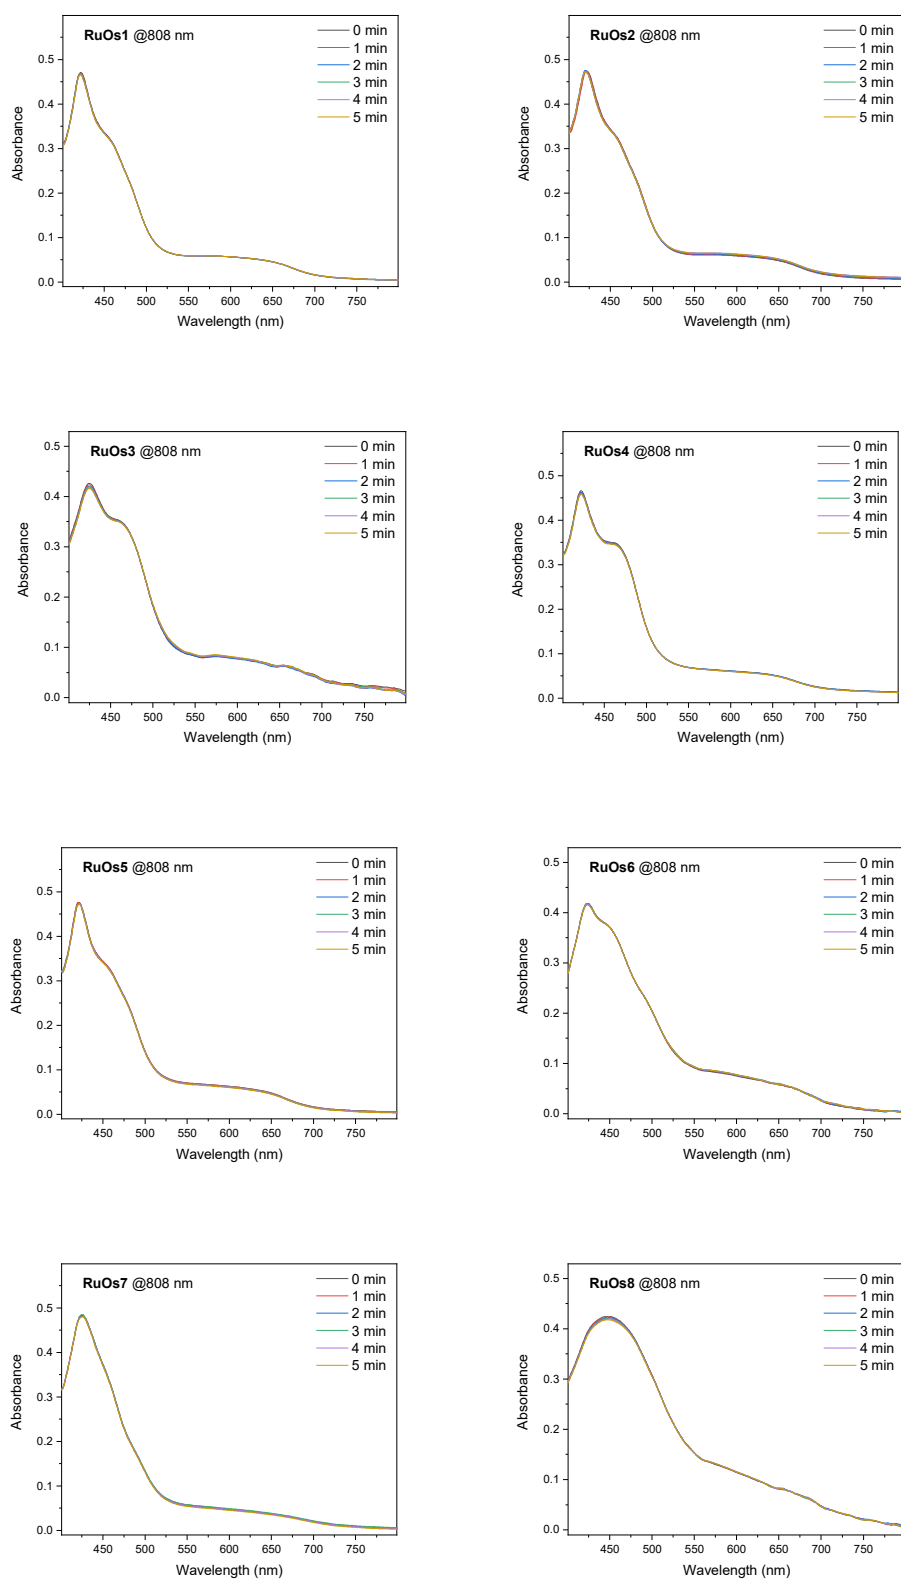

**Figure S16.** Photostability examined by the absorption spectra of **RuOs1–8** (10  $\mu\text{M}$ ) in RPMI-1640 medium upon 808 nm LED (100  $\text{mW cm}^{-2}$ ) irradiation for 5 min.



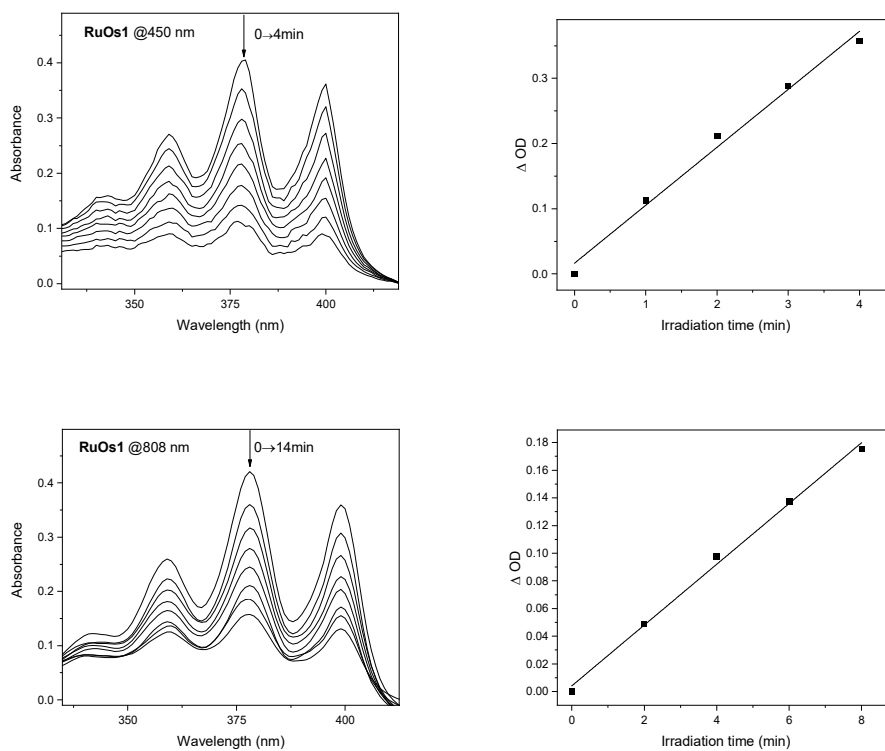

**Figure S17.** Absorption spectral changes of ABDA in aqueous solution upon irradiation of different light sources in the presence of **RuOs1**.

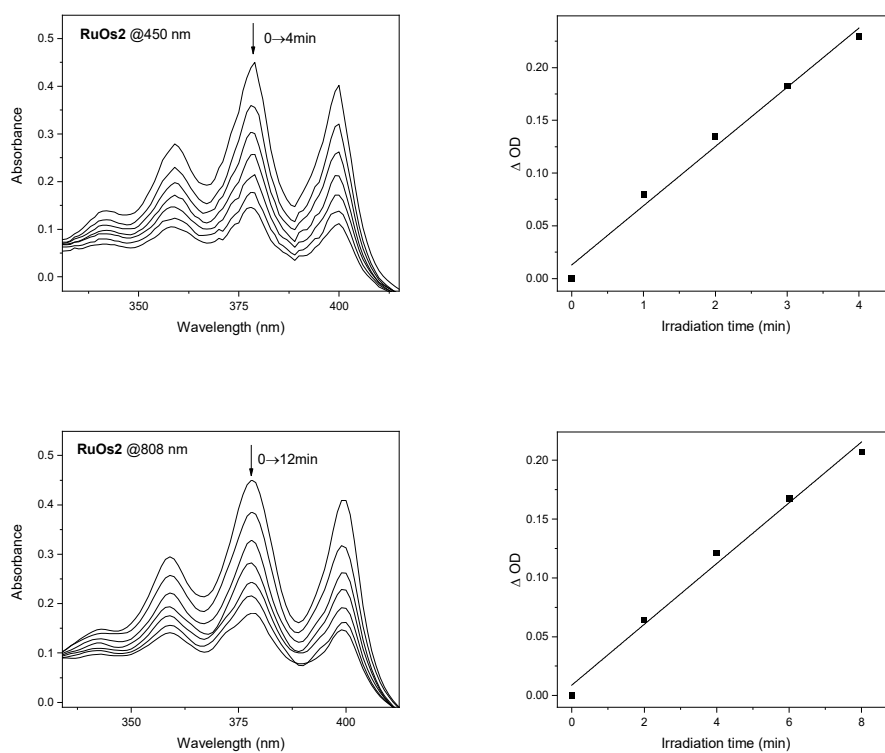

**Figure S18.** Absorption spectral changes of ABDA in aqueous solution upon irradiation of different light sources in the presence of **RuOs2**.

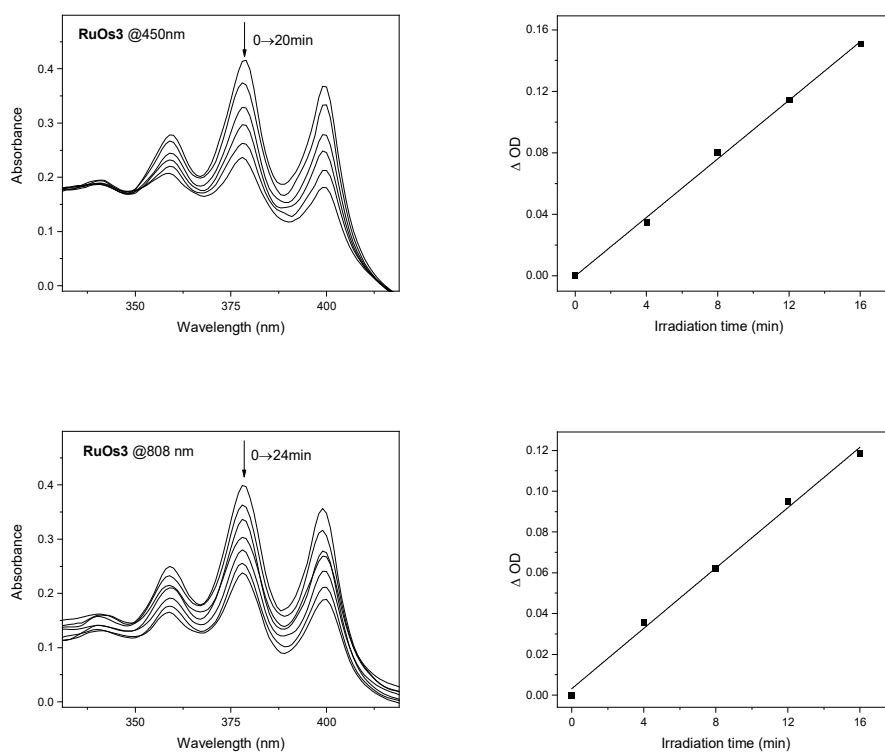

**Figure S19.** Absorption spectral changes of ABDA in aqueous solution upon irradiation of different light sources in the presence of **RuOs3**.

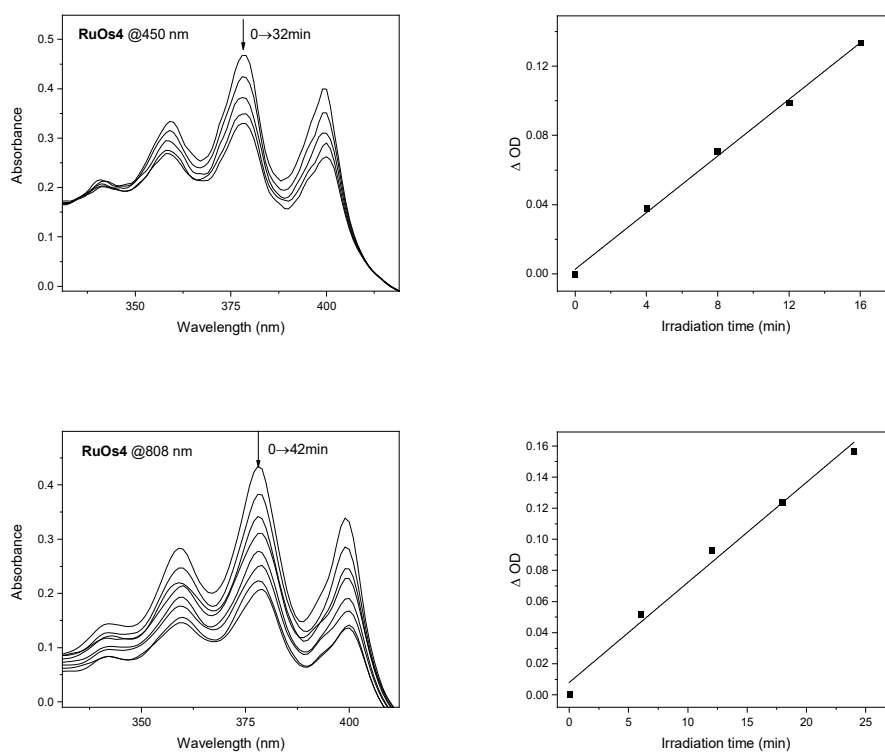

**Figure S20.** Absorption spectral changes of ABDA in aqueous solution upon irradiation of different light sources in the presence of **RuOs4**.

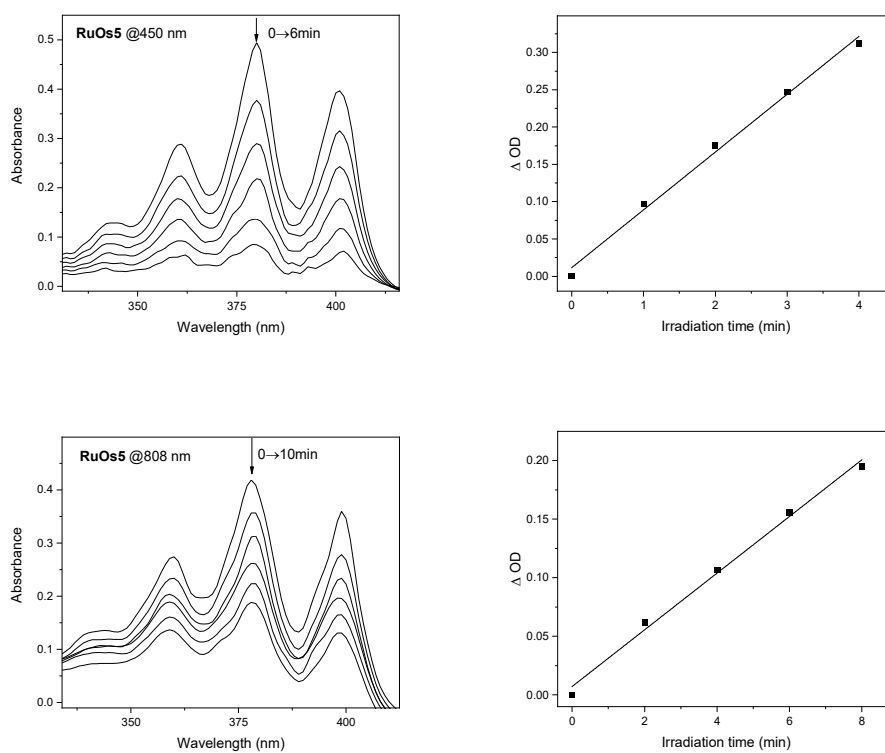

**Figure S21.** Absorption spectral changes of ABDA in aqueous solution upon irradiation of different light sources in the presence of **RuOs5**.

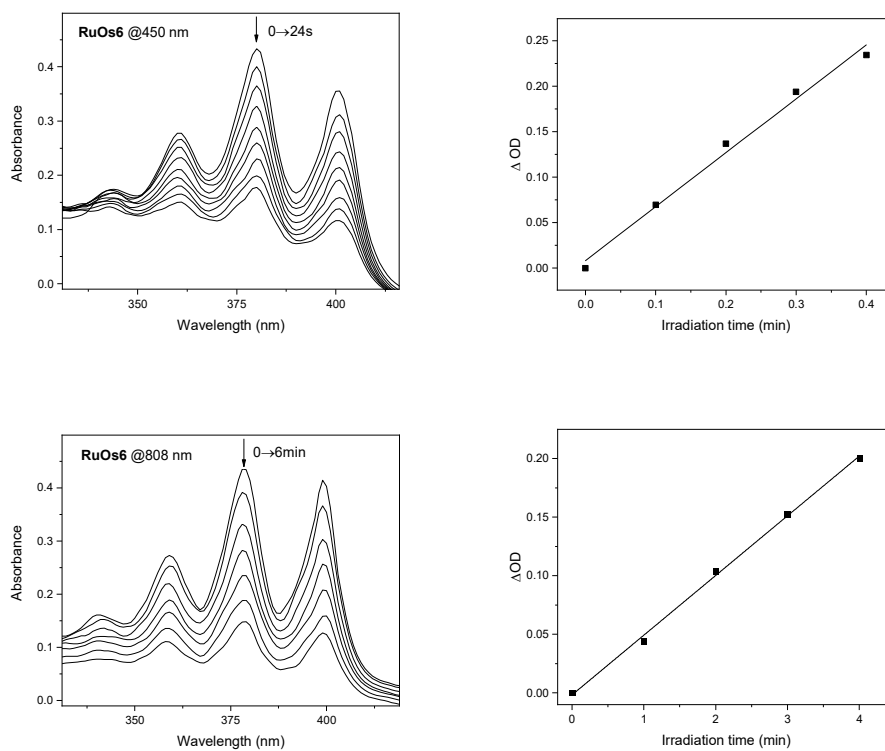

**Figure S22.** Absorption spectral changes of ABDA in aqueous solution upon irradiation of different light sources in the presence of **RuOs6**.

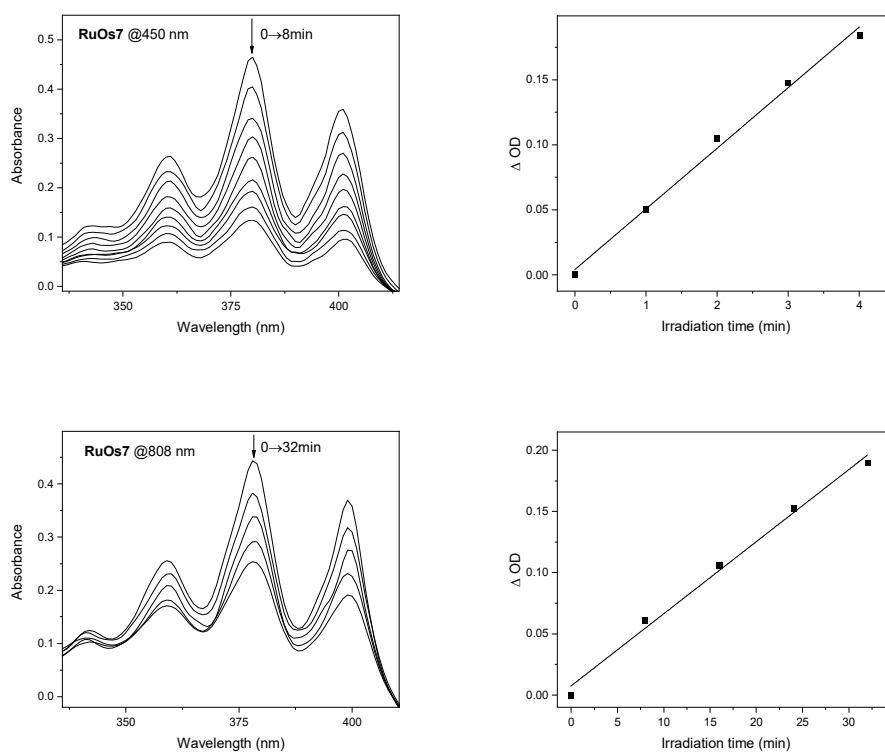

**Figure S23.** Absorption spectral changes of ABDA in aqueous solution upon irradiation of different light sources in the presence of **RuOs7**.

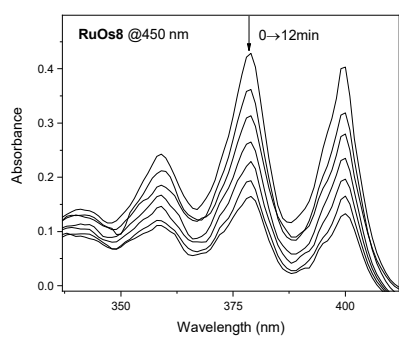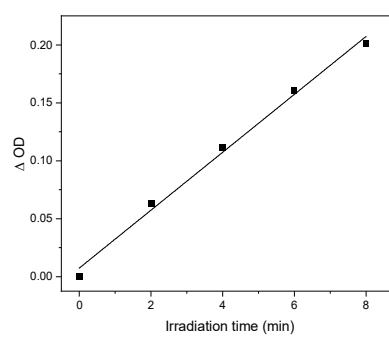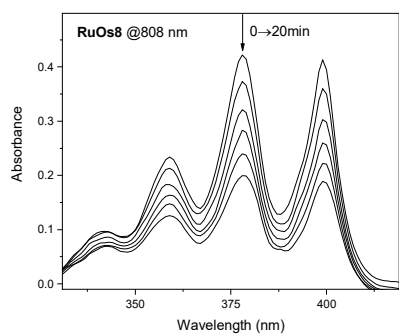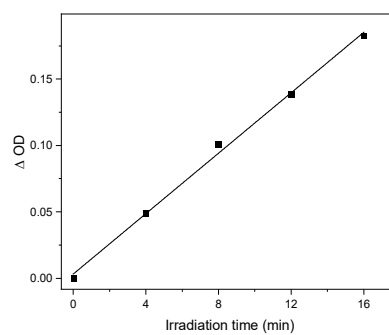

**Figure S24.** Absorption spectral changes of ABDA in aqueous solution upon irradiation of different light sources in the presence of **RuOs8**.



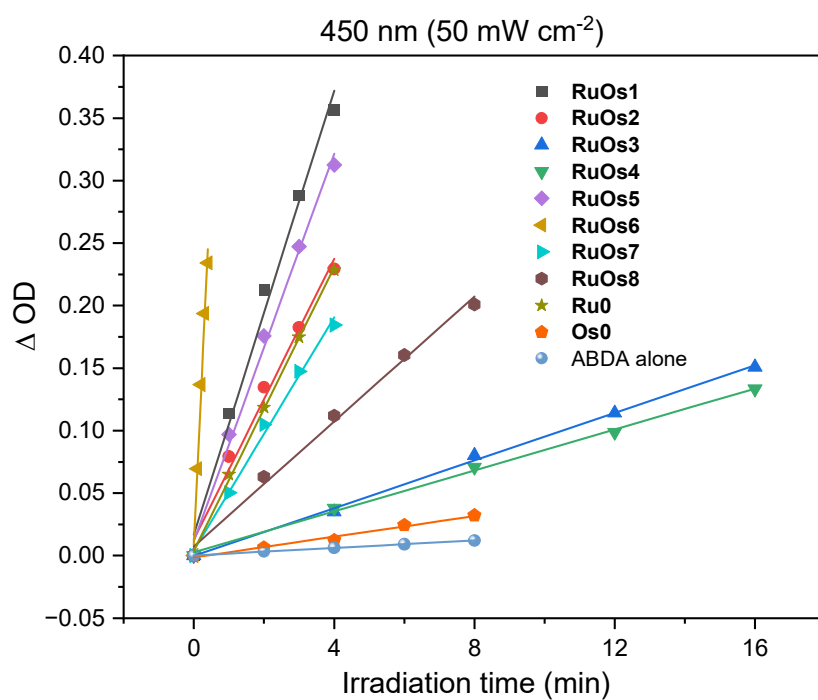

**Figure S25.** Linear fittings of  $\Delta OD$  at 378 nm versus time (min) based on the time-dependent changes in absorption spectra of ABDA (100  $\mu M$ ) in the absence and presence of **RuOs1–8**, **Ru0** and **Os0** (10  $\mu M$ ) upon 450 nm LED (50 mW cm<sup>-2</sup>) irradiation. Same volume of DMSO as complex solution was added for “ABDA alone”.

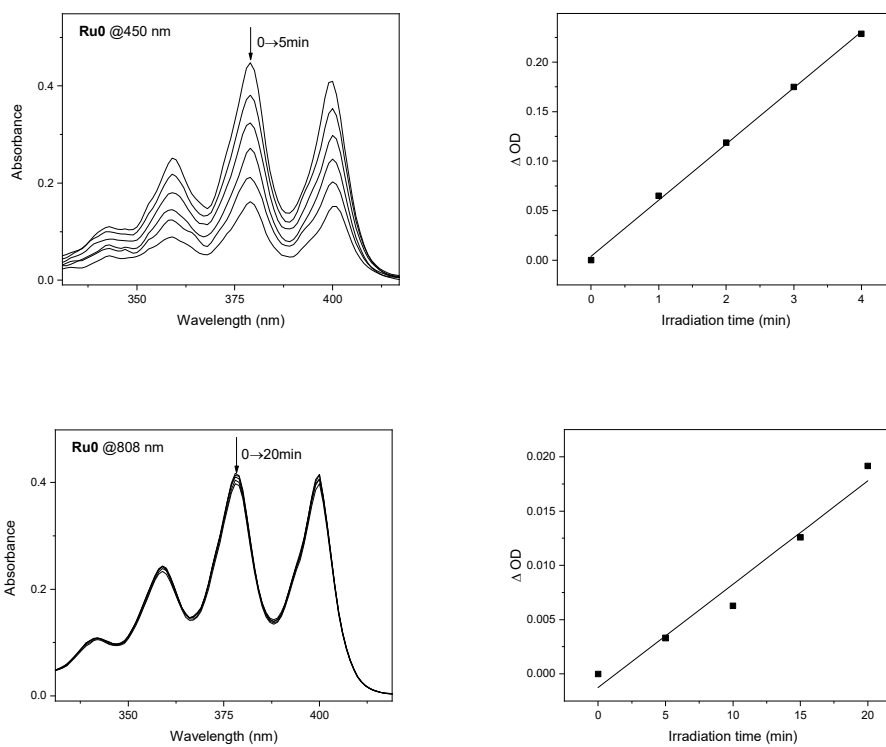

**Figure S26.** Absorption spectral changes of ABDA in aqueous solution upon irradiation of different light sources in the presence of  $[\text{Ru}(\text{bpy})_3]^{2+}$  (**Ru0**).

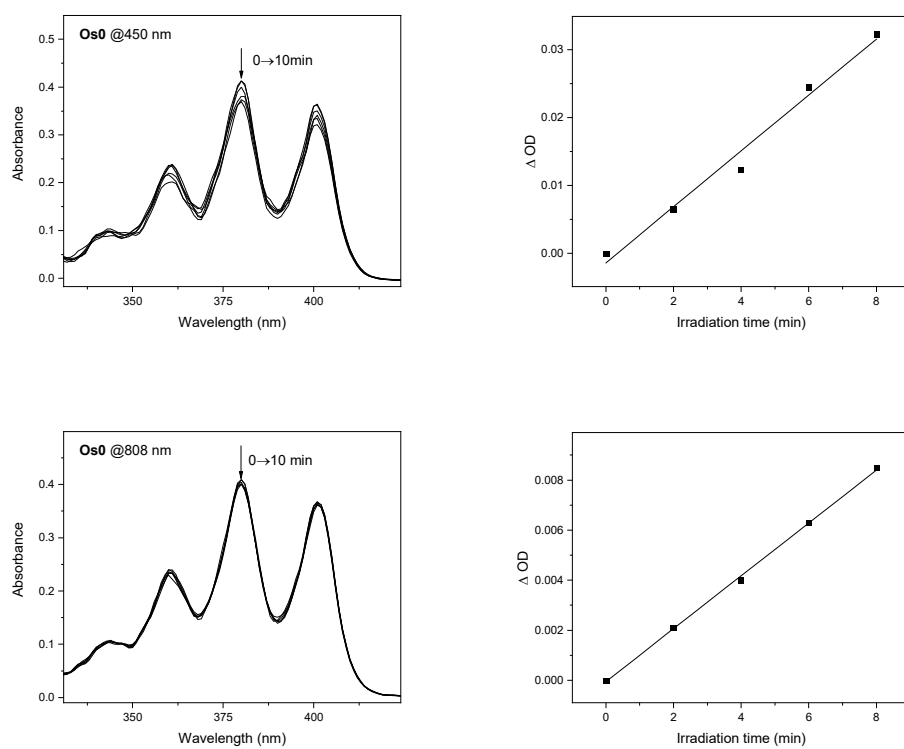

**Figure S27.** Absorption spectral changes of ABDA in aqueous solution upon irradiation of different light sources in the presence of  $[\text{Os}(\text{bpy})_3]^{2+}$  (**Os0**).

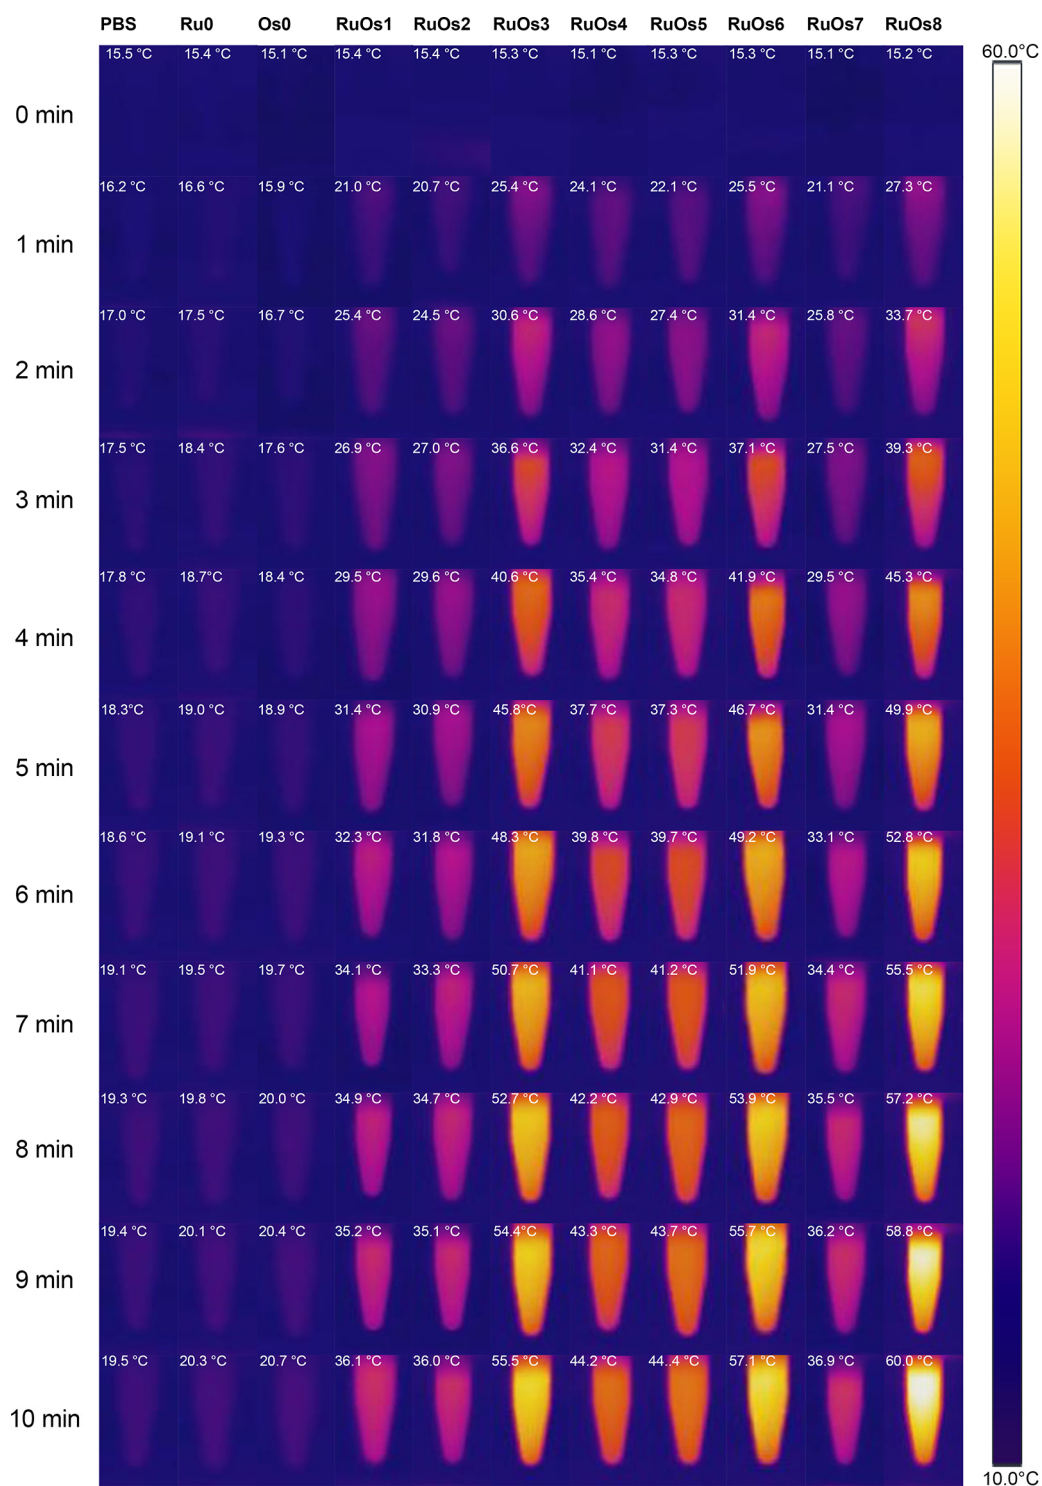

**Figure S28.** Thermal images of PBS, **RuOs1–8**,  $[\text{Ru}(\text{bpy})_3]^{2+}$  (**Ru0**) and  $[\text{Os}(\text{bpy})_3]^{2+}$  (**Os0**) in aqueous solution (100  $\mu\text{M}$ ) upon 808 nm LPL (100  $\text{mW cm}^{-2}$ ) irradiation for 10 min at 1-min intervals.

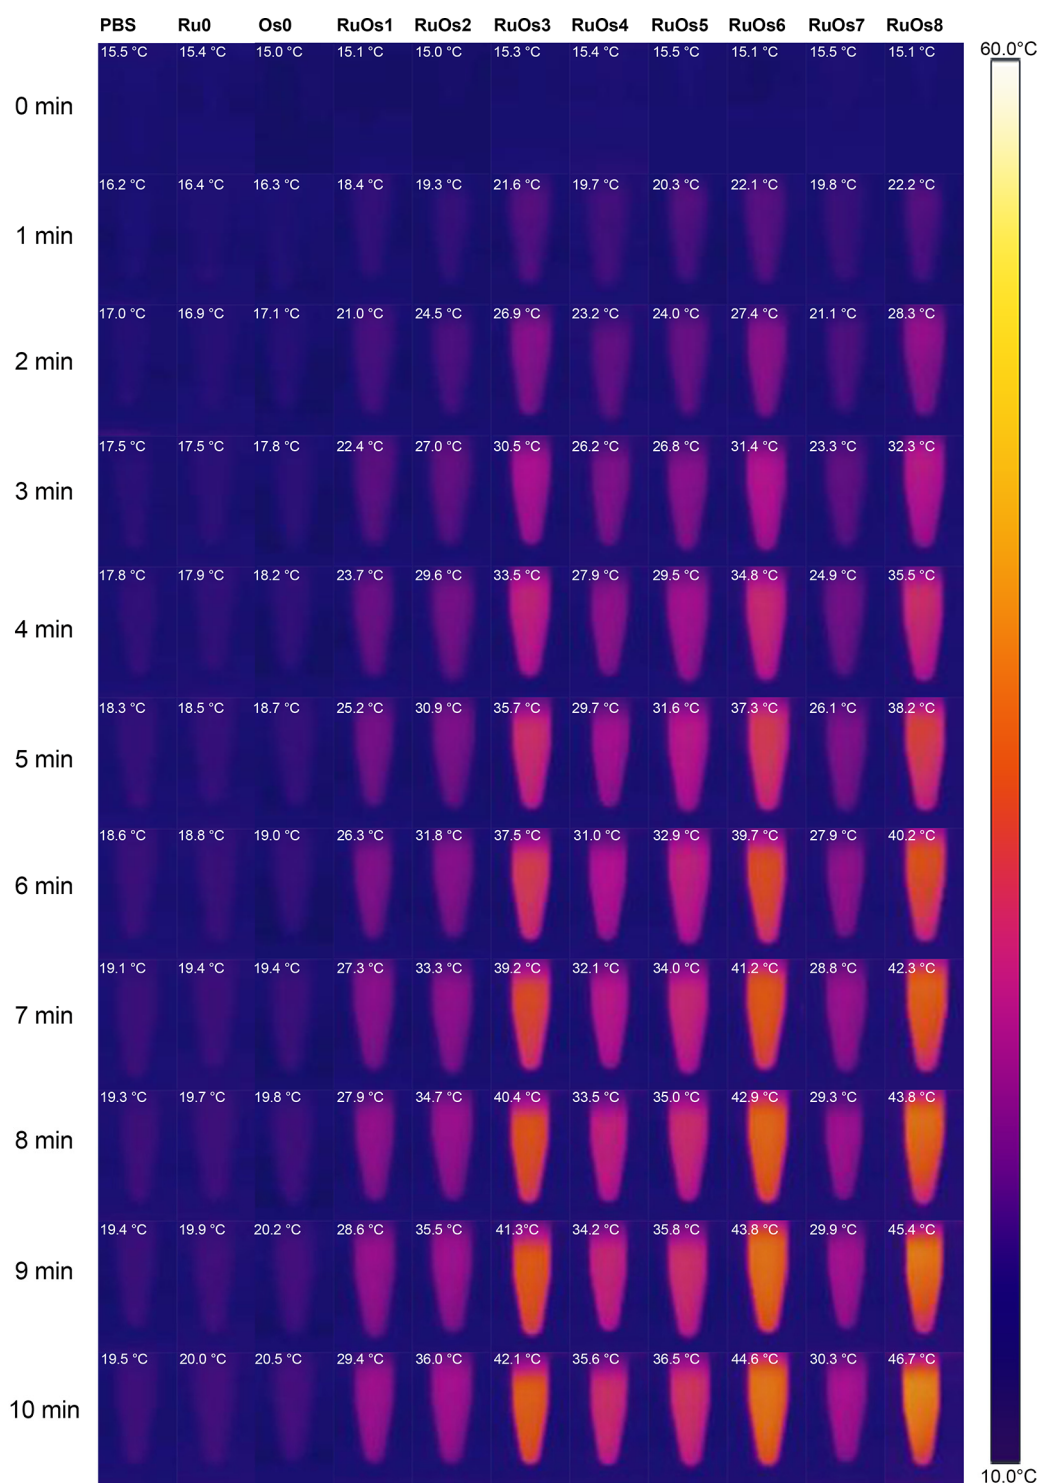

**Figure S29.** Thermal images of PBS, **RuOs1–8**,  $[\text{Ru}(\text{bpy})_3]^{2+}$  (**Ru0**) and  $[\text{Os}(\text{bpy})_3]^{2+}$  (**Os0**) in aqueous solution (50  $\mu\text{M}$ ) upon 808 nm LPL (100  $\text{mW cm}^{-2}$ ) irradiation for 10 min at 1-min intervals.

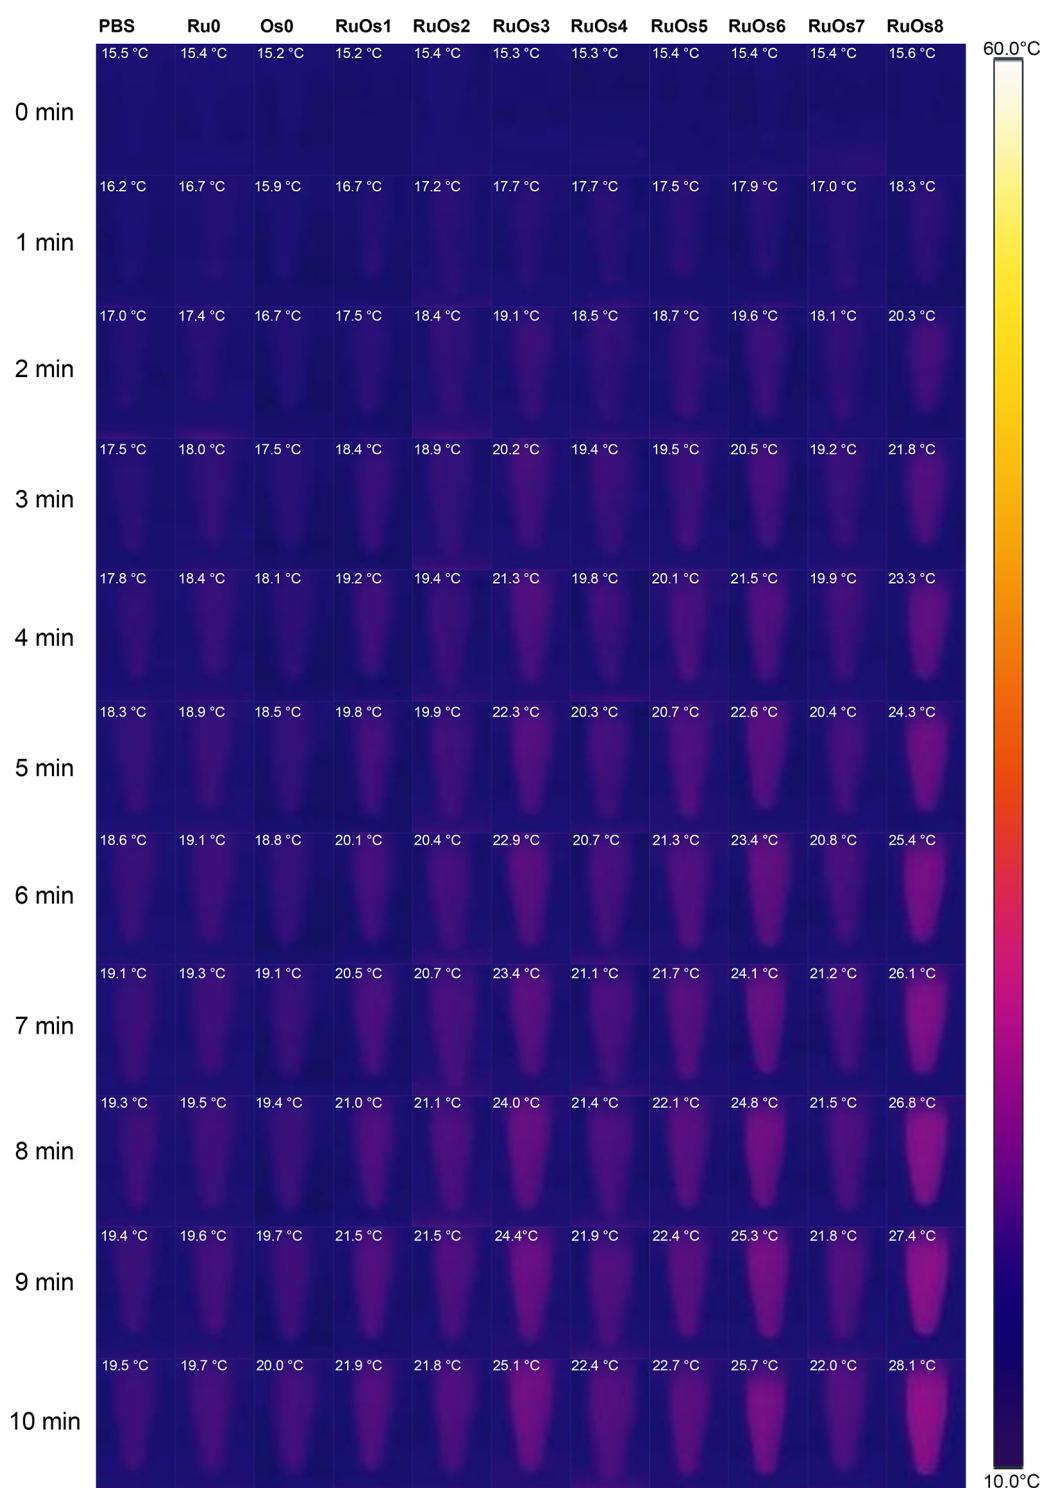

**Figure S30.** Thermal images of PBS, **RuOs1–8**,  $[\text{Ru}(\text{bpy})_3]^{2+}$  (**Ru0**) and  $[\text{Os}(\text{bpy})_3]^{2+}$  (**Os0**) in aqueous solution (10  $\mu\text{M}$ ) upon 808 nm LPL (100  $\text{mW cm}^{-2}$ ) irradiation for 10 min at 1-min intervals.

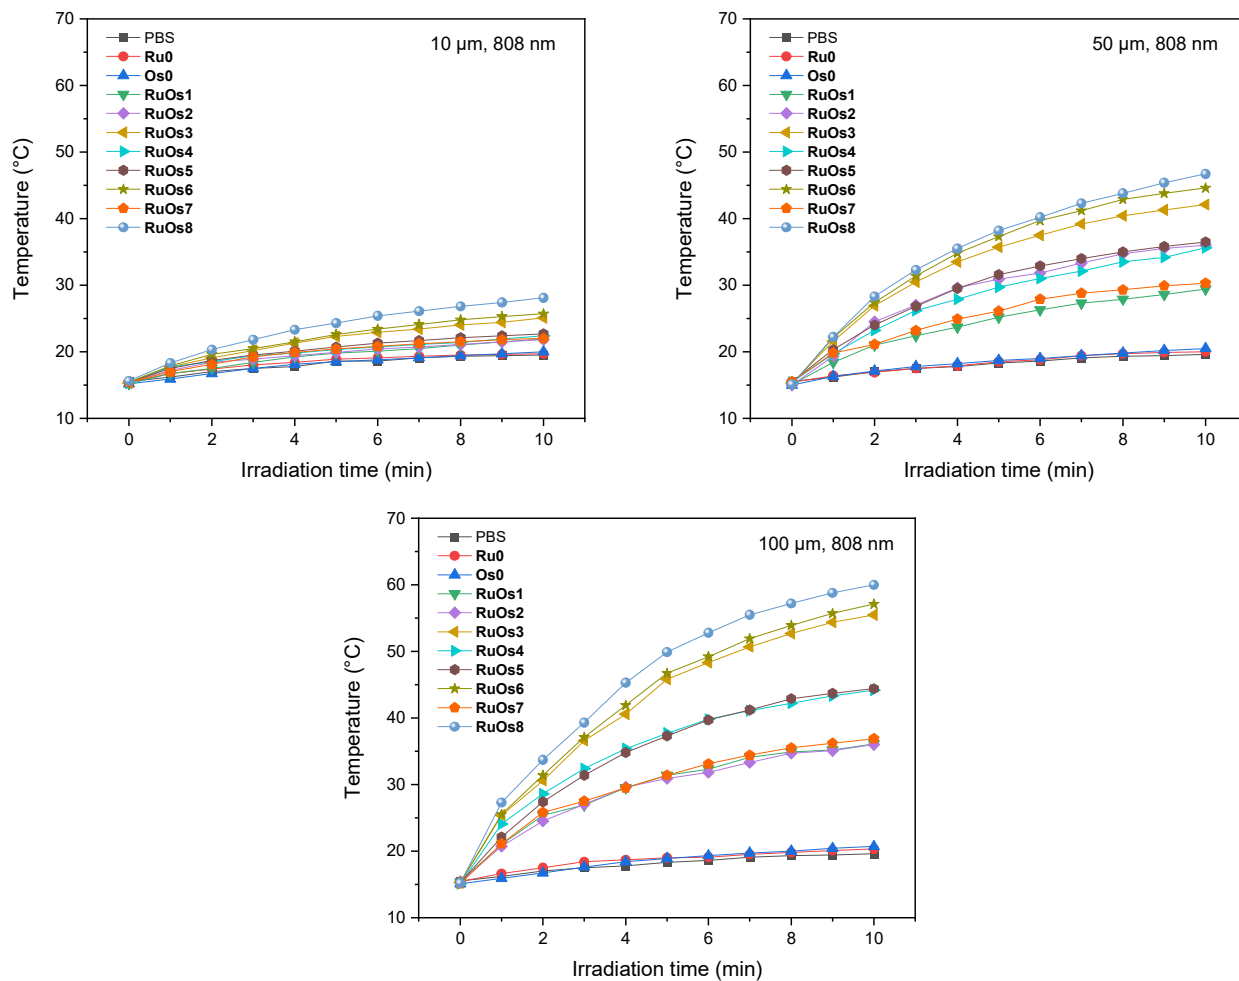

**Fig S31.** The temperature-rising curves of PBS, RuOs1–8, [Ru(bpy)<sub>3</sub>]<sup>2+</sup> (Ru0) and [Os(bpy)<sub>3</sub>]<sup>2+</sup> (Os0) in aqueous solution (10, 50, and 100 μM) upon irradiation of 808 nm LPL (100 mW cm<sup>-2</sup>) for 10 min at 1-min intervals.

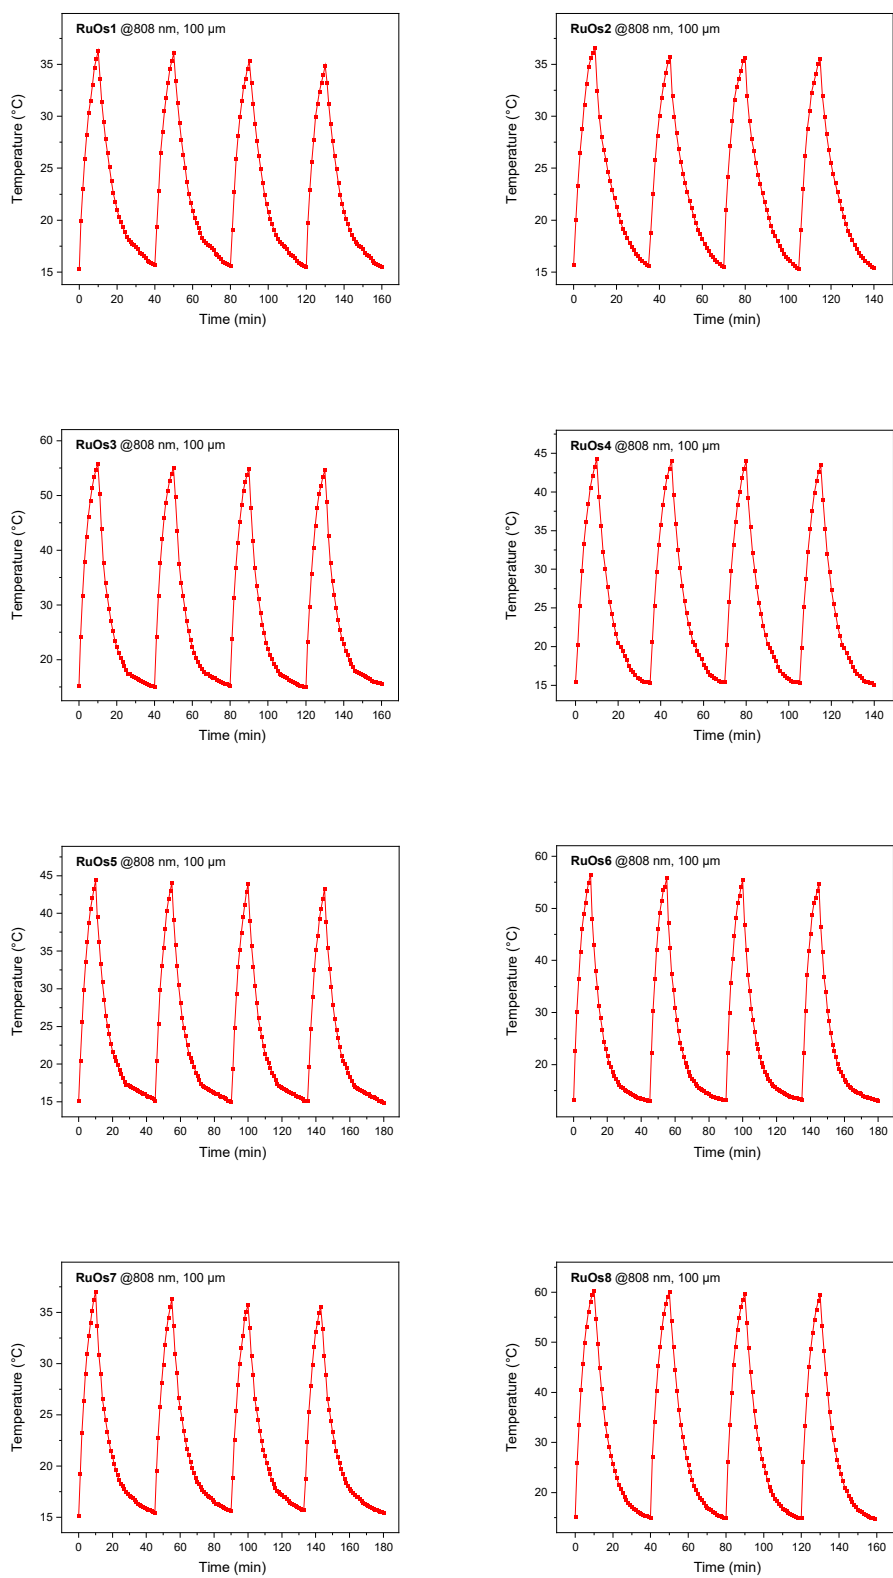

**Fig S32.** Temperature changes of the aqueous solution of **RuOs1–8** (100  $\mu$ M) during four “irradiating/cooling” cycles by 808 nm LPL (100 mW  $\text{cm}^{-2}$ ).



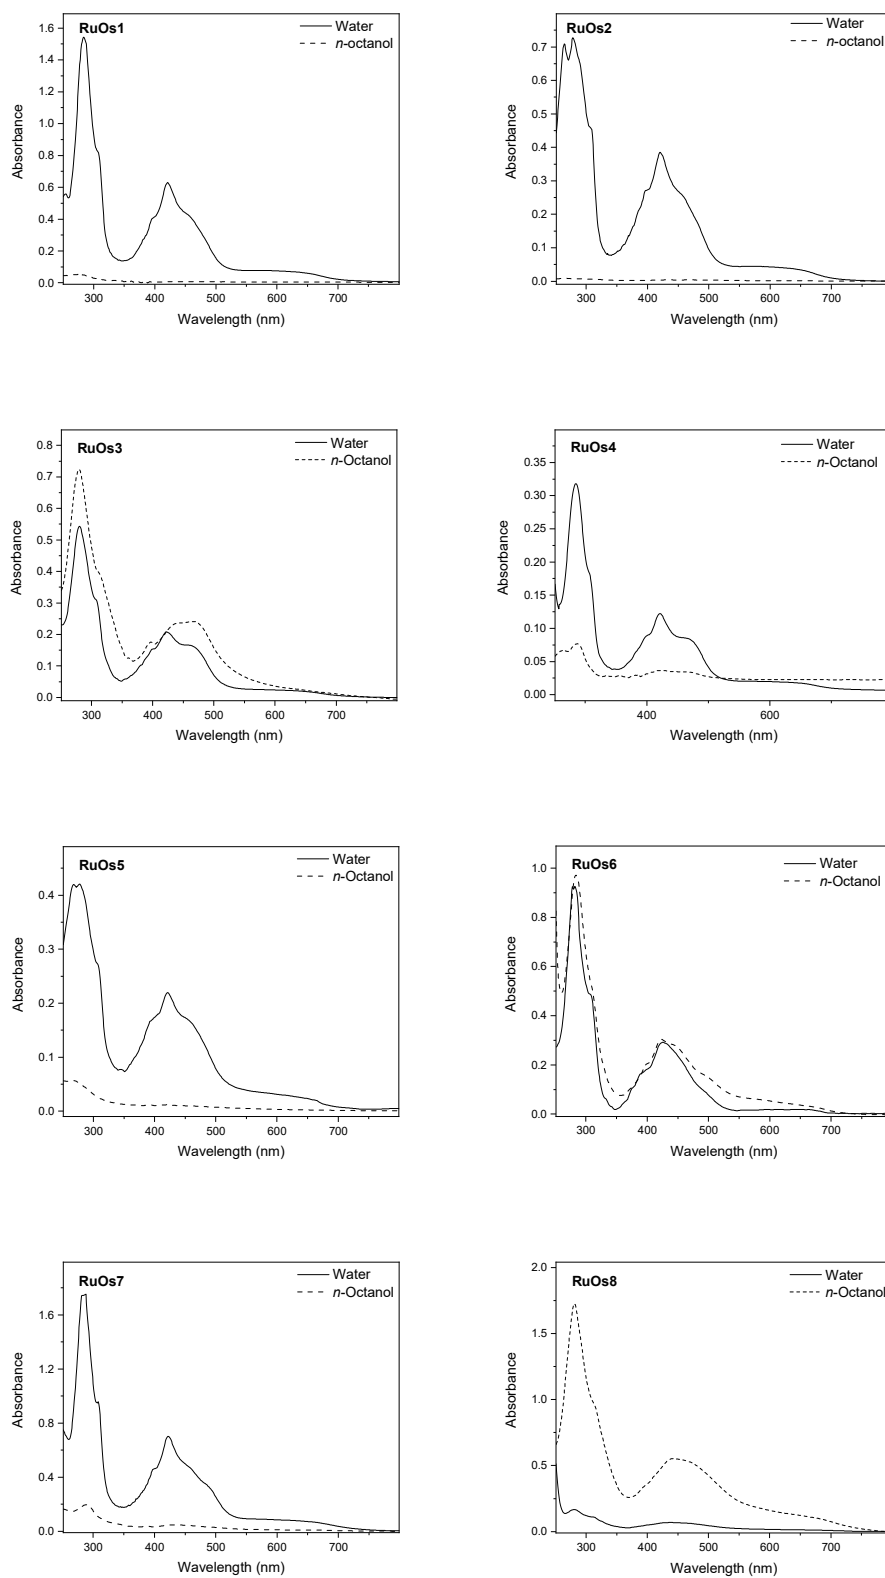

**Figure S33.** Absorption spectra of **RuOs1–8** in the *n*-octanol and water phase (10  $\mu$ M in total), by which the partition coefficients ( $\log K_{O/W}$ ) were calculated.

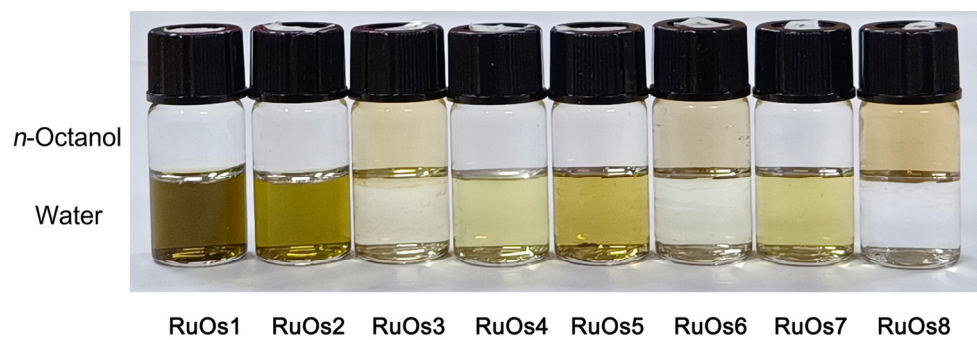

**Figure S34.** Octanol/water partition of **RuOs1–8** (10  $\mu$ M in total) at 25  $^{\circ}$ C.

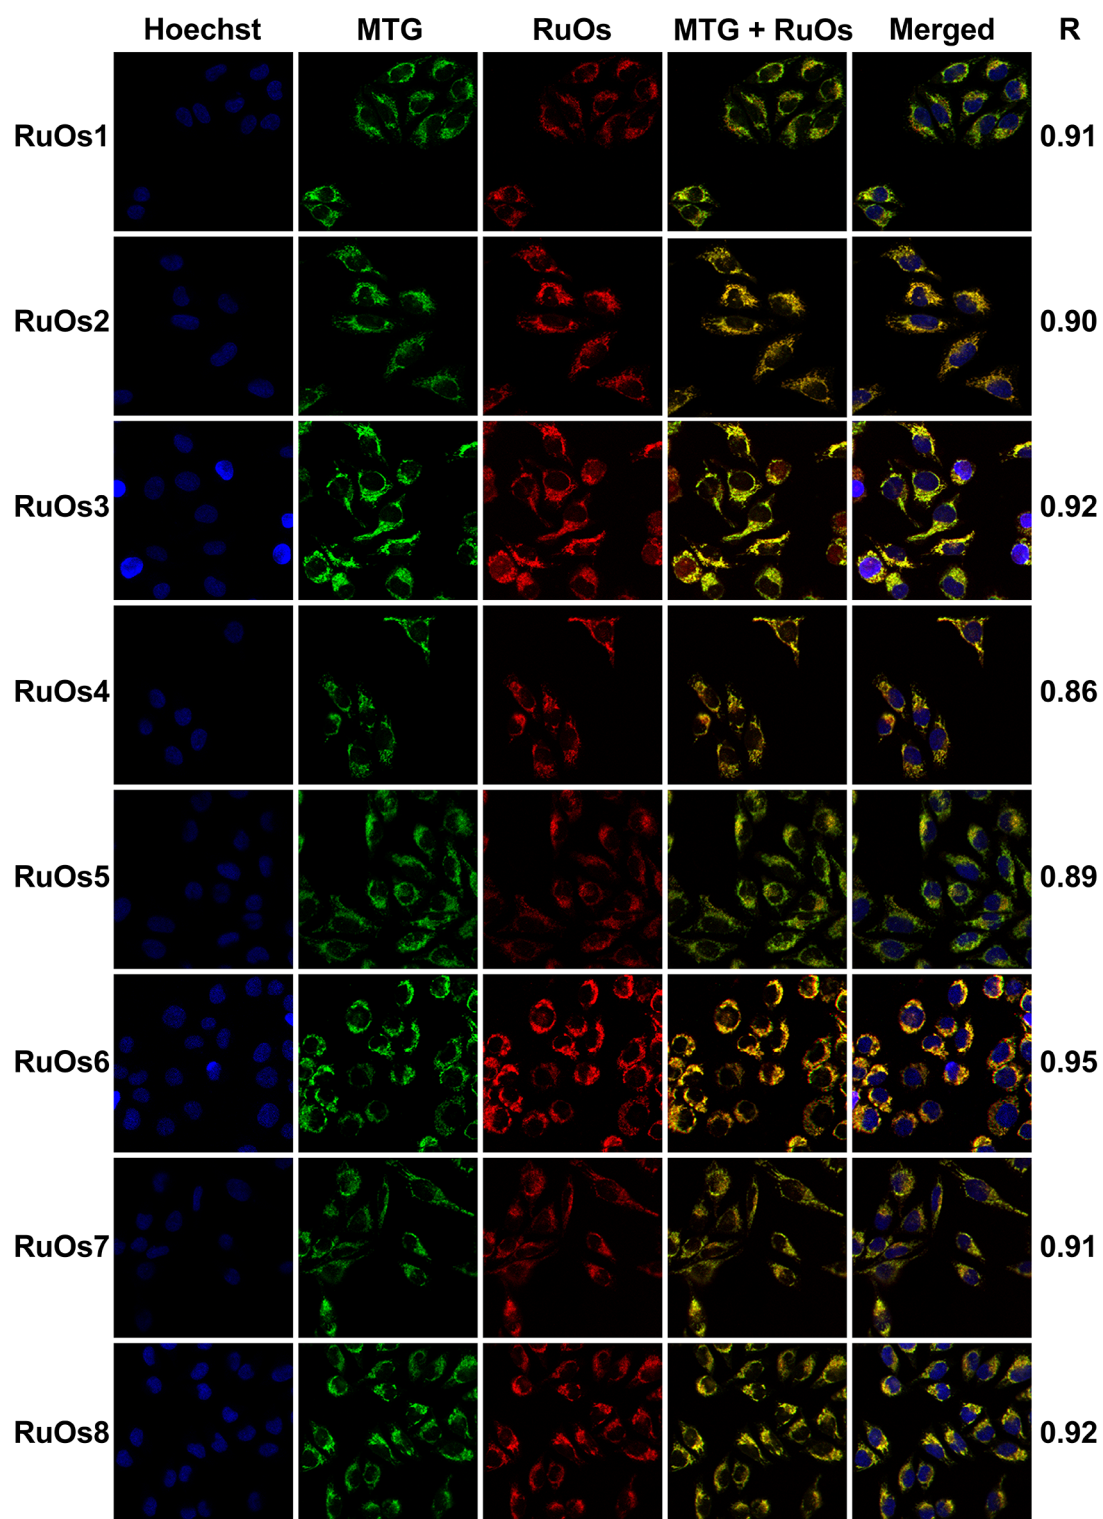

**Figure S35.** Cellular colocalization of **RuOs1-8** with Hoechst 33342 (Hoechst) and MitoTracker Green (MTG) in A375 cells by CLSM.

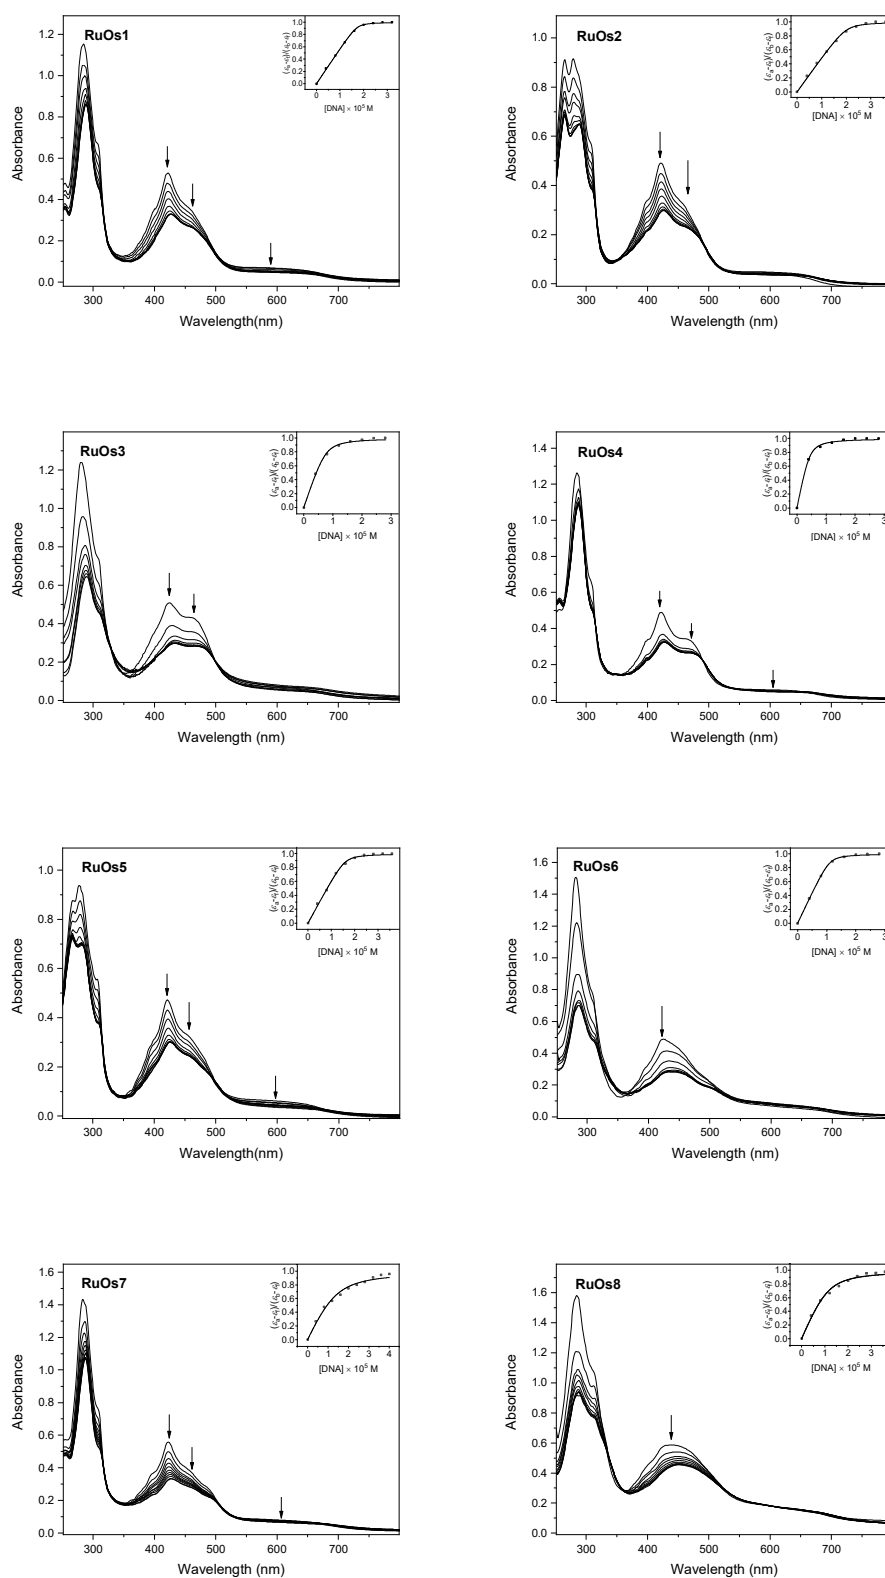

**Figure S36.** Absorption spectra of **RuOs1-8** in 5 mM Tris-HCl and 50 mM NaCl buffer (pH 7.0) in the presence of increasing amounts of CT-DNA. Insets show the nonlinear fitting by which the binding constants  $K_b$  were calculated.

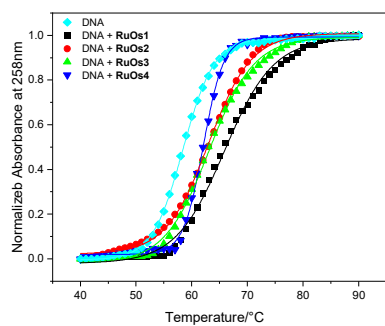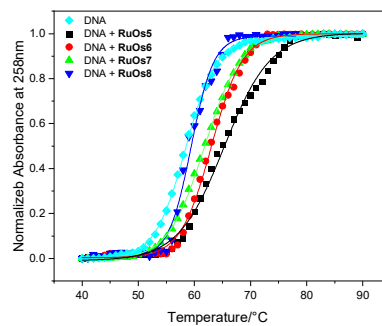

**Figure S37.** The melting curves of CT-DNA (100 μM) at 260 nm in the absence and the presence of **RuOs1–RuOs8** (10 μM) in PBS

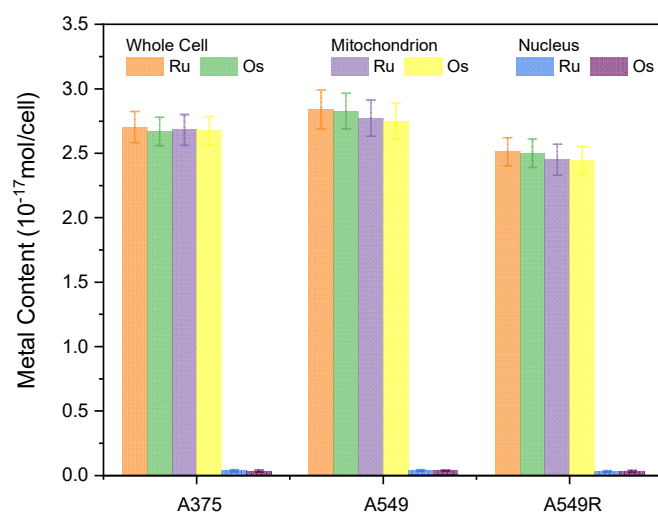

**Figure S38.** The distribution of ruthenium and osmium for **RuOs6** in various regions of A375, A549 and A549R cells as determined by inductively coupled plasma mass spectrometry (ICP-MS).

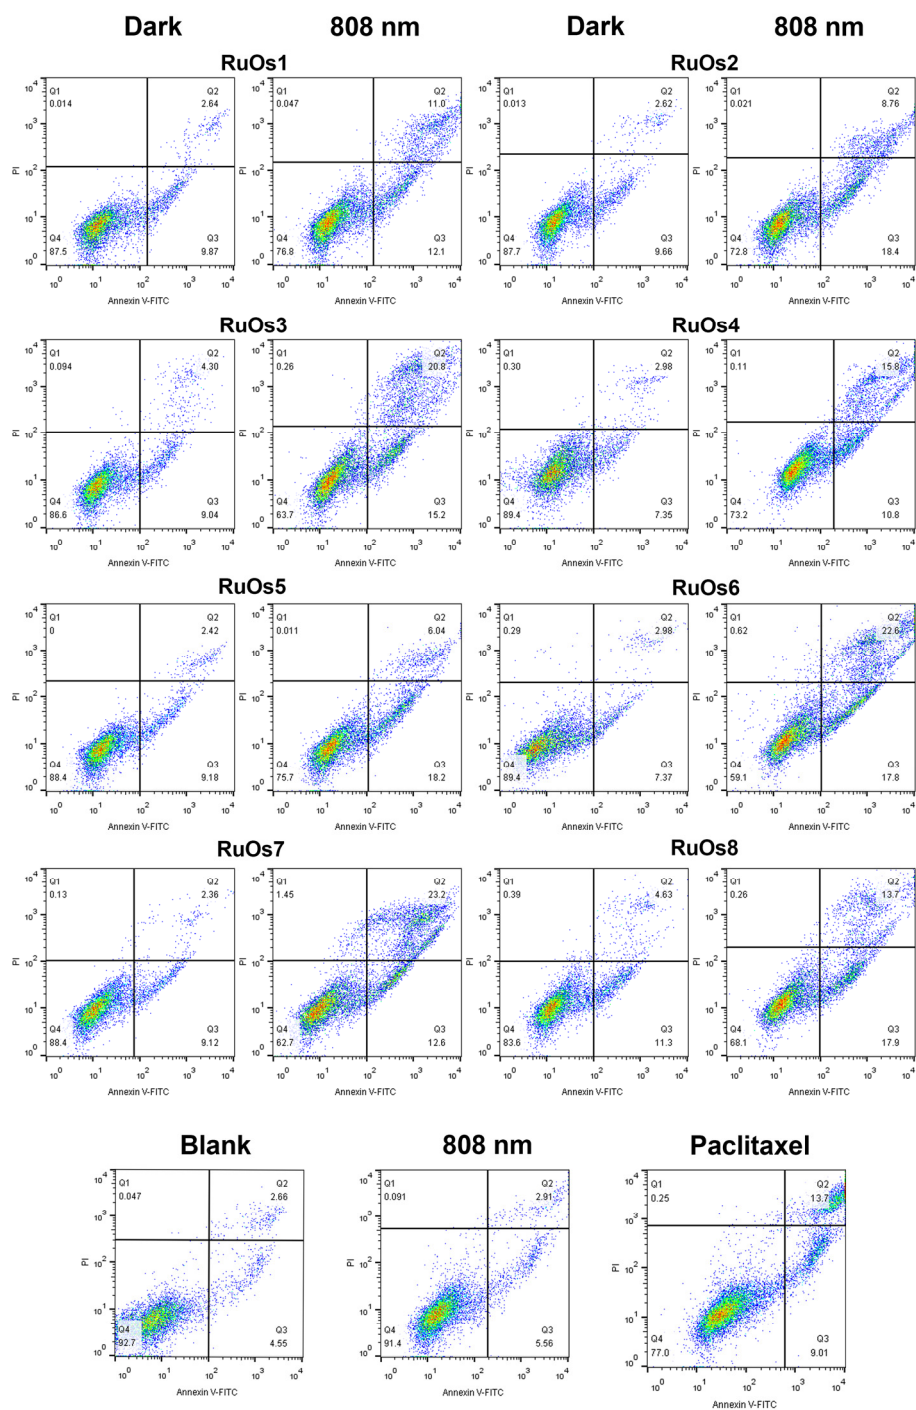

**Figure S39.** Detection of A375 cells apoptosis with Annexin V-FITC and PI by flow cytometry in the presence of RuOs1–8 (5  $\mu$ M) in the dark and under 808 nm LPL (100 mW cm<sup>-2</sup>) irradiation. Paclitaxel was the positive control.

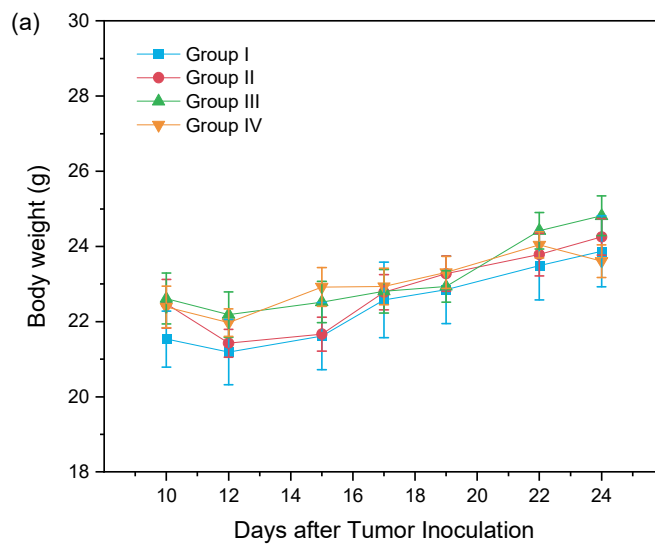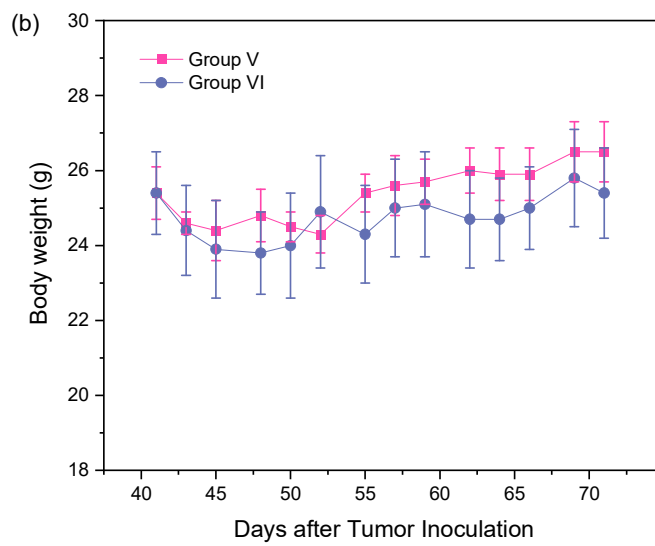

**Figure S40.** Body weight curves of mice in Group I–IV (a) and Group V–VI (b) after various treatments.



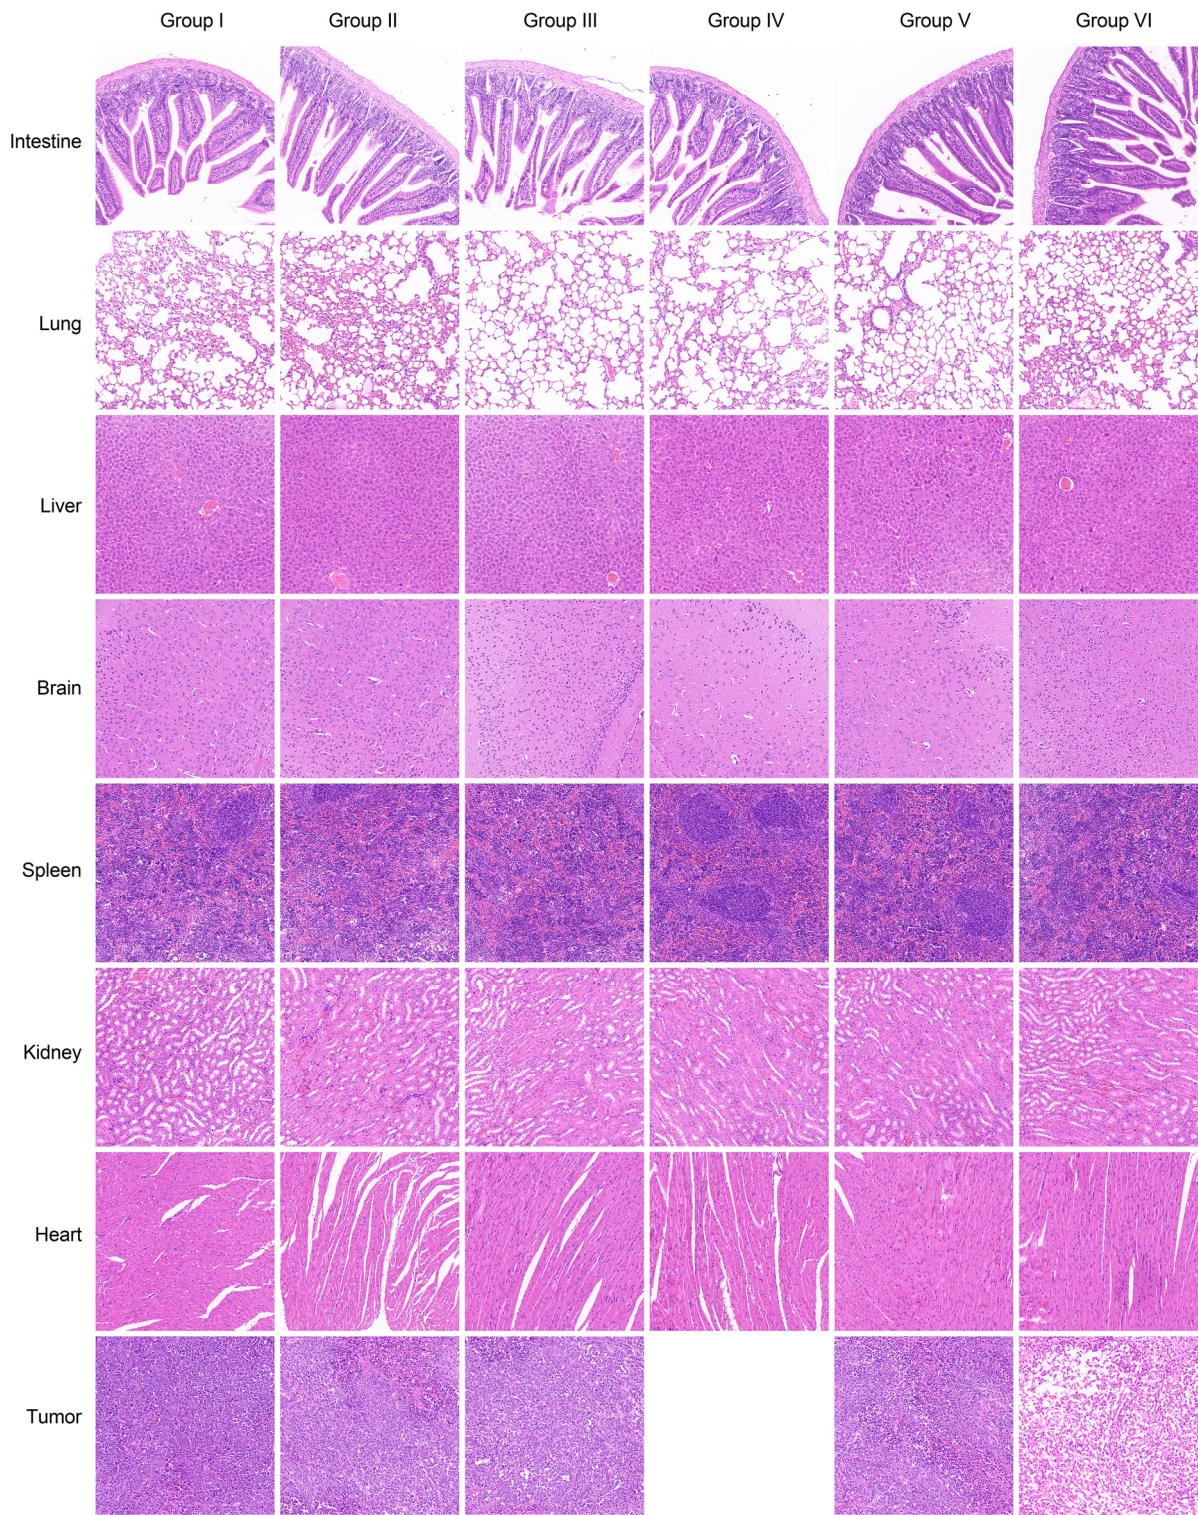

**Figure S41.** H&E staining of organ slices from different groups.

Table S1. Experimental and computational absorption spectral data of **RuOs1–8**, together with the calculated excitation energies ( $\Delta E$ ), oscillator strengths ( $f > 0.01$ ), by TDDFT Method at MN15-D3(BJ)/LanL2DZ level in aqueous solution (CPCM for water, Gaussian 16).

| Compound     | $\lambda_{\text{exp}}/\text{nm}$ ( $\epsilon/\times 10^4 \text{M}^{-1} \text{cm}^{-1}$ ) | $\lambda_{\text{cal}}/\text{nm}$ | $f$    | $\Delta E/\text{eV}$ | Excied State | Character       |
|--------------|------------------------------------------------------------------------------------------|----------------------------------|--------|----------------------|--------------|-----------------|
| <b>RuOs1</b> | 657(0.51)                                                                                | 561.19                           | 0.1480 | 2.21                 | S5           | MLCT / IL(pppp) |
|              |                                                                                          | 478.05                           | 0.1372 | 2.59                 | S22          | MLCT / IL(pppp) |
|              | 466(4.36)                                                                                | 444.17                           | 0.0223 | 2.79                 | S32          | MLCT            |
|              |                                                                                          | 442.49                           | 0.1037 | 2.80                 | S33          | MLCT / IL(pppp) |
|              | 424(5.22)                                                                                | 417.40                           | 0.2785 | 2.97                 | S42          | MLCT / IL(bpy)  |
|              |                                                                                          | 415.83                           | 0.1953 | 2.98                 | S43          | MLCT            |
| <b>RuOs2</b> | 638(0.44)                                                                                | 560.19                           | 0.1508 | 2.21                 | S5           | MLCT / IL(pppp) |
|              |                                                                                          | 478.48                           | 0.1419 | 2.59                 | S22          | MLCT / IL(pppp) |
|              | 458(3.36)                                                                                | 443.94                           | 0.0223 | 2.79                 | S33          | MLCT            |
|              |                                                                                          | 442.13                           | 0.1025 | 2.80                 | S34          | MLCT / IL(pppp) |
|              | 422(5.03)                                                                                | 417.27                           | 0.2855 | 2.97                 | S41          | MLCT / IL(bpy)  |
|              |                                                                                          | 415.82                           | 0.1946 | 2.98                 | S42          | MLCT            |
| <b>RuOs3</b> | 649(0.61)                                                                                | 561.21                           | 0.1582 | 2.21                 | S5           | MLCT / IL(pppp) |
|              |                                                                                          | 488.57                           | 0.1309 | 2.54                 | S23          | MLCT / IL(pppp) |
|              | 458(3.60)                                                                                | 443.97                           | 0.0215 | 2.79                 | S35          | MLCT            |
|              |                                                                                          | 442.72                           | 0.1102 | 2.80                 | S36          | MLCT / IL(pppp) |
|              | 422(5.35)                                                                                | 417.52                           | 0.3052 | 2.97                 | S42          | MLCT            |
|              |                                                                                          | 415.85                           | 0.1948 | 2.98                 | S44          | MLCT            |
| <b>RuOs4</b> | 649(0.51)                                                                                | 559.53                           | 0.1607 | 2.22                 | S5           | MLCT / IL(pppp) |
|              |                                                                                          | 501.85                           | 0.1009 | 2.47                 | S17          | MLCT / IL(pppp) |
|              | 467(3.38)                                                                                | 444.30                           | 0.0224 | 2.79                 | S31          | MLCT            |
|              |                                                                                          | 442.57                           | 0.1108 | 2.80                 | S32          | MLCT / IL(pppp) |
|              | 421(4.88)                                                                                | 417.28                           | 0.2959 | 2.97                 | S40          | MLCT / IL(pppp) |
|              |                                                                                          | 415.87                           | 0.1851 | 2.98                 | S41          | MLCT            |
| <b>RuOs5</b> | 643(0.62)                                                                                | 563.94                           | 0.1509 | 2.20                 | S4           | MLCT / IL(pppp) |
|              |                                                                                          | 477.33                           | 0.1411 | 2.60                 | S23          | MLCT / IL(pppp) |
|              | 456(3.41)                                                                                | 439.23                           | 0.1373 | 2.82                 | S33          | MLCT            |
|              |                                                                                          | 439.15                           | 0.0350 | 2.82                 | S44          | MLCT / IL(bpy)  |
|              | 422(4.95)                                                                                | 416.28                           | 0.1990 | 2.98                 | S45          | MLCT            |
|              |                                                                                          | 413.44                           | 0.1498 | 3.00                 | S51          | MLCT            |
| <b>RuOs6</b> | 655(0.41)                                                                                | 575.81                           | 0.1529 | 2.15                 | S6           | MLCT / IL(pppp) |
|              |                                                                                          | 489.62                           | 0.0131 | 2.53                 | S20          | MLCT            |
|              | 477.76                                                                                   | 477.76                           | 0.1652 | 2.60                 | S23          | MLCT / IL(pppp) |
|              |                                                                                          | 476.06                           | 0.0180 | 2.60                 | S25          | MLCT / LLCT     |
|              | 456(4.03)                                                                                | 455.59                           | 0.1234 | 2.72                 | S29          | MLCT            |
|              |                                                                                          |                                  |        |                      |              |                 |

|              |           |        |        |      |     |                 |
|--------------|-----------|--------|--------|------|-----|-----------------|
|              |           | 448.82 | 0.1398 | 2.76 | S33 | MLCT / IL(pppp) |
|              |           | 428.84 | 0.2202 | 2.89 | S41 | MLCT            |
|              |           | 428.35 | 0.2645 | 2.89 | S42 | MLCT            |
|              | 423(4.88) | 414.10 | 0.1282 | 2.99 | S48 | MLCT            |
|              |           | 407.44 | 0.2262 | 3.04 | S51 | MLCT / LLCT     |
|              |           | 407.11 | 0.1514 | 3.05 | S52 | MLCT            |
|              |           | 400.67 | 0.1061 | 3.09 | S56 | MLCT            |
| <b>RuOs7</b> | 666(0.62) | 593.66 | 0.1281 | 2.09 | S4  | MLCT / IL(pppp) |
|              |           | 476.60 | 0.1592 | 2.60 | S23 | MLCT            |
|              | 458(3.32) | 445.82 | 0.0773 | 2.78 | S31 | MLCT            |
|              |           | 433.11 | 0.0407 | 2.86 | S35 | MLCT            |
|              |           | 432.04 | 0.2339 | 2.87 | S37 | MLCT            |
|              | 423(4.87) | 417.86 | 0.0543 | 2.97 | S42 | MLCT            |
|              |           | 411.07 | 0.2410 | 3.02 | S45 | MLCT / IL(pppp) |
|              |           | 405.65 | 0.1418 | 3.06 | S47 | MLCT/LLCT       |
|              |           | 403.71 | 0.0144 | 3.07 | S48 | MLCT            |
| <b>RuOs8</b> | 667(1.40) | 623.47 | 0.1036 | 1.99 | S4  | MLCT / IL(pppp) |
|              |           | 509.09 | 0.1264 | 2.44 | S18 | MLCT / IL(pppp) |
|              |           | 477.75 | 0.0106 | 2.60 | S25 | MLCT / IL(pppp) |
|              | 462(3.92) | 445.22 | 0.0727 | 2.78 | S33 | MLCT            |
|              |           | 440.78 | 0.2193 | 2.81 | S35 | MLCT            |
|              |           | 427.22 | 0.1060 | 2.90 | S43 | MLCT            |
|              | 420(4.85) | 425.35 | 0.1241 | 2.91 | S44 | MLCT            |
|              |           | 424.71 | 0.3097 | 2.92 | S45 | MLCT            |
|              |           | 411.33 | 0.1027 | 3.01 | S52 | MLCT            |
|              |           | 404.43 | 0.1336 | 3.07 | S56 | MLCT            |
|              |           | 401.26 | 0.1706 | 3.09 | S58 | MLCT/LLCT       |

**Table S2.** Cartesian coordinates of optimized **RuOs1–8** for the ground state (S0), first excited singlet state (F1) and first excited triplet state (T1), by MN15-D3(BJ)/LanL2DZ (CPCM for water, Gaussian 16).

| RuOs1 | S0        |           |           | S1        |           |           | T1        |           |           |
|-------|-----------|-----------|-----------|-----------|-----------|-----------|-----------|-----------|-----------|
|       | Atom      | X         | Y         | Z         | X         | Y         | Z         | X         | Y         |
| Os    | 0         | 0         | 7.24517   | 0         | 0         | 7.251018  | 0         | 0         | 7.259506  |
| Ru    | 0         | 0         | -7.973187 | 0         | 0         | -7.983622 | 0         | 0         | -7.989991 |
| N     | 0.005017  | 1.417183  | 0.808594  | 0.004635  | 1.426203  | 0.812102  | -0.025027 | 1.427439  | 0.806386  |
| N     | -0.005017 | -1.417183 | 0.808594  | -0.004635 | -1.426203 | 0.812102  | 0.025027  | -1.427439 | 0.806386  |
| N     | -0.007003 | 1.314452  | 5.654475  | -0.011433 | 1.335139  | 5.678042  | -0.093564 | 1.325899  | 5.66638   |
| N     | 0.007003  | -1.314452 | 5.654475  | 0.011433  | -1.335139 | 5.678042  | 0.093564  | -1.325899 | 5.66638   |
| N     | 2.035542  | 0.30988   | 7.350062  | 2.02376   | 0.394201  | 7.304424  | 1.988773  | 0.560227  | 7.31544   |
| N     | 0.126574  | 1.416397  | 8.734199  | 0.105136  | 1.383463  | 8.78295   | -0.00109  | 1.385094  | 8.792875  |
| N     | -2.035542 | -0.30988  | 7.350062  | -2.02376  | -0.394201 | 7.304424  | -1.988773 | -0.560227 | 7.31544   |
| N     | -0.126574 | -1.416397 | 8.734199  | -0.105136 | -1.383463 | 8.78295   | 0.00109   | -1.385094 | 8.792875  |
| N     | -2.049976 | 0.286571  | -8.073522 | -2.049215 | 0.284651  | -8.077861 | -2.020311 | 0.444981  | -8.081078 |
| N     | -0.127871 | 1.42796   | -9.463393 | -0.133437 | 1.430077  | -9.47121  | -0.023966 | 1.433042  | -9.48069  |
| N     | 2.049976  | -0.286571 | -8.073522 | 2.049215  | -0.284651 | -8.077861 | 2.020311  | -0.444981 | -8.081078 |
| N     | 0.127871  | -1.42796  | -9.463393 | 0.133437  | -1.430077 | -9.47121  | 0.023966  | -1.433042 | -9.48069  |
| N     | -0.005033 | 1.417199  | -1.537056 | -0.004688 | 1.417394  | -1.530709 | 0.024369  | 1.423124  | -1.534146 |
| N     | 0.005033  | -1.417199 | -1.537056 | 0.004688  | -1.417394 | -1.530709 | -0.024369 | -1.423124 | -1.534146 |
| N     | -0.004206 | -1.331167 | -6.376902 | -0.003708 | -1.335301 | -6.389815 | -0.092759 | -1.3332   | -6.396058 |
| N     | 0.004206  | 1.331167  | -6.376902 | 0.003708  | 1.335301  | -6.389815 | 0.092759  | 1.3332    | -6.396058 |
| C     | -0.004936 | -0.728203 | 1.951738  | -0.004352 | -0.725028 | 1.964333  | 0.021812  | -0.713692 | 1.965791  |
| C     | 0.004936  | 0.728203  | 1.951738  | 0.004352  | 0.725028  | 1.964333  | -0.021812 | 0.713692  | 1.965791  |
| C     | 0.010715  | 1.457284  | 3.222236  | 0.008236  | 1.439265  | 3.229444  | -0.064948 | 1.435359  | 3.227042  |
| C     | 0.00252   | 0.722477  | 4.41714   | -0.004305 | 0.708284  | 4.443623  | -0.043815 | 0.714441  | 4.43498   |
| C     | -0.00252  | -0.722477 | 4.41714   | 0.004305  | -0.708284 | 4.443623  | 0.043815  | -0.714441 | 4.43498   |
| C     | -0.010715 | -1.457284 | 3.222236  | -0.008236 | -1.439265 | 3.229444  | 0.064948  | -1.435359 | 3.227042  |
| C     | 0.020298  | 2.864395  | 3.299205  | 0.024551  | 2.847504  | 3.315839  | -0.133532 | 2.848077  | 3.312408  |
| C     | 0.021255  | 3.466454  | 4.56276   | 0.035039  | 3.469048  | 4.57016   | -0.173621 | 3.459881  | 4.565811  |
| C     | 0.007068  | 2.669274  | 5.72058   | 0.021962  | 2.680417  | 5.738355  | -0.14746  | 2.672076  | 5.735929  |
| C     | -0.007068 | -2.669274 | 5.72058   | -0.021962 | -2.680417 | 5.738355  | 0.14746   | -2.672076 | 5.735929  |
| C     | -0.021255 | -3.466454 | 4.56276   | -0.035039 | -3.469048 | 4.57016   | 0.173621  | -3.459881 | 4.565811  |
| C     | -0.020298 | -2.864395 | 3.299205  | -0.024551 | -2.847504 | 3.315839  | 0.133532  | -2.848077 | 3.312408  |
| C     | 4.764083  | 0.901396  | 7.587615  | 4.718962  | 1.086031  | 7.479499  | 4.617739  | 1.470626  | 7.482452  |
| C     | 4.31472   | -0.042446 | 6.646303  | 4.27995   | 0.174625  | 6.504496  | 4.25408   | 0.519203  | 6.514114  |
| C     | 2.946978  | -0.312181 | 6.553538  | 2.920992  | -0.144558 | 6.438319  | 2.926521  | 0.088552  | 6.452533  |
| C     | 2.465306  | 1.233509  | 8.270649  | 2.438794  | 1.295584  | 8.253281  | 2.329228  | 1.496116  | 8.259817  |
| C     | 3.825757  | 1.54406   | 8.406027  | 3.785989  | 1.656701  | 8.358541  | 3.64274   | 1.966843  | 8.360681  |
| C     | 1.388779  | 1.84144   | 9.068681  | 1.35969   | 1.84209   | 9.094234  | 1.211248  | 1.947568  | 9.103943  |
| C     | -0.945205 | 1.909365  | 9.412556  | -0.969474 | 1.796647  | 9.502482  | -1.108277 | 1.70499   | 9.513033  |
| C     | -0.801467 | 2.845643  | 10.43966  | -0.835879 | 2.707517  | 10.554298 | -1.050596 | 2.619602  | 10.567419 |
| C     | 1.59159   | 2.778163  | 10.091918 | 1.552471  | 2.74888   | 10.14258  | 1.326748  | 2.863435  | 10.155386 |
| C     | 0.487439  | 3.289334  | 10.786816 | 0.443046  | 3.190519  | 10.878509 | 0.184178  | 3.206817  | 10.89323  |
| C     | -4.764083 | -0.901396 | 7.587615  | -4.718962 | -1.086031 | 7.479499  | -4.617739 | -1.470626 | 7.482452  |
| C     | -4.31472  | 0.042446  | 6.646303  | -4.27995  | -0.174625 | 6.504496  | -4.25408  | -0.519203 | 6.514114  |
| C     | -2.946978 | 0.312181  | 6.553538  | -2.920992 | 0.144558  | 6.438319  | -2.926521 | -0.088552 | 6.452533  |

|   |           |           |            |           |           |            |           |           |            |
|---|-----------|-----------|------------|-----------|-----------|------------|-----------|-----------|------------|
| C | -2.465306 | -1.233509 | 8.270649   | -2.438794 | -1.295584 | 8.253281   | -2.329228 | -1.496116 | 8.259817   |
| C | -3.825757 | -1.54406  | 8.406027   | -3.785989 | -1.656701 | 8.358541   | -3.64274  | -1.966843 | 8.360681   |
| C | -1.388779 | -1.84144  | 9.068681   | -1.35969  | -1.84209  | 9.094234   | -1.211248 | -1.947568 | 9.103943   |
| C | 0.945205  | -1.909365 | 9.412556   | 0.969474  | -1.796647 | 9.502482   | 1.108277  | -1.70499  | 9.513033   |
| C | 0.801467  | -2.845643 | 10.43966   | 0.835879  | -2.707517 | 10.554298  | 1.050596  | -2.619602 | 10.567419  |
| C | -1.59159  | -2.778163 | 10.091918  | -1.552471 | -2.74888  | 10.14258   | -1.326748 | -2.863435 | 10.155386  |
| C | -0.487439 | -3.289334 | 10.786816  | -0.443046 | -3.190519 | 10.878509  | -0.184178 | -3.206817 | 10.89323   |
| C | -4.772764 | 0.861847  | -8.325844  | -4.772863 | 0.863778  | -8.313233  | -4.687838 | 1.248358  | -8.299559  |
| C | -4.328095 | -0.086067 | -7.388124  | -4.323795 | -0.087084 | -7.380439  | -4.312721 | 0.266016  | -7.366661  |
| C | -2.95679  | -0.347014 | -7.2892    | -2.95221  | -0.349762 | -7.289693  | -2.967015 | -0.109384 | -7.2841    |
| C | -2.471189 | 1.212059  | -8.990189  | -2.47453  | 1.213701  | -8.988998  | -2.373444 | 1.403489  | -8.992696  |
| C | -3.83248  | 1.51697   | -9.134114  | -3.836398 | 1.520463  | -9.12462   | -3.705893 | 1.822795  | -9.119579  |
| C | -1.394527 | 1.837518  | -9.783883  | -1.401126 | 1.841173  | -9.78547   | -1.256733 | 1.937483  | -9.797813  |
| C | 0.935343  | 1.93498   | -10.135206 | 0.927242  | 1.938869  | -10.145754 | 1.07201   | 1.854086  | -10.159438 |
| C | 0.780399  | 2.880736  | -11.154991 | 0.76874   | 2.887692  | -11.162129 | 0.98542   | 2.803216  | -11.184196 |
| C | -1.612464 | 2.781723  | -10.797631 | -1.622804 | 2.78844   | -10.795782 | -1.406649 | 2.88838   | -10.817851 |
| C | -0.514624 | 3.311217  | -11.491208 | -0.527569 | 3.319654  | -11.492069 | -0.274738 | 3.328146  | -11.519204 |
| C | 4.772764  | -0.861847 | -8.325844  | 4.772863  | -0.863778 | -8.313233  | 4.687838  | -1.248358 | -8.299559  |
| C | 4.328095  | 0.086067  | -7.388124  | 4.323795  | 0.087084  | -7.380439  | 4.312721  | -0.266016 | -7.366661  |
| C | 2.95679   | 0.347014  | -7.2892    | 2.95221   | 0.349762  | -7.289693  | 2.967015  | 0.109384  | -7.2841    |
| C | 2.471189  | -1.212059 | -8.990189  | 2.47453   | -1.213701 | -8.988998  | 2.373444  | -1.403489 | -8.992696  |
| C | 3.83248   | -1.51697  | -9.134114  | 3.836398  | -1.520463 | -9.12462   | 3.705893  | -1.822795 | -9.119579  |
| C | 1.394527  | -1.837518 | -9.783883  | 1.401126  | -1.841173 | -9.78547   | 1.256733  | -1.937483 | -9.797813  |
| C | -0.935343 | -1.93498  | -10.135206 | -0.927242 | -1.938869 | -10.145754 | -1.07201  | -1.854086 | -10.159438 |
| C | -0.780399 | -2.880736 | -11.154991 | -0.76874  | -2.887692 | -11.162129 | -0.98542  | -2.803216 | -11.184196 |
| C | 1.612464  | -2.781723 | -10.797631 | 1.622804  | -2.78844  | -10.795782 | 1.406649  | -2.88838  | -10.817851 |
| C | 0.514624  | -3.311217 | -11.491208 | 0.527569  | -3.319654 | -11.492069 | 0.274738  | -3.328146 | -11.519204 |
| C | 0         | 0.719682  | -0.364304  | 0         | 0.728847  | -0.366314  | 0         | 0.733426  | -0.36544   |
| C | 0         | -0.719682 | -0.364304  | 0         | -0.728847 | -0.366314  | 0         | -0.733426 | -0.36544   |
| C | 0.004937  | -0.727645 | -2.680016  | 0.004347  | -0.713817 | -2.692768  | -0.021492 | -0.712346 | -2.697338  |
| C | -0.004937 | 0.727645  | -2.680016  | -0.004347 | 0.713817  | -2.692768  | 0.021492  | 0.712346  | -2.697338  |
| C | 0.011159  | -1.454635 | -3.951147  | 0.009772  | -1.442687 | -3.955393  | -0.063767 | -1.437851 | -3.959059  |
| C | 0.002919  | -0.725618 | -5.1506    | 0.002743  | -0.721717 | -5.163516  | -0.040162 | -0.719397 | -5.170087  |
| C | -0.002919 | 0.725618  | -5.1506    | -0.002743 | 0.721717  | -5.163516  | 0.040162  | 0.719397  | -5.170087  |
| C | -0.011159 | 1.454635  | -3.951147  | -0.009772 | 1.442687  | -3.955393  | 0.063767  | 1.437851  | -3.959059  |
| C | 0.020724  | -2.863638 | -4.021792  | 0.018019  | -2.8557   | -4.02738   | -0.136096 | -2.850302 | -4.031714  |
| C | 0.021648  | -3.476066 | -5.278281  | 0.018939  | -3.472046 | -5.279307  | -0.183055 | -3.466181 | -5.282421  |
| C | 0.008506  | -2.680761 | -6.440312  | 0.007638  | -2.681509 | -6.4488    | -0.159832 | -2.677197 | -6.453796  |
| C | -0.020724 | 2.863638  | -4.021792  | -0.018019 | 2.8557    | -4.02738   | 0.136096  | 2.850302  | -4.031714  |
| C | -0.021648 | 3.476066  | -5.278281  | -0.018939 | 3.472046  | -5.279307  | 0.183055  | 3.466181  | -5.282421  |
| C | -0.008506 | 2.680761  | -6.440312  | -0.007638 | 2.681509  | -6.4488    | 0.159832  | 2.677197  | -6.453796  |
| H | 0.026235  | 3.451466  | 2.387485   | 0.032522  | 3.42837   | 2.399193   | -0.152712 | 3.427735  | 2.395774   |
| H | 0.029672  | 4.544713  | 4.667647   | 0.051105  | 4.547809  | 4.662608   | -0.224995 | 4.537509  | 4.661897   |
| H | -0.004233 | 3.111385  | 6.710403   | 0.022307  | 3.134807  | 6.723436   | -0.182795 | 3.123426  | 6.721174   |
| H | 0.004233  | -3.111385 | 6.710403   | -0.022307 | -3.134807 | 6.723436   | 0.182795  | -3.123426 | 6.721174   |
| H | -0.029672 | -4.544713 | 4.667647   | -0.051105 | -4.547809 | 4.662608   | 0.224995  | -4.537509 | 4.661897   |
| H | -0.026235 | -3.451466 | 2.387485   | -0.032522 | -3.42837  | 2.399193   | 0.152712  | -3.427735 | 2.395774   |
| H | 5.00673   | -0.562724 | 5.994422   | 4.970291  | -0.280674 | 5.805056   | 4.97858   | 0.117213  | 5.816549   |
| H | 2.56156   | -1.038553 | 5.847435   | 2.539449  | -0.843342 | 5.703545   | 2.603982  | -0.645862 | 5.724125   |

|   |           |           |            |           |           |            |           |           |            |
|---|-----------|-----------|------------|-----------|-----------|------------|-----------|-----------|------------|
| H | 4.149772  | 2.277006  | 9.135803   | 4.107765  | 2.372402  | 9.105302   | 3.906032  | 2.708564  | 9.104975   |
| H | -1.920822 | 1.545322  | 9.1119     | -1.936894 | 1.399343  | 9.217976   | -2.03936  | 1.229785  | 9.22628    |
| H | -1.682257 | 3.214176  | 10.952441  | -1.714991 | 3.023305  | 11.102581  | -1.952751 | 2.858781  | 11.117038  |
| H | 2.594154  | 3.102827  | 10.345689  | 2.545949  | 3.104918  | 10.387147  | 2.286467  | 3.302283  | 10.40025   |
| H | -5.00673  | 0.562724  | 5.994422   | -4.970291 | 0.280674  | 5.805056   | -4.97858  | -0.117213 | 5.816549   |
| H | -2.56156  | 1.038553  | 5.847435   | -2.539449 | 0.843342  | 5.703545   | -2.603982 | 0.645862  | 5.724125   |
| H | -4.149772 | -2.277006 | 9.135803   | -4.107765 | -2.372402 | 9.105302   | -3.906032 | -2.708564 | 9.104975   |
| H | 1.920822  | -1.545322 | 9.1119     | 1.936894  | -1.399343 | 9.217976   | 2.03936   | -1.229785 | 9.22628    |
| H | 1.682257  | -3.214176 | 10.952441  | 1.714991  | -3.023305 | 11.102581  | 1.952751  | -2.858781 | 11.117038  |
| H | -2.594154 | -3.102827 | 10.345689  | -2.545949 | -3.104918 | 10.387147  | -2.286467 | -3.302283 | 10.40025   |
| H | -5.022705 | -0.614485 | -6.745661  | -5.015465 | -0.616139 | -6.735254  | -5.041229 | -0.201537 | -6.714531  |
| H | -2.570482 | -1.074736 | -6.584645  | -2.561459 | -1.078684 | -6.588729  | -2.632279 | -0.865363 | -6.582827  |
| H | -4.158484 | 2.251935  | -9.860838  | -4.165503 | 2.258359  | -9.847019  | -3.977736 | 2.585132  | -9.840472  |
| H | 1.915312  | 1.57685   | -9.840885  | 1.90803   | 1.579     | -9.855907  | 2.022898  | 1.423468  | -9.866294  |
| H | 1.654625  | 3.264486  | -11.667798 | 1.641029  | 3.272782  | -11.677317 | 1.884126  | 3.116789  | -11.702493 |
| H | -2.618104 | 3.100323  | -11.046469 | -2.629383 | 3.107963  | -11.039815 | -2.386261 | 3.27999   | -11.066265 |
| H | 5.022705  | 0.614485  | -6.745661  | 5.015465  | 0.616139  | -6.735254  | 5.041229  | 0.201537  | -6.714531  |
| H | 2.570482  | 1.074736  | -6.584645  | 2.561459  | 1.078684  | -6.588729  | 2.632279  | 0.865363  | -6.582827  |
| H | 4.158484  | -2.251935 | -9.860838  | 4.165503  | -2.258359 | -9.847019  | 3.977736  | -2.585132 | -9.840472  |
| H | -1.915312 | -1.57685  | -9.840885  | -1.90803  | -1.579    | -9.855907  | -2.022898 | -1.423468 | -9.866294  |
| H | -1.654625 | -3.264486 | -11.667798 | -1.641029 | -3.272782 | -11.677317 | -1.884126 | -3.116789 | -11.702493 |
| H | 2.618104  | -3.100323 | -11.046469 | 2.629383  | -3.107963 | -11.039815 | 2.386261  | -3.27999  | -11.066265 |
| H | 0.026543  | -3.44341  | -3.105215  | 0.022923  | -3.431059 | -3.107981  | -0.155878 | -3.424039 | -3.111475  |
| H | 0.029607  | -4.554957 | -5.375868  | 0.0257    | -4.551632 | -5.372857  | -0.239776 | -4.544524 | -5.374807  |
| H | -0.000693 | -3.126558 | -7.428766  | -0.000907 | -3.133157 | -7.434838  | -0.203496 | -3.128785 | -7.439038  |
| H | -0.026543 | 3.44341   | -3.105215  | -0.022923 | 3.431059  | -3.107981  | 0.155878  | 3.424039  | -3.111475  |
| H | -0.029607 | 4.554957  | -5.375868  | -0.0257   | 4.551632  | -5.372857  | 0.239776  | 4.544524  | -5.374807  |
| H | 0.000693  | 3.126558  | -7.428766  | 0.000907  | 3.133157  | -7.434838  | 0.203496  | 3.128785  | -7.439038  |
| H | -5.829185 | 1.086308  | -8.425977  | -5.829637 | 1.089574  | -8.406785  | -5.722699 | 1.561618  | -8.385988  |
| H | 5.820023  | 1.130383  | 7.680706   | 5.767385  | 1.353245  | 7.550744   | 5.640701  | 1.823705  | 7.549947   |
| H | 5.829185  | -1.086308 | -8.425977  | 5.829637  | -1.089574 | -8.406785  | 5.722699  | -1.561618 | -8.385988  |
| H | -5.820023 | -1.130383 | 7.680706   | -5.767385 | -1.353245 | 7.550744   | -5.640701 | -1.823705 | 7.549947   |
| H | -0.666852 | 4.042836  | -12.27734  | -0.682581 | 4.053639  | -12.275488 | -0.374413 | 4.063634  | -12.310191 |
| H | 0.627679  | 4.014911  | 11.580535  | 0.575364  | 3.895085  | 11.691972  | 0.25743   | 3.916832  | 11.709478  |
| H | 0.666852  | -4.042836 | -12.27734  | 0.682581  | -4.053639 | -12.275488 | 0.374413  | -4.063634 | -12.310191 |
| H | -0.627679 | -4.014911 | 11.580535  | -0.575364 | -3.895085 | 11.691972  | -0.25743  | -3.916832 | 11.709478  |

| RuOs2 |           | S0        |           |           | S1        |           |           | T1        |           |  |
|-------|-----------|-----------|-----------|-----------|-----------|-----------|-----------|-----------|-----------|--|
| Atom  | X         | Y         | Z         | X         | Y         | Z         | X         | Y         | Z         |  |
| Os    | 0         | 0         | 7.623826  | 0         | 0         | 7.62752   | 0         | 0         | 7.636674  |  |
| Ru    | 0         | 0         | -7.591047 | 0         | 0         | -7.603501 | 0         | 0         | -7.609058 |  |
| N     | -0.000287 | 1.41717   | 1.18714   | -0.009696 | 1.426181  | 1.188841  | -0.024795 | 1.427511  | 1.183555  |  |
| N     | 0.000287  | -1.41717  | 1.18714   | 0.009696  | -1.426181 | 1.188841  | 0.024795  | -1.427511 | 1.183555  |  |
| N     | -0.023844 | 1.314258  | 6.033063  | -0.053102 | 1.334297  | 6.054849  | -0.092664 | 1.325945  | 6.04356   |  |
| N     | 0.023844  | -1.314258 | 6.033063  | 0.053102  | -1.334297 | 6.054849  | 0.092664  | -1.325945 | 6.04356   |  |
| N     | 2.031003  | 0.33894   | 7.728197  | 2.010622  | 0.454712  | 7.682943  | 1.989258  | 0.558501  | 7.692785  |  |
| N     | 0.107016  | 1.416643  | 9.114192  | 0.062433  | 1.385852  | 9.15995   | 0         | 1.385217  | 9.169978  |  |
| N     | -2.031003 | -0.33894  | 7.728197  | -2.010622 | -0.454712 | 7.682943  | -1.989258 | -0.558501 | 7.692785  |  |
| N     | -0.107016 | -1.416643 | 9.114192  | -0.062433 | -1.385852 | 9.15995   | 0         | -1.385217 | 9.169978  |  |
| N     | -2.060388 | 0.252898  | -7.692799 | -2.054918 | 0.286076  | -7.698812 | -2.041299 | 0.370156  | -7.702589 |  |
| N     | -0.106608 | 1.434242  | -9.089367 | -0.087821 | 1.439291  | -9.098529 | -0.03046  | 1.441914  | -9.103913 |  |
| N     | 2.060388  | -0.252898 | -7.692799 | 2.054918  | -0.286076 | -7.698812 | 2.041299  | -0.370156 | -7.702589 |  |
| N     | 0.106608  | -1.434242 | -9.089367 | 0.087821  | -1.439291 | -9.098529 | 0.03046   | -1.441914 | -9.103913 |  |
| N     | 0.000349  | 1.417233  | -1.158535 | 0.008485  | 1.417331  | -1.153998 | 0.024164  | 1.423102  | -1.156967 |  |
| N     | -0.000349 | -1.417233 | -1.158535 | -0.008485 | -1.417331 | -1.153998 | -0.024164 | -1.423102 | -1.156967 |  |
| N     | -0.020729 | -1.330315 | -5.998323 | -0.04188  | -1.334096 | -6.013045 | -0.088091 | -1.33304  | -6.018914 |  |
| N     | 0.020729  | 1.330315  | -5.998323 | 0.04188   | 1.334096  | -6.013045 | 0.088091  | 1.33304   | -6.018914 |  |
| C     | 0.000251  | -0.728187 | 2.330319  | 0.009185  | -0.725016 | 2.341058  | 0.02153   | -0.713726 | 2.342943  |  |
| C     | -0.000251 | 0.728187  | 2.330319  | -0.009185 | 0.725016  | 2.341058  | -0.02153  | 0.713726  | 2.342943  |  |
| C     | -0.004329 | 1.457298  | 3.600804  | -0.030245 | 1.439014  | 3.606141  | -0.064294 | 1.435393  | 3.604204  |  |
| C     | -0.006022 | 0.722451  | 4.795711  | -0.025082 | 0.707832  | 4.820382  | -0.043395 | 0.714458  | 4.812146  |  |
| C     | 0.006022  | -0.722451 | 4.795711  | 0.025082  | -0.707832 | 4.820382  | 0.043395  | -0.714458 | 4.812146  |  |
| C     | 0.004329  | -1.457298 | 3.600804  | 0.030245  | -1.439014 | 3.606141  | 0.064294  | -1.435393 | 3.604204  |  |
| C     | -0.011329 | 2.86443   | 3.677791  | -0.058068 | 2.847     | 3.69253   | -0.132192 | 2.848152  | 3.689607  |  |
| C     | -0.019542 | 3.466436  | 4.941334  | -0.071747 | 3.468544  | 4.946887  | -0.171787 | 3.45997   | 4.943018  |  |
| C     | -0.025842 | 2.669145  | 6.099165  | -0.062626 | 2.679925  | 6.115102  | -0.145857 | 2.672137  | 6.11313   |  |
| C     | 0.025842  | -2.669145 | 6.099165  | 0.062626  | -2.679925 | 6.115102  | 0.145857  | -2.672137 | 6.11313   |  |
| C     | 0.019542  | -3.466436 | 4.941334  | 0.071747  | -3.468544 | 4.946887  | 0.171787  | -3.45997  | 4.943018  |  |
| C     | 0.011329  | -2.86443  | 3.677791  | 0.058068  | -2.847    | 3.69253   | 0.132192  | -2.848152 | 3.689607  |  |
| C     | 4.750493  | 0.972052  | 7.962712  | 4.686297  | 1.21586   | 7.869324  | 4.619314  | 1.465599  | 7.860881  |  |
| C     | 4.314322  | 0.022642  | 7.020799  | 4.274182  | 0.29745   | 6.889132  | 4.254786  | 0.514868  | 6.892187  |  |
| C     | 2.95073   | -0.267875 | 6.92949   | 2.924332  | -0.057158 | 6.817588  | 2.926717  | 0.085872  | 6.830083  |  |
| C     | 2.447959  | 1.267442  | 8.649829  | 2.399076  | 1.362794  | 8.636638  | 2.330567  | 1.493763  | 8.637486  |  |
| C     | 3.80361   | 1.598996  | 8.783474  | 3.736074  | 1.758412  | 8.747751  | 3.644628  | 1.962857  | 8.738879  |  |
| C     | 1.363326  | 1.857542  | 9.450288  | 1.30327   | 1.877213  | 9.476223  | 1.21286   | 1.946419  | 9.48132   |  |
| C     | -0.971467 | 1.893163  | 9.793636  | -1.025199 | 1.768908  | 9.87639   | -1.107005 | 1.706285  | 9.889885  |  |
| C     | -0.840537 | 2.827963  | 10.823814 | -0.919402 | 2.680525  | 10.930778 | -1.04863  | 2.620899  | 10.94423  |  |
| C     | 1.553389  | 2.792981  | 10.477125 | 1.468391  | 2.786271  | 10.527278 | 1.329072  | 2.862183  | 10.532776 |  |
| C     | 0.442296  | 3.287105  | 11.173303 | 0.345201  | 3.196239  | 11.260657 | 0.186688  | 3.206797  | 11.270338 |  |
| C     | -4.750493 | -0.972052 | 7.962712  | -4.686297 | -1.21586  | 7.869324  | -4.619314 | -1.465599 | 7.860881  |  |
| C     | -4.314322 | -0.022642 | 7.020799  | -4.274182 | -0.29745  | 6.889132  | -4.254786 | -0.514868 | 6.892187  |  |
| C     | -2.95073  | 0.267875  | 6.92949   | -2.924332 | 0.057158  | 6.817588  | -2.926717 | -0.085872 | 6.830083  |  |
| C     | -2.447959 | -1.267442 | 8.649829  | -2.399076 | -1.362794 | 8.636638  | -2.330567 | -1.493763 | 8.637486  |  |
| C     | -3.80361  | -1.598996 | 8.783474  | -3.736074 | -1.758412 | 8.747751  | -3.644628 | -1.962857 | 8.738879  |  |
| C     | -1.363326 | -1.857542 | 9.450288  | -1.30327  | -1.877213 | 9.476223  | -1.21286  | -1.946419 | 9.48132   |  |
| C     | 0.971467  | -1.893163 | 9.793636  | 1.025199  | -1.768908 | 9.87639   | 1.107005  | -1.706285 | 9.889885  |  |

|   |           |           |            |           |           |            |           |           |            |
|---|-----------|-----------|------------|-----------|-----------|------------|-----------|-----------|------------|
| C | 0.840537  | -2.827963 | 10.823814  | 0.919402  | -2.680525 | 10.930778  | 1.04863   | -2.620899 | 10.94423   |
| C | -1.553389 | -2.792981 | 10.477125  | -1.468391 | -2.786271 | 10.527278  | -1.329072 | -2.862183 | 10.532776  |
| C | -0.442296 | -3.287105 | 11.173303  | -0.345201 | -3.196239 | 11.260657  | -0.186688 | -3.206797 | 11.270338  |
| C | -4.780512 | 0.862921  | -8.085814  | -4.765797 | 0.947473  | -8.07344   | -4.722792 | 1.145699  | -8.070923  |
| C | -4.382225 | -0.066826 | -7.12891   | -4.378779 | 0.007221  | -7.122034  | -4.373373 | 0.190647  | -7.119667  |
| C | -3.006611 | -0.352372 | -6.955039  | -3.007576 | -0.304257 | -6.957204  | -3.016191 | -0.178794 | -6.958028  |
| C | -2.442679 | 1.1787    | -8.635959  | -2.425812 | 1.2227    | -8.635773  | -2.374664 | 1.321691  | -8.638695  |
| C | -3.79374  | 1.515996  | -8.87359   | -3.771824 | 1.585357  | -8.864571  | -3.704708 | 1.740463  | -8.86496   |
| C | -1.39711  | 1.804468  | -9.389944  | -1.372887 | 1.833376  | -9.392048  | -1.298497 | 1.888231  | -9.396675  |
| C | 0.906119  | 1.988302  | -9.77748   | 0.931278  | 1.979664  | -9.788145  | 1.009405  | 1.940549  | -9.793958  |
| C | 0.678344  | 2.947545  | -10.79353  | 0.715895  | 2.947636  | -10.798654 | 0.833009  | 2.916183  | -10.804641 |
| C | -1.707676 | 2.756072  | -10.386587 | -1.671275 | 2.7951    | -10.382769 | -1.558088 | 2.861289  | -10.387245 |
| C | -0.623284 | 3.335738  | -11.099869 | -0.580152 | 3.359677  | -11.097826 | -0.445338 | 3.380505  | -11.103343 |
| C | 4.780512  | -0.862921 | -8.085814  | 4.765797  | -0.947473 | -8.07344   | 4.722792  | -1.145699 | -8.070923  |
| C | 4.382225  | 0.066826  | -7.12891   | 4.378779  | -0.007221 | -7.122034  | 4.373373  | -0.190647 | -7.119667  |
| C | 3.006611  | 0.352372  | -6.955039  | 3.007576  | 0.304257  | -6.957204  | 3.016191  | 0.178794  | -6.958028  |
| C | 2.442679  | -1.1787   | -8.635959  | 2.425812  | -1.2227   | -8.635773  | 2.374664  | -1.321691 | -8.638695  |
| C | 3.79374   | -1.515996 | -8.87359   | 3.771824  | -1.585357 | -8.864571  | 3.704708  | -1.740463 | -8.86496   |
| C | 1.39711   | -1.804468 | -9.389944  | 1.372887  | -1.833376 | -9.392048  | 1.298497  | -1.888231 | -9.396675  |
| C | -0.906119 | -1.988302 | -9.77748   | -0.931278 | -1.979664 | -9.788145  | -1.009405 | -1.940549 | -9.793958  |
| C | -0.678344 | -2.947545 | -10.79353  | -0.715895 | -2.947636 | -10.798654 | -0.833009 | -2.916183 | -10.804641 |
| C | 1.707676  | -2.756072 | -10.386587 | 1.671275  | -2.7951   | -10.382769 | 1.558088  | -2.861289 | -10.387245 |
| C | 0.623284  | -3.335738 | -11.099869 | 0.580152  | -3.359677 | -11.097826 | 0.445338  | -3.380505 | -11.103343 |
| C | 0         | 0.719675  | 0.01426    | 0         | 0.7288    | 0.010419   | 0.000013  | 0.733431  | 0.01171    |
| C | 0         | -0.719675 | 0.01426    | 0         | -0.7288   | 0.010419   | -0.000013 | -0.733431 | 0.01171    |
| C | -0.000341 | -0.727753 | -2.301512  | -0.007708 | -0.713831 | -2.316041  | -0.02124  | -0.712358 | -2.320207  |
| C | 0.000341  | 0.727753  | -2.301512  | 0.007708  | 0.713831  | -2.316041  | 0.02124   | 0.712358  | -2.320207  |
| C | -0.003783 | -1.454812 | -3.572644  | -0.024302 | -1.442641 | -3.578704  | -0.06234  | -1.438018 | -3.581981  |
| C | -0.005923 | -0.725542 | -4.771823  | -0.016835 | -0.721505 | -4.786582  | -0.038996 | -0.719437 | -4.792806  |
| C | 0.005923  | 0.725542  | -4.771823  | 0.016835  | 0.721505  | -4.786582  | 0.038996  | 0.719437  | -4.792806  |
| C | 0.003783  | 1.454812  | -3.572644  | 0.024302  | 1.442641  | -3.578704  | 0.06234   | 1.438018  | -3.581981  |
| C | -0.009335 | -2.863815 | -3.643891  | -0.052861 | -2.855326 | -3.651009  | -0.132084 | -2.850545 | -3.654868  |
| C | -0.016218 | -3.475632 | -4.900689  | -0.071922 | -3.470948 | -4.903176  | -0.176241 | -3.46622  | -4.905794  |
| C | -0.021849 | -2.679901 | -6.062505  | -0.065394 | -2.680127 | -6.072478  | -0.152421 | -2.677118 | -6.077019  |
| C | 0.009335  | 2.863815  | -3.643891  | 0.052861  | 2.855326  | -3.651009  | 0.132084  | 2.850545  | -3.654868  |
| C | 0.016218  | 3.475632  | -4.900689  | 0.071922  | 3.470948  | -4.903176  | 0.176241  | 3.46622   | -4.905794  |
| C | 0.021849  | 2.679901  | -6.062505  | 0.065394  | 2.680127  | -6.072478  | 0.152421  | 2.677118  | -6.077019  |
| C | -4.096187 | 2.49331   | -9.894474  | -4.061803 | 2.572162  | -9.880079  | -3.955008 | 2.737865  | -9.880733  |
| C | 4.096187  | -2.49331  | -9.894474  | 4.061803  | -2.572162 | -9.880079  | 3.955008  | -2.737865 | -9.880733  |
| C | -3.094589 | 3.086916  | -10.622657 | -3.053415 | 3.151109  | -10.610747 | -2.924665 | 3.274077  | -10.613417 |
| C | 3.094589  | -3.086916 | -10.622657 | 3.053415  | -3.151109 | -10.610747 | 2.924665  | -3.274077 | -10.613417 |
| H | -0.01109  | 3.451541  | 2.766076   | -0.065997 | 3.427907  | 2.775904   | -0.151192 | 3.427823  | 2.772976   |
| H | -0.024232 | 4.544718  | 5.046224   | -0.090859 | 4.547263  | 5.039247   | -0.222583 | 4.537624  | 5.039122   |
| H | -0.043594 | 3.111104  | 7.088975   | -0.078616 | 3.134253  | 7.100092   | -0.180924 | 3.123492  | 7.098389   |
| H | 0.043594  | -3.111104 | 7.088975   | 0.078616  | -3.134253 | 7.100092   | 0.180924  | -3.123492 | 7.098389   |
| H | 0.024232  | -4.544718 | 5.046224   | 0.090859  | -4.547263 | 5.039247   | 0.222583  | -4.537624 | 5.039122   |
| H | 0.01109   | -3.451541 | 2.766076   | 0.065997  | -3.427907 | 2.775904   | 0.151192  | -3.427823 | 2.772976   |
| H | 5.013276  | -0.486082 | 6.367209   | 4.978316  | -0.136865 | 6.190108   | 4.979015  | 0.112125  | 6.194774   |
| H | 2.57551   | -0.999216 | 6.223016   | 2.563519  | -0.763204 | 6.079323   | 2.603534  | -0.64802  | 6.101425   |



|   |           |           |            |           |           |            |           |           |            |
|---|-----------|-----------|------------|-----------|-----------|------------|-----------|-----------|------------|
| H | 4.117387  | 2.336387  | 9.513261   | 4.037026  | 2.478669  | 9.498803   | 3.908605  | 2.704082  | 9.483423   |
| H | -1.941983 | 1.517036  | 9.491394   | -1.980766 | 1.347191  | 9.587076   | -2.038537 | 1.232114  | 9.602884   |
| H | -1.726302 | 3.183244  | 11.337375  | -1.808452 | 2.971849  | 11.476593  | -1.950665 | 2.861052  | 11.493622  |
| H | 2.551507  | 3.129431  | 10.732985  | 2.451113  | 3.168435  | 10.775746  | 2.289201  | 3.299972  | 10.777907  |
| H | -5.013276 | 0.486082  | 6.367209   | -4.978316 | 0.136865  | 6.190108   | -4.979015 | -0.112125 | 6.194774   |
| H | -2.57551  | 0.999216  | 6.223016   | -2.563519 | 0.763204  | 6.079323   | -2.603534 | 0.64802   | 6.101425   |
| H | -4.117387 | -2.336387 | 9.513261   | -4.037026 | -2.478669 | 9.498803   | -3.908605 | -2.704082 | 9.483423   |
| H | 1.941983  | -1.517036 | 9.491394   | 1.980766  | -1.347191 | 9.587076   | 2.038537  | -1.232114 | 9.602884   |
| H | 1.726302  | -3.183244 | 11.337375  | 1.808452  | -2.971849 | 11.476593  | 1.950665  | -2.861052 | 11.493622  |
| H | -2.551507 | -3.129431 | 10.732985  | -2.451113 | -3.168435 | 10.775746  | -2.289201 | -3.299972 | 10.777907  |
| H | -5.107289 | -0.583023 | -6.510655  | -5.109631 | -0.497496 | -6.501035  | -5.123405 | -0.281911 | -6.496232  |
| H | -2.674883 | -1.078709 | -6.221011  | -2.683537 | -1.03865  | -6.227626  | -2.721426 | -0.925798 | -6.228791  |
| H | 1.911922  | 1.67612   | -9.517768  | 1.932585  | 1.64889   | -9.533831  | 1.996618  | 1.569612  | -9.539943  |
| H | 1.52835   | 3.367743  | -11.318251 | 1.570876  | 3.355933  | -11.324789 | 1.703685  | 3.289226  | -11.331244 |
| H | 5.107289  | 0.583023  | -6.510655  | 5.109631  | 0.497496  | -6.501035  | 5.123405  | 0.281911  | -6.496232  |
| H | 2.674883  | 1.078709  | -6.221011  | 2.683537  | 1.03865   | -6.227626  | 2.721426  | 0.925798  | -6.228791  |
| H | -1.911922 | -1.67612  | -9.517768  | -1.932585 | -1.64889  | -9.533831  | -1.996618 | -1.569612 | -9.539943  |
| H | -1.52835  | -3.367743 | -11.318251 | -1.570876 | -3.355933 | -11.324789 | -1.703685 | -3.289226 | -11.331244 |
| H | -0.008529 | -3.444101 | -2.727614  | -0.06039  | -3.43101  | -2.73183   | -0.151662 | -3.424546 | -2.734788  |
| H | -0.019465 | -4.554513 | -4.998664  | -0.093645 | -4.550307 | -4.997065  | -0.230631 | -4.544657 | -4.998492  |
| H | -0.035026 | -3.124899 | -7.051255  | -0.086649 | -3.131071 | -7.058615  | -0.192413 | -3.128748 | -7.062345  |
| H | 0.008529  | 3.444101  | -2.727614  | 0.06039   | 3.43101   | -2.73183   | 0.151662  | 3.424546  | -2.734788  |
| H | 0.019465  | 4.554513  | -4.998664  | 0.093645  | 4.550307  | -4.997065  | 0.230631  | 4.544657  | -4.998492  |
| H | 0.035026  | 3.124899  | -7.051255  | 0.086649  | 3.131071  | -7.058615  | 0.192413  | 3.128748  | -7.062345  |
| H | -5.831263 | 1.092843  | -8.235685  | -5.813049 | 1.197299  | -8.216085  | -5.75891  | 1.43979   | -8.210852  |
| H | 5.802897  | 1.217313  | 8.054391   | 5.72723   | 1.509767  | 7.945188   | 5.642711  | 1.817325  | 7.928843   |
| H | 5.831263  | -1.092843 | -8.235685  | 5.813049  | -1.197299 | -8.216085  | 5.75891   | -1.43979  | -8.210852  |
| H | -5.802897 | -1.217313 | 8.054391   | -5.72723  | -1.509767 | 7.945188   | -5.642711 | -1.817325 | 7.928843   |
| H | -0.817831 | 4.072665  | -11.873523 | -0.765151 | 4.103827  | -11.86693  | -0.60028  | 4.131409  | -11.872539 |
| H | 0.572696  | 4.011465  | 11.969805  | 0.45617   | 3.902082  | 12.076213  | 0.260501  | 3.916733  | 12.086603  |
| H | 0.817831  | -4.072665 | -11.873523 | 0.765151  | -4.103827 | -11.86693  | 0.60028   | -4.131409 | -11.872539 |
| H | -0.572696 | -4.011465 | 11.969805  | -0.45617  | -3.902082 | 12.076213  | -0.260501 | -3.916733 | 12.086603  |
| H | -5.137252 | 2.746851  | -10.0743   | -5.099074 | 2.844904  | -10.053784 | -4.980301 | 3.05327   | -10.053148 |
| H | -3.326924 | 3.819079  | -11.390931 | -3.276579 | 3.890542  | -11.374818 | -3.118185 | 4.021768  | -11.377568 |
| H | 3.326924  | -3.819079 | -11.390931 | 3.276579  | -3.890542 | -11.374818 | 3.118185  | -4.021768 | -11.377568 |
| H | 5.137252  | -2.746851 | -10.0743   | 5.099074  | -2.844904 | -10.053784 | 4.980301  | -3.05327  | -10.053148 |

| <b>RuOs3</b> |           |           | S0        |           |           | S1        |           |           | T1        |  |  |
|--------------|-----------|-----------|-----------|-----------|-----------|-----------|-----------|-----------|-----------|--|--|
| Atom         | X         | Y         | Z         | X         | Y         | Z         | X         | Y         | Z         |  |  |
| Os           | 0         | 0         | 9.656221  | 0         | 0         | 9.659865  | 0         | 0         | 9.668614  |  |  |
| Ru           | 0         | 0         | -5.559693 | 0         | 0         | -5.57118  | 0         | 0         | -5.576285 |  |  |
| N            | 0.583459  | -1.291584 | 3.219292  | 0.524285  | -1.326371 | 3.221649  | 0.51165   | -1.33288  | 3.216962  |  |  |
| N            | -0.583459 | 1.291584  | 3.219292  | -0.524285 | 1.326371  | 3.221649  | -0.51165  | 1.33288   | 3.216962  |  |  |
| N            | 0.572912  | -1.183648 | 8.065296  | 0.484754  | -1.244152 | 8.087653  | 0.466656  | -1.244677 | 8.077088  |  |  |
| N            | -0.572912 | 1.183648  | 8.065296  | -0.484754 | 1.244152  | 8.087653  | -0.466656 | 1.244677  | 8.077088  |  |  |
| N            | -1.691771 | -1.173442 | 9.763685  | -1.751331 | -1.088701 | 9.706658  | -1.752048 | -1.097392 | 9.716546  |  |  |
| N            | 0.512502  | -1.331406 | 11.140273 | 0.392673  | -1.334709 | 11.186949 | 0.391298  | -1.336049 | 11.193797 |  |  |
| N            | 1.691771  | 1.173442  | 9.763685  | 1.751331  | 1.088701  | 9.706658  | 1.752048  | 1.097392  | 9.716546  |  |  |
| N            | -0.512502 | 1.331406  | 11.140273 | -0.392673 | 1.334709  | 11.186949 | -0.391298 | 1.336049  | 11.193797 |  |  |
| N            | 1.976051  | 0.615103  | -5.667155 | 1.977332  | 0.607874  | -5.672746 | 1.977569  | 0.606011  | -5.676481 |  |  |
| N            | 0.698267  | -1.247257 | -7.056733 | 0.698727  | -1.251122 | -7.064959 | 0.698819  | -1.25216  | -7.069233 |  |  |
| N            | -1.976051 | -0.615103 | -5.667155 | -1.977332 | -0.607874 | -5.672746 | -1.977569 | -0.606011 | -5.676481 |  |  |
| N            | -0.698267 | 1.247257  | -7.056733 | -0.698727 | 1.251122  | -7.064959 | -0.698819 | 1.25216   | -7.069233 |  |  |
| N            | 0.582888  | -1.291925 | 0.873545  | 0.545338  | -1.308311 | 0.87879   | 0.539939  | -1.31696  | 0.876198  |  |  |
| N            | -0.582888 | 1.291925  | 0.873545  | -0.545338 | 1.308311  | 0.87879   | -0.539939 | 1.31696   | 0.876198  |  |  |
| N            | -0.536201 | 1.218103  | -3.966347 | -0.528279 | 1.225956  | -3.980188 | -0.52612  | 1.227831  | -3.985899 |  |  |
| N            | 0.536201  | -1.218103 | -3.966347 | 0.528279  | -1.225956 | -3.980188 | 0.52612   | -1.227831 | -3.985899 |  |  |
| C            | -0.300088 | 0.663592  | 4.362519  | -0.261161 | 0.676539  | 4.373933  | -0.2503   | 0.66884   | 4.376485  |  |  |
| C            | 0.300088  | -0.663592 | 4.362519  | 0.261161  | -0.676539 | 4.373933  | 0.2503    | -0.66884  | 4.376485  |  |  |
| C            | 0.605809  | -1.325393 | 5.633038  | 0.511144  | -1.345783 | 5.638976  | 0.496512  | -1.348545 | 5.637789  |  |  |
| C            | 0.306133  | -0.654503 | 6.828194  | 0.257475  | -0.659859 | 6.853167  | 0.251063  | -0.670347 | 6.845728  |  |  |
| C            | -0.306133 | 0.654503  | 6.828194  | -0.257475 | 0.659859  | 6.853167  | -0.251063 | 0.670347  | 6.845728  |  |  |
| C            | -0.605809 | 1.325393  | 5.633038  | -0.511144 | 1.345783  | 5.638976  | -0.496512 | 1.348545  | 5.637789  |  |  |
| C            | 1.194431  | -2.603518 | 5.709638  | 0.999391  | -2.666654 | 5.725683  | 0.977898  | -2.678521 | 5.723664  |  |  |
| C            | 1.454722  | -3.146646 | 6.973048  | 1.205865  | -3.252892 | 6.980181  | 1.177614  | -3.258058 | 6.977145  |  |  |
| C            | 1.135546  | -2.416381 | 8.13102   | 0.931971  | -2.513317 | 8.148392  | 0.908064  | -2.517493 | 8.147355  |  |  |
| C            | -1.135546 | 2.416381  | 8.13102   | -0.931971 | 2.513317  | 8.148392  | -0.908064 | 2.517493  | 8.147355  |  |  |
| C            | -1.454722 | 3.146646  | 6.973048  | -1.205865 | 3.252892  | 6.980181  | -1.177614 | 3.258058  | 6.977145  |  |  |
| C            | -1.194431 | 2.603518  | 5.709638  | -0.999391 | 2.666654  | 5.725683  | -0.977898 | 2.678521  | 5.723664  |  |  |
| C            | -3.882319 | -2.903986 | 10.002567 | -4.011208 | -2.715356 | 9.85231   | -3.999645 | -2.741699 | 9.846568  |  |  |
| C            | -3.896813 | -1.854653 | 9.065791  | -3.934334 | -1.687073 | 8.897937  | -3.933499 | -1.698741 | 8.906841  |  |  |
| C            | -2.786792 | -1.011402 | 8.972297  | -2.784747 | -0.89412  | 8.846551  | -2.790475 | -0.896673 | 8.863113  |  |  |
| C            | -1.668663 | -2.195599 | 10.680191 | -1.810806 | -2.096019 | 10.63722  | -1.802201 | -2.115913 | 10.634833 |  |  |
| C            | -2.754016 | -3.072667 | 10.816187 | -2.934905 | -2.923678 | 10.72799  | -2.920162 | -2.953152 | 10.717053 |  |  |
| C            | -0.431817 | -2.270959 | 11.473805 | -0.608797 | -2.225392 | 11.479074 | -0.601931 | -2.239771 | 11.477373 |  |  |
| C            | 1.696353  | -1.307804 | 11.811002 | 1.537868  | -1.334036 | 11.916393 | 1.535503  | -1.326685 | 11.927358 |  |  |
| C            | 1.984848  | -2.217694 | 12.831216 | 1.739637  | -2.245401 | 12.956916 | 1.743973  | -2.242338 | 12.961679 |  |  |
| C            | -0.196446 | -3.207089 | 12.490526 | -0.462823 | -3.155593 | 12.514059 | -0.447616 | -3.174495 | 12.506721 |  |  |
| C            | 1.023746  | -3.184186 | 13.17905  | 0.725829  | -3.170317 | 13.258625 | 0.739443  | -3.181011 | 13.254001 |  |  |
| C            | 3.882319  | 2.903986  | 10.002567 | 4.011208  | 2.715356  | 9.85231   | 3.999645  | 2.741699  | 9.846568  |  |  |
| C            | 3.896813  | 1.854653  | 9.065791  | 3.934334  | 1.687073  | 8.897937  | 3.933499  | 1.698741  | 8.906841  |  |  |
| C            | 2.786792  | 1.011402  | 8.972297  | 2.784747  | 0.89412   | 8.846551  | 2.790475  | 0.896673  | 8.863113  |  |  |
| C            | 1.668663  | 2.195599  | 10.680191 | 1.810806  | 2.096019  | 10.63722  | 1.802201  | 2.115913  | 10.634833 |  |  |
| C            | 2.754016  | 3.072667  | 10.816187 | 2.934905  | 2.923678  | 10.72799  | 2.920162  | 2.953152  | 10.717053 |  |  |
| C            | 0.431817  | 2.270959  | 11.473805 | 0.608797  | 2.225392  | 11.479074 | 0.601931  | 2.239771  | 11.477373 |  |  |
| C            | -1.696353 | 1.307804  | 11.811002 | -1.537868 | 1.334036  | 11.916393 | -1.535503 | 1.326685  | 11.927358 |  |  |

|   |           |           |            |           |           |            |           |           |            |
|---|-----------|-----------|------------|-----------|-----------|------------|-----------|-----------|------------|
| C | -1.984848 | 2.217694  | 12.831216  | -1.739637 | 2.245401  | 12.956916  | -1.743973 | 2.242338  | 12.961679  |
| C | 0.196446  | 3.207089  | 12.490526  | 0.462823  | 3.155593  | 12.514059  | 0.447616  | 3.174495  | 12.506721  |
| C | -1.023746 | 3.184186  | 13.17905   | -0.725829 | 3.170317  | 13.258625  | -0.739443 | 3.181011  | 13.254001  |
| C | 4.740482  | 1.166738  | -5.995998  | 4.74639   | 1.145625  | -5.986821  | 4.747713  | 1.140466  | -5.986919  |
| C | 3.94811   | 1.855392  | -5.071145  | 3.951987  | 1.83975   | -5.067794  | 3.95278   | 1.835909  | -5.069329  |
| C | 2.577804  | 1.560568  | -4.926315  | 2.579406  | 1.55176   | -4.930027  | 2.579665  | 1.549543  | -4.933288  |
| C | 2.721077  | -0.060422 | -6.606549  | 2.724766  | -0.073328 | -6.606058  | 2.725621  | -0.076576 | -6.608273  |
| C | 4.098198  | 0.182946  | -6.818512  | 4.104307  | 0.162945  | -6.8106    | 4.105731  | 0.158004  | -6.810985  |
| C | 2.018846  | -1.042904 | -7.385235  | 2.022193  | -1.0544   | -7.386375  | 2.022989  | -1.057341 | -7.388932  |
| C | 0         | -2.171149 | -7.737977  | 0         | -2.173188 | -7.748261  | 0         | -2.173843 | -7.752993  |
| C | 0.577844  | -2.908943 | -8.790607  | 0.580148  | -2.916289 | -8.795953  | 0.58072   | -2.918312 | -8.799409  |
| C | 2.673164  | -1.748547 | -8.421524  | 2.679042  | -1.76569  | -8.417324  | 2.680462  | -1.770071 | -8.418522  |
| C | 1.908116  | -2.702012 | -9.171458  | 1.913723  | -2.717019 | -9.169458  | 1.915096  | -2.720941 | -9.171129  |
| C | -4.740482 | -1.166738 | -5.995998  | -4.74639  | -1.145625 | -5.986821  | -4.747713 | -1.140466 | -5.986919  |
| C | -3.94811  | -1.855392 | -5.071145  | -3.951987 | -1.83975  | -5.067794  | -3.95278  | -1.835909 | -5.069329  |
| C | -2.577804 | -1.560568 | -4.926315  | -2.579406 | -1.55176  | -4.930027  | -2.579665 | -1.549543 | -4.933288  |
| C | -2.721077 | 0.060422  | -6.606549  | -2.724766 | 0.073328  | -6.606058  | -2.725621 | 0.076576  | -6.608273  |
| C | -4.098198 | -0.182946 | -6.818512  | -4.104307 | -0.162945 | -6.8106    | -4.105731 | -0.158004 | -6.810985  |
| C | -2.018846 | 1.042904  | -7.385235  | -2.022193 | 1.0544    | -7.386375  | -2.022989 | 1.057341  | -7.388932  |
| C | 0         | 2.171149  | -7.737977  | 0         | 2.173188  | -7.748261  | 0         | 2.173843  | -7.752993  |
| C | -0.577844 | 2.908943  | -8.790607  | -0.580148 | 2.916289  | -8.795953  | -0.58072  | 2.918312  | -8.799409  |
| C | -2.673164 | 1.748547  | -8.421524  | -2.679042 | 1.76569   | -8.417324  | -2.680462 | 1.770071  | -8.418522  |
| C | -1.908116 | 2.702012  | -9.171458  | -1.913723 | 2.717019  | -9.169458  | -1.915096 | 2.720941  | -9.171129  |
| C | 0.29613   | -0.656083 | 2.046382   | 0.2743    | -0.675309 | 2.043184   | 0.270556  | -0.681818 | 2.044966   |
| C | -0.29613  | 0.656083  | 2.046382   | -0.2743   | 0.675309  | 2.043184   | -0.270556 | 0.681818  | 2.044966   |
| C | -0.299423 | 0.663468  | -0.269488  | -0.27947  | 0.656968  | -0.283304  | -0.276015 | 0.657145  | -0.287164  |
| C | 0.299423  | -0.663468 | -0.269488  | 0.27947   | -0.656968 | -0.283304  | 0.276015  | -0.657145 | -0.287164  |
| C | -0.596946 | 1.32678   | -1.540641  | -0.572632 | 1.32452   | -1.54595   | -0.566712 | 1.323367  | -1.548992  |
| C | -0.29574  | 0.662694  | -2.740068  | -0.286993 | 0.662289  | -2.753885  | -0.284711 | 0.661935  | -2.759789  |
| C | 0.29574   | -0.662694 | -2.740068  | 0.286993  | -0.662289 | -2.753885  | 0.284711  | -0.661935 | -2.759789  |
| C | 0.596946  | -1.32678  | -1.540641  | 0.572632  | -1.32452  | -1.54595   | 0.566712  | -1.323367 | -1.548992  |
| C | -1.175001 | 2.61176   | -1.611765  | -1.13593  | 2.620337  | -1.618379  | -1.126348 | 2.622165  | -1.622381  |
| C | -1.425829 | 3.169955  | -2.86858   | -1.386267 | 3.183092  | -2.870647  | -1.376353 | 3.186234  | -2.873569  |
| C | -1.095525 | 2.446469  | -4.030613  | -1.071275 | 2.457898  | -4.040016  | -1.065094 | 2.460811  | -4.044766  |
| C | 1.175001  | -2.61176  | -1.611765  | 1.13593   | -2.620337 | -1.618379  | 1.126348  | -2.622165 | -1.622381  |
| C | 1.425829  | -3.169955 | -2.86858   | 1.386267  | -3.183092 | -2.870647  | 1.376353  | -3.186234 | -2.873569  |
| C | 1.095525  | -2.446469 | -4.030613  | 1.071275  | -2.457898 | -4.040016  | 1.065094  | -2.460811 | -4.044766  |
| C | 4.753647  | -0.557389 | -7.871555  | 4.762238  | -0.58335  | -7.85801   | 4.764282  | -0.589792 | -7.856972  |
| C | -4.753647 | 0.557389  | -7.871555  | -4.762238 | 0.58335   | -7.85801   | -4.764282 | 0.589792  | -7.856972  |
| C | 4.076299  | -1.477595 | -8.632721  | 4.084811  | -1.502064 | -8.620911  | 4.086863  | -1.508211 | -8.620242  |
| C | -4.076299 | 1.477595  | -8.632721  | -4.084811 | 1.502064  | -8.620911  | -4.086863 | 1.508211  | -8.620242  |
| C | 2.461837  | -3.456613 | -10.326427 | 2.47047   | -3.47707  | -10.319529 | 2.472576  | -3.482407 | -10.319941 |
| C | 3.144889  | -2.795321 | -11.370321 | 3.162476  | -2.82154  | -11.361166 | 3.166803  | -2.828381 | -11.36105  |
| C | 2.246307  | -4.848346 | -10.418488 | 2.249268  | -4.868042 | -10.409559 | 2.249956  | -4.873192 | -10.409398 |
| C | 3.613137  | -3.516257 | -12.480268 | 3.633912  | -3.547283 | -12.466651 | 3.639018  | -3.555384 | -12.465381 |
| C | 2.72305   | -5.570686 | -11.524142 | 2.728958  | -5.595253 | -11.510777 | 2.730365  | -5.601678 | -11.509469 |
| C | 3.408793  | -4.90656  | -12.558018 | 3.423701  | -4.936834 | -12.54229  | 3.427341  | -4.944746 | -12.540423 |
| C | 6.192725  | 1.473449  | -6.080749  | 6.200489  | 1.44595   | -6.064414  | 6.202245  | 1.439277  | -6.062749  |
| C | 7.161261  | 0.44666   | -6.048446  | 7.164605  | 0.415327  | -6.023439  | 7.165305  | 0.407755  | -6.019671  |

|   |           |           |            |           |           |            |           |           |            |
|---|-----------|-----------|------------|-----------|-----------|------------|-----------|-----------|------------|
| C | 6.617531  | 2.818571  | -6.128721  | 6.631331  | 2.789075  | -6.114438  | 6.63453   | 2.781922  | -6.113271  |
| C | 8.529413  | 0.76101   | -6.07441   | 8.534222  | 0.72384   | -6.043044  | 8.535262  | 0.71488   | -6.03773   |
| C | 7.985654  | 3.132272  | -6.164137  | 8.000953  | 3.096996  | -6.143311  | 8.0045    | 3.088472  | -6.14055   |
| C | 8.945767  | 2.103862  | -6.137787  | 8.956621  | 2.064711  | -6.108463  | 8.959104  | 2.055274  | -6.103637  |
| C | -2.461837 | 3.456613  | -10.326427 | -2.47047  | 3.47707   | -10.319529 | -2.472576 | 3.482407  | -10.319941 |
| C | -3.144889 | 2.795321  | -11.370321 | -3.162476 | 2.82154   | -11.361166 | -3.166803 | 2.828381  | -11.36105  |
| C | -2.246307 | 4.848346  | -10.418488 | -2.249268 | 4.868042  | -10.409559 | -2.249956 | 4.873192  | -10.409398 |
| C | -3.613137 | 3.516257  | -12.480268 | -3.633912 | 3.547283  | -12.466651 | -3.639018 | 3.555384  | -12.465381 |
| C | -2.72305  | 5.570686  | -11.524142 | -2.728958 | 5.595253  | -11.510777 | -2.730365 | 5.601678  | -11.509469 |
| C | -3.408793 | 4.90656   | -12.558018 | -3.423701 | 4.936834  | -12.54229  | -3.427341 | 4.944746  | -12.540423 |
| C | -6.192725 | -1.473449 | -6.080749  | -6.200489 | -1.44595  | -6.064414  | -6.202245 | -1.439277 | -6.062749  |
| C | -7.161261 | -0.44666  | -6.048446  | -7.164605 | -0.415327 | -6.023439  | -7.165305 | -0.407755 | -6.019671  |
| C | -6.617531 | -2.818571 | -6.128721  | -6.631331 | -2.789075 | -6.114438  | -6.63453  | -2.781922 | -6.113271  |
| C | -8.529413 | -0.76101  | -6.07441   | -8.534222 | -0.72384  | -6.043044  | -8.535262 | -0.71488  | -6.03773   |
| C | -7.985654 | -3.132272 | -6.164137  | -8.000953 | -3.096996 | -6.143311  | -8.0045   | -3.088472 | -6.14055   |
| C | -8.945767 | -2.103862 | -6.137787  | -8.956621 | -2.064711 | -6.108463  | -8.959104 | -2.055274 | -6.103637  |
| H | 1.434389  | -3.139145 | 4.797798   | 1.203325  | -3.210799 | 4.809179   | 1.17854   | -3.222929 | 4.80722    |
| H | 1.904775  | -4.126582 | 7.077641   | 1.575173  | -4.266597 | 7.072709   | 1.54001   | -4.274226 | 7.073263   |
| H | 1.33735   | -2.810708 | 9.120495   | 1.089325  | -2.939775 | 9.133413   | 1.06297   | -2.942724 | 9.132696   |
| H | -1.33735  | 2.810708  | 9.120495   | -1.089325 | 2.939775  | 9.133413   | -1.06297  | 2.942724  | 9.132696   |
| H | -1.904775 | 4.126582  | 7.077641   | -1.575173 | 4.266597  | 7.072709   | -1.54001  | 4.274226  | 7.073263   |
| H | -1.434389 | 3.139145  | 4.797798   | -1.203325 | 3.210799  | 4.809179   | -1.17854  | 3.222929  | 4.80722    |
| H | -4.749386 | -1.688023 | 8.417781   | -4.743473 | -1.499819 | 8.202719   | -4.746142 | -1.507318 | 8.216864   |
| H | -2.761244 | -0.186885 | 8.269255   | -2.684491 | -0.090061 | 8.12744    | -2.700261 | -0.081078 | 8.155425   |
| H | -2.720928 | -3.875797 | 11.543334  | -2.974571 | -3.720119 | 11.461317  | -2.9522   | -3.758387 | 11.441146  |
| H | 2.41131   | -0.55141  | 11.509058  | 2.293679  | -0.604972 | 11.647961  | 2.283566  | -0.586647 | 11.66727   |
| H | 2.941466  | -2.165204 | 13.337923  | 2.668556  | -2.224273 | 13.513524  | 2.67061   | -2.214096 | 13.52171   |
| H | -0.952148 | -3.941778 | 12.743458  | -1.258275 | -3.855026 | 12.740915  | -1.236092 | -3.883905 | 12.726931  |
| H | 4.749386  | 1.688023  | 8.417781   | 4.743473  | 1.499819  | 8.202719   | 4.746142  | 1.507318  | 8.216864   |
| H | 2.761244  | 0.186885  | 8.269255   | 2.684491  | 0.090061  | 8.12744    | 2.700261  | 0.081078  | 8.155425   |
| H | 2.720928  | 3.875797  | 11.543334  | 2.974571  | 3.720119  | 11.461317  | 2.9522    | 3.758387  | 11.441146  |
| H | -2.41131  | 0.55141   | 11.509058  | -2.293679 | 0.604972  | 11.647961  | -2.283566 | 0.586647  | 11.66727   |
| H | -2.941466 | 2.165204  | 13.337923  | -2.668556 | 2.224273  | 13.513524  | -2.67061  | 2.214096  | 13.52171   |
| H | 0.952148  | 3.941778  | 12.743458  | 1.258275  | 3.855026  | 12.740915  | 1.236092  | 3.883905  | 12.726931  |
| H | 4.391115  | 2.606655  | -4.425723  | 4.395022  | 2.590225  | -4.421397  | 4.395794  | 2.586211  | -4.422698  |
| H | 1.968026  | 2.085708  | -4.199339  | 1.967483  | 2.080652  | -4.207491  | 1.967131  | 2.07926   | -4.211852  |
| H | -1.035798 | -2.320982 | -7.453214  | -1.038216 | -2.316849 | -7.468854  | -1.0388   | -2.315994 | -7.474907  |
| H | -0.03986  | -3.619101 | -9.330467  | -0.037875 | -3.624696 | -9.337827  | -0.037374 | -3.626334 | -9.341728  |
| H | -4.391115 | -2.606655 | -4.425723  | -4.395022 | -2.590225 | -4.421397  | -4.395794 | -2.586211 | -4.422698  |
| H | -1.968026 | -2.085708 | -4.199339  | -1.967483 | -2.080652 | -4.207491  | -1.967131 | -2.07926  | -4.211852  |
| H | 1.035798  | 2.320982  | -7.453214  | 1.038216  | 2.316849  | -7.468854  | 1.0388    | 2.315994  | -7.474907  |
| H | 0.03986   | 3.619101  | -9.330467  | 0.037875  | 3.624696  | -9.337827  | 0.037374  | 3.626334  | -9.341728  |
| H | -1.413646 | 3.140605  | -0.695426  | -1.362577 | 3.149492  | -0.699153  | -1.350042 | 3.151279  | -0.702405  |
| H | -1.870083 | 4.153202  | -2.966159  | -1.818771 | 4.172293  | -2.964295  | -1.80587  | 4.176968  | -2.966168  |
| H | -1.271924 | 2.85487   | -5.019494  | -1.24875  | 2.872092  | -5.026533  | -1.242652 | 2.876424  | -5.030761  |
| H | 1.413646  | -3.140605 | -0.695426  | 1.362577  | -3.149492 | -0.699153  | 1.350042  | -3.151279 | -0.702405  |
| H | 1.870083  | -4.153202 | -2.966159  | 1.818771  | -4.172293 | -2.964295  | 1.80587   | -4.176968 | -2.966168  |
| H | 1.271924  | -2.85487  | -5.019494  | 1.24875   | -2.872092 | -5.026533  | 1.242652  | -2.876424 | -5.030761  |
| H | -4.730152 | -3.573736 | 10.096194  | -4.890342 | -3.347314 | 9.910728   | -4.873747 | -3.381189 | 9.898088   |

|   |            |           |            |            |           |            |           |           |            |
|---|------------|-----------|------------|------------|-----------|------------|-----------|-----------|------------|
| H | 4.730152   | 3.573736  | 10.096194  | 4.890342   | 3.347314  | 9.910728   | 4.873747  | 3.381189  | 9.898088   |
| H | 1.220975   | -3.902021 | 13.967689  | 0.855757   | -3.887184 | 14.061653  | 0.875233  | -3.901748 | 14.052601  |
| H | -1.220975  | 3.902021  | 13.967689  | -0.855757  | 3.887184  | 14.061653  | -0.875233 | 3.901748  | 14.052601  |
| H | 5.802495   | -0.365858 | -8.07117   | 5.813243   | -0.397621 | -8.051873  | 5.815801  | -0.40547  | -8.049433  |
| H | 4.605491   | -2.028845 | -9.402591  | 4.61579    | -2.057771 | -9.386375  | 4.618295  | -2.06505  | -9.384578  |
| H | -4.605491  | 2.028845  | -9.402591  | -4.61579   | 2.057771  | -9.386375  | -4.618295 | 2.06505   | -9.384578  |
| H | -5.802495  | 0.365858  | -8.07117   | -5.813243  | 0.397621  | -8.051873  | -5.815801 | 0.40547   | -8.049433  |
| H | 3.28071    | -1.716722 | -11.331735 | 3.303028   | -1.74347  | -11.32431  | 3.308528  | -1.750444 | -11.324688 |
| H | 1.723406   | -5.365584 | -9.616674  | 1.71942    | -5.380918 | -9.609495  | 1.718393  | -5.384935 | -9.609745  |
| H | 4.128938   | -2.995682 | -13.282095 | 4.156739   | -3.030984 | -13.26671  | 4.163586  | -3.040198 | -13.265023 |
| H | 2.561515   | -6.643497 | -11.578768 | 2.562811   | -6.667457 | -11.563737 | 2.563065  | -6.67373  | -11.561958 |
| H | 3.775226   | -5.464215 | -13.415434 | 3.792534   | -5.49824  | -13.396232 | 3.796761  | -5.507135 | -13.393468 |
| H | 6.848553   | -0.592217 | -5.969276  | 6.847028   | -0.621959 | -5.942623  | 6.846566  | -0.629148 | -5.938463  |
| H | 5.87715    | 3.615372  | -6.157706  | 5.894383   | 3.588807  | -6.149883  | 5.898407  | 3.582345  | -6.150294  |
| H | 9.265947   | -0.036669 | -6.039621  | 9.267195   | -0.076821 | -6.001669  | 9.26738   | -0.086484 | -5.994761  |
| H | 8.300573   | 4.170776  | -6.212659  | 8.320458   | 4.134044  | -6.193348  | 8.325095  | 4.12517   | -6.190956  |
| H | 10.004722  | 2.345602  | -6.162067  | 10.016705  | 2.301954  | -6.127751  | 10.01945  | 2.291447  | -6.121713  |
| H | -3.28071   | 1.716722  | -11.331735 | -3.303028  | 1.74347   | -11.32431  | -3.308528 | 1.750444  | -11.324688 |
| H | -1.723406  | 5.365584  | -9.616674  | -1.71942   | 5.380918  | -9.609495  | -1.718393 | 5.384935  | -9.609745  |
| H | -4.128938  | 2.995682  | -13.282095 | -4.156739  | 3.030984  | -13.26671  | -4.163586 | 3.040198  | -13.265023 |
| H | -2.561515  | 6.643497  | -11.578768 | -2.562811  | 6.667457  | -11.563737 | -2.563065 | 6.67373   | -11.561958 |
| H | -3.775226  | 5.464215  | -13.415434 | -3.792534  | 5.49824   | -13.396232 | -3.796761 | 5.507135  | -13.393468 |
| H | -6.848553  | 0.592217  | -5.969276  | -6.847028  | 0.621959  | -5.942623  | -6.846566 | 0.629148  | -5.938463  |
| H | -5.87715   | -3.615372 | -6.157706  | -5.894383  | -3.588807 | -6.149883  | -5.898407 | -3.582345 | -6.150294  |
| H | -9.265947  | 0.036669  | -6.039621  | -9.267195  | 0.076821  | -6.001669  | -9.26738  | 0.086484  | -5.994761  |
| H | -8.300573  | -4.170776 | -6.212659  | -8.320458  | -4.134044 | -6.193348  | -8.325095 | -4.12517  | -6.190956  |
| H | -10.004722 | -2.345602 | -6.162067  | -10.016705 | -2.301954 | -6.127751  | -10.01945 | -2.291447 | -6.121713  |

| <b>RuOs4</b> |           |           |           |           |           |           |           |           |           |
|--------------|-----------|-----------|-----------|-----------|-----------|-----------|-----------|-----------|-----------|
|              | S0        |           |           | S1        |           |           | T1        |           |           |
| Symbol       | X         | Y         | Z         | X         | Y         | Z         | X         | Y         | Z         |
| Os           | 0         | 0         | 8.97489   | 0         | 0         | 8.97917   | 0         | 0         | 8.98698   |
| Ru           | 0         | 0         | -6.242511 | 0         | 0         | -6.254342 | 0         | 0         | -6.257201 |
| N            | 0.014715  | 1.417054  | 2.538237  | 0.018525  | 1.425954  | 2.540492  | 0.005951  | 1.423451  | 2.529276  |
| N            | -0.014715 | -1.417054 | 2.538237  | -0.018525 | -1.425954 | 2.540492  | -0.005951 | -1.423451 | 2.529276  |
| N            | 0.006335  | 1.314479  | 7.384193  | 0.010935  | 1.33527   | 7.406785  | -0.008389 | 1.320674  | 7.397028  |
| N            | -0.006335 | -1.314479 | 7.384193  | -0.010935 | -1.33527  | 7.406785  | 0.008389  | -1.320674 | 7.397028  |
| N            | 2.038508  | 0.289478  | 9.079743  | 2.029965  | 0.360876  | 9.031167  | 2.033578  | 0.311582  | 9.081104  |
| N            | 0.140746  | 1.41576   | 10.463208 | 0.128434  | 1.38223   | 10.510115 | 0.132233  | 1.4187    | 10.470555 |
| N            | -2.038508 | -0.289478 | 9.079743  | -2.029965 | -0.360876 | 9.031167  | -2.033578 | -0.311582 | 9.081104  |
| N            | -0.140746 | -1.41576  | 10.463208 | -0.128434 | -1.38223  | 10.510115 | -0.132233 | -1.4187   | 10.470555 |
| N            | -2.049535 | 0.278077  | -6.35131  | -2.049869 | 0.269059  | -6.357113 | -2.021966 | 0.421045  | -6.321192 |
| N            | -0.132674 | 1.427099  | -7.731389 | -0.143181 | 1.428541  | -7.740858 | -0.069621 | 1.39057   | -7.779203 |
| N            | 2.049535  | -0.278077 | -6.35131  | 2.049869  | -0.269059 | -6.357113 | 2.021966  | -0.421045 | -6.321192 |
| N            | 0.132674  | -1.427099 | -7.731389 | 0.143181  | -1.428541 | -7.740858 | 0.069621  | -1.39057  | -7.779203 |
| N            | 0         | 1.417208  | 0.192567  | 0         | 1.417191  | 0.197568  | 0         | 1.427537  | 0.188452  |
| N            | 0         | -1.417208 | 0.192567  | 0         | -1.417191 | 0.197568  | 0         | -1.427537 | 0.188452  |
| N            | -0.001473 | -1.330379 | -4.64775  | 0.002828  | -1.334542 | -4.661802 | -0.021811 | -1.339697 | -4.667634 |
| N            | 0.001473  | 1.330379  | -4.64775  | -0.002828 | 1.334542  | -4.661802 | 0.021811  | 1.339697  | -4.667634 |
| C            | -0.010978 | -0.72805  | 3.681457  | -0.013525 | -0.725142 | 3.692578  | -0.004272 | -0.713105 | 3.692694  |
| C            | 0.010978  | 0.72805   | 3.681457  | 0.013525  | 0.725142  | 3.692578  | 0.004272  | 0.713105  | 3.692694  |
| C            | 0.024572  | 1.457064  | 4.951937  | 0.030264  | 1.439174  | 4.957821  | 0.007969  | 1.441596  | 4.953855  |
| C            | 0.009719  | 0.722407  | 6.146872  | 0.007144  | 0.70799   | 6.172158  | 0.001496  | 0.71786   | 6.160598  |
| C            | -0.009719 | -0.722407 | 6.146872  | -0.007144 | -0.70799  | 6.172158  | -0.001496 | -0.71786  | 6.160598  |
| C            | -0.024572 | -1.457064 | 4.951937  | -0.030264 | -1.439174 | 4.957821  | -0.007969 | -1.441596 | 4.953855  |
| C            | 0.048311  | 2.864019  | 5.028925  | 0.070202  | 2.846614  | 5.044171  | 0.014346  | 2.854483  | 5.033243  |
| C            | 0.055958  | 3.466046  | 6.29246   | 0.092759  | 3.468114  | 6.298713  | 0.013993  | 3.461955  | 6.290447  |
| C            | 0.034081  | 2.669058  | 7.450308  | 0.067342  | 2.679904  | 7.466736  | 0.002451  | 2.670716  | 7.4581    |
| C            | -0.034081 | -2.669058 | 7.450308  | -0.067342 | -2.679904 | 7.466736  | -0.002451 | -2.670716 | 7.4581    |
| C            | -0.055958 | -3.466046 | 6.29246   | -0.092759 | -3.468114 | 6.298713  | -0.013993 | -3.461955 | 6.290447  |
| C            | -0.048311 | -2.864019 | 5.028925  | -0.070202 | -2.846614 | 5.044171  | -0.014346 | -2.854483 | 5.033243  |
| C            | 4.772927  | 0.852877  | 9.317574  | 4.734963  | 1.014625  | 9.198597  | 4.762081  | 0.91732   | 9.290725  |
| C            | 4.314085  | -0.086955 | 8.376815  | 4.281118  | 0.10612   | 8.227678  | 4.308371  | -0.035369 | 8.360034  |
| C            | 2.943656  | -0.342605 | 8.283927  | 2.917586  | -0.19373  | 8.165166  | 2.941187  | -0.311683 | 8.28061   |
| C            | 2.477484  | 1.209589  | 9.999465  | 2.459606  | 1.259195  | 9.976334  | 2.467549  | 1.244236  | 9.990898  |
| C            | 3.841073  | 1.505977  | 10.135111 | 3.812056  | 1.601381  | 10.077652 | 3.827973  | 1.561926  | 10.112174 |
| C            | 1.407045  | 1.829437  | 10.796507 | 1.390144  | 1.823331  | 10.81801  | 1.394855  | 1.852117  | 10.793495 |
| C            | -0.926047 | 1.919876  | 11.141265 | -0.93849  | 1.811793  | 11.231561 | -0.936719 | 1.908867  | 11.156071 |
| C            | -0.773066 | 2.85651   | 12.166697 | -0.789494 | 2.722206  | 12.281686 | -0.789918 | 2.850206  | 12.177859 |
| C            | 1.61907   | 2.766276  | 11.817777 | 1.598223  | 2.729018  | 11.864403 | 1.600629  | 2.794602  | 11.811246 |
| C            | 0.520082  | 3.288984  | 12.512274 | 0.4969    | 3.187636  | 12.602115 | 0.499493  | 3.302977  | 12.512638 |
| C            | -4.772927 | -0.852877 | 9.317574  | -4.734963 | -1.014625 | 9.198597  | -4.762081 | -0.91732  | 9.290725  |
| C            | -4.314085 | 0.086955  | 8.376815  | -4.281118 | -0.10612  | 8.227678  | -4.308371 | 0.035369  | 8.360034  |
| C            | -2.943656 | 0.342605  | 8.283927  | -2.917586 | 0.19373   | 8.165166  | -2.941187 | 0.311683  | 8.28061   |
| C            | -2.477484 | -1.209589 | 9.999465  | -2.459606 | -1.259195 | 9.976334  | -2.467549 | -1.244236 | 9.990898  |
| C            | -3.841073 | -1.505977 | 10.135111 | -3.812056 | -1.601381 | 10.077652 | -3.827973 | -1.561926 | 10.112174 |
| C            | -1.407045 | -1.829437 | 10.796507 | -1.390144 | -1.823331 | 10.81801  | -1.394855 | -1.852117 | 10.793495 |
| C            | 0.926047  | -1.919876 | 11.141265 | 0.93849   | -1.811793 | 11.231561 | 0.936719  | -1.908867 | 11.156071 |

|   |           |           |            |           |           |            |           |           |            |
|---|-----------|-----------|------------|-----------|-----------|------------|-----------|-----------|------------|
| C | 0.773066  | -2.85651  | 12.166697  | 0.789494  | -2.722206 | 12.281686  | 0.789918  | -2.850206 | 12.177859  |
| C | -1.61907  | -2.766276 | 11.817777  | -1.598223 | -2.729018 | 11.864403  | -1.600629 | -2.794602 | 11.811246  |
| C | -0.520082 | -3.288984 | 12.512274  | -0.4969   | -3.187636 | 12.602115  | -0.499493 | -3.302977 | 12.512638  |
| C | -4.806363 | 0.8339    | -6.632212  | -4.809655 | 0.818823  | -6.621693  | -4.727133 | 1.175849  | -6.514913  |
| C | -4.335548 | -0.102737 | -5.691244  | -4.331275 | -0.118467 | -5.685122  | -4.290609 | 0.244083  | -5.552001  |
| C | -2.963532 | -0.352618 | -5.577895  | -2.957971 | -0.365201 | -5.579618  | -2.939923 | -0.104965 | -5.476436  |
| C | -2.478045 | 1.196094  | -7.273979  | -2.485674 | 1.188577  | -7.274802  | -2.411396 | 1.339326  | -7.262954  |
| C | -3.837373 | 1.483071  | -7.426494  | -3.846674 | 1.47244   | -7.4195    | -3.746824 | 1.723759  | -7.372629  |
| C | -1.399871 | 1.830917  | -8.062272  | -1.412899 | 1.82901   | -8.065937  | -1.314399 | 1.871178  | -8.09584   |
| C | 0.920241  | 1.949595  | -8.402063  | 0.905326  | 1.956586  | -8.414087  | 1.009048  | 1.793345  | -8.491656  |
| C | 0.759613  | 2.896875  | -9.419383  | 0.737758  | 2.905984  | -9.42837   | 0.893802  | 2.712468  | -9.537485  |
| C | -1.614624 | 2.772731  | -9.072152  | -1.634748 | 2.772683  | -9.072804  | -1.480147 | 2.783075  | -9.137138  |
| C | -0.530218 | 3.33404   | -9.779248  | -0.554994 | 3.339561  | -9.7824    | -0.369066 | 3.232484  | -9.885325  |
| C | 4.806363  | -0.8339   | -6.632212  | 4.809655  | -0.818823 | -6.621693  | 4.727133  | -1.175849 | -6.514913  |
| C | 4.335548  | 0.102737  | -5.691244  | 4.331275  | 0.118467  | -5.685122  | 4.290609  | -0.244083 | -5.552001  |
| C | 2.963532  | 0.352618  | -5.577895  | 2.957971  | 0.365201  | -5.579618  | 2.939923  | 0.104965  | -5.476436  |
| C | 2.478045  | -1.196094 | -7.273979  | 2.485674  | -1.188577 | -7.274802  | 2.411396  | -1.339326 | -7.262954  |
| C | 3.837373  | -1.483071 | -7.426494  | 3.846674  | -1.47244  | -7.4195    | 3.746824  | -1.723759 | -7.372629  |
| C | 1.399871  | -1.830917 | -8.062272  | 1.412899  | -1.82901  | -8.065937  | 1.314399  | -1.871178 | -8.09584   |
| C | -0.920241 | -1.949595 | -8.402063  | -0.905326 | -1.956586 | -8.414087  | -1.009048 | -1.793345 | -8.491656  |
| C | -0.759613 | -2.896875 | -9.419383  | -0.737758 | -2.905984 | -9.42837   | -0.893802 | -2.712468 | -9.537485  |
| C | 1.614624  | -2.772731 | -9.072152  | 1.634748  | -2.772683 | -9.072804  | 1.480147  | -2.783075 | -9.137138  |
| C | 0.530218  | -3.33404  | -9.779248  | 0.554994  | -3.339561 | -9.7824    | 0.369066  | -3.232484 | -9.885325  |
| C | 0.003785  | 0.719651  | 1.365379   | 0.004684  | 0.728617  | 1.36194    | 0.001465  | 0.733467  | 1.360166   |
| C | -0.003785 | -0.719651 | 1.365379   | -0.004684 | -0.728617 | 1.36194    | -0.001465 | -0.733467 | 1.360166   |
| C | 0.003425  | -0.72786  | -0.950533  | 0.003768  | -0.714    | -0.964508  | 0.000996  | -0.713669 | -0.971243  |
| C | -0.003425 | 0.72786   | -0.950533  | -0.003768 | 0.714     | -0.964508  | -0.000996 | 0.713669  | -0.971243  |
| C | 0.010743  | -1.454926 | -2.221617  | 0.012282  | -1.443142 | -2.227203  | -0.000662 | -1.435844 | -2.233154  |
| C | 0.003579  | -0.725554 | -3.421047  | 0.005168  | -0.72178  | -3.435127  | -0.007658 | -0.717332 | -3.443576  |
| C | -0.003579 | 0.725554  | -3.421047  | -0.005168 | 0.72178   | -3.435127  | 0.007658  | 0.717332  | -3.443576  |
| C | -0.010743 | 1.454926  | -2.221617  | -0.012282 | 1.443142  | -2.227203  | 0.000662  | 1.435844  | -2.233154  |
| C | 0.021478  | -2.863819 | -2.29255   | 0.024895  | -2.855972 | -2.29936   | 0.00213   | -2.851081 | -2.314333  |
| C | 0.025278  | -3.475693 | -3.549545  | 0.030759  | -3.47172  | -3.551833  | 0.003617  | -3.470548 | -3.564011  |
| C | 0.013366  | -2.680105 | -4.711322  | 0.019452  | -2.680851 | -4.720992  | -0.004642 | -2.684101 | -4.736563  |
| C | -0.021478 | 2.863819  | -2.29255   | -0.024895 | 2.855972  | -2.29936   | -0.00213  | 2.851081  | -2.314333  |
| C | -0.025278 | 3.475693  | -3.549545  | -0.030759 | 3.47172   | -3.551833  | -0.003617 | 3.470548  | -3.564011  |
| C | -0.013366 | 2.680105  | -4.711322  | -0.019452 | 2.680851  | -4.720992  | 0.004642  | 2.684101  | -4.736563  |
| C | -6.28781  | 1.161123  | -6.81875   | -6.293071 | 1.142392  | -6.799692  | -6.184591 | 1.60882   | -6.65432   |
| C | -6.508984 | 2.668326  | -6.552823  | -6.517289 | 2.648485  | -6.530281  | -6.275741 | 3.137061  | -6.431058  |
| C | -6.695984 | 0.833246  | -8.273873  | -6.708441 | 0.815602  | -8.252987  | -6.673181 | 1.267791  | -8.081995  |
| C | -7.182913 | 0.35602   | -5.863029  | -7.180741 | 0.333392  | -5.840304  | -7.097777 | 0.90536   | -5.637707  |
| C | 6.28781   | -1.161123 | -6.81875   | 6.293071  | -1.142392 | -6.799692  | 6.184591  | -1.60882  | -6.65432   |
| C | 6.508984  | -2.668326 | -6.552823  | 6.517289  | -2.648485 | -6.530281  | 6.275741  | -3.137061 | -6.431058  |
| C | 6.695984  | -0.833246 | -8.273873  | 6.708441  | -0.815602 | -8.252987  | 6.673181  | -1.267791 | -8.081995  |
| C | 7.182913  | -0.35602  | -5.863029  | 7.180741  | -0.333392 | -5.840304  | 7.097777  | -0.90536  | -5.637707  |
| C | -0.789426 | 4.364783  | -10.877886 | -0.821787 | 4.372045  | -10.877724 | -0.57431  | 4.235688  | -11.017799 |
| C | -1.673935 | 3.722844  | -11.972051 | -1.707066 | 3.729383  | -11.970799 | -1.524489 | 3.614551  | -12.069045 |
| C | -1.530734 | 5.576969  | -10.267655 | -1.565945 | 5.579909  | -10.262501 | -1.217378 | 5.518453  | -10.439831 |
| C | 0.514042  | 4.859345  | -11.525248 | 0.477676  | 4.873389  | -11.527949 | 0.747782  | 4.611231  | -11.70562  |

|   |           |           |            |           |           |            |           |           |            |
|---|-----------|-----------|------------|-----------|-----------|------------|-----------|-----------|------------|
| C | 0.789426  | -4.364783 | -10.877886 | 0.821787  | -4.372045 | -10.877724 | 0.57431   | -4.235688 | -11.017799 |
| C | 1.673935  | -3.722844 | -11.972051 | 1.707066  | -3.729383 | -11.970799 | 1.524489  | -3.614551 | -12.069045 |
| C | 1.530734  | -5.576969 | -10.267655 | 1.565945  | -5.579909 | -10.262501 | 1.217378  | -5.518453 | -10.439831 |
| C | -0.514042 | -4.859345 | -11.525248 | -0.477676 | -4.873389 | -11.527949 | -0.747782 | -4.611231 | -11.70562  |
| H | 0.059828  | 3.450992  | 4.117196   | 0.087164  | 3.427342  | 4.127542   | 0.018895  | 3.435874  | 4.117828   |
| H | 0.075425  | 4.544167  | 6.397328   | 0.127447  | 4.546446  | 6.391042   | 0.019589  | 4.541174  | 6.389912   |
| H | 0.027514  | 3.111255  | 8.440126   | 0.076291  | 3.134238  | 8.451833   | -0.009091 | 3.120094  | 8.444959   |
| H | -0.027514 | -3.111255 | 8.440126   | -0.076291 | -3.134238 | 8.451833   | 0.009091  | -3.120094 | 8.444959   |
| H | -0.075425 | -4.544167 | 6.397328   | -0.127447 | -4.546446 | 6.391042   | -0.019589 | -4.541174 | 6.389912   |
| H | -0.059828 | -3.450992 | 4.117196   | -0.087164 | -3.427342 | 4.127542   | -0.018895 | -3.435874 | 4.117828   |
| H | 5.000866  | -0.614816 | 7.7255     | 4.96354   | -0.361341 | 7.528477   | 4.997104  | -0.556865 | 7.705534   |
| H | 2.550823  | -1.065324 | 7.578164   | 2.524353  | -0.889369 | 7.433547   | 2.551349  | -1.043137 | 7.582086   |
| H | 4.172426  | 2.235868  | 10.864644  | 4.145477  | 2.315035  | 10.821258  | 4.154625  | 2.302374  | 10.833251  |
| H | -1.905204 | 1.564549  | 10.841654  | -1.912249 | 1.428081  | 10.949868  | -1.912325 | 1.537147  | 10.864369  |
| H | -1.650134 | 3.23407   | 12.679294  | -1.662777 | 3.051183  | 12.83153   | -1.668516 | 3.216043  | 12.696441  |
| H | 2.624724  | 3.082343  | 12.070209  | 2.597278  | 3.071106  | 12.106227  | 2.603589  | 3.125317  | 12.055812  |
| H | -5.000866 | 0.614816  | 7.7255     | -4.96354  | 0.361341  | 7.528477   | -4.997104 | 0.556865  | 7.705534   |
| H | -2.550823 | 1.065324  | 7.578164   | -2.524353 | 0.889369  | 7.433547   | -2.551349 | 1.043137  | 7.582086   |
| H | -4.172426 | -2.235868 | 10.864644  | -4.145477 | -2.315035 | 10.821258  | -4.154625 | -2.302374 | 10.833251  |
| H | 1.905204  | -1.564549 | 10.841654  | 1.912249  | -1.428081 | 10.949868  | 1.912325  | -1.537147 | 10.864369  |
| H | 1.650134  | -3.23407  | 12.679294  | 1.662777  | -3.051183 | 12.83153   | 1.668516  | -3.216043 | 12.696441  |
| H | -2.624724 | -3.082343 | 12.070209  | -2.597278 | -3.071106 | 12.106227  | -2.603589 | -3.125317 | 12.055812  |
| H | -5.016027 | -0.643215 | -5.044044  | -5.00693  | -0.661667 | -5.035079  | -4.982612 | -0.214813 | -4.856767  |
| H | -2.583801 | -1.074773 | -4.863528  | -2.571383 | -1.086901 | -4.868369  | -2.587199 | -0.821391 | -4.743389  |
| H | -4.147734 | 2.214879  | -8.165709  | -4.162751 | 2.205581  | -8.155016  | -4.031312 | 2.454735  | -8.122177  |
| H | 1.905326  | 1.60306   | -8.109546  | 1.892503  | 1.612235  | -8.125678  | 1.971644  | 1.381923  | -8.209808  |
| H | 1.643832  | 3.279085  | -9.915582  | 1.618774  | 3.292639  | -9.926894  | 1.79085   | 3.008057  | -10.06745  |
| H | -2.629312 | 3.07348   | -9.313198  | -2.651441 | 3.07038   | -9.309406  | -2.474319 | 3.147447  | -9.373387  |
| H | 5.016027  | 0.643215  | -5.044044  | 5.00693   | 0.661667  | -5.035079  | 4.982612  | 0.214813  | -4.856767  |
| H | 2.583801  | 1.074773  | -4.863528  | 2.571383  | 1.086901  | -4.868369  | 2.587199  | 0.821391  | -4.743389  |
| H | 4.147734  | -2.214879 | -8.165709  | 4.162751  | -2.205581 | -8.155016  | 4.031312  | -2.454735 | -8.122177  |
| H | -1.905326 | -1.60306  | -8.109546  | -1.892503 | -1.612235 | -8.125678  | -1.971644 | -1.381923 | -8.209808  |
| H | -1.643832 | -3.279085 | -9.915582  | -1.618774 | -3.292639 | -9.926894  | -1.79085  | -3.008057 | -10.06745  |
| H | 2.629312  | -3.07348  | -9.313198  | 2.651441  | -3.07038  | -9.309406  | 2.474319  | -3.147447 | -9.373387  |
| H | 0.026457  | -3.44404  | -1.376252  | 0.029846  | -3.431808 | -1.380261  | 0.005661  | -3.426666 | -1.394888  |
| H | 0.034775  | -4.554615 | -3.647294  | 0.041572  | -4.551315 | -3.6456    | 0.009038  | -4.549841 | -3.655451  |
| H | 0.007244  | -3.124696 | -5.700434  | 0.015499  | -3.13125  | -5.70772   | -0.01168  | -3.137858 | -5.721452  |
| H | -0.026457 | 3.44404   | -1.376252  | -0.029846 | 3.431808  | -1.380261  | -0.005661 | 3.426666  | -1.394888  |
| H | -0.034775 | 4.554615  | -3.647294  | -0.041572 | 4.551315  | -3.6456    | -0.009038 | 4.549841  | -3.655451  |
| H | -0.007244 | 3.124696  | -5.700434  | -0.015499 | 3.13125   | -5.70772   | 0.01168   | 3.137858  | -5.721452  |
| H | 5.831165  | 1.070894  | 9.410904   | 5.787194  | 1.26728   | 9.266728   | 5.817803  | 1.151682  | 9.372703   |
| H | -5.831165 | -1.070894 | 9.410904   | -5.787194 | -1.26728  | 9.266728   | -5.817803 | -1.151682 | 9.372703   |
| H | 0.667445  | 4.014811  | 13.304474  | 0.64107   | 3.891517  | 13.414158  | 0.641967  | 4.032892  | 13.30202   |
| H | -0.667445 | -4.014811 | 13.304474  | -0.64107  | -3.891517 | 13.414158  | -0.641967 | -4.032892 | 13.30202   |
| H | -6.234762 | 2.929583  | -5.522551  | -6.237894 | 2.908953  | -5.501189  | -5.937481 | 3.40838   | -5.422895  |
| H | -5.921014 | 3.293895  | -7.236655  | -5.934963 | 3.276772  | -7.216468  | -5.675345 | 3.695054  | -7.160819  |
| H | -7.569343 | 2.911069  | -6.70154   | -7.579191 | 2.888459  | -6.672573  | -7.320587 | 3.45388   | -6.54294   |
| H | -6.556873 | -0.234058 | -8.48952   | -6.567366 | -0.250978 | -8.471023  | -6.625679 | 0.187022  | -8.266431  |
| H | -7.755907 | 1.080741  | -8.418142  | -7.769857 | 1.060234  | -8.391253  | -7.715918 | 1.592405  | -8.191352  |



|   |           |           |            |           |           |            |           |           |            |
|---|-----------|-----------|------------|-----------|-----------|------------|-----------|-----------|------------|
| H | -6.112384 | 1.412309  | -9.001078  | -6.130335 | 1.397425  | -8.982401  | -6.07981  | 1.777791  | -8.851509  |
| H | -8.230513 | 0.63074   | -6.03923   | -8.230106 | 0.605378  | -6.010276  | -8.127439 | 1.253401  | -5.785644  |
| H | -7.086597 | -0.725136 | -6.030497  | -7.08219  | -0.747248 | -6.009831  | -7.090544 | -0.184745 | -5.770176  |
| H | -6.951516 | 0.57151   | -4.811195  | -6.944006 | 0.547984  | -4.789476  | -6.811264 | 1.138059  | -4.603408  |
| H | 6.234762  | -2.929583 | -5.522551  | 6.237894  | -2.908953 | -5.501189  | 5.937481  | -3.40838  | -5.422895  |
| H | 5.921014  | -3.293895 | -7.236655  | 5.934963  | -3.276772 | -7.216468  | 5.675345  | -3.695054 | -7.160819  |
| H | 7.569343  | -2.911069 | -6.70154   | 7.579191  | -2.888459 | -6.672573  | 7.320587  | -3.45388  | -6.54294   |
| H | 6.556873  | 0.234058  | -8.48952   | 6.567366  | 0.250978  | -8.471023  | 6.625679  | -0.187022 | -8.266431  |
| H | 7.755907  | -1.080741 | -8.418142  | 7.769857  | -1.060234 | -8.391253  | 7.715918  | -1.592405 | -8.191352  |
| H | 6.112384  | -1.412309 | -9.001078  | 6.130335  | -1.397425 | -8.982401  | 6.07981   | -1.777791 | -8.851509  |
| H | 8.230513  | -0.63074  | -6.03923   | 8.230106  | -0.605378 | -6.010276  | 8.127439  | -1.253401 | -5.785644  |
| H | 7.086597  | 0.725136  | -6.030497  | 7.08219   | 0.747248  | -6.009831  | 7.090544  | 0.184745  | -5.770176  |
| H | 6.951516  | -0.57151  | -4.811195  | 6.944006  | -0.547984 | -4.789476  | 6.811264  | -1.138059 | -4.603408  |
| H | -1.169282 | 2.862368  | -12.430072 | -1.200213 | 2.87224   | -12.432662 | -1.092684 | 2.702301  | -12.49998  |
| H | -2.638223 | 3.385288  | -11.570727 | -2.668515 | 3.386546  | -11.567126 | -2.503872 | 3.366672  | -11.640288 |
| H | -1.87604  | 4.46405   | -12.756407 | -1.914978 | 4.471702  | -12.752619 | -1.685185 | 4.337802  | -12.878779 |
| H | -0.923078 | 6.058084  | -9.490337  | -0.957733 | 6.061567  | -9.485939  | -0.56242  | 5.985517  | -9.693398  |
| H | -1.731533 | 6.313958  | -11.056337 | -1.772214 | 6.318013  | -11.048762 | -1.381237 | 6.235667  | -11.254306 |
| H | -2.492369 | 5.286634  | -9.825181  | -2.524968 | 5.284676  | -9.817593  | -2.188535 | 5.314682  | -9.971069  |
| H | 0.270124  | 5.594195  | -12.302728 | 0.228486  | 5.609309  | -12.302769 | 0.539875  | 5.334553  | -12.503607 |
| H | 1.169999  | 5.349578  | -10.793389 | 1.134033  | 5.364187  | -10.79682  | 1.452504  | 5.078673  | -11.004999 |
| H | 1.068119  | 4.038833  | -12.000661 | 1.033455  | 4.056239  | -12.007164 | 1.231     | 3.73779   | -12.163379 |
| H | 1.169282  | -2.862368 | -12.430072 | 1.200213  | -2.87224  | -12.432662 | 1.092684  | -2.702301 | -12.49998  |
| H | 2.638223  | -3.385288 | -11.570727 | 2.668515  | -3.386546 | -11.567126 | 2.503872  | -3.366672 | -11.640288 |
| H | 1.87604   | -4.46405  | -12.756407 | 1.914978  | -4.471702 | -12.752619 | 1.685185  | -4.337802 | -12.878779 |
| H | 0.923078  | -6.058084 | -9.490337  | 0.957733  | -6.061567 | -9.485939  | 0.56242   | -5.985517 | -9.693398  |
| H | 1.731533  | -6.313958 | -11.056337 | 1.772214  | -6.318013 | -11.048762 | 1.381237  | -6.235667 | -11.254306 |
| H | 2.492369  | -5.286634 | -9.825181  | 2.524968  | -5.284676 | -9.817593  | 2.188535  | -5.314682 | -9.971069  |
| H | -0.270124 | -5.594195 | -12.302728 | -0.228486 | -5.609309 | -12.302769 | -0.539875 | -5.334553 | -12.503607 |
| H | -1.169999 | -5.349578 | -10.793389 | -1.134033 | -5.364187 | -10.79682  | -1.452504 | -5.078673 | -11.004999 |
| H | -1.068119 | -4.038833 | -12.000661 | -1.033455 | -4.056239 | -12.007164 | -1.231    | -3.73779  | -12.163379 |

| RuOs5 | S0        |           |            | S1        |           |            | T1        |           |            |
|-------|-----------|-----------|------------|-----------|-----------|------------|-----------|-----------|------------|
|       | Atom      | X         | Y          | Z         | X         | Y          | Z         | X         | Y          |
| Os    | 0         | 0         | 6.88838    | 0         | 0         | 6.8929     | 0         | 0         | 6.902633   |
| Ru    | 0         | 0         | -8.327407  | 0         | 0         | -8.33695   | 0         | 0         | -8.341965  |
| N     | -0.001057 | 1.417181  | -1.89113   | -0.006347 | 1.41748   | -1.883825  | -0.022235 | 1.42318   | -1.886543  |
| N     | 0.001057  | -1.417181 | -1.89113   | 0.006347  | -1.41748  | -1.883825  | 0.022235  | -1.42318  | -1.886543  |
| N     | 0.018212  | 1.331088  | -6.731025  | 0.005193  | 1.335398  | -6.743143  | -0.02511  | 1.335912  | -6.748782  |
| N     | -0.018212 | -1.331088 | -6.731025  | -0.005193 | -1.335398 | -6.743143  | 0.02511   | -1.335912 | -6.748782  |
| N     | -2.046651 | 0.309982  | -8.427448  | -2.048764 | 0.287952  | -8.43085   | -2.054772 | 0.238237  | -8.434729  |
| N     | -0.111907 | 1.428636  | -9.818228  | -0.131414 | 1.430288  | -9.824466  | -0.166661 | 1.429116  | -9.827011  |
| N     | 2.046651  | -0.309982 | -8.427448  | 2.048764  | -0.287952 | -8.43085   | 2.054772  | -0.238237 | -8.434729  |
| N     | 0.111907  | -1.428636 | -9.818228  | 0.131414  | -1.430288 | -9.824466  | 0.166661  | -1.429116 | -9.827011  |
| N     | 2.046766  | 0.264252  | 6.996812   | 2.037932  | 0.334378  | 6.948996   | 2.040949  | 0.35665   | 6.96183    |
| N     | 0.112469  | 1.423069  | 8.382659   | 0.098372  | 1.391202  | 8.431835   | 0.087306  | 1.392952  | 8.435407   |
| N     | -2.046766 | -0.264252 | 6.996812   | -2.037932 | -0.334378 | 6.948996   | -2.040949 | -0.35665  | 6.96183    |
| N     | -0.112469 | -1.423069 | 8.382659   | -0.098372 | -1.391202 | 8.431835   | -0.087306 | -1.392952 | 8.435407   |
| N     | 0         | 1.417204  | 0.454551   | 0         | 1.426415  | 0.458927   | 0.000102  | 1.427621  | 0.454196   |
| N     | 0         | -1.417204 | 0.454551   | 0         | -1.426415 | 0.458927   | -0.000102 | -1.427621 | 0.454196   |
| N     | 0.019796  | -1.314026 | 5.300524   | 0.016453  | -1.334101 | 5.32485    | 0.002639  | -1.328707 | 5.314599   |
| N     | -0.019796 | 1.314026  | 5.300524   | -0.016453 | 1.334101  | 5.32485    | -0.002639 | 1.328707  | 5.314599   |
| C     | 0.000818  | -0.727619 | -3.034128  | 0.004619  | -0.713694 | -3.046059  | 0.015554  | -0.712525 | -3.049832  |
| C     | -0.000818 | 0.727619  | -3.034128  | -0.004619 | 0.713694  | -3.046059  | -0.015554 | 0.712525  | -3.049832  |
| C     | 0.001024  | 1.454645  | -4.305251  | -0.0092   | 1.442528  | -4.308613  | -0.036796 | 1.438862  | -4.311664  |
| C     | 0.004061  | 0.72561   | -5.504726  | -0.002178 | 0.721678  | -5.516872  | -0.017375 | 0.720288  | -5.522684  |
| C     | -0.004061 | -0.72561  | -5.504726  | 0.002178  | -0.721678 | -5.516872  | 0.017375  | -0.720288 | -5.522684  |
| C     | -0.001024 | -1.454645 | -4.305251  | 0.0092    | -1.442528 | -4.308613  | 0.036796  | -1.438862 | -4.311664  |
| C     | 0.005129  | 2.863678  | -4.375875  | -0.016399 | 2.855604  | -4.380608  | -0.073746 | 2.852721  | -4.384696  |
| C     | 0.012011  | 3.476107  | -5.632336  | -0.016238 | 3.472037  | -5.632452  | -0.089494 | 3.469861  | -5.635575  |
| C     | 0.018755  | 2.680745  | -6.794391  | -0.005048 | 2.681572  | -6.802051  | -0.063947 | 2.680921  | -6.806885  |
| C     | -0.018755 | -2.680745 | -6.794391  | 0.005048  | -2.681572 | -6.802051  | 0.063947  | -2.680921 | -6.806885  |
| C     | -0.012011 | -3.476107 | -5.632336  | 0.016238  | -3.472037 | -5.632452  | 0.089494  | -3.469861 | -5.635575  |
| C     | -0.005129 | -2.863678 | -4.375875  | 0.016399  | -2.855604 | -4.380608  | 0.073746  | -2.852721 | -4.384696  |
| C     | -4.762331 | 0.919246  | -8.6768    | -4.771337 | 0.872822  | -8.664383  | -4.791004 | 0.756705  | -8.665518  |
| C     | -4.328513 | -0.034371 | -7.739778  | -4.323703 | -0.079476 | -7.732361  | -4.319778 | -0.1878   | -7.737146  |
| C     | -2.960452 | -0.312394 | -7.642289  | -2.952606 | -0.345021 | -7.642504  | -2.942541 | -0.419822 | -7.648576  |
| C     | -2.45736  | 1.240399  | -9.343937  | -2.472691 | 1.218264  | -9.341351  | -2.501666 | 1.161594  | -9.341254  |
| C     | -3.814852 | 1.562518  | -9.486192  | -3.83399  | 1.527959  | -9.476006  | -3.870299 | 1.437953  | -9.474654  |
| C     | -1.373884 | 1.851987  | -10.139183 | -1.398439 | 1.843779  | -10.138228 | -1.443229 | 1.816025  | -10.136056 |
| C     | 0.956881  | 1.92242   | -10.491017 | 0.929968  | 1.937012  | -10.499452 | 0.881749  | 1.962663  | -10.501718 |
| C     | 0.812494  | 2.86808   | -11.512443 | 0.772876  | 2.886139  | -11.51576  | 0.701506  | 2.913362  | -11.512686 |
| C     | -1.581322 | 2.796472  | -11.154873 | -1.618721 | 2.791419  | -11.1485   | -1.686582 | 2.764406  | -11.140389 |
| C     | -0.477654 | 3.31229   | -11.849511 | -0.522744 | 3.320558  | -11.845199 | -0.60414  | 3.32129   | -11.836596 |
| C     | 4.762331  | -0.919246 | -8.6768    | 4.771337  | -0.872822 | -8.664383  | 4.791004  | -0.756705 | -8.665518  |
| C     | 4.328513  | 0.034371  | -7.739778  | 4.323703  | 0.079476  | -7.732361  | 4.319778  | 0.1878    | -7.737146  |
| C     | 2.960452  | 0.312394  | -7.642289  | 2.952606  | 0.345021  | -7.642504  | 2.942541  | 0.419822  | -7.648576  |
| C     | 2.45736   | -1.240399 | -9.343937  | 2.472691  | -1.218264 | -9.341351  | 2.501666  | -1.161594 | -9.341254  |
| C     | 3.814852  | -1.562518 | -9.486192  | 3.83399   | -1.527959 | -9.476006  | 3.870299  | -1.437953 | -9.474654  |
| C     | 1.373884  | -1.851987 | -10.139183 | 1.398439  | -1.843779 | -10.138228 | 1.443229  | -1.816025 | -10.136056 |
| C     | -0.956881 | -1.92242  | -10.491017 | -0.929968 | -1.937012 | -10.499452 | -0.881749 | -1.962663 | -10.501718 |

|   |           |           |            |           |           |            |           |           |            |
|---|-----------|-----------|------------|-----------|-----------|------------|-----------|-----------|------------|
| C | -0.812494 | -2.86808  | -11.512443 | -0.772876 | -2.886139 | -11.51576  | -0.701506 | -2.913362 | -11.512686 |
| C | 1.581322  | -2.796472 | -11.154873 | 1.618721  | -2.791419 | -11.1485   | 1.686582  | -2.764406 | -11.140389 |
| C | 0.477654  | -3.31229  | -11.849511 | 0.522744  | -3.320558 | -11.845199 | 0.60414   | -3.32129  | -11.836596 |
| C | 4.776822  | 0.874723  | 7.380305   | 4.74172   | 1.029978  | 7.26793    | 4.734209  | 1.095339  | 7.272808   |
| C | 4.368911  | -0.048662 | 6.419525   | 4.339533  | 0.135458  | 6.278436   | 4.344937  | 0.183254  | 6.293892   |
| C | 2.995106  | -0.33532  | 6.248978   | 2.972519  | -0.192533 | 6.134946   | 2.983421  | -0.167468 | 6.154649   |
| C | 2.44335   | 1.186488  | 7.942667   | 2.423598  | 1.23449   | 7.919664   | 2.413225  | 1.272762  | 7.921836   |
| C | 3.794133  | 1.522338  | 8.175961   | 3.766053  | 1.613433  | 8.121885   | 3.750314  | 1.673113  | 8.120693   |
| C | 1.400087  | 1.803859  | 8.697922   | 1.382837  | 1.798942  | 8.717113   | 1.36533   | 1.824955  | 8.716055   |
| C | -0.906155 | 1.971796  | 9.074964   | -0.919281 | 1.866986  | 9.171169   | -0.939412 | 1.8558    | 9.174308   |
| C | -0.683941 | 2.925123  | 10.095136  | -0.698059 | 2.794664  | 10.215516  | -0.732406 | 2.793982  | 10.210142  |
| C | 1.702664  | 2.751419  | 9.699046   | 1.684534  | 2.719795  | 9.741478   | 1.651611  | 2.757828  | 9.733733   |
| C | 0.614018  | 3.321826  | 10.411433  | 0.59484   | 3.225638  | 10.501735  | 0.554018  | 3.249788  | 10.491358  |
| C | -4.776822 | -0.874723 | 7.380305   | -4.74172  | -1.029978 | 7.26793    | -4.734209 | -1.095339 | 7.272808   |
| C | -4.368911 | 0.048662  | 6.419525   | -4.339533 | -0.135458 | 6.278436   | -4.344937 | -0.183254 | 6.293892   |
| C | -2.995106 | 0.33532   | 6.248978   | -2.972519 | 0.192533  | 6.134946   | -2.983421 | 0.167468  | 6.154649   |
| C | -2.44335  | -1.186488 | 7.942667   | -2.423598 | -1.23449  | 7.919664   | -2.413225 | -1.272762 | 7.921836   |
| C | -3.794133 | -1.522338 | 8.175961   | -3.766053 | -1.613433 | 8.121885   | -3.750314 | -1.673113 | 8.120693   |
| C | -1.400087 | -1.803859 | 8.697922   | -1.382837 | -1.798942 | 8.717113   | -1.36533  | -1.824955 | 8.716055   |
| C | 0.906155  | -1.971796 | 9.074964   | 0.919281  | -1.866986 | 9.171169   | 0.939412  | -1.8558   | 9.174308   |
| C | 0.683941  | -2.925123 | 10.095136  | 0.698059  | -2.794664 | 10.215516  | 0.732406  | -2.793982 | 10.210142  |
| C | -1.702664 | -2.751419 | 9.699046   | -1.684534 | -2.719795 | 9.741478   | -1.651611 | -2.757828 | 9.733733   |
| C | -0.614018 | -3.321826 | 10.411433  | -0.59484  | -3.225638 | 10.501735  | -0.554018 | -3.249788 | 10.491358  |
| C | -0.000253 | 0.719675  | -0.718395  | -0.001601 | 0.729023  | -0.719373  | -0.005696 | 0.733412  | -0.717685  |
| C | 0.000253  | -0.719675 | -0.718395  | 0.001601  | -0.729023 | -0.719373  | 0.005696  | -0.733412 | -0.717685  |
| C | -0.000227 | -0.728292 | 1.597724   | -0.001351 | -0.724769 | 1.611376   | -0.004146 | -0.713978 | 1.613761   |
| C | 0.000227  | 0.728292  | 1.597724   | 0.001351  | 0.724769  | 1.611376   | 0.004146  | 0.713978  | 1.613761   |
| C | 0.002083  | -1.457382 | 2.868239   | -0.001445 | -1.439112 | 2.876331   | -0.011755 | -1.436834 | 2.875174   |
| C | 0.004849  | -0.722459 | 4.063044   | 0.007811  | -0.708353 | 4.090072   | 0         | -0.715666 | 4.082976   |
| C | -0.004849 | 0.722459  | 4.063044   | -0.007811 | 0.708353  | 4.090072   | 0         | 0.715666  | 4.082976   |
| C | -0.002083 | 1.457382  | 2.868239   | 0.001445  | 1.439112  | 2.876331   | 0.011755  | 1.436834  | 2.875174   |
| C | 0.00509   | -2.864503 | 2.945362   | -0.011893 | -2.847722 | 2.963379   | -0.030558 | -2.851049 | 2.96084    |
| C | 0.010144  | -3.466289 | 4.209066   | -0.020178 | -3.468428 | 4.217855   | -0.044206 | -3.463777 | 4.21438    |
| C | 0.01748   | -2.668914 | 5.366755   | -0.011036 | -2.679392 | 5.386061   | -0.03189  | -2.675657 | 5.384314   |
| C | -0.00509  | 2.864503  | 2.945362   | 0.011893  | 2.847722  | 2.963379   | 0.030558  | 2.851049  | 2.96084    |
| C | -0.010144 | 3.466289  | 4.209066   | 0.020178  | 3.468428  | 4.217855   | 0.044206  | 3.463777  | 4.21438    |
| C | -0.01748  | 2.668914  | 5.366755   | 0.011036  | 2.679392  | 5.386061   | 0.03189   | 2.675657  | 5.384314   |
| C | 4.092872  | 2.495607  | 9.202407   | 4.064546  | 2.561822  | 9.169843   | 4.033571  | 2.634451  | 9.161154   |
| C | -4.092872 | -2.495607 | 9.202407   | -4.064546 | -2.561822 | 9.169843   | -4.033571 | -2.634451 | 9.161154   |
| C | 3.089929  | 3.083031  | 9.934692   | 3.065074  | 3.090235  | 9.950662   | 3.026086  | 3.152542  | 9.938714   |
| C | -3.089929 | -3.083031 | 9.934692   | -3.065074 | -3.090235 | 9.950662   | -3.026086 | -3.152542 | 9.938714   |
| H | 0.003862  | 3.443456  | -3.459284  | -0.021261 | 3.430881  | -3.461157  | -0.089146 | 3.426897  | -3.464665  |
| H | 0.01492   | 4.555027  | -5.729895  | -0.022076 | 4.551638  | -5.725926  | -0.118619 | 4.54929   | -5.728082  |
| H | 0.03346   | 3.1265    | -7.782807  | 0.004306  | 3.133322  | -7.788039  | -0.066214 | 3.133936  | -7.792408  |
| H | -0.03346  | -3.1265   | -7.782807  | -0.004306 | -3.133322 | -7.788039  | 0.066214  | -3.133936 | -7.792408  |
| H | -0.01492  | -4.555027 | -5.729895  | 0.022076  | -4.551638 | -5.725926  | 0.118619  | -4.54929  | -5.728082  |
| H | -0.003862 | -3.443456 | -3.459284  | 0.021261  | -3.430881 | -3.461157  | 0.089146  | -3.426897 | -3.464665  |
| H | -5.028952 | -0.554215 | -7.09665   | -5.0161   | -0.607435 | -7.087058  | -4.998841 | -0.734988 | -7.093674  |
| H | -2.582517 | -1.045098 | -6.938349  | -2.562912 | -1.075084 | -6.942132  | -2.534367 | -1.14234  | -6.95089   |

|   |           |           |            |           |           |            |           |           |            |
|---|-----------|-----------|------------|-----------|-----------|------------|-----------|-----------|------------|
| H | -4.132453 | 2.301879  | -10.21219  | -4.161967 | 2.266976  | -10.197776 | -4.216574 | 2.17105   | -10.193905 |
| H | 1.93273   | 1.553633  | -10.196212 | 1.910154  | 1.575171  | -10.210024 | 1.870316  | 1.621144  | -10.215985 |
| H | 1.690925  | 3.241086  | -12.025988 | 1.645689  | 3.269553  | -12.03131  | 1.564438  | 3.318589  | -12.028216 |
| H | -2.583373 | 3.125517  | -11.404551 | -2.624799 | 3.112762  | -11.39221  | -2.699982 | 3.065372  | -11.379809 |
| H | 5.028952  | 0.554215  | -7.09665   | 5.0161    | 0.607435  | -7.087058  | 4.998841  | 0.734988  | -7.093674  |
| H | 2.582517  | 1.045098  | -6.938349  | 2.562912  | 1.075084  | -6.942132  | 2.534367  | 1.14234   | -6.95089   |
| H | 4.132453  | -2.301879 | -10.21219  | 4.161967  | -2.266976 | -10.197776 | 4.216574  | -2.17105  | -10.193905 |
| H | -1.93273  | -1.553633 | -10.196212 | -1.910154 | -1.575171 | -10.210024 | -1.870316 | -1.621144 | -10.215985 |
| H | -1.690925 | -3.241086 | -12.025988 | -1.645689 | -3.269553 | -12.03131  | -1.564438 | -3.318589 | -12.028216 |
| H | 2.583373  | -3.125517 | -11.404551 | 2.624799  | -3.112762 | -11.39221  | 2.699982  | -3.065372 | -11.379809 |
| H | 5.089708  | -0.561396 | 5.793393   | 5.058448  | -0.320775 | 5.609102   | 5.070269  | -0.26984  | 5.62935    |
| H | 2.661316  | -1.058333 | 5.512954   | 2.639212  | -0.889868 | 5.374767   | 2.662288  | -0.87972  | 5.402749   |
| H | -1.909954 | 1.658147  | 8.810368   | -1.918984 | 1.524522  | 8.927974   | -1.933275 | 1.493194  | 8.936659   |
| H | -1.538955 | 3.337109  | 10.618309  | -1.548565 | 3.158572  | 10.778841  | -1.588015 | 3.146642  | 10.772818  |
| H | -5.089708 | 0.561396  | 5.793393   | -5.058448 | 0.320775  | 5.609102   | -5.070269 | 0.26984   | 5.62935    |
| H | -2.661316 | 1.058333  | 5.512954   | -2.639212 | 0.889868  | 5.374767   | -2.662288 | 0.87972   | 5.402749   |
| H | 1.909954  | -1.658147 | 8.810368   | 1.918984  | -1.524522 | 8.927974   | 1.933275  | -1.493194 | 8.936659   |
| H | 1.538955  | -3.337109 | 10.618309  | 1.548565  | -3.158572 | 10.778841  | 1.588015  | -3.146642 | 10.772818  |
| H | 0.003609  | -3.451772 | 2.033747   | -0.01732  | -3.429063 | 2.047029   | -0.037824 | -3.431262 | 2.044407   |
| H | 0.010978  | -4.544567 | 4.314131   | -0.031911 | -4.547214 | 4.310775   | -0.063158 | -4.542441 | 4.310608   |
| H | 0.031077  | -3.110604 | 6.356726   | -0.010834 | -3.132686 | 6.371506   | -0.034474 | -3.127425 | 6.369862   |
| H | -0.003609 | 3.451772  | 2.033747   | 0.01732   | 3.429063  | 2.047029   | 0.037824  | 3.431262  | 2.044407   |
| H | -0.010978 | 4.544567  | 4.314131   | 0.031911  | 4.547214  | 4.310775   | 0.063158  | 4.542441  | 4.310608   |
| H | -0.031077 | 3.110604  | 6.356726   | 0.010834  | 3.132686  | 6.371506   | 0.034474  | 3.127425  | 6.369862   |
| H | 5.828774  | 1.101806  | 7.524679   | 5.789379  | 1.288256  | 7.388693   | 5.778008  | 1.370373  | 7.38981    |
| H | -5.815957 | 1.157067  | -8.775547  | -5.82769  | 1.1009    | -8.757156  | -5.852695 | 0.958923  | -8.757384  |
| H | -5.828774 | -1.101806 | 7.524679   | -5.789379 | -1.288256 | 7.388693   | -5.778008 | -1.370373 | 7.38981    |
| H | 5.815957  | -1.157067 | -8.775547  | 5.82769   | -1.1009   | -8.757156  | 5.852695  | -0.958923 | -8.757384  |
| H | 0.799403  | 4.05593   | 11.189752  | 0.777067  | 3.940464  | 11.298252  | 0.7242    | 3.973286  | 11.282707  |
| H | -0.621734 | 4.04395   | -12.637138 | -0.676658 | 4.05482   | -12.628576 | -0.775969 | 4.056495  | -12.615362 |
| H | -0.799403 | -4.05593  | 11.189752  | -0.777067 | -3.940464 | 11.298252  | -0.7242   | -3.973286 | 11.282707  |
| H | 0.621734  | -4.04395  | -12.637138 | 0.676658  | -4.05482  | -12.628576 | 0.775969  | -4.056495 | -12.615362 |
| H | 5.13303   | 2.751886  | 9.383284   | 5.099914  | 2.848533  | 9.327382   | 5.064252  | 2.938586  | 9.316675   |
| H | 3.322021  | 3.811816  | 10.706179  | 3.295851  | 3.800019  | 10.739403  | 3.245896  | 3.871622  | 10.72211   |
| H | -3.322021 | -3.811816 | 10.706179  | -3.295851 | -3.800019 | 10.739403  | -3.245896 | -3.871622 | 10.72211   |
| H | -5.13303  | -2.751886 | 9.383284   | -5.099914 | -2.848533 | 9.327382   | -5.064252 | -2.938586 | 9.316675   |

| <b>RuOs6</b> | S0        |           |            | S1        |           |            | T1        |           |            |
|--------------|-----------|-----------|------------|-----------|-----------|------------|-----------|-----------|------------|
| Atom         | X         | Y         | Z          | X         | Y         | Z          | X         | Y         | Z          |
| Os           | 0         | 0         | 4.987801   | 0         | 0         | 4.986495   | 0         | 0         | 5.019043   |
| Ru           | 0         | 0         | -10.228991 | 0         | 0         | -10.244284 | 0         | 0         | -10.220687 |
| N            | -0.588818 | -1.289183 | -3.792316  | -0.609793 | -1.2799   | -3.790659  | -0.647707 | -1.272734 | -3.777253  |
| N            | 0.588818  | 1.289183  | -3.792316  | 0.609793  | 1.2799    | -3.790659  | 0.647707  | 1.272734  | -3.777253  |
| N            | -0.582909 | -1.197285 | -8.632279  | -0.590886 | -1.19802  | -8.650325  | -0.647521 | -1.172865 | -8.632767  |
| N            | 0.582909  | 1.197285  | -8.632279  | 0.590886  | 1.19802   | -8.650325  | 0.647521  | 1.172865  | -8.632767  |
| N            | 1.709799  | -1.166676 | -10.331324 | 1.709398  | -1.165227 | -10.340743 | 1.586649  | -1.328392 | -10.268779 |
| N            | -0.52112  | -1.338314 | -11.716119 | -0.518384 | -1.343097 | -11.727998 | -0.586711 | -1.263139 | -11.749006 |
| N            | -1.709799 | 1.166676  | -10.331324 | -1.709398 | 1.165227  | -10.340743 | -1.586649 | 1.328392  | -10.268779 |
| N            | 0.52112   | 1.338314  | -11.716119 | 0.518384  | 1.343097  | -11.727998 | 0.586711  | 1.263139  | -11.749006 |
| N            | -1.967417 | 0.605199  | 5.102168   | -1.969687 | 0.592081  | 5.04942    | -1.964673 | 0.610557  | 5.118945   |
| N            | -0.701882 | -1.234591 | 6.480921   | -0.706645 | -1.188117 | 6.53128    | -0.715797 | -1.231603 | 6.504934   |
| N            | 1.967417  | -0.605199 | 5.102168   | 1.969687  | -0.592081 | 5.04942    | 1.964673  | -0.610557 | 5.118945   |
| N            | 0.701882  | 1.234591  | 6.480921   | 0.706645  | 1.188117  | 6.53128    | 0.715797  | 1.231603  | 6.504934   |
| N            | -0.588905 | -1.289156 | -1.446569  | -0.619336 | -1.28529  | -1.447977  | -0.628339 | -1.277253 | -1.436396  |
| N            | 0.588905  | 1.289156  | -1.446569  | 0.619336  | 1.28529   | -1.447977  | 0.628339  | 1.277253  | -1.436396  |
| N            | 0.534352  | 1.200857  | 3.399543   | 0.572295  | 1.204613  | 3.417442   | 0.55      | 1.200719  | 3.430856   |
| N            | -0.534352 | -1.200857 | 3.399543   | -0.572295 | -1.204613 | 3.417442   | -0.55     | -1.200719 | 3.430856   |
| C            | 0.302474  | 0.661906  | -4.935354  | 0.305859  | 0.644636  | -4.953192  | 0.327055  | 0.634561  | -4.936492  |
| C            | -0.302474 | -0.661906 | -4.935354  | -0.305859 | -0.644636 | -4.953192  | -0.327055 | -0.634561 | -4.936492  |
| C            | -0.609408 | -1.320874 | -6.206496  | -0.619876 | -1.302339 | -6.215613  | -0.667746 | -1.271142 | -6.198195  |
| C            | -0.309759 | -0.656268 | -7.406183  | -0.313544 | -0.649958 | -7.424189  | -0.341701 | -0.630455 | -7.408296  |
| C            | 0.309759  | 0.656268  | -7.406183  | 0.313544  | 0.649958  | -7.424189  | 0.341701  | 0.630455  | -7.408296  |
| C            | 0.609408  | 1.320874  | -6.206496  | 0.619876  | 1.302339  | -6.215613  | 0.667746  | 1.271142  | -6.198195  |
| C            | -1.204112 | -2.598274 | -6.276861  | -1.229584 | -2.577217 | -6.287377  | -1.326812 | -2.52365  | -6.279627  |
| C            | -1.471462 | -3.14945  | -7.533237  | -1.500275 | -3.131275 | -7.53906   | -1.619504 | -3.069244 | -7.529513  |
| C            | -1.149655 | -2.422327 | -8.695376  | -1.168331 | -2.414141 | -8.7089    | -1.261907 | -2.368949 | -8.702163  |
| C            | 1.149655  | 2.422327  | -8.695376  | 1.168331  | 2.414141  | -8.7089    | 1.261907  | 2.368949  | -8.702163  |
| C            | 1.471462  | 3.14945   | -7.533237  | 1.500275  | 3.131275  | -7.53906   | 1.619504  | 3.069244  | -7.529513  |
| C            | 1.204112  | 2.598274  | -6.276861  | 1.229584  | 2.577217  | -6.287377  | 1.326812  | 2.52365   | -6.279627  |
| C            | 3.891457  | -2.894748 | -10.579575 | 3.891366  | -2.895127 | -10.575302 | 3.574053  | -3.26874  | -10.410809 |
| C            | 3.916976  | -1.843443 | -9.64702   | 3.914795  | -1.839062 | -9.64789   | 3.660106  | -2.232401 | -9.466055  |
| C            | 2.805114  | -0.999298 | -9.549819  | 2.802886  | -0.994237 | -9.557303  | 2.640382  | -1.276653 | -9.416607  |
| C            | 1.674014  | -2.18609  | -11.244533 | 1.675171  | -2.1898   | -11.248175 | 1.48484   | -2.336409 | -11.190969 |
| C            | 2.756729  | -3.066296 | -11.385686 | 2.758215  | -3.070894 | -11.382663 | 2.473027  | -3.323198 | -11.279581 |
| C            | 0.431085  | -2.268285 | -12.037505 | 0.433267  | -2.27603  | -12.042278 | 0.277186  | -2.287105 | -12.035456 |
| C            | -1.701822 | -1.323244 | -12.382855 | -1.698009 | -1.331053 | -12.396802 | -1.717061 | -1.089479 | -12.477775 |
| C            | -1.985756 | -2.240959 | -13.400415 | -1.9815   | -2.254723 | -13.409064 | -2.046121 | -1.958004 | -13.523066 |
| C            | 0.204984  | -3.211642 | -13.05022  | 0.20763   | -3.225631 | -13.049499 | 0         | -3.182821 | -13.074392 |
| C            | -1.016058 | -3.20007  | -13.739964 | -1.012323 | -3.217244 | -13.741077 | -1.175843 | -3.019463 | -13.82307  |
| C            | -3.891457 | 2.894748  | -10.579575 | -3.891366 | 2.895127  | -10.575302 | -3.574053 | 3.26874   | -10.410809 |
| C            | -3.916976 | 1.843443  | -9.64702   | -3.914795 | 1.839062  | -9.64789   | -3.660106 | 2.232401  | -9.466055  |
| C            | -2.805114 | 0.999298  | -9.549819  | -2.802886 | 0.994237  | -9.557303  | -2.640382 | 1.276653  | -9.416607  |
| C            | -1.674014 | 2.18609   | -11.244533 | -1.675171 | 2.1898    | -11.248175 | -1.48484  | 2.336409  | -11.190969 |
| C            | -2.756729 | 3.066296  | -11.385686 | -2.758215 | 3.070894  | -11.382663 | -2.473027 | 3.323198  | -11.279581 |
| C            | -0.431085 | 2.268285  | -12.037505 | -0.433267 | 2.27603   | -12.042278 | -0.277186 | 2.287105  | -12.035456 |
| C            | 1.701822  | 1.323244  | -12.382855 | 1.698009  | 1.331053  | -12.396802 | 1.717061  | 1.089479  | -12.477775 |

|   |           |           |            |           |           |            |           |           |            |
|---|-----------|-----------|------------|-----------|-----------|------------|-----------|-----------|------------|
| C | 1.985756  | 2.240959  | -13.400415 | 1.9815    | 2.254723  | -13.409064 | 2.046121  | 1.958004  | -13.523066 |
| C | -0.204984 | 3.211642  | -13.05022  | -0.20763  | 3.225631  | -13.049499 | 0         | 3.182821  | -13.074392 |
| C | 1.016058  | 3.20007   | -13.739964 | 1.012323  | 3.217244  | -13.741077 | 1.175843  | 3.019463  | -13.82307  |
| C | -4.738014 | 1.169756  | 5.426866   | -4.738183 | 1.142368  | 5.310038   | -4.745549 | 1.15423   | 5.392502   |
| C | -3.938819 | 1.847662  | 4.497953   | -3.94067  | 1.764008  | 4.339786   | -3.932308 | 1.844926  | 4.485117   |
| C | -2.571314 | 1.54975   | 4.353567   | -2.571627 | 1.469519  | 4.222441   | -2.559876 | 1.557422  | 4.365744   |
| C | -2.724412 | -0.059898 | 6.044626   | -2.722419 | -0.022751 | 6.028664   | -2.736093 | -0.064926 | 6.0422     |
| C | -4.099626 | 0.189178  | 6.254265   | -4.099564 | 0.224392  | 6.210443   | -4.116581 | 0.174009  | 6.227173   |
| C | -2.023726 | -1.037077 | 6.822914   | -2.026819 | -0.963072 | 6.854694   | -2.04404  | -1.04306  | 6.826825   |
| C | 0         | -2.160947 | 7.163995   | 0         | -2.066566 | 7.263879   | -0.019365 | -2.155416 | 7.197516   |
| C | -0.573689 | -2.896374 | 8.217774   | -0.576862 | -2.740911 | 8.356703   | -0.60558  | -2.897351 | 8.239612   |
| C | -2.671794 | -1.742124 | 7.861915   | -2.677326 | -1.605691 | 7.930075   | -2.705153 | -1.756429 | 7.851966   |
| C | -1.903168 | -2.693746 | 8.608333   | -1.906333 | -2.513256 | 8.730771   | -1.943255 | -2.705652 | 8.60784    |
| C | 4.738014  | -1.169756 | 5.426866   | 4.738183  | -1.142368 | 5.310038   | 4.745549  | -1.15423  | 5.392502   |
| C | 3.938819  | -1.847662 | 4.497953   | 3.94067   | -1.764008 | 4.339786   | 3.932308  | -1.844926 | 4.485117   |
| C | 2.571314  | -1.54975  | 4.353567   | 2.571627  | -1.469519 | 4.222441   | 2.559876  | -1.557422 | 4.365744   |
| C | 2.724412  | 0.059898  | 6.044626   | 2.722419  | 0.022751  | 6.028664   | 2.736093  | 0.064926  | 6.0422     |
| C | 4.099626  | -0.189178 | 6.254265   | 4.099564  | -0.224392 | 6.210443   | 4.116581  | -0.174009 | 6.227173   |
| C | 2.023726  | 1.037077  | 6.822914   | 2.026819  | 0.963072  | 6.854694   | 2.04404   | 1.04306   | 6.826825   |
| C | 0         | 2.160947  | 7.163995   | 0         | 2.066566  | 7.263879   | 0.019365  | 2.155416  | 7.197516   |
| C | 0.573689  | 2.896374  | 8.217774   | 0.576862  | 2.740911  | 8.356703   | 0.60558   | 2.897351  | 8.239612   |
| C | 2.671794  | 1.742124  | 7.861915   | 2.677326  | 1.605691  | 7.930075   | 2.705153  | 1.756429  | 7.851966   |
| C | 1.903168  | 2.693746  | 8.608333   | 1.906333  | 2.513256  | 8.730771   | 1.943255  | 2.705652  | 8.60784    |
| C | -0.299017 | -0.654769 | -2.619556  | -0.315112 | -0.657802 | -2.626131  | -0.328269 | -0.655997 | -2.605355  |
| C | 0.299017  | 0.654769  | -2.619556  | 0.315112  | 0.657802  | -2.626131  | 0.328269  | 0.655997  | -2.605355  |
| C | 0.302913  | 0.662475  | -0.303335  | 0.315821  | 0.651967  | -0.29514   | 0.311677  | 0.641427  | -0.272993  |
| C | -0.302913 | -0.662475 | -0.303335  | -0.315821 | -0.651967 | -0.29514   | -0.311677 | -0.641427 | -0.272993  |
| C | 0.60465   | 1.326149  | 0.967201   | 0.627961  | 1.29482   | 0.969536   | 0.621868  | 1.301041  | 0.988075   |
| C | 0.297788  | 0.658311  | 2.162194   | 0.30391   | 0.640548  | 2.18285    | 0.305309  | 0.649857  | 2.194521   |
| C | -0.297788 | -0.658311 | 2.162194   | -0.30391  | -0.640548 | 2.18285    | -0.305309 | -0.649857 | 2.194521   |
| C | -0.60465  | -1.326149 | 0.967201   | -0.627961 | -1.29482  | 0.969536   | -0.621868 | -1.301041 | 0.988075   |
| C | 1.189237  | 2.606035  | 1.044302   | 1.250894  | 2.559034  | 1.057004   | 1.228312  | 2.577043  | 1.067091   |
| C | 1.439791  | 3.153206  | 2.308142   | 1.531951  | 3.111416  | 2.311408   | 1.483366  | 3.12821   | 2.324538   |
| C | 1.104242  | 2.430297  | 3.46596    | 1.18383   | 2.402811  | 3.480013   | 1.134418  | 2.417986  | 3.492034   |
| C | -1.189237 | -2.606035 | 1.044302   | -1.250894 | -2.559034 | 1.057004   | -1.228312 | -2.577043 | 1.067091   |
| C | -1.439791 | -3.153206 | 2.308142   | -1.531951 | -3.111416 | 2.311408   | -1.483366 | -3.12821  | 2.324538   |
| C | -1.104242 | -2.430297 | 3.46596    | -1.18383  | -2.402811 | 3.480013   | -1.134418 | -2.417986 | 3.492034   |
| C | -4.75224  | -0.547698 | 7.31202    | -4.756032 | -0.449059 | 7.305871   | -4.783566 | -0.573502 | 7.268912   |
| C | 4.75224   | 0.547698  | 7.31202    | 4.756032  | 0.449059  | 7.305871   | 4.783566  | 0.573502  | 7.268912   |
| C | -4.074346 | -1.467156 | 8.074397   | -4.079214 | -1.320741 | 8.123731   | -4.11332  | -1.491466 | 8.039951   |
| C | 4.074346  | 1.467156  | 8.074397   | 4.079214  | 1.320741  | 8.123731   | 4.11332   | 1.491466  | 8.039951   |
| C | -2.448068 | -3.449823 | 9.76573    | -2.453357 | -3.197034 | 9.929743   | -2.502612 | -3.469484 | 9.753306   |
| C | -3.13573  | -2.79246  | 10.809263  | -3.142888 | -2.474903 | 10.928133  | -3.213267 | -2.820481 | 10.786604  |
| C | -2.220931 | -4.839719 | 9.860605   | -2.225142 | -4.578331 | 10.108386  | -2.266803 | -4.857941 | 9.848564   |
| C | -3.59718  | -3.515228 | 11.920865  | -3.605549 | -3.128054 | 12.081084  | -3.688457 | -3.549754 | 11.888181  |
| C | -2.690476 | -5.563833 | 10.96807   | -2.699151 | -5.232707 | 11.256194  | -2.749588 | -5.588641 | 10.946025  |
| C | -3.381128 | -4.903591 | 12.001226  | -3.390871 | -4.509207 | 12.245351  | -3.463046 | -4.936627 | 11.968864  |
| C | -6.188116 | 1.484464  | 5.508106   | -6.190569 | 1.441819  | 5.355552   | -6.200947 | 1.450951  | 5.442448   |
| C | -7.162141 | 0.462312  | 5.491361   | -7.14911  | 0.406043  | 5.411287   | -7.159726 | 0.415336  | 5.395555   |

|   |           |           |            |           |           |            |           |           |            |
|---|-----------|-----------|------------|-----------|-----------|------------|-----------|-----------|------------|
| C | -6.606523 | 2.832298  | 5.538504   | -6.625046 | 2.782845  | 5.276861   | -6.63942  | 2.792313  | 5.472583   |
| C | -8.528651 | 0.783848  | 5.515603   | -8.519202 | 0.709907  | 5.399615   | -8.530955 | 0.716791  | 5.390537   |
| C | -7.972929 | 3.15329   | 5.571699   | -7.995376 | 3.085606  | 5.278953   | -8.010866 | 3.093345  | 5.476216   |
| C | -8.938293 | 2.129463  | 5.561251   | -8.946012 | 2.049723  | 5.340669   | -8.960985 | 2.056044  | 5.436235   |
| C | 2.448068  | 3.449823  | 9.76573    | 2.453357  | 3.197034  | 9.929743   | 2.502612  | 3.469484  | 9.753306   |
| C | 3.13573   | 2.79246   | 10.809263  | 3.142888  | 2.474903  | 10.928133  | 3.213267  | 2.820481  | 10.786604  |
| C | 2.220931  | 4.839719  | 9.860605   | 2.225142  | 4.578331  | 10.108386  | 2.266803  | 4.857941  | 9.848564   |
| C | 3.59718   | 3.515228  | 11.920865  | 3.605549  | 3.128054  | 12.081084  | 3.688457  | 3.549754  | 11.888181  |
| C | 2.690476  | 5.563833  | 10.96807   | 2.699151  | 5.232707  | 11.256194  | 2.749588  | 5.588641  | 10.946025  |
| C | 3.381128  | 4.903591  | 12.001226  | 3.390871  | 4.509207  | 12.245351  | 3.463046  | 4.936627  | 11.968864  |
| C | 6.188116  | -1.484464 | 5.508106   | 6.190569  | -1.441819 | 5.355552   | 6.200947  | -1.450951 | 5.442448   |
| C | 7.162141  | -0.462312 | 5.491361   | 7.14911   | -0.406043 | 5.411287   | 7.159726  | -0.415336 | 5.395555   |
| C | 6.606523  | -2.832298 | 5.538504   | 6.625046  | -2.782845 | 5.276861   | 6.63942   | -2.792313 | 5.472583   |
| C | 8.528651  | -0.783848 | 5.515603   | 8.519202  | -0.709907 | 5.399615   | 8.530955  | -0.716791 | 5.390537   |
| C | 7.972929  | -3.15329  | 5.571699   | 7.995376  | -3.085606 | 5.278953   | 8.010866  | -3.093345 | 5.476216   |
| C | 8.938293  | -2.129463 | 5.561251   | 8.946012  | -2.049723 | 5.340669   | 8.960985  | -2.056044 | 5.436235   |
| H | -1.443067 | -3.126353 | -5.360164  | -1.474735 | -3.097145 | -5.367627  | -1.589376 | -3.035561 | -5.359938  |
| H | -1.926255 | -4.127877 | -7.630558  | -1.965401 | -4.105604 | -7.632258  | -2.120176 | -4.025323 | -7.62144   |
| H | -1.353298 | -2.819603 | -9.683562  | -1.374549 | -2.816586 | -9.694709  | -1.483533 | -2.766778 | -9.686318  |
| H | 1.353298  | 2.819603  | -9.683562  | 1.374549  | 2.816586  | -9.694709  | 1.483533  | 2.766778  | -9.686318  |
| H | 1.926255  | 4.127877  | -7.630558  | 1.965401  | 4.105604  | -7.632258  | 2.120176  | 4.025323  | -7.62144   |
| H | 1.443067  | 3.126353  | -5.360164  | 1.474735  | 3.097145  | -5.367627  | 1.589376  | 3.035561  | -5.359938  |
| H | 4.775183  | -1.676108 | -9.006705  | 4.771568  | -1.668872 | -9.006328  | 4.494289  | -2.161303 | -8.778831  |
| H | 2.783518  | -0.172962 | -8.848416  | 2.778269  | -0.164711 | -8.859681  | 2.666788  | -0.458542 | -8.706166  |
| H | 2.720597  | -3.873005 | -12.108565 | 2.723353  | -3.881521 | -12.101282 | 2.39159   | -4.122191 | -12.006569 |
| H | -2.420857 | -0.568501 | -12.085703 | -2.416212 | -0.573237 | -12.10505  | -2.359799 | -0.258612 | -12.210625 |
| H | -2.94185  | -2.199061 | -13.909035 | -2.936767 | -2.215081 | -13.919503 | -2.959205 | -1.799159 | -14.083594 |
| H | 0.964267  | -3.943141 | -13.301181 | 0.966568  | -3.959546 | -13.294574 | 0.684127  | -3.990884 | -13.303905 |
| H | -4.775183 | 1.676108  | -9.006705  | -4.771568 | 1.668872  | -9.006328  | -4.494289 | 2.161303  | -8.778831  |
| H | -2.783518 | 0.172962  | -8.848416  | -2.778269 | 0.164711  | -8.859681  | -2.666788 | 0.458542  | -8.706166  |
| H | -2.720597 | 3.873005  | -12.108565 | -2.723353 | 3.881521  | -12.101282 | -2.39159  | 4.122191  | -12.006569 |
| H | 2.420857  | 0.568501  | -12.085703 | 2.416212  | 0.573237  | -12.10505  | 2.359799  | 0.258612  | -12.210625 |
| H | 2.94185   | 2.199061  | -13.909035 | 2.936767  | 2.215081  | -13.919503 | 2.959205  | 1.799159  | -14.083594 |
| H | -0.964267 | 3.943141  | -13.301181 | -0.966568 | 3.959546  | -13.294574 | -0.684127 | 3.990884  | -13.303905 |
| H | -4.377391 | 2.596619  | 3.846802   | -4.383091 | 2.458471  | 3.634129   | -4.363324 | 2.594818  | 3.829823   |
| H | -1.960337 | 2.069434  | 3.624015   | -1.961036 | 1.939871  | 3.460368   | -1.936792 | 2.085235  | 3.652145   |
| H | 1.034086  | -2.311723 | 6.87449    | 1.035132  | -2.233376 | 6.986944   | 1.020198  | -2.29808  | 6.92381    |
| H | 0.048687  | -3.605323 | 8.753873   | 0.043717  | -3.417596 | 8.933882   | 0.01252   | -3.603841 | 8.784004   |
| H | 4.377391  | -2.596619 | 3.846802   | 4.383091  | -2.458471 | 3.634129   | 4.363324  | -2.594818 | 3.829823   |
| H | 1.960337  | -2.069434 | 3.624015   | 1.961036  | -1.939871 | 3.460368   | 1.936792  | -2.085235 | 3.652145   |
| H | -1.034086 | 2.311723  | 6.87449    | -1.035132 | 2.233376  | 6.986944   | -1.020198 | 2.29808   | 6.92381    |
| H | -0.048687 | 3.605323  | 8.753873   | -0.043717 | 3.417596  | 8.933882   | -0.01252  | 3.603841  | 8.784004   |
| H | 1.433556  | 3.140136  | 0.132721   | 1.506331  | 3.081316  | 0.14069    | 1.482021  | 3.099838  | 0.151441   |
| H | 1.890059  | 4.133042  | 2.412915   | 2.013165  | 4.077064  | 2.404517   | 1.947544  | 4.102541  | 2.424116   |
| H | 1.280519  | 2.835065  | 4.456097   | 1.385913  | 2.807128  | 4.466257   | 1.315194  | 2.829333  | 4.479009   |
| H | -1.433556 | -3.140136 | 0.132721   | -1.506331 | -3.081316 | 0.14069    | -1.482021 | -3.099838 | 0.151441   |
| H | -1.890059 | -4.133042 | 2.412915   | -2.013165 | -4.077064 | 2.404517   | -1.947544 | -4.102541 | 2.424116   |
| H | -1.280519 | -2.835065 | 4.456097   | -1.385913 | -2.807128 | 4.466257   | -1.315194 | -2.829333 | 4.479009   |
| H | 4.737184  | -3.566757 | -10.677697 | 4.737336  | -3.567626 | -10.668173 | 4.348968  | -4.025001 | -10.469134 |

|   |           |           |            |            |           |            |            |           |            |
|---|-----------|-----------|------------|------------|-----------|------------|------------|-----------|------------|
| H | -4.737184 | 3.566757  | -10.677697 | -4.737336  | 3.567626  | -10.668173 | -4.348968  | 4.025001  | -10.469134 |
| H | -1.20585  | -3.923883 | -14.525157 | -1.201818  | -3.945907 | -14.521882 | -1.404817  | -3.705946 | -14.630618 |
| H | 1.20585   | 3.923883  | -14.525157 | 1.201818   | 3.945907  | -14.521882 | 1.404817   | 3.705946  | -14.630618 |
| H | -5.800267 | -0.354417 | 7.514238   | -5.804846  | -0.246624 | 7.49191    | -5.836752  | -0.389143 | 7.452167   |
| H | -4.603365 | -2.015221 | 8.846651   | -4.60974   | -1.823947 | 8.924409   | -4.652595  | -2.046464 | 8.800165   |
| H | 4.603365  | 2.015221  | 8.846651   | 4.60974    | 1.823947  | 8.924409   | 4.652595   | 2.046464  | 8.800165   |
| H | 5.800267  | 0.354417  | 7.514238   | 5.804846   | 0.246624  | 7.49191    | 5.836752   | 0.389143  | 7.452167   |
| H | -3.279642 | -1.71497  | 10.769593  | -3.285706  | -1.401745 | 10.823168  | -3.364809  | -1.744003 | 10.747114  |
| H | -1.69501  | -5.354459 | 9.059147   | -1.698068  | -5.141509 | 9.341132   | -1.723278  | -5.366477 | 9.054924   |
| H | -4.116535 | -2.997384 | 12.722173  | -4.125181  | -2.562116 | 12.848733  | -4.225659  | -3.038036 | 12.681647  |
| H | -2.519867 | -6.635147 | 11.024585  | -2.530435  | -6.29863  | 11.378463  | -2.571594  | -6.65877  | 11.002714  |
| H | -3.742181 | -5.462659 | 12.86      | -3.754143  | -5.014543 | 13.135775  | -3.834465  | -5.500779 | 12.819865  |
| H | -6.855039 | -0.579085 | 5.424669   | -6.828253  | -0.633087 | 5.424809   | -6.835744  | -0.62095  | 5.328748   |
| H | -5.862363 | 3.625896  | 5.556196   | -5.892298  | 3.586074  | 5.238208   | -5.907368  | 3.596298  | 5.512842   |
| H | -9.269174 | -0.01057  | 5.492864   | -9.249097  | -0.093692 | 5.430926   | -9.259103  | -0.088063 | 5.345029   |
| H | -8.282548 | 4.193939  | 5.606556   | -8.319715  | 4.121072  | 5.232885   | -8.33626   | 4.129191  | 5.511048   |
| H | -9.995984 | 2.376806  | 5.584032   | -10.006948 | 2.28332   | 5.337732   | -10.022384 | 2.288148  | 5.436363   |
| H | 3.279642  | 1.71497   | 10.769593  | 3.285706   | 1.401745  | 10.823168  | 3.364809   | 1.744003  | 10.747114  |
| H | 1.69501   | 5.354459  | 9.059147   | 1.698068   | 5.141509  | 9.341132   | 1.723278   | 5.366477  | 9.054924   |
| H | 4.116535  | 2.997384  | 12.722173  | 4.125181   | 2.562116  | 12.848733  | 4.225659   | 3.038036  | 12.681647  |
| H | 2.519867  | 6.635147  | 11.024585  | 2.530435   | 6.29863   | 11.378463  | 2.571594   | 6.65877   | 11.002714  |
| H | 3.742181  | 5.462659  | 12.86      | 3.754143   | 5.014543  | 13.135775  | 3.834465   | 5.500779  | 12.819865  |
| H | 6.855039  | 0.579085  | 5.424669   | 6.828253   | 0.633087  | 5.424809   | 6.835744   | 0.62095   | 5.328748   |
| H | 5.862363  | -3.625896 | 5.556196   | 5.892298   | -3.586074 | 5.238208   | 5.907368   | -3.596298 | 5.512842   |
| H | 9.269174  | 0.01057   | 5.492864   | 9.249097   | 0.093692  | 5.430926   | 9.259103   | 0.088063  | 5.345029   |
| H | 8.282548  | -4.193939 | 5.606556   | 8.319715   | -4.121072 | 5.232885   | 8.33626    | -4.129191 | 5.511048   |
| H | 9.995984  | -2.376806 | 5.584032   | 10.006948  | -2.28332  | 5.337732   | 10.022384  | -2.288148 | 5.436363   |



| <b>RuOs7</b> |           | S0        |            |           | S1        |            |           | T1        |            |  |
|--------------|-----------|-----------|------------|-----------|-----------|------------|-----------|-----------|------------|--|
| Atom         | X         | Y         | Z          | X         | Y         | Z          | X         | Y         | Z          |  |
| Os           | 0         | 0         | 5.621328   | 0         | 0         | 5.646895   | 0         | 0         | 5.657973   |  |
| Ru           | 0         | 0         | -9.595162  | 0         | 0         | -9.589351  | 0         | 0         | -9.591383  |  |
| N            | -0.638503 | -1.265324 | -3.158868  | -0.73214  | -1.214267 | -3.135679  | -0.746248 | -1.212344 | -3.135985  |  |
| N            | 0.638503  | 1.265324  | -3.158868  | 0.73214   | 1.214267  | -3.135679  | 0.746248  | 1.212344  | -3.135985  |  |
| N            | -0.625616 | -1.175284 | -7.998901  | -0.725207 | -1.121639 | -7.995319  | -0.731223 | -1.118626 | -7.997972  |  |
| N            | 0.625616  | 1.175284  | -7.998901  | 0.725207  | 1.121639  | -7.995319  | 0.731223  | 1.118626  | -7.997972  |  |
| N            | 1.670658  | -1.22178  | -9.699105  | 1.560217  | -1.358747 | -9.682681  | 1.555549  | -1.363653 | -9.683716  |  |
| N            | -0.565769 | -1.318927 | -11.083234 | -0.671986 | -1.272699 | -11.074026 | -0.676098 | -1.271656 | -11.075161 |  |
| N            | -1.670658 | 1.22178   | -9.699105  | -1.560217 | 1.358747  | -9.682681  | -1.555549 | 1.363653  | -9.683716  |  |
| N            | 0.565769  | 1.318927  | -11.083234 | 0.671986  | 1.272699  | -11.074026 | 0.676098  | 1.271656  | -11.075161 |  |
| N            | -1.963806 | 0.616749  | 5.73618    | -1.968688 | 0.604976  | 5.703369   | -1.97506  | 0.602642  | 5.717444   |  |
| N            | -0.734307 | -1.211704 | 7.116051   | -0.744528 | -1.170316 | 7.172659   | -0.748088 | -1.17175  | 7.180252   |  |
| N            | 1.963806  | -0.616749 | 5.73618    | 1.968688  | -0.604976 | 5.703369   | 1.97506   | -0.602642 | 5.717444   |  |
| N            | 0.734307  | 1.211704  | 7.116051   | 0.744528  | 1.170316  | 7.172659   | 0.748088  | 1.17175   | 7.180252   |  |
| N            | -0.639224 | -1.264908 | -0.813158  | -0.716824 | -1.233662 | -0.793138  | -0.731538 | -1.225919 | -0.795153  |  |
| N            | 0.639224  | 1.264908  | -0.813158  | 0.716824  | 1.233662  | -0.793138  | 0.731538  | 1.225919  | -0.795153  |  |
| N            | 0.576877  | 1.179241  | 4.033886   | 0.629143  | 1.17759   | 4.07096    | 0.64465   | 1.161497  | 4.064765   |  |
| N            | -0.576877 | -1.179241 | 4.033886   | -0.629143 | -1.17759  | 4.07096    | -0.64465  | -1.161497 | 4.064765   |  |
| C            | 0.327713  | 0.649718  | -4.301929  | 0.372055  | 0.608728  | -4.298296  | 0.376629  | 0.605061  | -4.299143  |  |
| C            | -0.327713 | -0.649718 | -4.301929  | -0.372055 | -0.608728 | -4.298296  | -0.376629 | -0.605061 | -4.299143  |  |
| C            | -0.658763 | -1.296918 | -5.573074  | -0.761264 | -1.224892 | -5.560535  | -0.768204 | -1.217107 | -5.56089   |  |
| C            | -0.33366  | -0.644324 | -6.772644  | -0.385497 | -0.609987 | -6.769114  | -0.388543 | -0.606805 | -6.77197   |  |
| C            | 0.33366   | 0.644324  | -6.772644  | 0.385497  | 0.609987  | -6.769114  | 0.388543  | 0.606805  | -6.77197   |  |
| C            | 0.658763  | 1.296918  | -5.573074  | 0.761264  | 1.224892  | -5.560535  | 0.768204  | 1.217107  | -5.56089   |  |
| C            | -1.301403 | -2.550917 | -5.643647  | -1.51206  | -2.422202 | -5.632112  | -1.527219 | -2.410538 | -5.63328   |  |
| C            | -1.588678 | -3.091792 | -6.900081  | -1.847145 | -2.93978  | -6.883755  | -1.865049 | -2.927436 | -6.884028  |  |
| C            | -1.238354 | -2.377857 | -8.062208  | -1.437561 | -2.263911 | -8.053697  | -1.450585 | -2.255888 | -8.055531  |  |
| C            | 1.238354  | 2.377857  | -8.062208  | 1.437561  | 2.263911  | -8.053697  | 1.450585  | 2.255888  | -8.055531  |  |
| C            | 1.588678  | 3.091792  | -6.900081  | 1.847145  | 2.93978   | -6.883755  | 1.865049  | 2.927436  | -6.884028  |  |
| C            | 1.301403  | 2.550917  | -5.643647  | 1.51206   | 2.422202  | -5.632112  | 1.527219  | 2.410538  | -5.63328   |  |
| C            | 3.798972  | -3.013488 | -9.959709  | 3.518602  | -3.338968 | -9.909669  | 3.507805  | -3.350243 | -9.908758  |  |
| C            | 3.856783  | -1.969334 | -9.020581  | 3.668966  | -2.289719 | -8.986471  | 3.661314  | -2.30061  | -8.986473  |  |
| C            | 2.771047  | -1.092395 | -8.917365  | 2.666684  | -1.31677  | -8.899676  | 2.662088  | -1.324446 | -8.900609  |  |
| C            | 1.603187  | -2.234686 | -10.617752 | 1.402423  | -2.376235 | -10.584957 | 1.394574  | -2.381608 | -10.584902 |  |
| C            | 2.658868  | -3.145994 | -10.765517 | 2.372243  | -3.380912 | -10.716236 | 2.361326  | -3.389397 | -10.71527  |  |
| C            | 0.357404  | -2.276283 | -11.409182 | 0.159644  | -2.316431 | -11.380111 | 0.151838  | -2.31874  | -11.379845 |  |
| C            | -1.746703 | -1.266171 | -11.747656 | -1.837566 | -1.118554 | -11.749925 | -1.841318 | -1.114654 | -11.75108  |  |
| C            | -2.060154 | -2.17184  | -12.767323 | -2.227613 | -2.005606 | -12.759606 | -2.234679 | -2.001939 | -12.759255 |  |
| C            | 0.101115  | -3.209131 | -12.424411 | -0.177167 | -3.237276 | -12.382954 | -0.188412 | -3.240052 | -12.38116  |  |
| C            | -1.120311 | -3.15851  | -13.111756 | -1.383732 | -3.082877 | -13.080684 | -1.394597 | -3.082671 | -13.078835 |  |
| C            | -3.798972 | 3.013488  | -9.959709  | -3.518602 | 3.338968  | -9.909669  | -3.507805 | 3.350243  | -9.908758  |  |
| C            | -3.856783 | 1.969334  | -9.020581  | -3.668966 | 2.289719  | -8.986471  | -3.661314 | 2.30061   | -8.986473  |  |
| C            | -2.771047 | 1.092395  | -8.917365  | -2.666684 | 1.31677   | -8.899676  | -2.662088 | 1.324446  | -8.900609  |  |
| C            | -1.603187 | 2.234686  | -10.617752 | -1.402423 | 2.376235  | -10.584957 | -1.394574 | 2.381608  | -10.584902 |  |
| C            | -2.658868 | 3.145994  | -10.765517 | -2.372243 | 3.380912  | -10.716236 | -2.361326 | 3.389397  | -10.71527  |  |
| C            | -0.357404 | 2.276283  | -11.409182 | -0.159644 | 2.316431  | -11.380111 | -0.151838 | 2.31874   | -11.379845 |  |
| C            | 1.746703  | 1.266171  | -11.747656 | 1.837566  | 1.118554  | -11.749925 | 1.841318  | 1.114654  | -11.75108  |  |

|   |           |           |            |           |           |            |           |           |            |
|---|-----------|-----------|------------|-----------|-----------|------------|-----------|-----------|------------|
| C | 2.060154  | 2.17184   | -12.767323 | 2.227613  | 2.005606  | -12.759606 | 2.234679  | 2.001939  | -12.759255 |
| C | -0.101115 | 3.209131  | -12.424411 | 0.177167  | 3.237276  | -12.382954 | 0.188412  | 3.240052  | -12.38116  |
| C | 1.120311  | 3.15851   | -13.111756 | 1.383732  | 3.082877  | -13.080684 | 1.394597  | 3.082671  | -13.078835 |
| C | -4.695941 | 1.313575  | 6.008448   | -4.707581 | 1.257288  | 5.872071   | -4.717464 | 1.240667  | 5.875121   |
| C | -3.867244 | 1.930381  | 5.049344   | -3.86596  | 1.854052  | 4.912261   | -3.8728   | 1.849337  | 4.924963   |
| C | -2.523838 | 1.562769  | 4.93923    | -2.515403 | 1.504753  | 4.848537   | -2.520502 | 1.50769   | 4.866611   |
| C | -2.751697 | -0.00513  | 6.674513   | -2.766896 | -0.002121 | 6.643058   | -2.77508  | -0.015318 | 6.647783   |
| C | -4.10045  | 0.328003  | 6.822165   | -4.121618 | 0.309523  | 6.740292   | -4.132028 | 0.289633  | 6.739569   |
| C | -2.048338 | -1.025998 | 7.472443   | -2.07092  | -0.996452 | 7.482463   | -2.077455 | -1.007762 | 7.48557    |
| C | 0         | -2.131876 | 7.792225   | 0         | -2.037374 | 7.901136   | 0         | -2.040264 | 7.905836   |
| C | -0.537079 | -2.896751 | 8.830943   | -0.549833 | -2.780768 | 8.947893   | -0.549405 | -2.793141 | 8.944792   |
| C | -2.629217 | -1.764942 | 8.50597    | -2.662811 | -1.711416 | 8.522507   | -2.66779  | -1.732857 | 8.519072   |
| C | -1.882071 | -2.726395 | 9.216815   | -1.910051 | -2.631906 | 9.284166   | -1.912146 | -2.653963 | 9.277348   |
| C | 4.695941  | -1.313575 | 6.008448   | 4.707581  | -1.257288 | 5.872071   | 4.717464  | -1.240667 | 5.875121   |
| C | 3.867244  | -1.930381 | 5.049344   | 3.86596   | -1.854052 | 4.912261   | 3.8728    | -1.849337 | 4.924963   |
| C | 2.523838  | -1.562769 | 4.93923    | 2.515403  | -1.504753 | 4.848537   | 2.520502  | -1.50769  | 4.866611   |
| C | 2.751697  | 0.00513   | 6.674513   | 2.766896  | 0.002121  | 6.643058   | 2.77508   | 0.015318  | 6.647783   |
| C | 4.10045   | -0.328003 | 6.822165   | 4.121618  | -0.309523 | 6.740292   | 4.132028  | -0.289633 | 6.739569   |
| C | 2.048338  | 1.025998  | 7.472443   | 2.07092   | 0.996452  | 7.482463   | 2.077455  | 1.007762  | 7.48557    |
| C | 0         | 2.131876  | 7.792225   | 0         | 2.037374  | 7.901136   | 0         | 2.040264  | 7.905836   |
| C | 0.537079  | 2.896751  | 8.830943   | 0.549833  | 2.780768  | 8.947893   | 0.549405  | 2.793141  | 8.944792   |
| C | 2.629217  | 1.764942  | 8.50597    | 2.662811  | 1.711416  | 8.522507   | 2.66779   | 1.732857  | 8.519072   |
| C | 1.882071  | 2.726395  | 9.216815   | 1.910051  | 2.631906  | 9.284166   | 1.912146  | 2.653963  | 9.277348   |
| C | -0.324535 | -0.642449 | -1.986184  | -0.372036 | -0.627573 | -1.971182  | -0.380451 | -0.627188 | -1.967008  |
| C | 0.324535  | 0.642449  | -1.986184  | 0.372036  | 0.627573  | -1.971182  | 0.380451  | 0.627188  | -1.967008  |
| C | 0.328893  | 0.650166  | 0.330234   | 0.359443  | 0.628603  | 0.359782   | 0.362723  | 0.615025  | 0.364575   |
| C | -0.328893 | -0.650166 | 0.330234   | -0.359443 | -0.628603 | 0.359782   | -0.362723 | -0.615025 | 0.364575   |
| C | 0.655934  | 1.302167  | 1.60062    | 0.70236   | 1.255512  | 1.624343   | 0.720645  | 1.243645  | 1.62588    |
| C | 0.322565  | 0.646241  | 2.79539    | 0.337281  | 0.624339  | 2.837983   | 0.351343  | 0.623796  | 2.83352    |
| C | -0.322565 | -0.646241 | 2.79539    | -0.337281 | -0.624339 | 2.837983   | -0.351343 | -0.623796 | 2.83352    |
| C | -0.655934 | -1.302167 | 1.60062    | -0.70236  | -1.255512 | 1.624343   | -0.720645 | -1.243645 | 1.62588    |
| C | 1.289616  | 2.558181  | 1.678078   | 1.393479  | 2.484254  | 1.710549   | 1.430519  | 2.466892  | 1.711547   |
| C | 1.560418  | 3.094429  | 2.942821   | 1.696658  | 3.025468  | 2.963886   | 1.736122  | 2.997344  | 2.965536   |
| C | 1.195218  | 2.385564  | 4.100117   | 1.303749  | 2.340588  | 4.133023   | 1.334082  | 2.318633  | 4.135244   |
| C | -1.289616 | -2.558181 | 1.678078   | -1.393479 | -2.484254 | 1.710549   | -1.430519 | -2.466892 | 1.711547   |
| C | -1.560418 | -3.094429 | 2.942821   | -1.696658 | -3.025468 | 2.963886   | -1.736122 | -2.997344 | 2.965536   |
| C | -1.195218 | -2.385564 | 4.100117   | -1.303749 | -2.340588 | 4.133023   | -1.334082 | -2.318633 | 4.135244   |
| C | -6.172477 | 1.663546  | 6.190263   | -6.194105 | 1.582003  | 5.99609    | -6.206235 | 1.55748   | 5.992677   |
| C | -7.023747 | 0.395155  | 5.949397   | -7.007469 | 0.286975  | 5.760862   | -7.012205 | 0.260112  | 5.745253   |
| C | -6.397662 | 2.163038  | 7.636371   | -6.474174 | 2.113037  | 7.421633   | -6.496672 | 2.078534  | 7.419857   |
| C | -6.631483 | 2.758405  | 5.213868   | -6.64301  | 2.640466  | 4.976203   | -6.654402 | 2.619922  | 4.976613   |
| C | 6.172477  | -1.663546 | 6.190263   | 6.194105  | -1.582003 | 5.99609    | 6.206235  | -1.55748  | 5.992677   |
| C | 7.023747  | -0.395155 | 5.949397   | 7.007469  | -0.286975 | 5.760862   | 7.012205  | -0.260112 | 5.745253   |
| C | 6.397662  | -2.163038 | 7.636371   | 6.474174  | -2.113037 | 7.421633   | 6.496672  | -2.078534 | 7.419857   |
| C | 6.631483  | -2.758405 | 5.213868   | 6.64301   | -2.640466 | 4.976203   | 6.654402  | -2.619922 | 4.976613   |
| C | -2.536715 | -3.519206 | 10.347684  | -2.578326 | -3.404358 | 10.419212  | -2.579526 | -3.437329 | 10.40504   |
| C | -3.017318 | -2.533066 | 11.437853  | -3.118734 | -2.394078 | 11.458808  | -3.127679 | -2.436429 | 11.449832  |
| C | -3.752337 | -4.293011 | 9.787049   | -3.755189 | -4.225788 | 9.842471   | -3.75098  | -4.260378 | 9.819358   |
| C | -1.564958 | -4.524669 | 10.986024  | -1.602524 | -4.362116 | 11.120985  | -1.601047 | -4.395164 | 11.10292   |

|   |           |           |            |           |           |            |           |           |            |
|---|-----------|-----------|------------|-----------|-----------|------------|-----------|-----------|------------|
| C | 2.536715  | 3.519206  | 10.347684  | 2.578326  | 3.404358  | 10.419212  | 2.579526  | 3.437329  | 10.40504   |
| C | 3.017318  | 2.533066  | 11.437853  | 3.118734  | 2.394078  | 11.458808  | 3.127679  | 2.436429  | 11.449832  |
| C | 3.752337  | 4.293011  | 9.787049   | 3.755189  | 4.225788  | 9.842471   | 3.75098   | 4.260378  | 9.819358   |
| C | 1.564958  | 4.524669  | 10.986024  | 1.602524  | 4.362116  | 11.120985  | 1.601047  | 4.395164  | 11.10292   |
| H | -1.560762 | -3.069283 | -4.726937  | -1.812271 | -2.91201  | -4.712103  | -1.830698 | -2.897027 | -4.712553  |
| H | -2.080313 | -4.052241 | -6.997502  | -2.420855 | -3.854386 | -6.977228  | -2.444644 | -3.838549 | -6.976577  |
| H | -1.456228 | -2.767309 | -9.050448  | -1.690748 | -2.639524 | -9.039118  | -1.705796 | -2.631406 | -9.040557  |
| H | 1.456228  | 2.767309  | -9.050448  | 1.690748  | 2.639524  | -9.039118  | 1.705796  | 2.631406  | -9.040557  |
| H | 2.080313  | 4.052241  | -6.997502  | 2.420855  | 3.854386  | -6.977228  | 2.444644  | 3.838549  | -6.976577  |
| H | 1.560762  | 3.069283  | -4.726937  | 1.812271  | 2.91201   | -4.712103  | 1.830698  | 2.897027  | -4.712553  |
| H | 4.720128  | -1.831985 | -8.380027  | 4.540314  | -2.221502 | -8.345579  | 4.532812  | -2.23458  | -8.345537  |
| H | 2.774998  | -0.269769 | -8.211218  | 2.742371  | -0.486967 | -8.205929  | 2.740009  | -0.494306 | -8.207507  |
| H | 2.597733  | -3.9467   | -11.493366 | 2.240328  | -4.184075 | -11.431902 | 2.226923  | -4.192809 | -11.430203 |
| H | -2.441845 | -0.490698 | -11.447083 | -2.458291 | -0.276011 | -11.466669 | -2.459003 | -0.269465 | -11.468962 |
| H | -3.015485 | -2.099592 | -13.273966 | -3.167637 | -1.850339 | -13.276188 | -3.17431  | -1.844285 | -13.275852 |
| H | 0.837429  | -3.96251  | -12.679099 | 0.486303  | -4.060687 | -12.620671 | 0.472152  | -4.066157 | -12.617681 |
| H | -4.720128 | 1.831985  | -8.380027  | -4.540314 | 2.221502  | -8.345579  | -4.532812 | 2.23458   | -8.345537  |
| H | -2.774998 | 0.269769  | -8.211218  | -2.742371 | 0.486967  | -8.205929  | -2.740009 | 0.494306  | -8.207507  |
| H | -2.597733 | 3.9467    | -11.493366 | -2.240328 | 4.184075  | -11.431902 | -2.226923 | 4.192809  | -11.430203 |
| H | 2.441845  | 0.490698  | -11.447083 | 2.458291  | 0.276011  | -11.466669 | 2.459003  | 0.269465  | -11.468962 |
| H | 3.015485  | 2.099592  | -13.273966 | 3.167637  | 1.850339  | -13.276188 | 3.17431   | 1.844285  | -13.275852 |
| H | -0.837429 | 3.96251   | -12.679099 | -0.486303 | 4.060687  | -12.620671 | -0.472152 | 4.066157  | -12.617681 |
| H | -4.248626 | 2.695534  | 4.383517   | -4.243459 | 2.586052  | 4.208977   | -4.249624 | 2.58478   | 4.224921   |
| H | -1.872518 | 2.033028  | 4.210981   | -1.853299 | 1.954331  | 4.117574   | -1.857004 | 1.967291  | 4.142767   |
| H | -4.6937   | -0.183892 | 7.573628   | -4.730188 | -0.187558 | 7.488623   | -4.741866 | -0.215217 | 7.48172    |
| H | 1.031472  | -2.253486 | 7.481191   | 1.044053  | -2.139626 | 7.627422   | 1.046068  | -2.133986 | 7.636724   |
| H | 0.104399  | -3.615881 | 9.326496   | 0.092573  | -3.465025 | 9.488289   | 0.094977  | -3.477015 | 9.483262   |
| H | -3.669608 | -1.590628 | 8.76234    | -3.712262 | -1.553023 | 8.747765   | -3.719065 | -1.582363 | 8.741204   |
| H | 4.248626  | -2.695534 | 4.383517   | 4.243459  | -2.586052 | 4.208977   | 4.249624  | -2.58478  | 4.224921   |
| H | 1.872518  | -2.033028 | 4.210981   | 1.853299  | -1.954331 | 4.117574   | 1.857004  | -1.967291 | 4.142767   |
| H | 4.6937    | 0.183892  | 7.573628   | 4.730188  | 0.187558  | 7.488623   | 4.741866  | 0.215217  | 7.48172    |
| H | -1.031472 | 2.253486  | 7.481191   | -1.044053 | 2.139626  | 7.627422   | -1.046068 | 2.133986  | 7.636724   |
| H | -0.104399 | 3.615881  | 9.326496   | -0.092573 | 3.465025  | 9.488289   | -0.094977 | 3.477015  | 9.483262   |
| H | 3.669608  | 1.590628  | 8.76234    | 3.712262  | 1.553023  | 8.747765   | 3.719065  | 1.582363  | 8.741204   |
| H | 1.555132  | 3.082854  | 0.766965   | 1.681661  | 2.987885  | 0.793493   | 1.72549   | 2.966492  | 0.795025   |
| H | 2.04879   | 4.05586   | 3.048237   | 2.22842   | 3.964267  | 3.056771   | 2.280734  | 3.928698  | 3.062055   |
| H | 1.385436  | 2.783213  | 5.090637   | 1.521508  | 2.738222  | 5.118597   | 1.554254  | 2.712236  | 5.121341   |
| H | -1.555132 | -3.082854 | 0.766965   | -1.681661 | -2.987885 | 0.793493   | -1.72549  | -2.966492 | 0.795025   |
| H | -2.04879  | -4.05586  | 3.048237   | -2.22842  | -3.964267 | 3.056771   | -2.280734 | -3.928698 | 3.062055   |
| H | -1.385436 | -2.783213 | 5.090637   | -1.521508 | -2.738222 | 5.118597   | -1.554254 | -2.712236 | 5.121341   |
| H | 4.624101  | -3.709887 | -10.063107 | 4.277806  | -4.108366 | -10.000144 | 4.264659  | -4.122046 | -9.998503  |
| H | -4.624101 | 3.709887  | -10.063107 | -4.277806 | 4.108366  | -10.000144 | -4.264659 | 4.122046  | -9.998503  |
| H | -1.333333 | -3.873656 | -13.898944 | -1.658555 | -3.787065 | -13.858573 | -1.672077 | -3.787175 | -13.855502 |
| H | 1.333333  | 3.873656  | -13.898944 | 1.658555  | 3.787065  | -13.858573 | 1.672077  | 3.787175  | -13.855502 |
| H | -6.890948 | 0.021828  | 4.925736   | -6.83277  | -0.109374 | 4.752514   | -6.830341 | -0.129305 | 4.735497   |
| H | -6.761716 | -0.409827 | 6.64809    | -6.753921 | -0.493864 | 6.489188   | -6.75904  | -0.523944 | 6.470238   |
| H | -8.084758 | 0.636555  | 6.095691   | -8.076983 | 0.510405  | 5.86501    | -8.083284 | 0.477969  | 5.845035   |
| H | -5.810328 | 3.068919  | 7.834744   | -5.914182 | 3.036909  | 7.61457    | -5.942551 | 3.004082  | 7.621397   |
| H | -7.460225 | 2.401018  | 7.777038   | -7.545502 | 2.330341  | 7.519779   | -7.569623 | 2.289676  | 7.513481   |

|   |           |           |           |           |           |           |           |           |           |
|---|-----------|-----------|-----------|-----------|-----------|-----------|-----------|-----------|-----------|
| H | -6.121529 | 1.402339  | 8.377898  | -6.208083 | 1.37866   | 8.192489  | -6.230888 | 1.340866  | 8.187676  |
| H | -7.694013 | 2.969603  | 5.388164  | -7.713578 | 2.835425  | 5.114622  | -7.726742 | 2.808574  | 5.109867  |
| H | -6.07464  | 3.693502  | 5.361573  | -6.10889  | 3.590109  | 5.113566  | -6.126115 | 3.571472  | 5.122961  |
| H | -6.519211 | 2.442884  | 4.167875  | -6.496077 | 2.298341  | 3.943097  | -6.49966  | 2.284913  | 3.942308  |
| H | 6.890948  | -0.021828 | 4.925736  | 6.83277   | 0.109374  | 4.752514  | 6.830341  | 0.129305  | 4.735497  |
| H | 6.761716  | 0.409827  | 6.64809   | 6.753921  | 0.493864  | 6.489188  | 6.75904   | 0.523944  | 6.470238  |
| H | 8.084758  | -0.636555 | 6.095691  | 8.076983  | -0.510405 | 5.86501   | 8.083284  | -0.477969 | 5.845035  |
| H | 5.810328  | -3.068919 | 7.834744  | 5.914182  | -3.036909 | 7.61457   | 5.942551  | -3.004082 | 7.621397  |
| H | 7.460225  | -2.401018 | 7.777038  | 7.545502  | -2.330341 | 7.519779  | 7.569623  | -2.289676 | 7.513481  |
| H | 6.121529  | -1.402339 | 8.377898  | 6.208083  | -1.37866  | 8.192489  | 6.230888  | -1.340866 | 8.187676  |
| H | 7.694013  | -2.969603 | 5.388164  | 7.713578  | -2.835425 | 5.114622  | 7.726742  | -2.808574 | 5.109867  |
| H | 6.07464   | -3.693502 | 5.361573  | 6.10889   | -3.590109 | 5.113566  | 6.126115  | -3.571472 | 5.122961  |
| H | 6.519211  | -2.442884 | 4.167875  | 6.496077  | -2.298341 | 3.943097  | 6.49966   | -2.284913 | 3.942308  |
| H | -2.172482 | -1.975298 | 11.862153 | -2.303296 | -1.800066 | 11.890779 | -2.316212 | -1.84238  | 11.889097 |
| H | -3.744396 | -1.811957 | 11.042516 | -3.853122 | -1.707355 | 11.01882  | -3.863287 | -1.749531 | 11.012192 |
| H | -3.50371  | -3.094086 | 12.246661 | -3.614689 | -2.943159 | 12.269493 | -3.624277 | -2.993528 | 12.254609 |
| H | -3.440815 | -5.007118 | 9.013832  | -3.401654 | -4.954514 | 9.101961  | -3.392227 | -4.981628 | 9.07409   |
| H | -4.233693 | -4.851289 | 10.600754 | -4.246166 | -4.771461 | 10.658467 | -4.240502 | -4.814737 | 10.630317 |
| H | -4.501062 | -3.617755 | 9.353305  | -4.50784  | -3.584326 | 9.366591  | -4.506223 | -3.619343 | 9.347088  |
| H | -2.085757 | -5.065753 | 11.786006 | -2.136121 | -4.888906 | 11.921663 | -2.134418 | -4.929887 | 11.898434 |
| H | -1.209147 | -5.26443  | 10.256335 | -1.205507 | -5.117341 | 10.429597 | -1.198596 | -5.14382  | 10.407559 |
| H | -0.695507 | -4.022753 | 11.431398 | -0.761495 | -3.823555 | 11.577691 | -0.763942 | -3.855824 | 11.565811 |
| H | 2.172482  | 1.975298  | 11.862153 | 2.303296  | 1.800066  | 11.890779 | 2.316212  | 1.84238   | 11.889097 |
| H | 3.744396  | 1.811957  | 11.042516 | 3.853122  | 1.707355  | 11.01882  | 3.863287  | 1.749531  | 11.012192 |
| H | 3.50371   | 3.094086  | 12.246661 | 3.614689  | 2.943159  | 12.269493 | 3.624277  | 2.993528  | 12.254609 |
| H | 3.440815  | 5.007118  | 9.013832  | 3.401654  | 4.954514  | 9.101961  | 3.392227  | 4.981628  | 9.07409   |
| H | 4.233693  | 4.851289  | 10.600754 | 4.246166  | 4.771461  | 10.658467 | 4.240502  | 4.814737  | 10.630317 |
| H | 4.501062  | 3.617755  | 9.353305  | 4.50784   | 3.584326  | 9.366591  | 4.506223  | 3.619343  | 9.347088  |
| H | 2.085757  | 5.065753  | 11.786006 | 2.136121  | 4.888906  | 11.921663 | 2.134418  | 4.929887  | 11.898434 |
| H | 1.209147  | 5.26443   | 10.256335 | 1.205507  | 5.117341  | 10.429597 | 1.198596  | 5.14382   | 10.407559 |
| H | 0.695507  | 4.022753  | 11.431398 | 0.761495  | 3.823555  | 11.577691 | 0.763942  | 3.855824  | 11.565811 |

| <b>RuOs8</b> | S0        |           |            | S1        |           |            | T1        |           |            |
|--------------|-----------|-----------|------------|-----------|-----------|------------|-----------|-----------|------------|
| Atom         | X         | Y         | Z          | X         | Y         | Z          | X         | Y         | Z          |
| Os           | 0         | 0         | 7.363789   | 0         | 0         | 7.343743   | 0         | 0         | 7.391924   |
| Ru           | 0         | 0         | -7.850853  | 0         | 0         | -7.885061  | 0         | 0         | -7.845509  |
| N            | 0         | 1.417191  | -1.416657  | 0.010813  | 1.417567  | -1.433588  | 0.023963  | 1.427448  | -1.404691  |
| N            | 0         | -1.417191 | -1.416657  | -0.010813 | -1.417567 | -1.433588  | -0.023963 | -1.427448 | -1.404691  |
| N            | 0.061173  | 1.33008   | -6.25626   | 0.049474  | 1.334718  | -6.293027  | 0.09362   | 1.336348  | -6.260389  |
| N            | -0.061173 | -1.33008  | -6.25626   | -0.049474 | -1.334718 | -6.293027  | -0.09362  | -1.336348 | -6.260389  |
| N            | -2.04086  | 0.348997  | -7.955452  | -2.044293 | 0.320186  | -7.982352  | -2.008792 | 0.490132  | -7.909691  |
| N            | -0.058758 | 1.435895  | -9.339273  | -0.083397 | 1.438449  | -9.369998  | 0.013333  | 1.400218  | -9.366162  |
| N            | 2.04086   | -0.348997 | -7.955452  | 2.044293  | -0.320186 | -7.982352  | 2.008792  | -0.490132 | -7.909691  |
| N            | 0.058758  | -1.435895 | -9.339273  | 0.083397  | -1.438449 | -9.369998  | -0.013333 | -1.400218 | -9.366162  |
| N            | 2.017011  | 0.414329  | 7.476126   | 2.017829  | 0.400668  | 7.40827    | 2.017508  | 0.403585  | 7.491575   |
| N            | 0.024878  | 1.425041  | 8.851336   | 0.067203  | 1.382113  | 8.887402   | 0.039795  | 1.429983  | 8.871651   |
| N            | -2.017011 | -0.414329 | 7.476126   | -2.017829 | -0.400668 | 7.40827    | -2.017508 | -0.403585 | 7.491575   |
| N            | -0.024878 | -1.425041 | 8.851336   | -0.067203 | -1.382113 | 8.887402   | -0.039795 | -1.429983 | 8.871651   |
| N            | -0.032493 | 1.416805  | 0.928921   | -0.012116 | 1.426524  | 0.909069   | -0.023223 | 1.423209  | 0.935871   |
| N            | 0.032493  | -1.416805 | 0.928921   | 0.012116  | -1.426524 | 0.909069   | 0.023223  | -1.423209 | 0.935871   |
| N            | 0.091545  | -1.311763 | 5.774669   | 0.057133  | -1.332513 | 5.774565   | 0.086047  | -1.31849  | 5.803261   |
| N            | -0.091545 | 1.311763  | 5.774669   | -0.057133 | 1.332513  | 5.774565   | -0.086047 | 1.31849   | 5.803261   |
| C            | -0.007438 | -0.727621 | -2.559632  | -0.009804 | -0.713465 | -2.596061  | -0.020851 | -0.713373 | -2.564201  |
| C            | 0.007438  | 0.727621  | -2.559632  | 0.009804  | 0.713465  | -2.596061  | 0.020851  | 0.713373  | -2.564201  |
| C            | 0.032996  | 1.454186  | -3.830737  | 0.030465  | 1.442013  | -3.858558  | 0.062593  | 1.434366  | -3.825973  |
| C            | 0.024492  | 0.725224  | -5.030265  | 0.020383  | 0.721364  | -5.066966  | 0.04297   | 0.71588   | -5.036176  |
| C            | -0.024492 | -0.725224 | -5.030265  | -0.020383 | -0.721364 | -5.066966  | -0.04297  | -0.71588  | -5.036176  |
| C            | -0.032996 | -1.454186 | -3.830737  | -0.030465 | -1.442013 | -3.858558  | -0.062593 | -1.434366 | -3.825973  |
| C            | 0.073089  | 2.862622  | -3.901051  | 0.065704  | 2.854686  | -3.930315  | 0.127922  | 2.848003  | -3.907181  |
| C            | 0.103776  | 3.4746    | -5.157353  | 0.088972  | 3.470904  | -5.182017  | 0.167242  | 3.46608   | -5.156963  |
| C            | 0.096942  | 2.679329  | -6.319393  | 0.079692  | 2.680601  | -6.351727  | 0.144631  | 2.680048  | -6.329531  |
| C            | -0.096942 | -2.679329 | -6.319393  | -0.079692 | -2.680601 | -6.351727  | -0.144631 | -2.680048 | -6.329531  |
| C            | -0.103776 | -3.4746   | -5.157353  | -0.088972 | -3.470904 | -5.182017  | -0.167242 | -3.46608  | -5.156963  |
| C            | -0.073089 | -2.862622 | -3.901051  | -0.065704 | -2.854686 | -3.930315  | -0.127922 | -2.848003 | -3.907181  |
| C            | -4.750149 | 1.14197   | -8.249331  | -4.764527 | 1.081946  | -8.255998  | -4.651357 | 1.468759  | -8.15228   |
| C            | -4.359413 | 0.143539  | -7.350473  | -4.356492 | 0.083438  | -7.364875  | -4.305267 | 0.479456  | -7.222837  |
| C            | -3.006523 | -0.230086 | -7.222532  | -2.998355 | -0.274396 | -7.24663   | -2.982493 | 0.013056  | -7.114817  |
| C            | -2.396909 | 1.310424  | -8.873568  | -2.417272 | 1.282405  | -8.892673  | -2.316595 | 1.444684  | -8.852821  |
| C            | -3.732072 | 1.734599  | -9.067406  | -3.758574 | 1.691521  | -9.076461  | -3.620783 | 1.957707  | -9.024579  |
| C            | -1.326219 | 1.872654  | -9.649672  | -1.357536 | 1.862089  | -9.671051  | -1.230285 | 1.909607  | -9.663452  |
| C            | 0.982603  | 1.944278  | -10.018924 | 0.947893  | 1.962584  | -10.053097 | 1.077545  | 1.798451  | -10.084774 |
| C            | 0.804482  | 2.889466  | -11.048753 | 0.752851  | 2.911255  | -11.076772 | 0.940367  | 2.718546  | -11.139696 |
| C            | -1.587214 | 2.824048  | -10.663205 | -1.635596 | 2.815818  | -10.67792  | -1.446656 | 2.838525  | -10.704713 |
| C            | -0.472646 | 3.333993  | -11.408039 | -0.531493 | 3.343049  | -11.426011 | -0.312526 | 3.23931   | -11.489031 |
| C            | 4.750149  | -1.14197  | -8.249331  | 4.764527  | -1.081946 | -8.255998  | 4.651357  | -1.468759 | -8.15228   |
| C            | 4.359413  | -0.143539 | -7.350473  | 4.356492  | -0.083438 | -7.364875  | 4.305267  | -0.479456 | -7.222837  |
| C            | 3.006523  | 0.230086  | -7.222532  | 2.998355  | 0.274396  | -7.24663   | 2.982493  | -0.013056 | -7.114817  |
| C            | 2.396909  | -1.310424 | -8.873568  | 2.417272  | -1.282405 | -8.892673  | 2.316595  | -1.444684 | -8.852821  |
| C            | 3.732072  | -1.734599 | -9.067406  | 3.758574  | -1.691521 | -9.076461  | 3.620783  | -1.957707 | -9.024579  |
| C            | 1.326219  | -1.872654 | -9.649672  | 1.357536  | -1.862089 | -9.671051  | 1.230285  | -1.909607 | -9.663452  |
| C            | -0.982603 | -1.944278 | -10.018924 | -0.947893 | -1.962584 | -10.053097 | -1.077545 | -1.798451 | -10.084774 |

|   |           |           |            |           |           |            |           |           |            |
|---|-----------|-----------|------------|-----------|-----------|------------|-----------|-----------|------------|
| C | -0.804482 | -2.889466 | -11.048753 | -0.752851 | -2.911255 | -11.076772 | -0.940367 | -2.718546 | -11.139696 |
| C | 1.587214  | -2.824048 | -10.663205 | 1.635596  | -2.815818 | -10.67792  | 1.446656  | -2.838525 | -10.704713 |
| C | 0.472646  | -3.333993 | -11.408039 | 0.531493  | -3.343049 | -11.426011 | 0.312526  | -3.23931  | -11.489031 |
| C | 4.71535   | 1.26756   | 7.779578   | 4.721558  | 1.212736  | 7.67132    | 4.7194    | 1.259603  | 7.75872    |
| C | 4.341536  | 0.27502   | 6.865077   | 4.309801  | 0.287171  | 6.702892   | 4.336425  | 0.254715  | 6.861364   |
| C | 3.000283  | -0.129124 | 6.731018   | 2.962305  | -0.093869 | 6.583924   | 2.993826  | -0.150575 | 6.744772   |
| C | 2.360932  | 1.373617  | 8.406283   | 2.394152  | 1.296747  | 8.38762    | 2.371031  | 1.375337  | 8.40523    |
| C | 3.685162  | 1.824951  | 8.605142   | 3.726181  | 1.724029  | 8.570647   | 3.697281  | 1.828561  | 8.586017   |
| C | 1.277731  | 1.897703  | 9.183273   | 1.338379  | 1.801756  | 9.212688   | 1.295192  | 1.908543  | 9.185952   |
| C | -1.035791 | 1.903627  | 9.531812   | -0.969964 | 1.829418  | 9.616689   | -1.014182 | 1.912863  | 9.560114   |
| C | -0.887573 | 2.841346  | 10.570381  | -0.778178 | 2.695748  | 10.709606  | -0.856426 | 2.861068  | 10.587569  |
| C | 1.506006  | 2.844079  | 10.207658  | 1.610403  | 2.674493  | 10.288231  | 1.532752  | 2.865885  | 10.198142  |
| C | -4.71535  | -1.26756  | 7.779578   | -4.721558 | -1.212736 | 7.67132    | -4.7194   | -1.259603 | 7.75872    |
| C | -4.341536 | -0.27502  | 6.865077   | -4.309801 | -0.287171 | 6.702892   | -4.336425 | -0.254715 | 6.861364   |
| C | -3.000283 | 0.129124  | 6.731018   | -2.962305 | 0.093869  | 6.583924   | -2.993826 | 0.150575  | 6.744772   |
| C | -2.360932 | -1.373617 | 8.406283   | -2.394152 | -1.296747 | 8.38762    | -2.371031 | -1.375337 | 8.40523    |
| C | -3.685162 | -1.824951 | 8.605142   | -3.726181 | -1.724029 | 8.570647   | -3.697281 | -1.828561 | 8.586017   |
| C | -1.277731 | -1.897703 | 9.183273   | -1.338379 | -1.801756 | 9.212688   | -1.295192 | -1.908543 | 9.185952   |
| C | 1.035791  | -1.903627 | 9.531812   | 0.969964  | -1.829418 | 9.616689   | 1.014182  | -1.912863 | 9.560114   |
| C | 0.887573  | -2.841346 | 10.570381  | 0.778178  | -2.695748 | 10.709606  | 0.856426  | -2.861068 | 10.587569  |
| C | -1.506006 | -2.844079 | 10.207658  | -1.610403 | -2.674493 | 10.288231  | -1.532752 | -2.865885 | 10.198142  |
| C | -0.374131 | -3.31716  | 10.948513  | -0.502819 | -3.114725 | 11.087553  | -0.408313 | -3.344518 | 10.946208  |
| C | -0.008358 | 0.719622  | -0.243955  | 0         | 0.729207  | -0.269117  | 0         | 0.733446  | -0.23304   |
| C | 0.008358  | -0.719622 | -0.243955  | 0         | -0.729207 | -0.269117  | 0         | -0.733446 | -0.23304   |
| C | 0.024027  | -0.727843 | 2.07209    | 0.01136   | -0.72442  | 2.061803   | 0.020358  | -0.712758 | 2.099252   |
| C | -0.024027 | 0.727843  | 2.07209    | -0.01136  | 0.72442   | 2.061803   | -0.020358 | 0.712758  | 2.099252   |
| C | 0.065848  | -1.455725 | 3.34255    | 0.035809  | -1.438605 | 3.326511   | 0.060023  | -1.440282 | 3.360359   |
| C | 0.040726  | -0.72135  | 4.537607   | 0.027514  | -0.708287 | 4.539931   | 0.037512  | -0.716952 | 4.567176   |
| C | -0.040726 | 0.72135   | 4.537607   | -0.027514 | 0.708287  | 4.539931   | -0.037512 | 0.716952  | 4.567176   |
| C | -0.065848 | 1.455725  | 3.34255    | -0.035809 | 1.438605  | 3.326511   | -0.060023 | 1.440282  | 3.360359   |
| C | 0.135629  | -2.86108  | 3.418941   | 0.069403  | -2.84737  | 3.41394    | 0.125916  | -2.851561 | 3.438883   |
| C | 0.17811   | -3.462045 | 4.682332   | 0.085536  | -3.467218 | 4.668391   | 0.167324  | -3.458141 | 4.695873   |
| C | 0.155014  | -2.665351 | 5.840184   | 0.072867  | -2.67775  | 5.836785   | 0.145881  | -2.667415 | 5.863575   |
| C | -0.135629 | 2.86108   | 3.418941   | -0.069403 | 2.84737   | 3.41394    | -0.125916 | 2.851561  | 3.438883   |
| C | -0.17811  | 3.462045  | 4.682332   | -0.085536 | 3.467218  | 4.668391   | -0.167324 | 3.458141  | 4.695873   |
| C | -0.155014 | 2.665351  | 5.840184   | -0.072867 | 2.67775   | 5.836785   | -0.145881 | 2.667415  | 5.863575   |
| C | 3.902778  | 2.799197  | 9.649777   | 3.989266  | 2.62691   | 9.666137   | 3.924123  | 2.816172  | 9.616347   |
| C | -3.978704 | 2.716194  | -10.098121 | -4.022611 | 2.676168  | -10.100127 | -3.82454  | 2.917372  | -10.083674 |
| C | 3.978704  | -2.716194 | -10.098121 | 4.022611  | -2.676168 | -10.100127 | 3.82454   | -2.917372 | -10.083674 |
| C | -3.902778 | -2.799197 | 9.649777   | -3.989266 | -2.62691  | 9.666137   | -3.924123 | -2.816172 | 9.616347   |
| C | 2.86705   | 3.28557   | 10.409316  | 2.982218  | 3.07952   | 10.483375  | 2.895618  | 3.310866  | 10.380406  |
| C | -2.958356 | 3.236306  | -10.855363 | -3.012788 | 3.21264   | -10.860098 | -2.789224 | 3.338525  | -10.881884 |
| C | 2.958356  | -3.236306 | -10.855363 | 3.012788  | -3.21264  | -10.860098 | 2.789224  | -3.338525 | -10.881884 |
| C | -2.86705  | -3.28557  | 10.409316  | -2.982218 | -3.07952  | 10.483375  | -2.895618 | -3.310866 | 10.380406  |
| C | 0.374131  | 3.31716   | 10.948513  | 0.502819  | 3.114725  | 11.087553  | 0.408313  | 3.344518  | 10.946208  |
| C | -6.178636 | 1.549011  | -8.311167  | -6.198064 | 1.472838  | -8.306937  | -6.046329 | 1.974122  | -8.187196  |
| C | -6.553659 | 2.90856   | -8.243739  | -6.587765 | 2.82761   | -8.227996  | -6.320968 | 3.359352  | -8.181305  |
| C | -7.183873 | 0.56023   | -8.372563  | -7.192771 | 0.47355   | -8.369426  | -7.118567 | 1.056254  | -8.15879   |
| C | -7.909801 | 3.27168   | -8.249777  | -7.947818 | 3.17591   | -8.22398   | -7.647578 | 3.816771  | -8.158973  |

|   |           |           |            |           |           |            |           |           |            |
|---|-----------|-----------|------------|-----------|-----------|------------|-----------|-----------|------------|
| C | -8.539935 | 0.924165  | -8.387953  | -8.552886 | 0.822638  | -8.37454   | -8.444783 | 1.515358  | -8.149783  |
| C | -8.906772 | 2.28138   | -8.32791   | -8.934323 | 2.175265  | -8.303201  | -8.712669 | 2.896918  | -8.150151  |
| C | 6.135377  | 1.70029   | 7.847445   | 6.143182  | 1.6349    | 7.713022   | 6.140246  | 1.692792  | 7.80733    |
| C | 6.486221  | 3.067605  | 7.810764   | 6.497443  | 3.001088  | 7.766916   | 6.491123  | 3.059377  | 7.749163   |
| C | 7.158662  | 0.728681  | 7.88521    | 7.160479  | 0.659496  | 7.629392   | 7.163997  | 0.721812  | 7.848818   |
| C | 7.83573   | 3.454548  | 7.823621   | 7.847906  | 3.382314  | 7.748748   | 7.840711  | 3.446357  | 7.745048   |
| C | 8.507926  | 1.116222  | 7.907121   | 8.510746  | 1.041738  | 7.625148   | 8.51349   | 1.109344  | 7.85327    |
| C | 8.850449  | 2.480832  | 7.87773    | 8.857966  | 2.404304  | 7.684797   | 8.855923  | 2.473366  | 7.802927   |
| C | 6.178636  | -1.549011 | -8.311167  | 6.198064  | -1.472838 | -8.306937  | 6.046329  | -1.974122 | -8.187196  |
| C | 6.553659  | -2.90856  | -8.243739  | 6.587765  | -2.82761  | -8.227996  | 6.320968  | -3.359352 | -8.181305  |
| C | 7.183873  | -0.56023  | -8.372563  | 7.192771  | -0.47355  | -8.369426  | 7.118567  | -1.056254 | -8.15879   |
| C | 7.909801  | -3.27168  | -8.249777  | 7.947818  | -3.17591  | -8.22398   | 7.647578  | -3.816771 | -8.158973  |
| C | 8.539935  | -0.924165 | -8.387953  | 8.552886  | -0.822638 | -8.37454   | 8.444783  | -1.515358 | -8.149783  |
| C | 8.906772  | -2.28138  | -8.32791   | 8.934323  | -2.175265 | -8.303201  | 8.712669  | -2.896918 | -8.150151  |
| C | -6.135377 | -1.70029  | 7.847445   | -6.143182 | -1.6349   | 7.713022   | -6.140246 | -1.692792 | 7.80733    |
| C | -6.486221 | -3.067605 | 7.810764   | -6.497443 | -3.001088 | 7.766916   | -6.491123 | -3.059377 | 7.749163   |
| C | -7.158662 | -0.728681 | 7.88521    | -7.160479 | -0.659496 | 7.629392   | -7.163997 | -0.721812 | 7.848818   |
| C | -7.83573  | -3.454548 | 7.823621   | -7.847906 | -3.382314 | 7.748748   | -7.840711 | -3.446357 | 7.745048   |
| C | -8.507926 | -1.116222 | 7.907121   | -8.510746 | -1.041738 | 7.625148   | -8.51349  | -1.109344 | 7.85327    |
| C | -8.850449 | -2.480832 | 7.87773    | -8.857966 | -2.404304 | 7.684797   | -8.855923 | -2.473366 | 7.802927   |
| C | -0.617733 | 4.296549  | -12.531813 | -0.694606 | 4.310411  | -12.543321 | -0.413906 | 4.166658  | -12.643376 |
| C | -1.535126 | 4.068234  | -13.580457 | -1.614111 | 4.076399  | -13.588856 | -1.380933 | 3.976588  | -13.654792 |
| C | 0.222595  | 5.429226  | -12.587603 | 0.130219  | 5.454542  | -12.596344 | 0.515743  | 5.222192  | -12.765103 |
| C | -1.616752 | 4.963537  | -14.658989 | -1.712997 | 4.977035  | -14.661517 | -1.422472 | 4.83679   | -14.76312  |
| C | 0.134597  | 6.329054  | -13.661717 | 0.024996  | 6.359621  | -13.664523 | 0.464502  | 6.089293  | -13.867312 |
| C | -0.786488 | 6.099144  | -14.700415 | -0.898068 | 6.123803  | -14.700139 | -0.505307 | 5.898986  | -14.869138 |
| C | 0.48365   | 4.270356  | 12.083394  | 0.665286  | 3.968899  | 12.290942  | 0.527742  | 4.310108  | 12.069729  |
| C | -0.392445 | 5.375263  | 12.149342  | -0.18322  | 5.081193  | 12.477396  | -0.350249 | 5.413666  | 12.133674  |
| C | 1.405105  | 4.060112  | 13.132443  | 1.612457  | 3.646422  | 13.287317  | 1.460725  | 4.113244  | 13.111174  |
| C | -0.335707 | 6.265632  | 13.233354  | -0.070663 | 5.873205  | 13.630821  | -0.284511 | 6.315294  | 13.20787   |
| C | 1.455936  | 4.945972  | 14.220579  | 1.715566  | 4.431926  | 14.445772  | 1.520878  | 5.010456  | 14.189533  |
| C | 0.589998  | 6.054191  | 14.271932  | 0.879342  | 5.550767  | 14.617728  | 0.652596  | 6.116946  | 14.2388    |
| C | 0.617733  | -4.296549 | -12.531813 | 0.694606  | -4.310411 | -12.543321 | 0.413906  | -4.166658 | -12.643376 |
| C | -0.222595 | -5.429226 | -12.587603 | -0.130219 | -5.454542 | -12.596344 | -0.515743 | -5.222192 | -12.765103 |
| C | 1.535126  | -4.068234 | -13.580457 | 1.614111  | -4.076399 | -13.588856 | 1.380933  | -3.976588 | -13.654792 |
| C | -0.134597 | -6.329054 | -13.661717 | -0.024996 | -6.359621 | -13.664523 | -0.464502 | -6.089293 | -13.867312 |
| C | 1.616752  | -4.963537 | -14.658989 | 1.712997  | -4.977035 | -14.661517 | 1.422472  | -4.83679  | -14.76312  |
| C | 0.786488  | -6.099144 | -14.700415 | 0.898068  | -6.123803 | -14.700139 | 0.505307  | -5.898986 | -14.869138 |
| C | -0.48365  | -4.270356 | 12.083394  | -0.665286 | -3.968899 | 12.290942  | -0.527742 | -4.310108 | 12.069729  |
| C | -1.405105 | -4.060112 | 13.132443  | -1.612457 | -3.646422 | 13.287317  | -1.460725 | -4.113244 | 13.111174  |
| C | 0.392445  | -5.375263 | 12.149342  | 0.18322   | -5.081193 | 12.477396  | 0.350249  | -5.413666 | 12.133674  |
| C | -1.455936 | -4.945972 | 14.220579  | -1.715566 | -4.431926 | 14.445772  | -1.520878 | -5.010456 | 14.189533  |
| C | 0.335707  | -6.265632 | 13.233354  | 0.070663  | -5.873205 | 13.630821  | 0.284511  | -6.315294 | 13.20787   |
| C | -0.589998 | -6.054191 | 14.271932  | -0.879342 | -5.550767 | 14.617728  | -0.652596 | -6.116946 | 14.2388    |
| H | 0.081007  | 3.442243  | -2.984399  | 0.075157  | 3.429688  | -3.010726  | 0.145388  | 3.423347  | -2.987725  |
| H | 0.134934  | 4.553096  | -5.254781  | 0.115986  | 4.550212  | -5.275349  | 0.216445  | 4.544222  | -5.248717  |
| H | 0.127956  | 3.124572  | -7.307695  | 0.104235  | 3.132005  | -7.337647  | 0.180625  | 3.133367  | -7.313891  |
| H | -0.127956 | -3.124572 | -7.307695  | -0.104235 | -3.132005 | -7.337647  | -0.180625 | -3.133367 | -7.313891  |
| H | -0.134934 | -4.553096 | -5.254781  | -0.115986 | -4.550212 | -5.275349  | -0.216445 | -4.544222 | -5.248717  |

|   |           |           |            |           |           |            |           |           |            |
|---|-----------|-----------|------------|-----------|-----------|------------|-----------|-----------|------------|
| H | -0.081007 | -3.442243 | -2.984399  | -0.075157 | -3.429688 | -3.010726  | -0.145388 | -3.423347 | -2.987725  |
| H | -5.094849 | -0.332411 | -6.710264  | -5.082504 | -0.404718 | -6.723004  | -5.051688 | 0.086008  | -6.541688  |
| H | -2.703076 | -0.994029 | -6.515083  | -2.679992 | -1.037505 | -6.544765  | -2.713959 | -0.740849 | -6.383433  |
| H | 1.971968  | 1.590593  | -9.750288  | 1.942676  | 1.618466  | -9.791749  | 2.045383  | 1.383879  | -9.825725  |
| H | 1.67714   | 3.245008  | -11.586674 | 1.618072  | 3.280084  | -11.617831 | 1.822417  | 2.992096  | -11.70815  |
| H | 5.094849  | 0.332411  | -6.710264  | 5.082504  | 0.404718  | -6.723004  | 5.051688  | -0.086008 | -6.541688  |
| H | 2.703076  | 0.994029  | -6.515083  | 2.679992  | 1.037505  | -6.544765  | 2.713959  | 0.740849  | -6.383433  |
| H | -1.971968 | -1.590593 | -9.750288  | -1.942676 | -1.618466 | -9.791749  | -2.045383 | -1.383879 | -9.825725  |
| H | -1.67714  | -3.245008 | -11.586674 | -1.618072 | -3.280084 | -11.617831 | -1.822417 | -2.992096 | -11.70815  |
| H | 5.085674  | -0.174901 | 6.216163   | 5.027126  | -0.119656 | 5.998679   | 5.074511  | -0.204222 | 6.211716   |
| H | 2.714923  | -0.889639 | 6.01279    | 2.644715  | -0.795921 | 5.821757   | 2.699888  | -0.919992 | 6.039447   |
| H | -2.014191 | 1.529665  | 9.251516   | -1.962292 | 1.493292  | 9.337094   | -1.99449  | 1.533124  | 9.294332   |
| H | -1.774462 | 3.168299  | 11.103222  | -1.644487 | 3.003678  | 11.284815  | -1.737966 | 3.191267  | 11.127371  |
| H | -5.085674 | 0.174901  | 6.216163   | -5.027126 | 0.119656  | 5.998679   | -5.074511 | 0.204222  | 6.211716   |
| H | -2.714923 | 0.889639  | 6.01279    | -2.644715 | 0.795921  | 5.821757   | -2.699888 | 0.919992  | 6.039447   |
| H | 2.014191  | -1.529665 | 9.251516   | 1.962292  | -1.493292 | 9.337094   | 1.99449   | -1.533124 | 9.294332   |
| H | 1.774462  | -3.168299 | 11.103222  | 1.644487  | -3.003678 | 11.284815  | 1.737966  | -3.191267 | 11.127371  |
| H | 0.156327  | -3.447521 | 2.507043   | 0.079677  | -3.428848 | 2.497731   | 0.14448   | -3.432092 | 2.523081   |
| H | 0.231411  | -4.539056 | 4.787005   | 0.108533  | -4.545859 | 4.761514   | 0.218223  | -4.536207 | 4.795104   |
| H | 0.196607  | -3.106264 | 6.829774   | 0.088414  | -3.128974 | 6.823154   | 0.186145  | -3.115997 | 6.85007    |
| H | -0.156327 | 3.447521  | 2.507043   | -0.079677 | 3.428848  | 2.497731   | -0.14448  | 3.432092  | 2.523081   |
| H | -0.231411 | 4.539056  | 4.787005   | -0.108533 | 4.545859  | 4.761514   | -0.218223 | 4.536207  | 4.795104   |
| H | -0.196607 | 3.106264  | 6.829774   | -0.088414 | 3.128974  | 6.823154   | -0.186145 | 3.115997  | 6.85007    |
| H | 4.913983  | 3.140259  | 9.844011   | 5.010427  | 2.93979   | 9.853064   | 4.936879  | 3.160462  | 9.796546   |
| H | 3.067476  | 4.031644  | 11.170735  | 3.214699  | 3.772289  | 11.284526  | 3.10322   | 4.066035  | 11.130939  |
| H | -3.067476 | -4.031644 | 11.170735  | -3.214699 | -3.772289 | 11.284526  | -3.10322  | -4.066035 | 11.130939  |
| H | -4.913983 | -3.140259 | 9.844011   | -5.010427 | -2.93979  | 9.853064   | -4.936879 | -3.160462 | 9.796546   |
| H | -4.998822 | 3.034631  | -10.283985 | -5.047459 | 2.983734  | -10.278407 | -4.823914 | 3.299919  | -10.25845  |
| H | -3.179003 | 3.986186  | -11.607421 | -3.246652 | 3.963986  | -11.606744 | -2.975803 | 4.076548  | -11.653949 |
| H | 4.998822  | -3.034631 | -10.283985 | 5.047459  | -2.983734 | -10.278407 | 4.823914  | -3.299919 | -10.25845  |
| H | 3.179003  | -3.986186 | -11.607421 | 3.246652  | -3.963986 | -11.606744 | 2.975803  | -4.076548 | -11.653949 |
| H | -5.790165 | 3.678136  | -8.153106  | -5.832153 | 3.604851  | -8.136548  | -5.503834 | 4.07672   | -8.155628  |
| H | -6.903057 | -0.489532 | -8.427606  | -6.900668 | -0.572648 | -8.433149  | -6.914629 | -0.01238  | -8.167083  |
| H | -8.186896 | 4.320218  | -8.188465  | -8.236045 | 4.220908  | -8.153928  | -7.848886 | 4.883874  | -8.143056  |
| H | -9.304804 | 0.155098  | -8.447364  | -9.309575 | 0.045553  | -8.434762  | -9.26316  | 0.801375  | -8.142352  |
| H | -9.955899 | 2.563623  | -8.337134  | -9.986545 | 2.445934  | -8.304565  | -9.739077 | 3.252625  | -8.138678  |
| H | 5.709273  | 3.82544   | 7.73753    | 5.72305   | 3.764519  | 7.78375    | 5.713506  | 3.81623   | 7.67283    |
| H | 6.896941  | -0.326945 | 7.917377   | 6.895416  | -0.39491  | 7.591724   | 6.902498  | -0.333256 | 7.897365   |
| H | 8.093903  | 4.509019  | 7.78586    | 8.110287  | 4.435763  | 7.778443   | 8.09849   | 4.500247  | 7.691084   |
| H | 9.286466  | 0.359772  | 7.948086   | 9.286485  | 0.283287  | 7.575333   | 9.292309  | 0.353306  | 7.897096   |
| H | 9.894354  | 2.781605  | 7.892047   | 9.903023  | 2.700864  | 7.67663    | 9.899941  | 2.774138  | 7.804002   |
| H | 5.790165  | -3.678136 | -8.153106  | 5.832153  | -3.604851 | -8.136548  | 5.503834  | -4.07672  | -8.155628  |
| H | 6.903057  | 0.489532  | -8.427606  | 6.900668  | 0.572648  | -8.433149  | 6.914629  | 0.01238   | -8.167083  |
| H | 8.186896  | -4.320218 | -8.188465  | 8.236045  | -4.220908 | -8.153928  | 7.848886  | -4.883874 | -8.143056  |
| H | 9.304804  | -0.155098 | -8.447364  | 9.309575  | -0.045553 | -8.434762  | 9.26316   | -0.801375 | -8.142352  |
| H | 9.955899  | -2.563623 | -8.337134  | 9.986545  | -2.445934 | -8.304565  | 9.739077  | -3.252625 | -8.138678  |
| H | -5.709273 | -3.82544  | 7.73753    | -5.72305  | -3.764519 | 7.78375    | -5.713506 | -3.81623  | 7.67283    |
| H | -6.896941 | 0.326945  | 7.917377   | -6.895416 | 0.39491   | 7.591724   | -6.902498 | 0.333256  | 7.897365   |
| H | -8.093903 | -4.509019 | 7.78586    | -8.110287 | -4.435763 | 7.778443   | -8.09849  | -4.500247 | 7.691084   |



|   |           |           |            |           |           |            |           |           |            |
|---|-----------|-----------|------------|-----------|-----------|------------|-----------|-----------|------------|
| H | -9.286466 | -0.359772 | 7.948086   | -9.286485 | -0.283287 | 7.575333   | -9.292309 | -0.353306 | 7.897096   |
| H | -9.894354 | -2.781605 | 7.892047   | -9.903023 | -2.700864 | 7.67663    | -9.899941 | -2.774138 | 7.804002   |
| H | -2.158901 | 3.177114  | -13.571715 | -2.226153 | 3.177143  | -13.582163 | -2.073099 | 3.139619  | -13.597312 |
| H | 0.929437  | 5.614273  | -11.781425 | 0.838467  | 5.644001  | -11.792418 | 1.261047  | 5.377097  | -11.987864 |
| H | -2.319619 | 4.772854  | -15.464948 | -2.417362 | 4.781938  | -15.465131 | -2.162404 | 4.675949  | -15.541647 |
| H | 0.778733  | 7.203359  | -13.688    | 0.657326  | 7.242581  | -13.688551 | 1.175116  | 6.906943  | -13.944626 |
| H | -0.8535   | 6.793261  | -15.53355  | -0.978418 | 6.821999  | -15.528684 | -0.542881 | 6.5672    | -15.724842 |
| H | -1.102678 | 5.547069  | 11.343199  | -0.913004 | 5.336795  | 11.712078  | -1.069399 | 5.57532   | 11.333335  |
| H | 2.056148  | 3.188837  | 13.11667   | 2.240898  | 2.765594  | 13.176367  | 2.113778  | 3.243434  | 13.097327  |
| H | -1.007438 | 7.118656  | 13.267323  | -0.718932 | 6.735108  | 13.759277  | -0.958133 | 7.166921  | 13.240156  |
| H | 2.162536  | 4.768878  | 15.026378  | 2.439534  | 4.169709  | 15.211722  | 2.236492  | 4.843449  | 14.98954   |
| H | 0.63304   | 6.741176  | 15.112527  | 0.963637  | 6.161139  | 15.512464  | 0.702646  | 6.812634  | 15.071832  |
| H | -0.929437 | -5.614273 | -11.781425 | -0.838467 | -5.644001 | -11.792418 | -1.261047 | -5.377097 | -11.987864 |
| H | 2.158901  | -3.177114 | -13.571715 | 2.226153  | -3.177143 | -13.582163 | 2.073099  | -3.139619 | -13.597312 |
| H | -0.778733 | -7.203359 | -13.688    | -0.657326 | -7.242581 | -13.688551 | -1.175116 | -6.906943 | -13.944626 |
| H | 2.319619  | -4.772854 | -15.464948 | 2.417362  | -4.781938 | -15.465131 | 2.162404  | -4.675949 | -15.541647 |
| H | 0.8535    | -6.793261 | -15.53355  | 0.978418  | -6.821999 | -15.528684 | 0.542881  | -6.5672   | -15.724842 |
| H | -2.056148 | -3.188837 | 13.11667   | -2.240898 | -2.765594 | 13.176367  | -2.113778 | -3.243434 | 13.097327  |
| H | 1.102678  | -5.547069 | 11.343199  | 0.913004  | -5.336795 | 11.712078  | 1.069399  | -5.57532  | 11.333335  |
| H | -2.162536 | -4.768878 | 15.026378  | -2.439534 | -4.169709 | 15.211722  | -2.236492 | -4.843449 | 14.98954   |
| H | 1.007438  | -7.118656 | 13.267323  | 0.718932  | -6.735108 | 13.759277  | 0.958133  | -7.166921 | 13.240156  |
| H | -0.63304  | -6.741176 | 15.112527  | -0.963637 | -6.161139 | 15.512464  | -0.702646 | -6.812634 | 15.071832  |

## References

- 1 M. Yamada, Y. Tanaka, Y. Yoshimoto, S. Kuroda and I. Shima, *Bull. Chem. Soc. Jpn.*, 1992, **65**, 1006-1011.
- 2 B. P. Sullivan, D. J. Salmon and T. J. Meyer, *Inorg. Chem.*, 1978, **17**, 3334-3341.
- 3 M.-F. Wang, R. Yang, S.-J. Tang, Y.-A. Deng, G.-K. Li, D. Zhang, D. Chen, X. Ren and F. Gao, *Angew. Chem. Int. Ed.*, 2022, **61**, e202208721.
- 4 M.-F. Wang, Y.-A. Deng, Q.-F. Li, S.-J. Tang, R. Yang, R.-Y. Zhao, F.-D. Liu, X. Ren, D. Zhang and F. Gao, *Chem. Commun.*, 2022, **58**, 12676-12679.
- 5 *Gaussian 16 Rev. C.01*, M. J. Frisch, G. W. Trucks, H. B. Schlegel, G. E. Scuseria, M. A. Robb, J. R. Cheeseman, G. Scalmani, V. Barone, G. A. Petersson, H. Nakatsuji, X. Li, M. Caricato, A. V. Marenich, J. Bloino, B. G. Janesko, R. Gomperts, B. Mennucci, H. P. Hratchian, J. V. Ortiz, A. F. Izmaylov, J. L. Sonnenberg, Williams, F. Ding, F. Lipparini, F. Egidi, J. Goings, B. Peng, A. Petrone, T. Henderson, D. Ranasinghe, V. G. Zakrzewski, J. Gao, N. Rega, G. Zheng, W. Liang, M. Hada, M. Ehara, K. Toyota, R. Fukuda, J. Hasegawa, M. Ishida, T. Nakajima, Y. Honda, O. Kitao, H. Nakai, T. Vreven, K. Throssell, J. A. Montgomery Jr., J. E. Peralta, F. Ogliaro, M. J. Bearpark, J. J. Heyd, E. N. Brothers, K. N. Kudin, V. N. Staroverov, T. A. Keith, R. Kobayashi, J. Normand, K. Raghavachari, A. P. Rendell, J. C. Burant, S. S. Iyengar, J. Tomasi, M. Cossi, J. M. Millam, M. Klene, C. Adamo, R. Cammi, J. W. Ochterski, R. L. Martin, K. Morokuma, O. Farkas, J. B. Foresman and D. J. Fox, Wallingford, CT, 2016.
- 6 H. S. Yu, X. He, S. L. Li and D. G. Truhlar, *Chem. Sci.*, 2016, **7**, 5032-5051.
- 7 T. Yanai, D. P. Tew and N. C. Handy, *Chem. Phys. Lett.*, 2004, **393**, 51-57.
- 8 Y. Zhao and D. G. Truhlar, *Theor. Chem. Acc.*, 2008, **120**, 215-241.
- 9 H. S. Yu, X. He and D. G. Truhlar, *J. Chem. Theory Comput.*, 2016, **12**, 1280-1293.
- 10 S. Grimme, J. Antony, S. Ehrlich and H. Krieg, *J. Chem. Phys.*, 2010, **132**, 154104.
- 11 S. Grimme, S. Ehrlich and L. Goerigk, *J. Comput. Chem.*, 2011, **32**, 1456-1465.
- 12 V. Barone, M. Cossi and J. Tomasi, *J. Comput. Chem.*, 1998, **19**, 404-417.
- 13 R. L. Martin, *J. Chem. Phys.*, 2003, **118**, 4775-4777.
- 14 M. Montalti and S. L. Murov, *Handbook of photochemistry*, CRC/Taylor & Francis, Boca Raton, 3rd edn., 2006.
- 15 C. Tanielian, C. Wolff and M. Esch, *J. Phys. Chem.*, 1996, **100**, 6555-6560.
- 16 W. J. Xu, S. J. Liu, X. Zhao, N. Zhao, Z. Q. Liu, H. Xu, H. Liang, Q. Zhao, X. Q. Yu and W. Huang, *Chem. Eur. J.*, 2013, **19**, 621-629.
- 17 N. P. Toupin, S. Nadella, S. J. Steinke, C. Turro and J. J. Kodanko, *Inorg. Chem.*, 2020, **59**, 3919-3933.
- 18 Z. Yu, W. K. Chan, Y. Zhang and T. T. Y. Tan, *Biomaterials*, 2021, **269**, 120459.
- 19 B. Liu, J. Jiao, W. Xu, M. Zhang, P. Cui, Z. Guo, Y. Deng, H. Chen and W. Sun, *Adv. Mater.*, 2021, **33**, e2100795.
